# Supplementary material for: Optical resolution of 1,16-dihydroxytetraphenylene by chiral gold(iii) complexation and its applications as chiral ligands in asymmetric catalysis
Source: Royal Society of Chemistry journal article supplement (doi:10.1039/d2sc00388k), 2022-01-01
Supplement: d2sc00388k1.pdf [file d2sc00388k1.pdf]

## SUPPORTING INFORMATION

---

### Supporting Information

## **Optical Resolution of 1,16-Dihydroxytetraphenylene by Chiral Gold(III) Complexation and Its Applications as Chiral Ligands in Asymmetric Catalysis**

Jia Guo,<sup>a</sup> Wen-Bin Xiong,<sup>a</sup> Hao-Ran Ma,<sup>ab</sup> Luoyi Fan,<sup>a</sup> You-Yun Zhou,<sup>a</sup> Henry N. C. Wong<sup>abc</sup> and Jian-Fang Cui<sup>\*a</sup>

---

<sup>a</sup> Department of Chemistry, Southern University of Science and Technology, 1088 Xueyuan Blvd., Shenzhen 518055, China, E-mail: cuijf@sustech.edu.cn

<sup>b</sup> School of Science and Engineering, The Chinese University of Hong Kong (Shenzhen), 2001 Longxiang Blvd., Shenzhen 518172, China

<sup>c</sup> Department of Chemistry, The Chinese University of Hong Kong, Shatin, New Territories, Hong Kong SAR, China

## General Methods

Unless otherwise noted, reagents and solvents were purchased from commercial sources and used without further purification. (±)-1,16-Dihydroxytetraphenylene (**DHTP**) were synthesized according to literature procedure (*Synthesis*, **2017**, *49*, 181-187). Enantiopure oxazoline-based cyclometalated gold(III) dichlorides were synthesized according to literatures (*Angew. Chem. Int. Ed.*, **2017**, *56*, 3074-3079; *Org. Lett.*, **2019**, *21*, 6289-6294). Potassium alkynyltrifluoroborates were prepared according to literatures (*Org. Lett.*, **2020**, *22*, 7427-7423; *Org. Lett.*, **2013**, *15*, 5052-5055). Allylic alcohol substrates were prepared according to literatures (*Angew. Chem. Int. Ed.*, **2012**, *51*, 3470-3473; *Synthesis* **2015**, *47*, 976-984; *Synthesis*, **2011**, 2600-2608). Thin layer chromatography was performed on precoated silica gel 60 F<sup>254</sup> plates. Flash column chromatography was performed using silica gel (200-300 mesh). <sup>1</sup>H NMR and <sup>13</sup>C NMR spectra were recorded on Bruker Ascend<sup>TM</sup> 400 and Ascend<sup>TM</sup> 600 spectrometers. Chemical shifts (ppm) were referenced to TMS and coupling constants are given in Hz. Data for <sup>1</sup>H NMR were recorded as follows: chemical shift (δ, ppm), multiplicity (s, singlet; brs, broad singlet; d, doublet; dd, double doublet; ddd, double-double doublet; t, triplet; td, triple doublet; tt, triple triplet; q, quartet; qd, quadruple doublet, m, multiplet), coupling constant (Hz), integration. Data for <sup>13</sup>C NMR are reported in terms of chemical shift (δ, ppm). Data for <sup>19</sup>F NMR and <sup>31</sup>P NMR were reported in terms of chemical shift (δ, ppm). High resolution mass spectra (HRMS) were obtained on Thermo Scientific Q Exactive, or Waters Xevo G2-XS QToF spectrometers. X-ray crystallographic data were recorded on Bruker D8 VENTURE. High pressure liquid chromatography (HPLC) analyses were performed on Agilent 1260 Infinity II equipped with chiral column from Daicel<sup>®</sup>. Circular dichroism (CD) spectra were measured on an Applied Photophysics Chirascan spectrometer. Melting points (mp) were determined on an SGW X-4A microscopic melting point apparatus. Optical rotations were recorded on a Rudolph Automatic Polarimeter. IR spectra were collected on Bruker VERTEX 70v and Bruker VERTEX 80v spectrometers. Known compounds were characterized by comparison of their <sup>1</sup>H, and <sup>13</sup>C NMR spectra the previously reported data.

## SUPPORTING INFORMATION

Table S1 References of Key Known Compounds Used in this Article

| Compounds                                                                                         | References                                                                                                                                                                                                                                                                                                       |
|---------------------------------------------------------------------------------------------------|------------------------------------------------------------------------------------------------------------------------------------------------------------------------------------------------------------------------------------------------------------------------------------------------------------------|
| 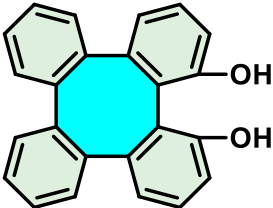 <p>(±)-DHTP</p> | <p>a) J.-F. Wen, W. Hong, K. Yuan, T. C. W. Mak and H. N. C. Wong, <i>J. Org. Chem.</i>, <b>2003</b>, 68, 8918-8931;</p> <p>b) J.-F. Cui, H. Huang and H. N. C. Wong, <i>Synlett</i>, <b>2011</b>, 1018-1022;</p> <p>c) G.-L. Chai, J.-W. Han and H. N. C. Wong, <i>Synthesis</i>, <b>2017</b>, 49, 181-187.</p> |
|  <p>(R)-3</p>    | <p>J.-F. Cui, H.-M. Ko, K.-P. Shing, J.-R. Deng, N. C.-H. Lai and M.-K. Wong, <i>Angew. Chem. Int. Ed.</i>, <b>2017</b>, 56, 3074-3079.</p>                                                                                                                                                                      |
|  <p>(S)-3</p>   | <p>J.-F. Cui, H.-M. Ko, K.-P. Shing, J.-R. Deng, N. C.-H. Lai and M.-K. Wong, <i>Angew. Chem. Int. Ed.</i>, <b>2017</b>, 56, 3074-3079.</p>                                                                                                                                                                      |
|  <p>(R)-3b</p> | <p>J.-F. Cui, H.-M. Ko, K.-P. Shing, J.-R. Deng, N. C.-H. Lai and M.-K. Wong, <i>Angew. Chem. Int. Ed.</i>, <b>2017</b>, 56, 3074-3079.</p>                                                                                                                                                                      |
|  <p>(R)-3c</p> | <p>J.-F. Cui, H.-M. Ko, K.-P. Shing, J.-R. Deng, N. C.-H. Lai and M.-K. Wong, <i>Angew. Chem. Int. Ed.</i>, <b>2017</b>, 56, 3074-3079.</p>                                                                                                                                                                      |

## SUPPORTING INFORMATION

|                                                                                                  |                                                                                                                                                                       |
|--------------------------------------------------------------------------------------------------|-----------------------------------------------------------------------------------------------------------------------------------------------------------------------|
| 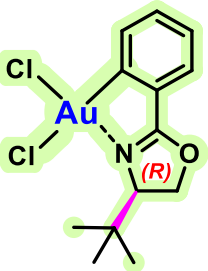 <p>(R)-3d</p>  | <p>J.-J. Jiang, J.-F. Cui, B. Yang, Y. Ning, N. C.-H. Lai and M.-K. Wong, <i>Org. Lett.</i>, <b>2019</b>, <i>21</i>, 6289-6294.</p>                                   |
|  <p>(S)-5</p>   | <p>H. Huang, T. Stewart, M. Gutmann, T. Ohhara, N. Niimura, Y.-X. Li, J.-F. Wen, R. Bau and H. N. C. Wong, <i>J. Org. Chem.</i>, <b>2009</b>, <i>74</i>, 359-369.</p> |
|  <p>(S)-8a</p> | <p>G.-L. Chai, B. Zhu and J. Chang, <i>J. Org. Chem.</i>, <b>2019</b>, <i>84</i>, 120-127.</p>                                                                        |



# SUPPORTING INFORMATION

## Experimental Procedures

### HPLC spectrum of ( $\pm$ )-DHTP:

Daicel Chiralpak<sup>®</sup> AD-H, 40% *i*PrOH, 60% hexane, 0.7 mL/min, 30 °C, 220 nm;  $t_{R1}$  = 8.11 min,  $t_{R2}$  = 12.69 min.

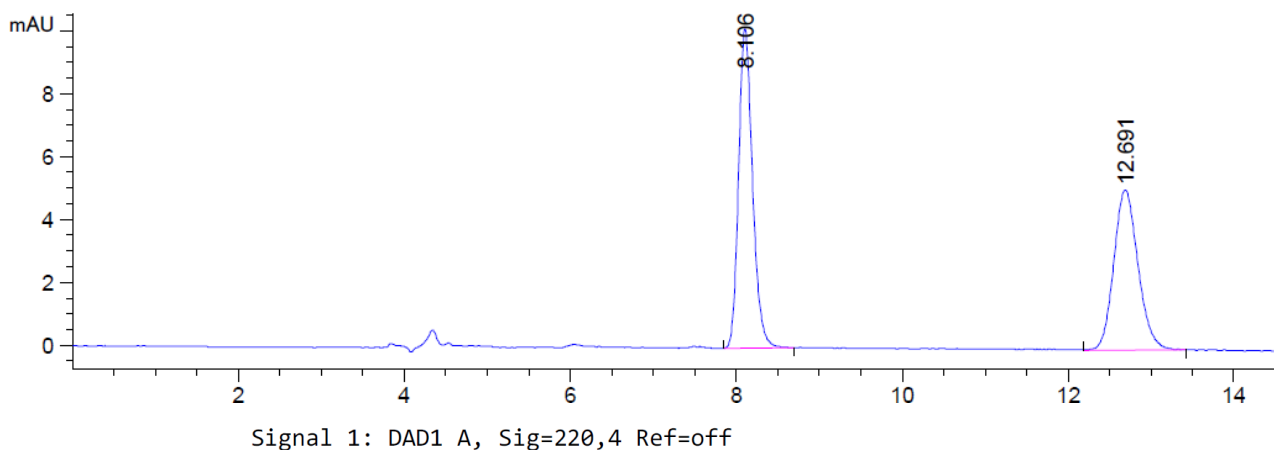

| Peak # | RetTime [min] | Type | Width [min] | Area [mAU*s] | Height [mAU] | Area %  |
|--------|---------------|------|-------------|--------------|--------------|---------|
| 1      | 8.106         | BB   | 0.1807      | 1353.62769   | 115.51038    | 53.6074 |
| 2      | 12.689        | BB   | 0.3123      | 1171.44958   | 57.83095     | 46.3926 |

### Procedure for Optical Resolution of ( $\pm$ )-DHTP by Enantiopure (*R*)-3

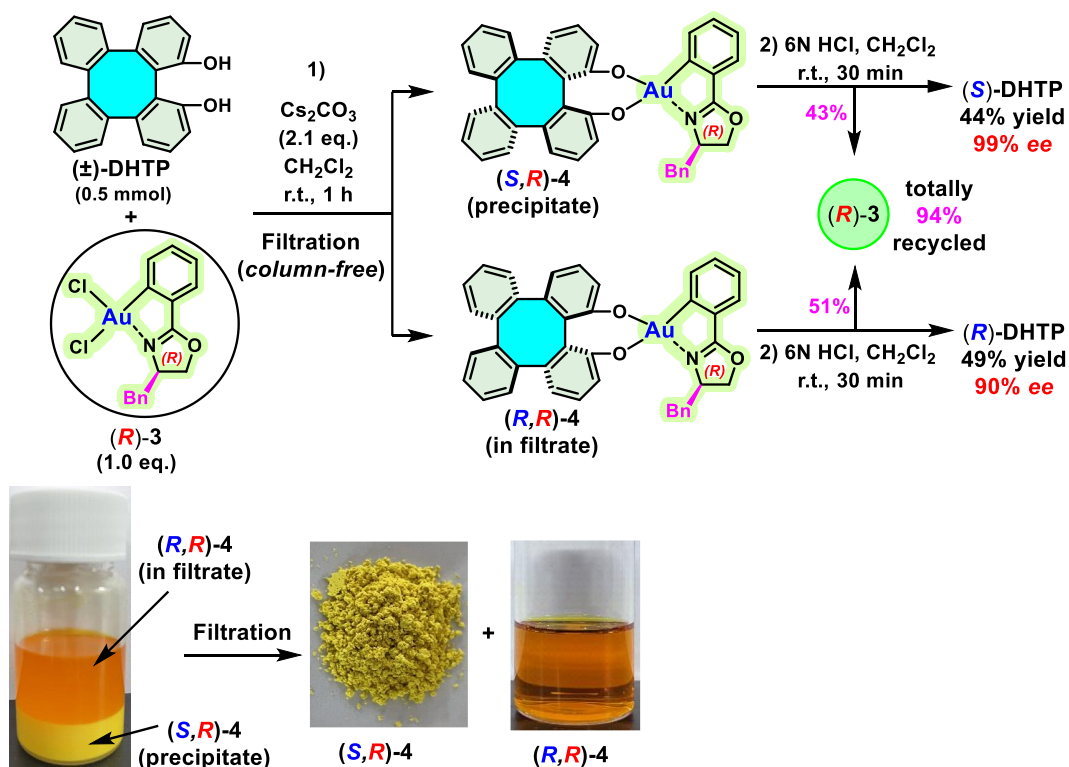

## SUPPORTING INFORMATION

To a solution of ( $\pm$ )-1,16-dihydroxytetraphenylene (**DHTP**) (168 mg, 0.5 mmol) and  $\text{Cs}_2\text{CO}_3$  (342 mg, 2.1 eq.) in  $\text{CH}_2\text{Cl}_2$  (10 mL) was added enantiopure oxazoline-based cyclometalated gold(III) dichloride (**(R)-3**) (252 mg, 1.0 eq.). A yellow precipitate was formed in a suspension quickly (within minutes). The resulting mixture was stirred for additional 1 h at room temperature (25 °C). The yellow precipitate was collected by filtration, washed with  $\text{H}_2\text{O}$  (5 mL  $\times$  2) and  $\text{CH}_2\text{Cl}_2$  (5 mL  $\times$  2), dried under vacuum to give *O,O'*-chelated **DHTP/Au(III)** complexes (**(S,R)-4**) as a yellow powder. Subsequently, the obtained (**(S,R)-4**) was added in  $\text{CH}_2\text{Cl}_2$  (10 mL). To the resulting suspension of (**(S,R)-4**) in  $\text{CH}_2\text{Cl}_2$  was added 6N hydrochloric acid (2 mL) at room temperature. After being stirred for 30 min, the solvent was removed under reduced pressure. The residue was purified by flash chromatography on silica gel (100%  $\text{CH}_2\text{Cl}_2$  to EtOAc/hexane 1:1) to give (**(S)-DHTP**) as a white solid (74 mg, 44% yield, 99% *ee*), and recovered (**(R)-3**) (108 mg, 43% yield).

**HPLC** spectrum of the obtained (**(S)-DHTP**): Daicel Chiralpak<sup>®</sup> AD-H, 40% *i*PrOH, 60% hexane, 0.7 mL/min, 30 °C, 220 nm; 99% *ee* ( $t_{\text{R}}$  (major) = **8.10 min**,  $t_{\text{R}}$ (minor) = 12.39 min).

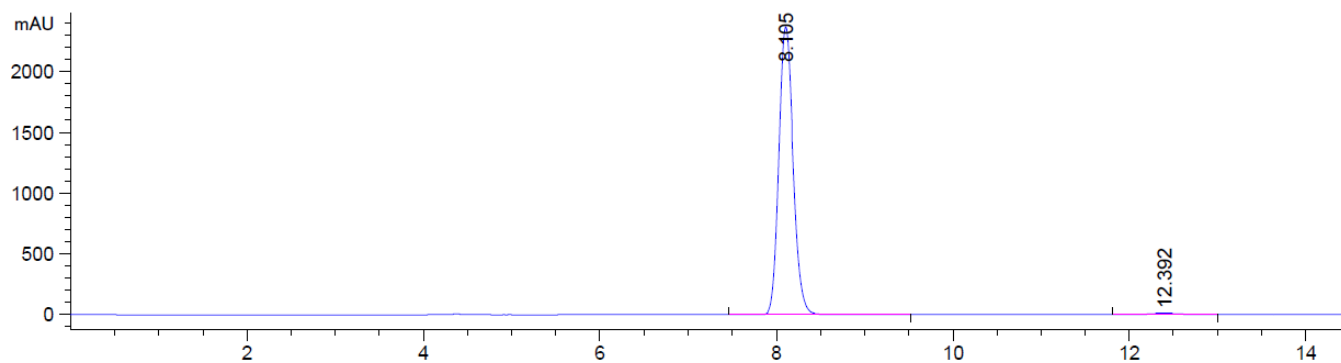

Signal 2: DAD1 B, Sig=220,4 Ref=off

| Peak # | RetTime [min] | Type | Width [min] | Area [mAU*s] | Height [mAU] | Area %  |
|--------|---------------|------|-------------|--------------|--------------|---------|
| 1      | 8.105         | BB   | 0.1749      | 2.65666e4    | 2367.14819   | 99.2822 |
| 2      | 12.392        | BB   | 0.2897      | 192.07320    | 10.19740     | 0.7178  |

## SUPPORTING INFORMATION

The filtrate [ $\sim 20$  mL DCM, mainly containing (*R,R*)-**4**] was washed with H<sub>2</sub>O (10 mL  $\times$  2) and the CH<sub>2</sub>Cl<sub>2</sub> layer was separated. To the collected CH<sub>2</sub>Cl<sub>2</sub> layer was added 6N hydrochloric acid (2 mL) at room temperature. After being stirred for 30 min, the solvent was removed under reduced pressure. The residue was purified by flash chromatography on silica gel (100% CH<sub>2</sub>Cl<sub>2</sub> to EtOAc/hexane 1:1) to give (*R*)-**DHTP** as a white solid (83 mg, 49% yield, 90% *ee*), and recovered (*R*)-**3** (127 mg, 51% yield).

**HPLC** spectrum of the obtained (*R*)-**DHTP**: Daicel Chiralpak<sup>®</sup> AD-H, 40% *i*PrOH, 60% hexane, 0.7 mL/min, 30 °C, 220 nm; 90% *ee* ( **$t_R$  (major) = 12.34 min**,  $t_R$ (minor) = 8.08 min).

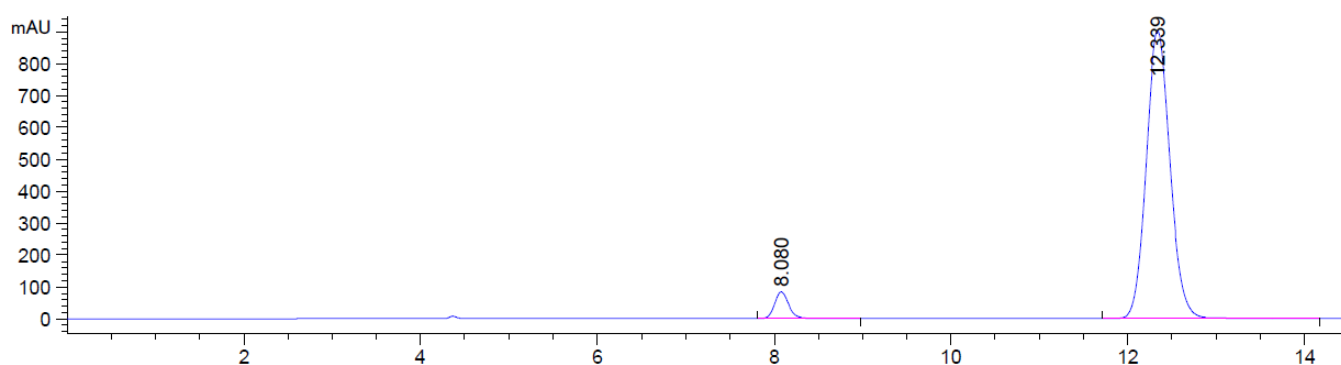

Signal 2: DAD1 B, Sig=220,4 Ref=off

| Peak # | RetTime [min] | Type | Width [min] | Area [mAU*s] | Height [mAU] | Area %  |
|--------|---------------|------|-------------|--------------|--------------|---------|
| 1      | 8.080         | BB   | 0.1659      | 899.11420    | 83.29595     | 5.0858  |
| 2      | 12.339        | BB   | 0.2871      | 1.67796e4    | 901.87585    | 94.9142 |

## SUPPORTING INFORMATION

### HPLC Spectra of (*S*)-DHTP and (*R*)-DHTP from Multi-Grams Scale Optical Resolution of ( $\pm$ )-DHTP and Recyclability Experiments of (*R*)-**3**<sup>[a][b][c]</sup>

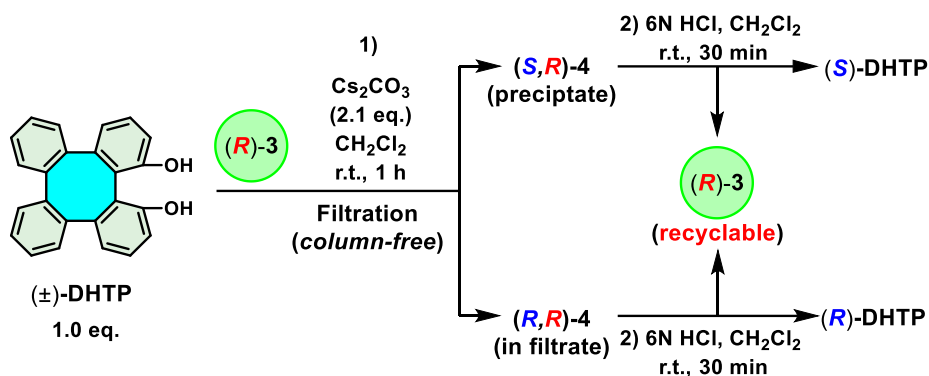

| Entry            | Scale of ( $\pm$ )-DHTP (mmol) | Yield and <i>ee</i> of ( <i>S</i> )-DHTP | Yield and <i>ee</i> of ( <i>R</i> )-DHTP | Recovery yield of ( <i>R</i> )- <b>3</b> (%) |
|------------------|--------------------------------|------------------------------------------|------------------------------------------|----------------------------------------------|
|                  |                                | Yield [ <i>ee</i> ] (%)                  | Yield [ <i>ee</i> ] (%)                  |                                              |
| 1                | 30                             | 45 [99]                                  | 49 [88]                                  | 98 ( <b>14.8 g</b> )                         |
| 2 <sup>[d]</sup> | 25                             | 47 [99]                                  | 50 [95]                                  | 99                                           |
| 3 <sup>[d]</sup> | 20                             | 45 [99]                                  | 50 [89]                                  | 98                                           |
| 4 <sup>[d]</sup> | 15                             | 46 [99]                                  | 49 [93]                                  | 98                                           |
| 5 <sup>[d]</sup> | 10                             | 46 [99]                                  | 48 [96]                                  | 99                                           |
| 6 <sup>[d]</sup> | 5                              | 48 [99]                                  | 50 [87]                                  | 98                                           |

[a] Reaction conditions: step 1): ( $\pm$ )-DHTP (1.0 eq.), (*R*)-**3** (1.0 eq.),  $\text{Cs}_2\text{CO}_3$  (2.1 eq.),  $\text{CH}_2\text{Cl}_2$  ([substrate] = 0.1 M), room temperature (25 °C), reaction time: 1 h; step 2):  $\text{CH}_2\text{Cl}_2$  ([substrate] = 0.1 M), HCl (6 N, aq.), room temperature, reaction time: 30 min. [b] Yield of isolated product. [c] *ee*% was determined by chiral HPLC analysis. [d] (*R*)-**3** came from the last reaction cycle.

HPLC analyses conditions: Daicel Chiralpak<sup>®</sup> AD-H, 40% *i*PrOH, 60% hexane, 0.7 mL/min, 30 °C, 220 nm.

# SUPPORTING INFORMATION

## A) HPLC Spectra of the Obtained (S)-DHTP from Different Scales

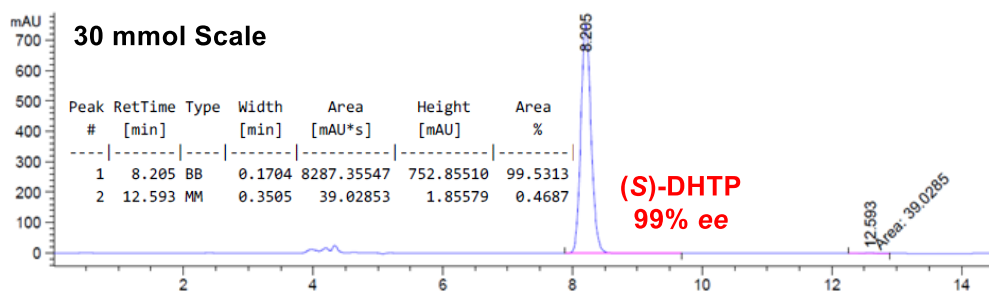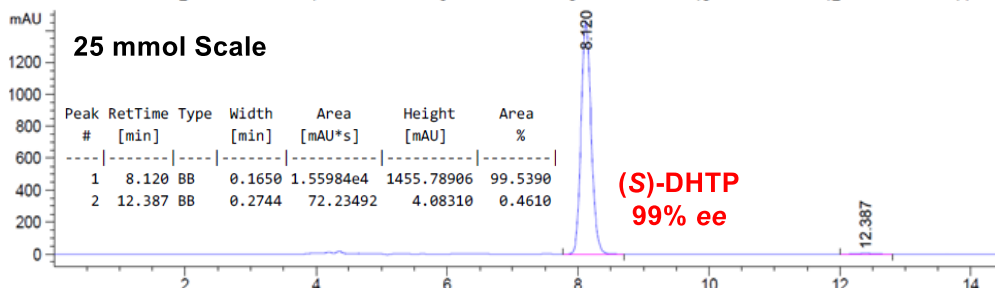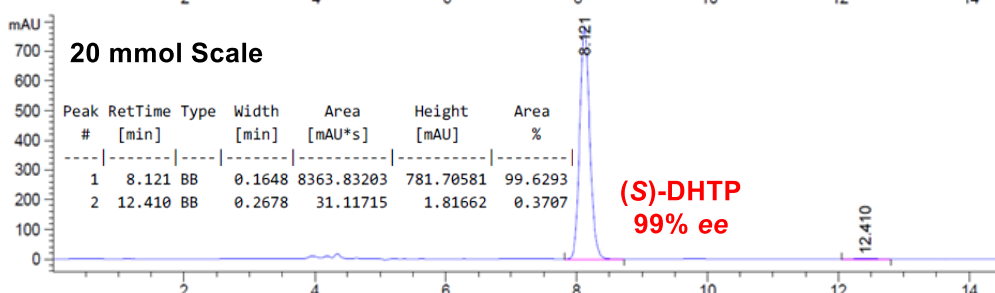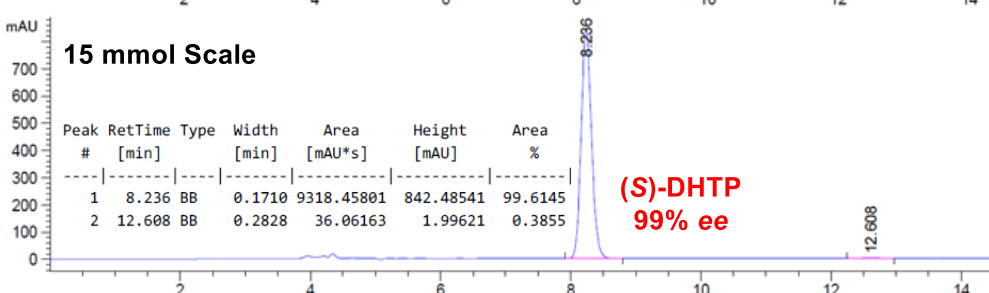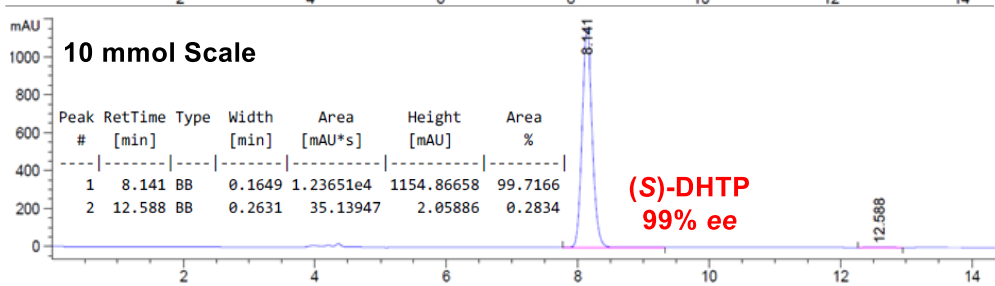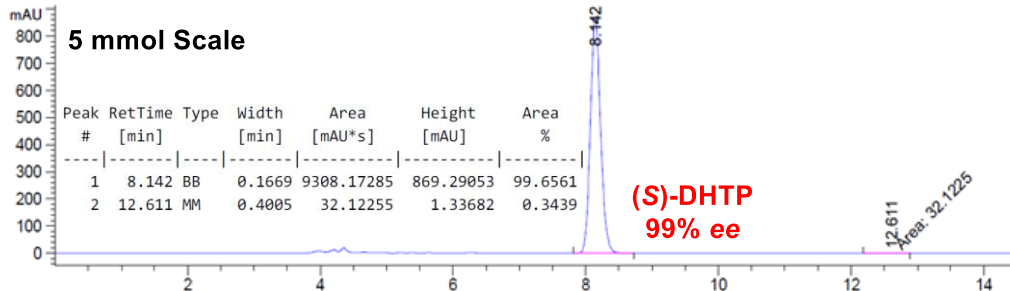

# SUPPORTING INFORMATION

## B) HPLC Spectra of the Obtained (*R*)-DHTP from Different Scales

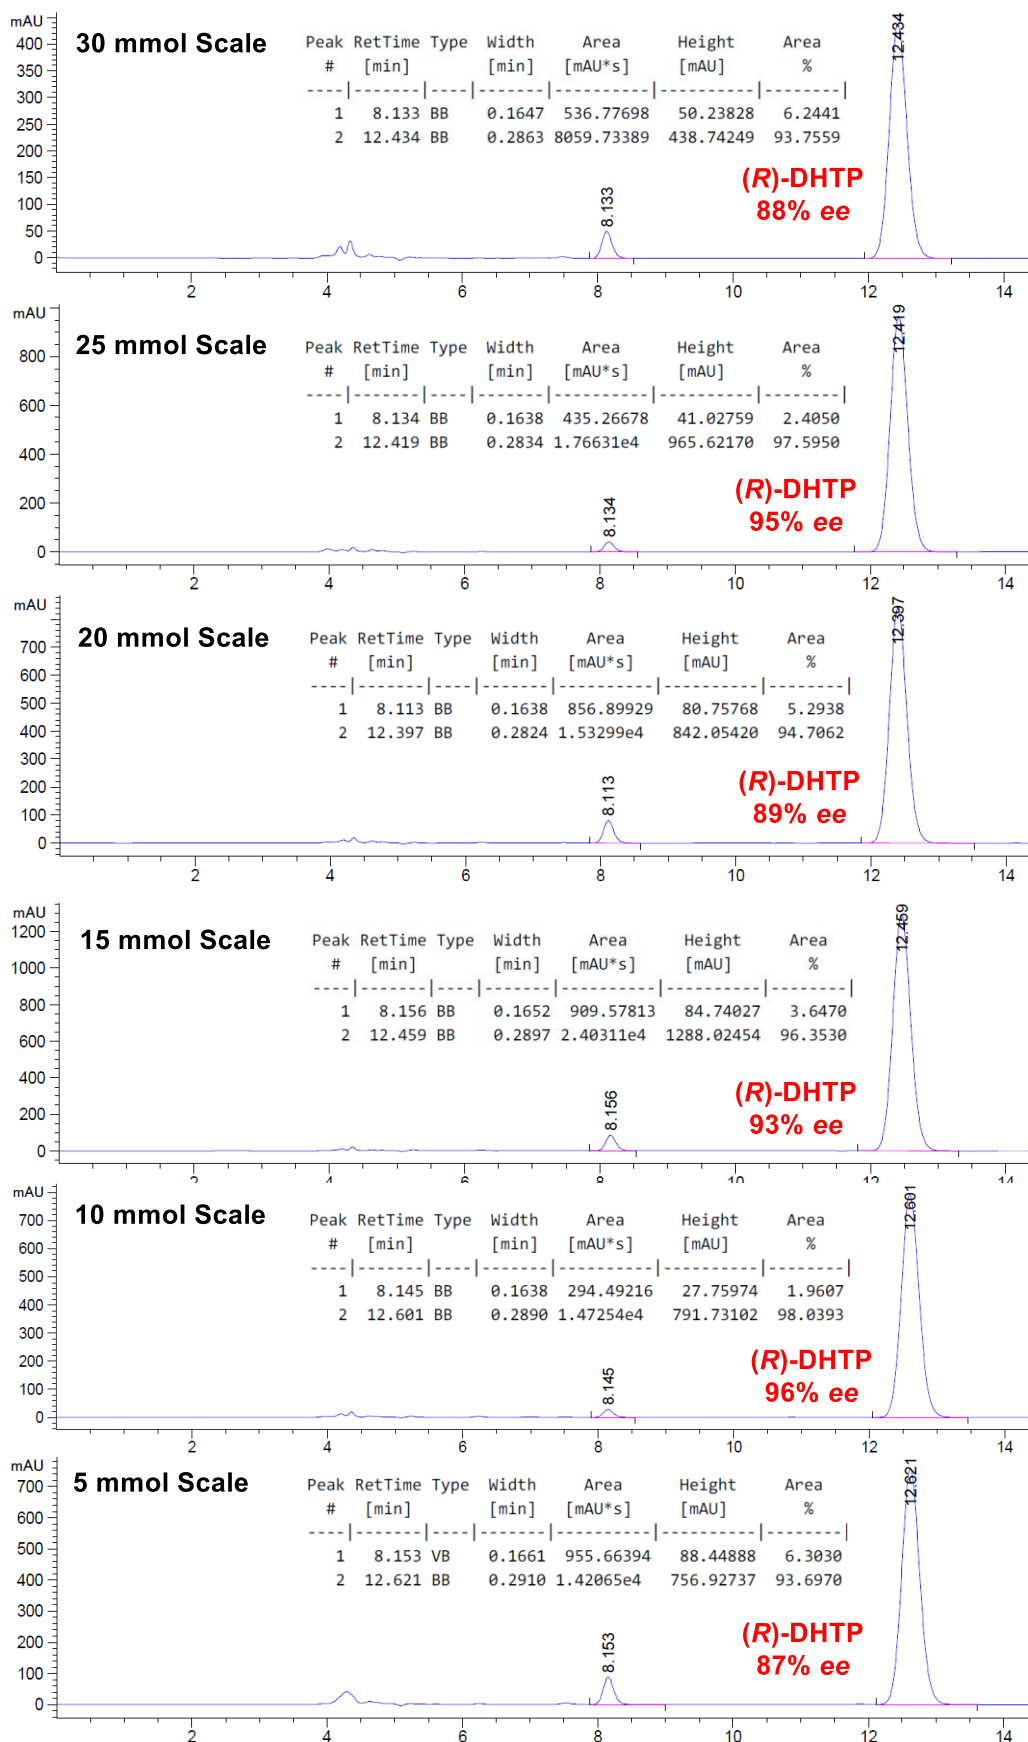

## SUPPORTING INFORMATION

### Procedure for Optical Resolution of ( $\pm$ )-DHTP by Enantiopure (*S*)-3

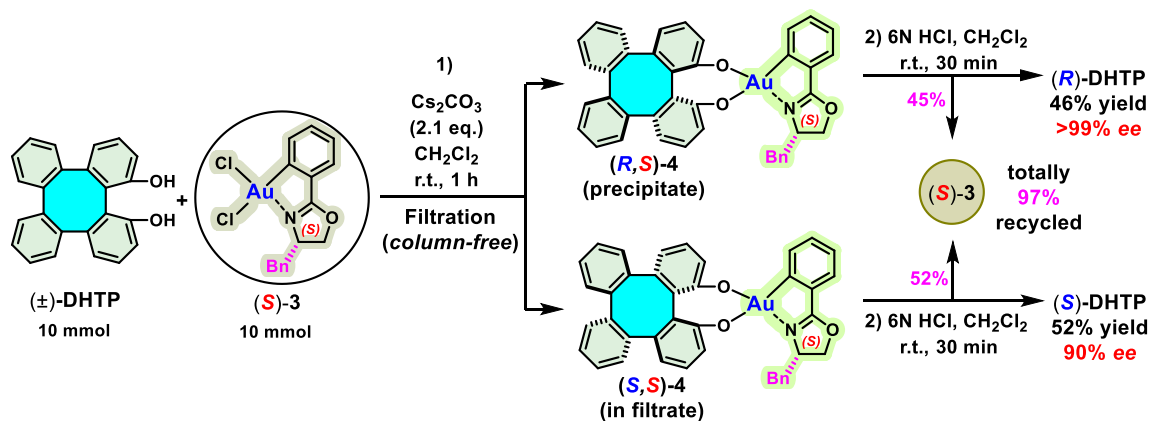

To a solution of ( $\pm$ )-**DHTP** (3.36 g, 10 mmol) and  $\text{Cs}_2\text{CO}_3$  (6.83 g, 2.1 eq.) in  $\text{CH}_2\text{Cl}_2$  (100 mL) was added enantiopure oxazoline-based cyclometalated gold(III) dichloride (*S*)-**3** (5.04 g, 10 mmol). A yellow precipitate was formed in a suspension quickly (within minutes). The resulting mixture was stirred for additional 1 h at room temperature (25 °C). The yellow precipitate was collected by filtration, washed with  $\text{H}_2\text{O}$  (100 mL  $\times$  2) and  $\text{CH}_2\text{Cl}_2$  (100 mL  $\times$  2), dried under vacuum to give *O,O'*-chelated **DHTP**/Au(III) complexes (*R,S*)-**4** as a yellow powder. Subsequently, the obtained (*R,S*)-**4** was added in  $\text{CH}_2\text{Cl}_2$  (50 mL). To the resulting suspension of (*R,S*)-**4** in  $\text{CH}_2\text{Cl}_2$  was added 6N hydrochloric acid (10 mL) at room temperature. After being stirred for 30 min, the solvent was removed under reduced pressure. The residue was purified by flash chromatography on silica gel (100%  $\text{CH}_2\text{Cl}_2$  to EtOAc/hexane 1:1) to give (*R*)-**DHTP** as a white solid (1.55 g, 46% yield, >99% *ee*), and recovered (*S*)-**3** (2.26 g, 45% yield).

**HPLC** spectrum of the obtained (*R*)-**DHTP**: Daicel Chiralpak<sup>®</sup> AD-H, 40% *i*PrOH, 60% hexane, 0.7 mL/min, 30 °C, 220 nm; >99% *ee* ( $t_{\text{R}}$  (major) = 12.53 min,  $t_{\text{R}}$ (minor) = 8.12 min).

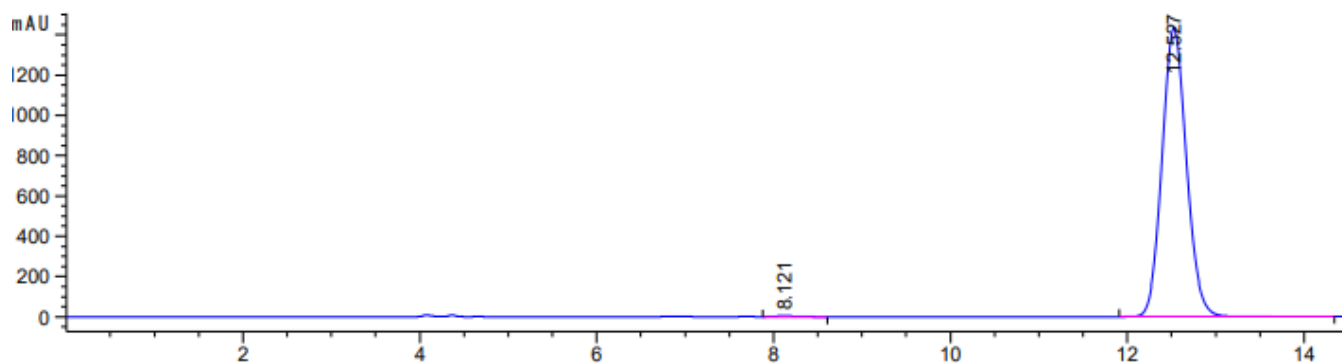

## SUPPORTING INFORMATION

Signal 2: DAD1 B, Sig=220,4 Ref=off

| Peak # | RetTime [min] | Type | Width [min] | Area [mAU*s] | Height [mAU] | Area %  |
|--------|---------------|------|-------------|--------------|--------------|---------|
| 1      | 8.121         | BB   | 0.1711      | 66.52022     | 5.91744      | 0.2408  |
| 2      | 12.527        | BB   | 0.2980      | 2.75638e4    | 1435.65161   | 99.7592 |

The filtrate [ $\sim$  300 mL  $\text{CH}_2\text{Cl}_2$ , mainly containing (*S,S*)-**4**] was washed with  $\text{H}_2\text{O}$  (100 mL  $\times$  2) and the  $\text{CH}_2\text{Cl}_2$  layer was separated. To the collected  $\text{CH}_2\text{Cl}_2$  layer was added 6N hydrochloric acid (10 mL) at room temperature. After being stirred for 30 min, the solvent was removed under reduced pressure. The residue was purified by flash chromatography on silica gel (100%  $\text{CH}_2\text{Cl}_2$  to EtOAc/hexane 1:1) to give (*S*)-**DHTP** as a white solid (1.74 g, 52% yield, 90% *ee*), and recovered (*S*)-**3** (2.61 g, 52% yield).

**HPLC** spectrum of the obtained (*S*)-**DHTP**: Daicel Chiralpak<sup>®</sup> AD-H, 40% *i*PrOH, 60% hexane, 0.7 mL/min, 30 °C, 220 nm; 90% *ee* ( $t_{\text{R}}$  (major) = **8.18 min**,  $t_{\text{R}}$ (minor) = 12.64 min).

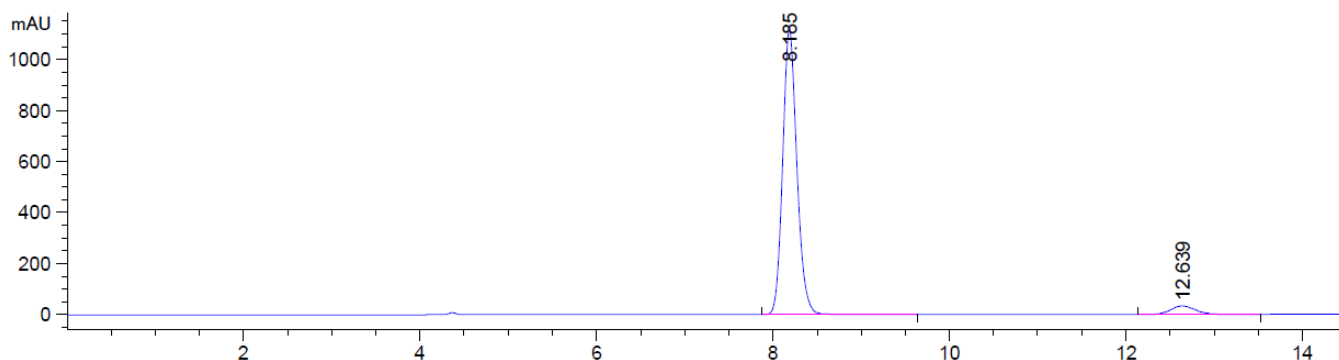

Signal 2: DAD1 B, Sig=220,4 Ref=off

| Peak # | RetTime [min] | Type | Width [min] | Area [mAU*s] | Height [mAU] | Area %  |
|--------|---------------|------|-------------|--------------|--------------|---------|
| 1      | 8.185         | BB   | 0.1727      | 1.26352e4    | 1128.18079   | 95.1578 |
| 2      | 12.639        | BB   | 0.3024      | 642.95929    | 32.84866     | 4.8422  |



## SUPPORTING INFORMATION

### General Procedure for Synthesis of Enantiopure DHTP/oxazoline Au(III) Complexes

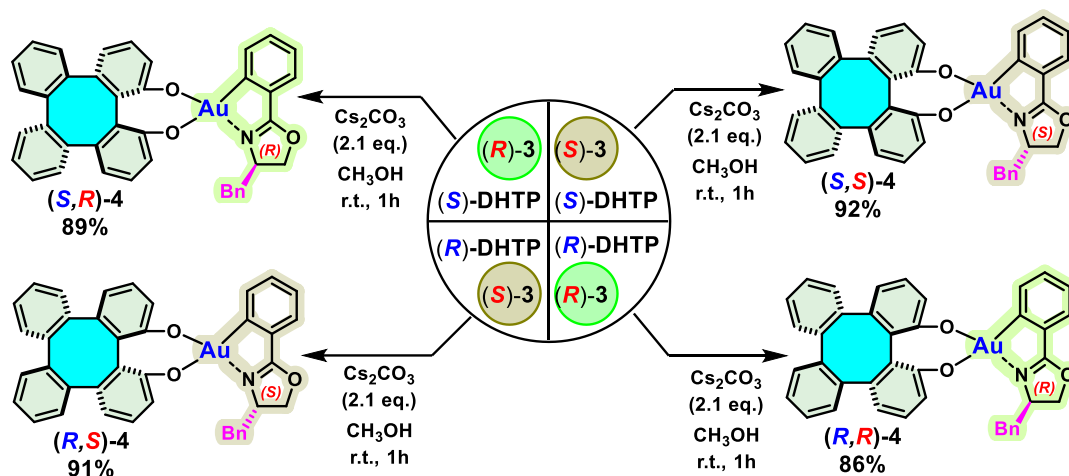

To a solution of enantiopure (*S*)-DHTP or (*R*)-DHTP (34.0 mg, 0.1 mmol) and  $\text{Cs}_2\text{CO}_3$  (68.3 mg, 0.21 mmol) in  $\text{CH}_3\text{OH}$  (2.0 mL) was added enantiopure oxazoline-based cyclometalated gold(III) dichloride (*R*)-3 or (*S*)-3 (50.4 mg, 0.1 mmol) at room temperature (25 °C). A yellow precipitate was formed in a suspension quickly (within minutes). The mixture was stirred for additional 1 h at room temperature, and then the precipitate was collected by filtration, washed by  $\text{H}_2\text{O}$  and  $\text{CH}_3\text{OH}$ , dried under vacuum to give the corresponding *O,O'*-chelated DHTP/oxazoline Au(III) complexes (*S,R*)-4, (*R,S*)-4, (*S,S*)-4 and (*R,R*)-4, respectively.

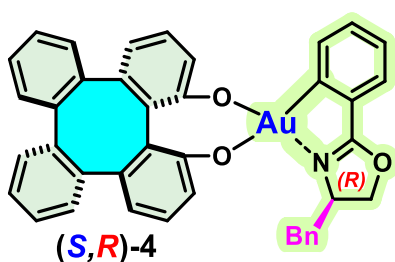

Yellow solid. 68.0 mg, 89% yield. mp 236.7 – 237.2 °C.  $[\alpha]^{20}_{\text{D}}$ : –979.7 ( $c = 1.06$ ,  $\text{CHCl}_3$ ).

$^1\text{H NMR}$  (600 MHz,  $\text{DMSO}-d_6$ )  $\delta$  7.75 (d,  $J = 7.7$  Hz, 1H), 7.59 (t,  $J = 7.4$  Hz, 1H), 7.46 – 7.40 (m, 2H), 7.34 – 7.23 (m, 8H), 7.23 – 7.19 (m, 1H), 7.15 (q,  $J = 2.5$  Hz, 2H), 7.12 – 7.07 (m, 2H), 7.06 – 6.99 (m, 3H), 6.88 (d,  $J = 7.9$  Hz, 1H), 6.73 (d,  $J = 6.5$  Hz, 1H), 6.50 (d,  $J = 7.5$  Hz, 1H), 5.09 (t,  $J = 8.7$  Hz, 1H), 4.93 – 4.84 (m, 2H), 3.56 (d,  $J = 13.4$  Hz, 1H), 3.04 (dd,  $J = 13.6, 8.9$  Hz, 1H).

$^{13}\text{C NMR}$  (150 MHz,  $\text{DMSO}-d_6$ )  $\delta$  180.32, 161.08, 160.10, 144.31, 143.53, 142.72, 142.56, 142.30, 141.66, 141.34, 136.47, 134.58, 134.03, 131.81, 129.85, 129.17, 129.09, 129.06, 128.88, 128.59, 128.16,

## SUPPORTING INFORMATION

128.13, 128.08, 127.66, 127.58, 127.56, 127.42, 127.36, 124.09, 121.86, 121.70, 120.77, 77.82, 62.43, 38.02.

**HRMS (ESI):**  $[M+H]^+$  Calcd. for  $[C_{40}H_{29}O_3NAu]^+$  768.1807, found 768.1809.

**IR** (neat): 3058, 3027, 2923, 2852, 1620, 1579, 1560, 1491, 1430, 1306, 1265, 1243, 907, 731  $cm^{-1}$ .

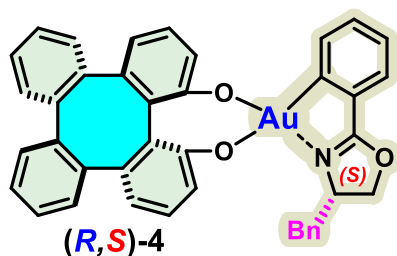

Yellow solid. 70.0 mg, 91% yield. mp 228.9 – 230.4 °C.  $[\alpha]_D^{20}$ : +924.0 ( $c = 1.0$ ,  $CHCl_3$ ).

**$^1H$  NMR** (600 MHz,  $DMSO-d_6$ )  $\delta$  7.75 (d,  $J = 7.8$  Hz, 1H), 7.59 (t,  $J = 7.4$  Hz, 1H), 7.46 – 7.40 (m, 2H), 7.33 – 7.24 (m, 8H), 7.21 (t,  $J = 7.4$  Hz, 1H), 7.15 (d,  $J = 6.3$  Hz, 2H), 7.10 (t,  $J = 8.3$  Hz, 2H), 7.06 – 7.00 (m, 3H), 6.88 (d,  $J = 7.9$  Hz, 1H), 6.73 (d,  $J = 6.3$  Hz, 1H), 6.50 (d,  $J = 7.5$  Hz, 1H), 5.09 (t,  $J = 8.8$  Hz, 1H), 4.93 – 4.84 (m, 2H), 3.56 (d,  $J = 12.3$  Hz, 1H), 3.03 (dd,  $J = 13.6, 8.9$  Hz, 1H).

**$^{13}C$  NMR** (150 MHz,  $DMSO-d_6$ )  $\delta$  180.31, 161.08, 160.10, 144.31, 143.53, 142.72, 142.56, 142.30, 141.66, 141.34, 136.47, 134.58, 134.03, 131.81, 129.85, 129.17, 129.10, 129.06, 128.88, 128.59, 128.16, 128.13, 128.08, 127.66, 127.58, 127.55, 127.42, 127.36, 124.09, 121.86, 121.70, 120.77, 77.82, 62.43, 38.02.

**HRMS (ESI):**  $[M+H]^+$  Calcd. for  $[C_{40}H_{29}O_3NAu]^+$  768.1807, found 768.1808.

**IR** (neat): 3055, 3026, 2925, 2852, 1619, 1578, 1560, 1490, 1430, 1306, 1266, 1243, 910, 733  $cm^{-1}$ .

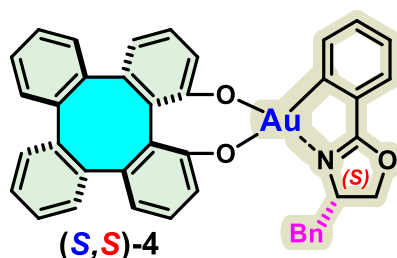

Yellow solid. 71.0 mg, 92% yield. mp 235.9 – 236.5 °C.  $[\alpha]_D^{20}$ : –658.2 ( $c = 1.0$ ,  $CHCl_3$ ).

**$^1H$  NMR** (600 MHz,  $CD_2Cl_2$ )  $\delta$  7.95 (d,  $J = 7.8$  Hz, 1H), 7.54 (td,  $J = 7.6, 1.6$  Hz, 1H), 7.40 – 7.22 (m, 13H), 7.18 (dd,  $J = 5.6, 3.3$  Hz, 1H), 7.16 (td,  $J = 8.3, 1.8$  Hz, 2H), 7.05 (dt,  $J = 14.0, 7.7$  Hz, 2H), 6.98 (dd,  $J = 8.1, 1.3$  Hz, 1H), 6.86 (dd,  $J = 7.6, 1.3$  Hz, 1H), 6.63 (dd,  $J = 7.4, 1.3$  Hz, 1H), 4.84 – 4.72 (m, 3H), 3.76 (dd,  $J = 13.8, 2.9$  Hz, 1H), 3.33 (dd,  $J = 13.8, 7.0$  Hz, 1H).

## SUPPORTING INFORMATION

**$^{13}\text{C}$  NMR** (150 MHz,  $\text{CD}_2\text{Cl}_2$ )  $\delta$  181.20, 160.55, 144.93, 144.09, 143.68, 143.12, 142.48, 142.26, 141.76, 135.48, 134.82, 134.57, 132.43, 130.36, 129.53, 129.51, 129.20, 129.07, 129.00, 128.70, 128.39, 128.36, 128.00, 127.87, 127.67, 127.64, 127.41, 127.38, 124.84, 122.28, 121.35, 121.27, 76.90, 62.68, 39.38.

**DEPT135  $^{13}\text{C}$  NMR** (150 MHz,  $\text{CD}_2\text{Cl}_2$ )  $\delta$  134.27, 129.82, 128.99, 128.96, 128.66, 128.53, 128.45, 128.16, 127.85, 127.81, 127.45, 127.33, 127.12, 127.09, 126.86, 124.30, 121.74, 120.81, 120.72, 76.35( $\text{CH}_2$ ), 62.13, 38.83( $\text{CH}_2$ ).

**HRMS (ESI):**  $[\text{M}+\text{H}]^+$  Calcd. for  $[\text{C}_{40}\text{H}_{29}\text{O}_3\text{NAu}]^+$  768.1807, found 768.1807.

**IR** (neat): 3056, 3024, 2923, 2855, 1619, 1579, 1560, 1491, 1430, 1305, 1265, 1241, 908, 732  $\text{cm}^{-1}$ .

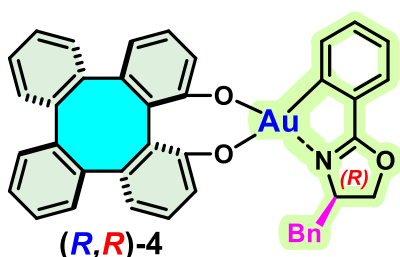

Yellow solid. 66.0 mg, 86% yield. mp 236.0 – 236.7 °C.  $[\alpha]^{20}_{\text{D}}$ : +693.1 ( $c = 1.02$ ,  $\text{CHCl}_3$ ).

**$^1\text{H}$  NMR** (400 MHz,  $\text{CD}_2\text{Cl}_2$ )  $\delta$  8.00 (dd,  $J = 7.9, 1.0$  Hz, 1H), 7.58 (td,  $J = 7.6, 1.7$  Hz, 1H), 7.44 – 7.27 (m, 13H), 7.25 – 7.18 (m, 3H), 7.10 (dt,  $J = 8.4, 7.5$  Hz, 2H), 7.03 (dd,  $J = 8.0, 1.5$  Hz, 1H), 6.91 (dd,  $J = 7.5, 1.3$  Hz, 1H), 6.69 (dd,  $J = 7.3, 1.4$  Hz, 1H), 4.91 – 4.70 (m, 3H), 3.79 (dd,  $J = 13.9, 2.5$  Hz, 1H), 3.46 – 3.30 (m, 1H).

**$^{13}\text{C}$  NMR** (100 MHz,  $\text{CD}_2\text{Cl}_2$ )  $\delta$  180.65, 160.01, 159.98, 144.40, 143.58, 143.11, 142.57, 141.95, 141.73, 141.23, 134.93, 134.29, 134.01, 131.90, 129.84, 129.00, 128.96, 128.68, 128.55, 128.48, 128.19, 127.88, 127.85, 127.48, 127.34, 127.15, 127.12, 126.89, 126.83, 124.32, 121.76, 120.86, 120.74, 76.34, 62.12, 38.82.

**DEPT135  $^{13}\text{C}$  NMR** (100 MHz,  $\text{CD}_2\text{Cl}_2$ )  $\delta$  134.29, 129.84, 129.00, 128.96, 128.68, 128.55, 128.48, 128.19, 127.88, 127.85, 127.48, 127.34, 127.15, 127.12, 126.90, 124.32, 121.77, 120.86, 120.74, 76.34, 62.12, 38.82.

**HRMS (ESI):**  $[\text{M}+\text{H}]^+$  Calcd. for  $[\text{C}_{40}\text{H}_{29}\text{O}_3\text{NAu}]^+$  768.1807, found 768.1809.

**IR** (neat): 3058, 3024, 2928, 2855, 1618, 1578, 1559, 1491, 1430, 1305, 1266, 1242, 908, 731  $\text{cm}^{-1}$ .

## SUPPORTING INFORMATION

### Procedure for Methoxymethylation and Borylation of (*S*)-DHTP

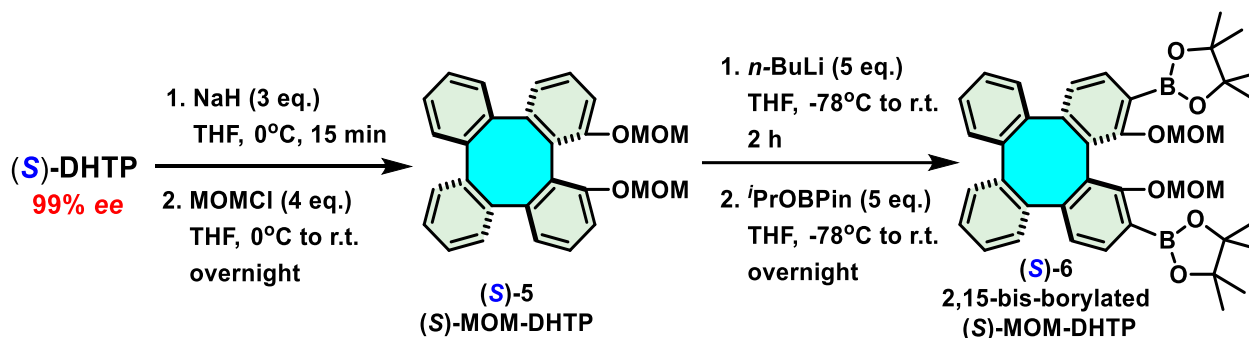

To a suspension of NaH (60% in mineral oil, 2.4 g, 60 mmol) in dry THF (150 mL), enantiopure (*S*)-**DHTP** (6.72 g, 20 mmol) was added under Argon atmosphere at 0 °C. After being stirred for 15 min, chloromethyl methyl ether (6.1 mL, 80 mmol) was added dropwise. The resulting mixture was slowly warmed to room temperature (25 °C) and stirred overnight. The reaction was quenched with ice water (100 mL), and then THF was removed by evaporation. The residual aqueous layer was extracted with CH<sub>2</sub>Cl<sub>2</sub> (150 mL × 3). The combined organic phase was concentrated under reduced pressure. The residue was purified by column chromatography on silica gel (CH<sub>2</sub>Cl<sub>2</sub>/EtOAc/hexane 1:1:10) to give 1,16-*bis*(methoxymethoxy)tetraphenylene [(*S*)-**5**] as a white solid (8.06 g, 95% yield).

To a solution of (*S*)-**5** (8.48 g, 20 mmol) in dry THF (350 mL) was added 1.6 M *n*-BuLi in hexane (62.5 mL, 100 mmol, 5 eq.). The solution was stirred for 2 h at room temperature (25 °C). The resulting suspension was cooled to -78 °C, and 2-isopropyl-4,4,5,5-tetramethyl-1,3,2-dioxabrolane (20.4 mL, 100 mmol) was added *via* syringe over a period of 20 min. The solution was allowed to warm to room temperature and stirred overnight. The reaction mixture was cooled to 0 °C, H<sub>2</sub>O (150 mL) was added, and the reaction mixture was stirred for 1 h. The THF was removed by evaporation. The residual aqueous layer was extracted with CH<sub>2</sub>Cl<sub>2</sub> (200 mL × 3). The combined organic phase was concentrated under reduced pressure. The residue was purified by column chromatography on silica gel (CH<sub>2</sub>Cl<sub>2</sub>/EtOAc/hexane 1:1:6) to give (*S*)-**6** as white solid (12.17 g, 90% yield).

## SUPPORTING INFORMATION

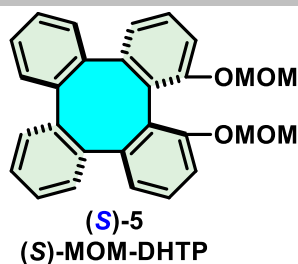

White solid. 8.06 g, 95% yield.

$^1\text{H NMR}$  (600 MHz,  $\text{CD}_2\text{Cl}_2$ )  $\delta$  7.37 – 7.31 (m, 2H), 7.30 – 7.24 (m, 2H), 7.20 – 7.14 (m, 1H), 7.10 (d,  $J$  = 8.3 Hz, 1H), 6.89 (d,  $J$  = 7.6 Hz, 1H), 5.07 (d,  $J$  = 6.6 Hz, 1H), 4.96 (d,  $J$  = 6.5 Hz, 1H), 3.31 (s, 3H).

$^{13}\text{C NMR}$  (150 MHz,  $\text{CD}_2\text{Cl}_2$ )  $\delta$  154.41, 143.40, 141.45, 141.36, 128.96, 128.23, 128.04, 127.33, 127.29, 127.15, 122.87, 114.09, 95.19, 55.60.

**HRMS (ESI):**  $[\text{M}+\text{Na}]^+$  Calcd. for  $[\text{C}_{28}\text{H}_{24}\text{NaO}_4]^+$  447.1567, found 447.1568.

**HPLC:** Daicel Chiralpak<sup>®</sup> AD-H, 3%  $i$ PrOH, 97% hexane, 0.7 mL/min, 30 °C, 254 nm; >99% *ee* ( $t_R$  (major) = 8.25 min).

### Racemic

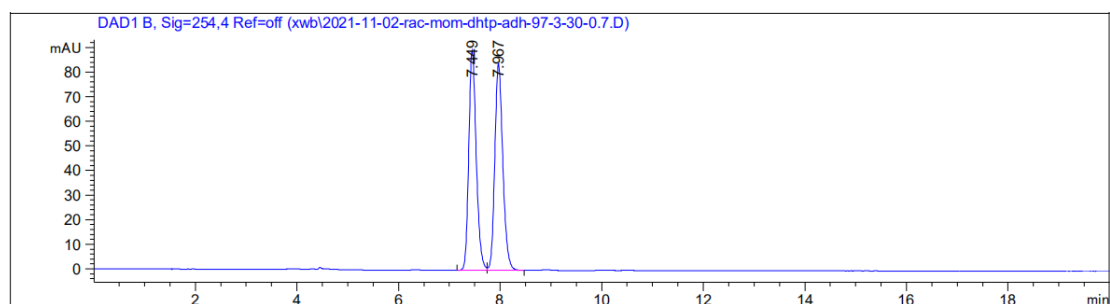

Signal 2: DAD1 B, Sig=254,4 Ref=off

| Peak # | RetTime [min] | Type | Width [min] | Area [mAU*s] | Height [mAU] | Area %  |
|--------|---------------|------|-------------|--------------|--------------|---------|
| 1      | 7.449         | BV   | 0.1575      | 914.72015    | 89.31101     | 49.9080 |
| 2      | 7.967         | VB   | 0.1675      | 918.09406    | 84.01053     | 50.0920 |

Totals : 1832.81421 173.32154

### Enantioenriched

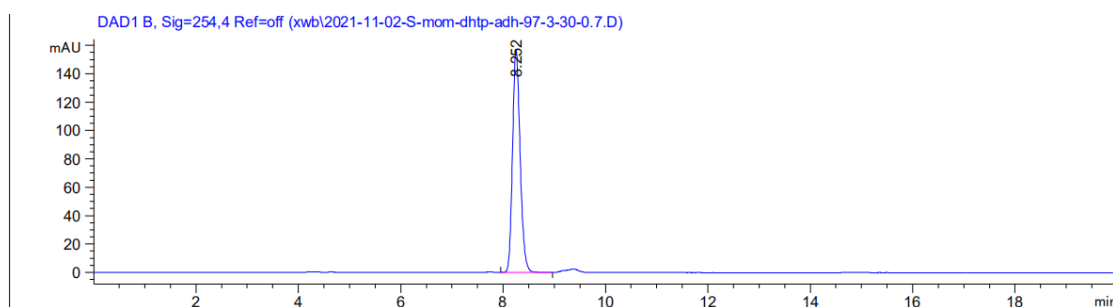

## SUPPORTING INFORMATION

Signal 2: DAD1 B, Sig=254,4 Ref=off

| Peak # | RetTime [min] | Type | Width [min] | Area [mAU*s] | Height [mAU] | Area %   |
|--------|---------------|------|-------------|--------------|--------------|----------|
| 1      | 8.252         | BB   | 0.1579      | 1611.13196   | 156.79631    | 100.0000 |

Totals : 1611.13196 156.79631

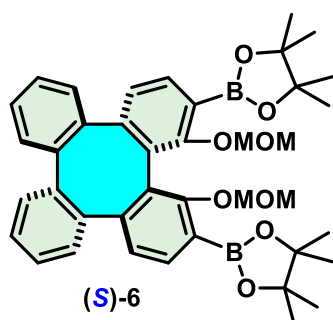

White solid. 12.17 g, 90% yield. mp 110.5 – 111.2 °C.  $[\alpha]_D^{25}$ :  $-17.1$  ( $c = 1.0$ ,  $\text{CHCl}_3$ ).

$^1\text{H NMR}$  (600 MHz,  $\text{CD}_2\text{Cl}_2$ )  $\delta$  7.69 (d,  $J = 7.6$  Hz, 1H), 7.37 – 7.33 (m, 2H), 7.28 – 7.25 (m, 1H), 7.20 – 7.17 (m, 1H), 7.01 (d,  $J = 7.6$  Hz, 1H), 4.83 (d,  $J = 6.0$  Hz, 1H), 4.53 (d,  $J = 6.0$  Hz, 1H), 2.84 (s, 3H), 1.36 (s, 6H), 1.36 (s, 6H).

$^{13}\text{C NMR}$  (150 MHz,  $\text{CD}_2\text{Cl}_2$ )  $\delta$  160.62, 146.76, 141.32, 141.16, 135.84, 131.44, 129.05, 128.59, 127.48, 127.25, 124.69, 100.66, 83.59, 55.96, 24.62, 24.53.

**HRMS (ESI):**  $[\text{M}+\text{Na}]^+$  Calcd. for  $[\text{C}_{40}\text{H}_{46}\text{B}_2\text{O}_8\text{Na}]^+$  699.3271, found 699.3278.

**IR** (neat): 3063, 2979, 2928, 2823, 1595, 1467, 1360, 1308, 1218, 1140, 1063, 968, 858, 762, 667  $\text{cm}^{-1}$ .

**HPLC:** Daicel Chiralpak<sup>®</sup> AD-H, 1%  $i$ PrOH, 99% hexane, 0.7 mL/min, 35 °C, 254 nm; >99% *ee* ( $t_R$  (major) = 9.78 min).

### Racemic

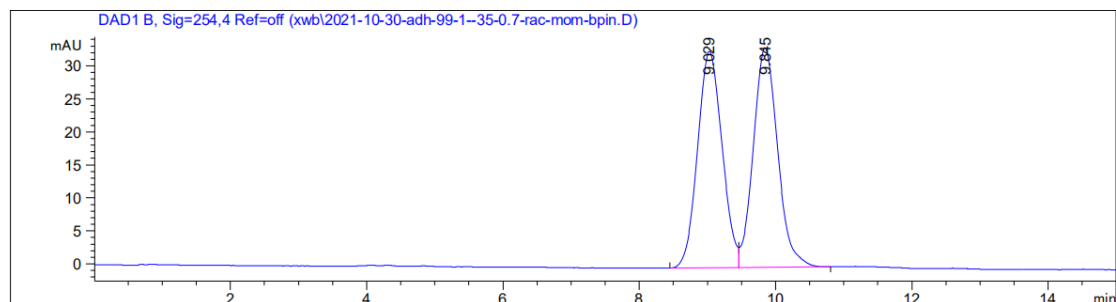

## SUPPORTING INFORMATION

Signal 2: DAD1 B, Sig=254,4 Ref=off

| Peak #   | RetTime [min] | Type | Width [min] | Area [mAU*s] | Height [mAU] | Area %  |
|----------|---------------|------|-------------|--------------|--------------|---------|
| 1        | 9.029         | BV   | 0.3858      | 820.03979    | 32.78717     | 49.7838 |
| 2        | 9.845         | VB   | 0.3861      | 827.16260    | 33.26366     | 50.2162 |
| Totals : |               |      |             | 1647.20239   | 66.05083     |         |

### *Enantioenriched*

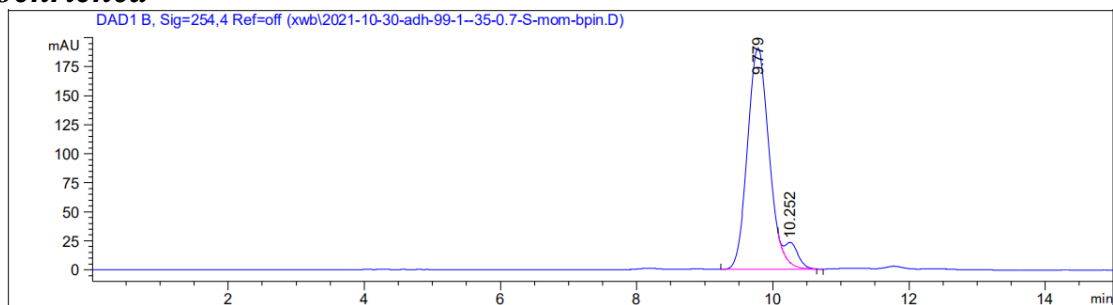

Signal 2: DAD1 B, Sig=254,4 Ref=off

| Peak #   | RetTime [min] | Type | Width [min] | Area [mAU*s] | Height [mAU] | Area %  |
|----------|---------------|------|-------------|--------------|--------------|---------|
| 1        | 9.779         | BV R | 0.3445      | 4225.39648   | 190.69658    | 94.7313 |
| 2        | 10.252        | VB E | 0.2028      | 235.00377    | 17.26702     | 5.2687  |
| Totals : |               |      |             | 4460.40025   | 207.96360    |         |

## SUPPORTING INFORMATION

### General Procedure for Synthesis of 2,15-diaryl DHTPs

#### 1) Standard Procedure:

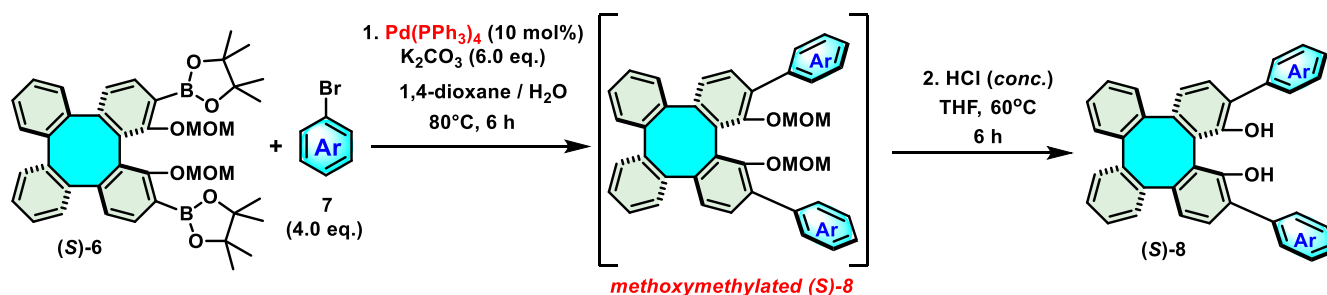

To a Schlenk flask were added (S)-6 (1 mmol, 1.0 eq.), aryl bromine 7 (4.0 eq.),  $\text{Pd}(\text{PPh}_3)_4$  (10 mol%),  $\text{K}_2\text{CO}_3$  (6.0 eq.), 1,4-dioxane (16 mL) and  $\text{H}_2\text{O}$  (4 mL). The mixture was degassed and refilled with Ar three times. The mixture was heated at  $80^\circ\text{C}$  for 6 h. After cooling to room temperature ( $25^\circ\text{C}$ ), the mixture was diluted with  $\text{H}_2\text{O}$  (30 ml), and the aqueous layer was extracted with  $\text{CH}_2\text{Cl}_2$  ( $50\text{ mL} \times 3$ ). The combined organic phase was concentrated under reduced pressure. The residue was purified by flash chromatography on silica gel ( $\text{CH}_2\text{Cl}_2$ /hexane or EtOAc/hexane) to give the corresponding precursor, methoxymethylated (S)-8.

The obtained methoxymethylated (S)-8 was dissolved in THF (10 mL) followed by the addition of concentrated HCl (37% w/w, 2 mL). The mixture was heated at  $60^\circ\text{C}$  for 6 h (or 24 h). The solvents were removed under reduced pressure, and the resulting residue was dissolved in  $\text{CH}_2\text{Cl}_2$ . This organic phase was washed with saturated aqueous  $\text{NaHCO}_3$ , and concentrated under reduced pressure. The residue was purified by flash chromatography on silica gel (EtOAc/hexane or EtOAc/hexane) to give the corresponding 2,15-diaryl DHTP (S)-8.



## SUPPORTING INFORMATION

### 2) Modified Procedure [for (S)-8s and (S)-8t]:

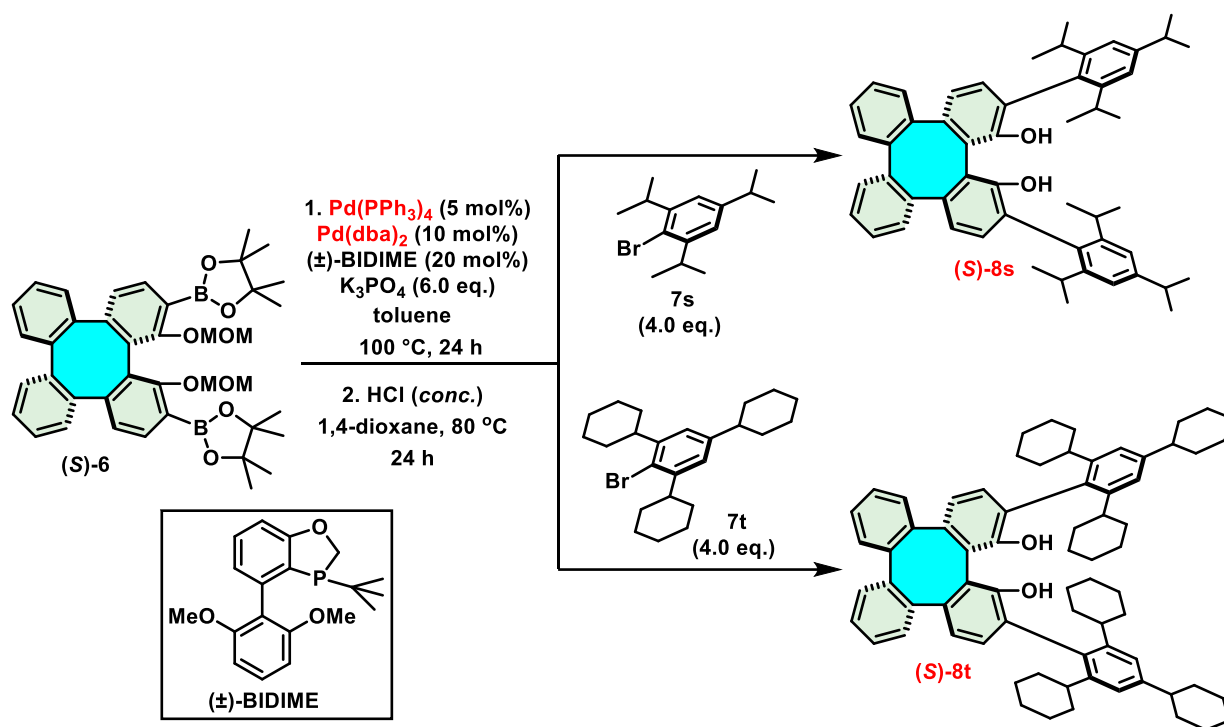

To a Schlenk flask were added (S)-6 (1 mmol, 1.0 eq.), aryl bromine **7** (4.0 eq.), Pd(PPh<sub>3</sub>)<sub>4</sub> (5 mol%), Pd(dba)<sub>2</sub> (10 mol%), (±)-BIDIME (20 mol%), K<sub>3</sub>PO<sub>4</sub> (6.0 eq.), dry toluene (20 mL). The mixture was degassed and refilled with Ar three times. The mixture was heated at 100 °C for 24 h. After cooling to room temperature (25 °C), the mixture was diluted with H<sub>2</sub>O (30 ml), and the aqueous layer was extracted with CH<sub>2</sub>Cl<sub>2</sub> (50 mL × 3). The combined organic phase was concentrated under reduced pressure. The residue was purified by flash chromatography on silica gel (CH<sub>2</sub>Cl<sub>2</sub>/hexane) to give the corresponding precursor, *methoxymethylated* (S)-8.

The obtained methoxymethylated (S)-8 was dissolved in 1,4-dioxane (10 mL) followed by the addition of concentrated HCl (37% w/w, 2 mL). The mixture was heated at 80 °C for 24 h. The solvents were removed under reduced pressure, and the resulting residue was dissolved in CH<sub>2</sub>Cl<sub>2</sub>. This organic phase was washed with saturated aqueous NaHCO<sub>3</sub>, and concentrated under reduced pressure. The residue was purified by flash chromatography on silica gel (EtOAc/hexane) to give the corresponding 2,15-diaryl **DHTP** (S)-8.

*Compounds (±)-8 for HPLC determination were prepared by using racemic (±)-6 to instead of (S)-6 under the above standard conditions and modified conditions.*

## SUPPORTING INFORMATION

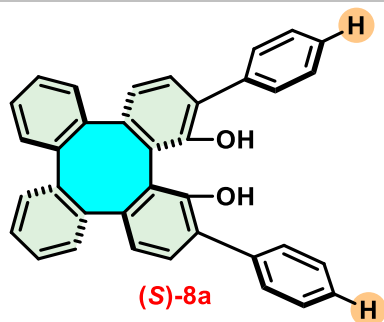

White solid. 439.6 mg, 90% yield. mp 150.0 – 151.5 °C.  $[\alpha]_D^{25}$ : +190.2 ( $c = 1.0$ ,  $\text{CHCl}_3$ ).

$^1\text{H NMR}$  (600 MHz,  $\text{CDCl}_3$ )  $\delta$  7.51 (d,  $J = 7.2$  Hz, 2H), 7.40 (t,  $J = 7.7$  Hz, 2H), 7.34 – 7.29 (m, 4H), 7.27 (d,  $J = 7.8$  Hz, 1H), 7.19 – 7.15 (m, 1H), 6.90 (d,  $J = 7.8$  Hz, 1H), 5.27 (s, 1H).

$^{13}\text{C NMR}$  (150 MHz,  $\text{CDCl}_3$ )  $\delta$  149.16, 143.74, 141.44, 141.01, 137.30, 130.48, 129.34, 129.28, 128.62, 128.19, 127.58, 127.50, 127.41, 127.30, 122.20, 121.74.

**HRMS (ESI):**  $[\text{M}+\text{H}]^+$  Calcd. for  $[\text{C}_{36}\text{H}_{25}\text{O}_2]^+$  489.1850, found 489.1850.

**IR** (neat): 3532, 3058, 3019, 2925, 2852, 1467, 1417, 1219, 1183, 906, 751, 700  $\text{cm}^{-1}$ .

**HPLC:** Daicel Chiralpak<sup>®</sup> AD-H, 20% *i*PrOH, 80% hexane, 0.7 mL/min, 30 °C, 254 nm; 99% *ee* ( $t_{\text{R}}$  (major) = 9.64 min,  $t_{\text{R}}$ (minor) = 8.04 min).

### Racemic

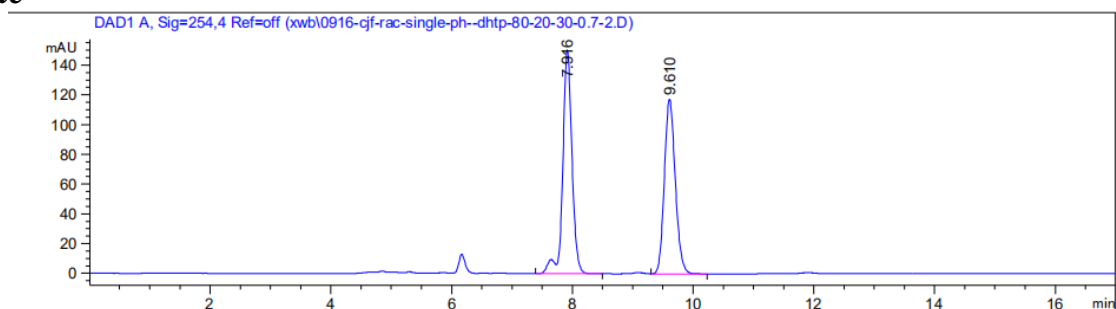

Signal 1: DAD1 A, Sig=254,4 Ref=off

| Peak # | RetTime [min] | Type | Width [min] | Area [mAU*s] | Height [mAU] | Area %  |
|--------|---------------|------|-------------|--------------|--------------|---------|
| 1      | 7.916         | VB R | 0.1542      | 1604.34961   | 150.30582    | 52.0873 |
| 2      | 9.610         | VB   | 0.1947      | 1475.76526   | 117.40374    | 47.9127 |

### Enantioenriched

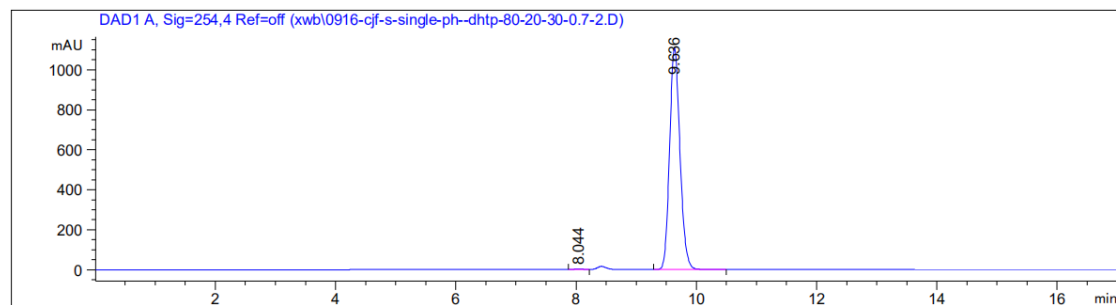

## SUPPORTING INFORMATION

| Peak # | RetTime [min] | Type | Width [min] | Area [mAU*s] | Height [mAU] | Area %  |
|--------|---------------|------|-------------|--------------|--------------|---------|
| 1      | 8.044         | BV   | 0.1462      | 31.53606     | 3.33837      | 0.2369  |
| 2      | 9.636         | BB   | 0.1856      | 1.32782e4    | 1109.50366   | 99.7631 |

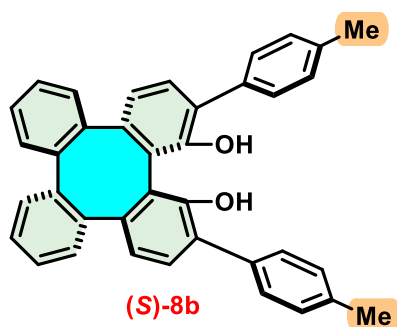

White solid. 418.6 mg, 81% yield. mp 147.7 – 149.8 °C.  $[\alpha]_D^{25}$ : +194.7 ( $c = 1.0$ ,  $\text{CHCl}_3$ ).

$^1\text{H NMR}$  (600 MHz,  $\text{CDCl}_3$ )  $\delta$  7.39 (d,  $J = 8.0$  Hz, 2H), 7.32 – 7.27 (m, 3H), 7.25 – 7.19 (m, 3H), 7.18 – 7.14 (m, 1H), 6.87 (d,  $J = 7.8$  Hz, 1H), 5.27 (s, 1H), 2.35 (s, 3H).

$^{13}\text{C NMR}$  (150 MHz,  $\text{CDCl}_3$ )  $\delta$  149.21, 143.49, 141.50, 141.14, 137.28, 134.35, 130.34, 129.39, 129.33, 129.15, 128.25, 127.54, 127.40, 127.28, 122.15, 121.83, 21.23.

**HRMS (ESI):**  $[\text{M}+\text{Na}]^+$  Calcd. for  $[\text{C}_{38}\text{H}_{28}\text{O}_2\text{Na}]^+$  539.1982, found 539.1987.

**IR** (neat): 3531, 3058, 3019, 2917, 2857, 1468, 1429, 1387, 1184, 906, 815, 750  $\text{cm}^{-1}$ .

**HPLC:** Daicel Chiralpak<sup>®</sup> AD-H, 20% *i*PrOH, 80% hexane, 0.7 mL/min, 30 °C, 254 nm; 99% *ee* ( $t_R$  (major) = 9.01 min,  $t_R$ (minor) = 7.33 min).

### Racemic

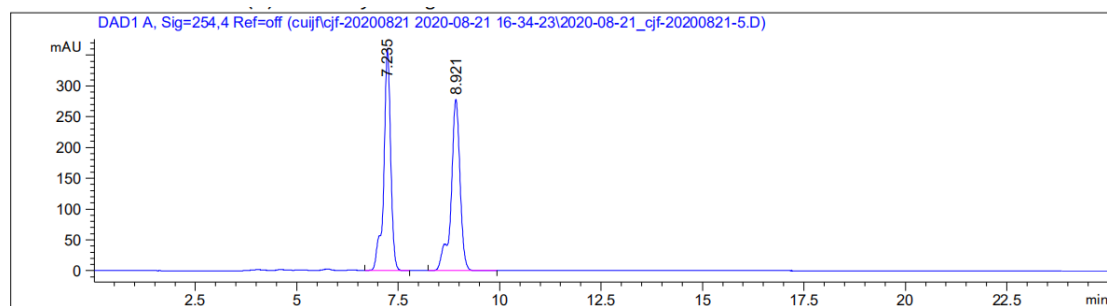

Signal 1: DAD1 A, Sig=254,4 Ref=off

| Peak # | RetTime [min] | Type | Width [min] | Area [mAU*s] | Height [mAU] | Area %  |
|--------|---------------|------|-------------|--------------|--------------|---------|
| 1      | 7.235         | VB R | 0.1781      | 4301.55078   | 358.21835    | 49.9712 |
| 2      | 8.921         | VB R | 0.2198      | 4306.51709   | 277.80750    | 50.0288 |

Totals : 8608.06787 636.02585

# SUPPORTING INFORMATION

## Enantioenriched

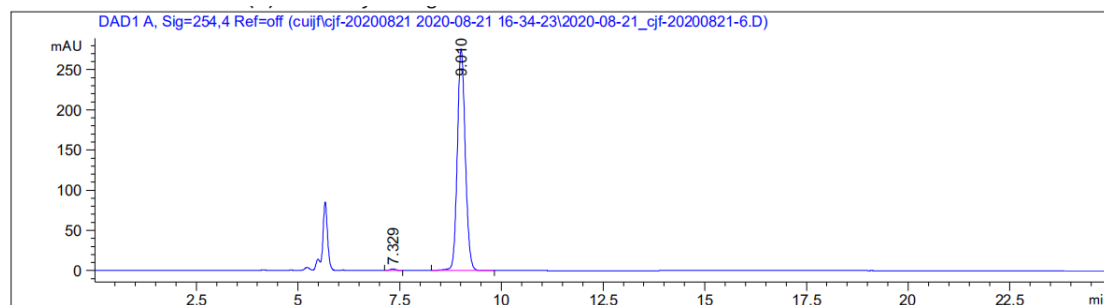

Signal 1: DAD1 A, Sig=254,4 Ref=off

| Peak # | RetTime [min] | Type | Width [min] | Area [mAU*s] | Height [mAU] | Area %  |
|--------|---------------|------|-------------|--------------|--------------|---------|
| 1      | 7.329         | BB   | 0.1579      | 19.59820     | 1.93942      | 0.5170  |
| 2      | 9.010         | BB   | 0.2116      | 3771.25586   | 275.60733    | 99.4830 |

Totals : 3790.85406 277.54675

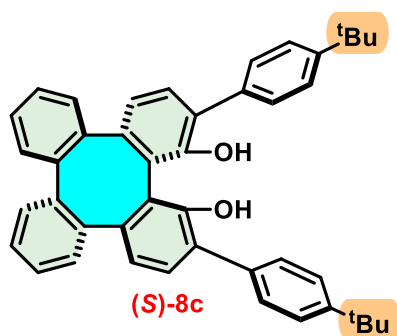

White solid. 510.8 mg, 85% yield. mp 151.2 – 153.6 °C.  $[\alpha]_D^{25}$ : +195.9 ( $c = 1.0$ ,  $\text{CHCl}_3$ ).

$^1\text{H NMR}$  (600 MHz,  $\text{CDCl}_3$ )  $\delta$  7.47 – 7.39 (m, 4H), 7.32 – 7.27 (m, 3H), 7.25 (d,  $J = 7.8$  Hz, 1H), 7.15 (ddd,  $J = 4.7, 3.2, 1.5$  Hz, 1H), 6.87 (d,  $J = 7.9$  Hz, 1H), 5.28 (s, 1H), 1.33 (s, 9H).

$^{13}\text{C NMR}$  (150 MHz,  $\text{CDCl}_3$ )  $\delta$  150.44, 149.25, 143.51, 141.51, 141.14, 134.32, 130.38, 129.33, 128.94, 128.23, 127.54, 127.40, 127.17, 125.62, 122.16, 121.76, 34.63, 31.39.

**HRMS (ESI):**  $[\text{M}+\text{Na}]^+$  Calcd. for  $[\text{C}_{44}\text{H}_{40}\text{O}_2\text{Na}]^+$  623.2921, found 623.2921.

**IR** (neat): 3531, 3056, 3019, 2962, 2902, 2865, 1467, 1432, 1391, 1270, 1220, 1184, 821, 769, 753  $\text{cm}^{-1}$ .

**HPLC:** Daicel Chiralpak<sup>®</sup> AD-H, 10%  $i$ PrOH, 90% hexane, 0.7 mL/min, 30 °C, 254 nm; 99%  $ee$  ( $t_R$  (major) = 7.93 min,  $t_R$ (minor) = 6.80 min).

# SUPPORTING INFORMATION

## Racemic

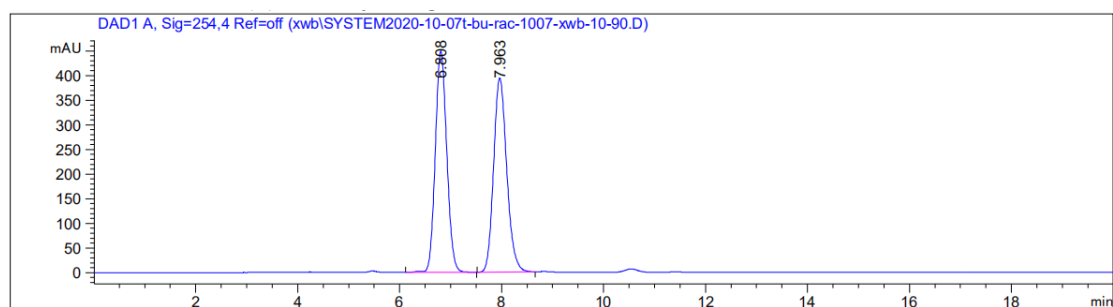

Signal 1: DAD1 A, Sig=254,4 Ref=off

| Peak # | RetTime [min] | Type | Width [min] | Area [mAU*s] | Height [mAU] | Area %  |
|--------|---------------|------|-------------|--------------|--------------|---------|
| 1      | 6.808         | VB R | 0.2440      | 7023.75586   | 448.74326    | 49.8920 |
| 2      | 7.963         | BB   | 0.2767      | 7054.15723   | 394.36621    | 50.1080 |

Totals : 1.40779e4 843.10947

## Enantioenriched

Additional Info : Peak(s) manually integrated

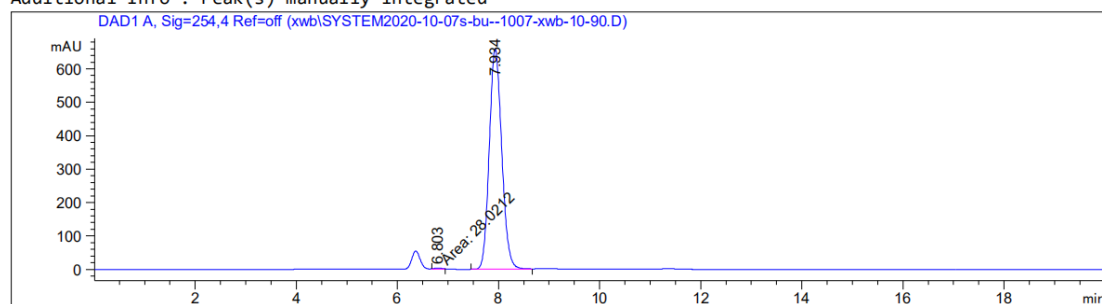

Signal 1: DAD1 A, Sig=254,4 Ref=off

| Peak # | RetTime [min] | Type | Width [min] | Area [mAU*s] | Height [mAU] | Area %  |
|--------|---------------|------|-------------|--------------|--------------|---------|
| 1      | 6.803         | MM   | 0.1841      | 28.02122     | 2.53634      | 0.2477  |
| 2      | 7.934         | BB   | 0.2660      | 1.12859e4    | 658.35449    | 99.7523 |

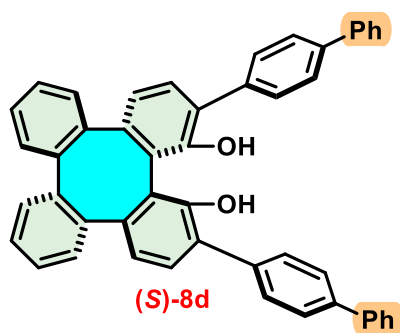

White solid. 538.0 mg, 84% yield. mp 161.0 – 161.5 °C.  $[\alpha]_D^{25}$ : +282.1 ( $c = 1.0$ ,  $\text{CHCl}_3$ ).

## SUPPORTING INFORMATION

$^1\text{H}$  NMR (600 MHz,  $\text{CDCl}_3$ )  $\delta$  7.66 – 7.58 (m, 6H), 7.43 (t,  $J$  = 7.8 Hz, 2H), 7.36 – 7.30 (m, 5H), 7.21 – 7.16 (m, 1H), 6.93 (d,  $J$  = 7.8 Hz, 1H), 5.33 (s, 1H).

$^{13}\text{C}$  NMR (150 MHz,  $\text{CDCl}_3$ )  $\delta$  149.28, 143.88, 141.45, 140.96, 140.73, 140.31, 136.27, 130.53, 129.70, 129.40, 128.83, 128.19, 127.65, 127.47, 127.40, 127.30, 127.12, 126.95, 122.34, 121.64.

**HRMS (ESI):**  $[\text{M}-\text{H}]^-$  Calcd. for  $[\text{C}_{48}\text{H}_{31}\text{O}_2]^-$  639.2330, found 639.2323.

**IR** (neat): 3528, 3061, 3022, 2926, 2853, 1468, 1427, 1387, 1215, 1182, 1088, 906, 824, 752, 698, 667  $\text{cm}^{-1}$ .

**HPLC:** Daicel Chiralpak<sup>®</sup> AD-H, 30% *i*PrOH, 70% hexane, 0.7 mL/min, 30 °C, 254 nm; 99% *ee* ( $t_{\text{R}}$  (major) = 20.46 min,  $t_{\text{R}}$  (minor) = 14.35 min).

### Racemic

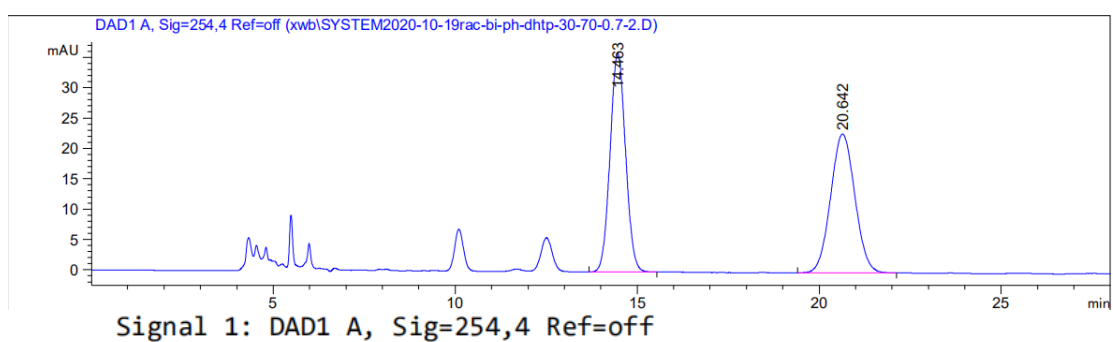

### Enantioenriched

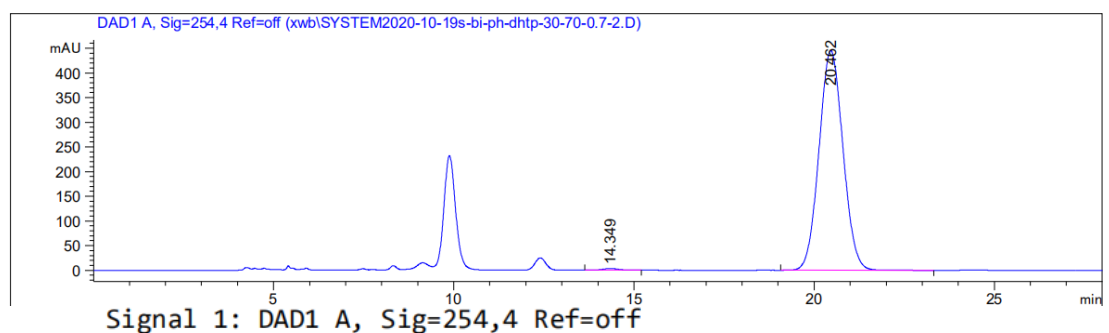

## SUPPORTING INFORMATION

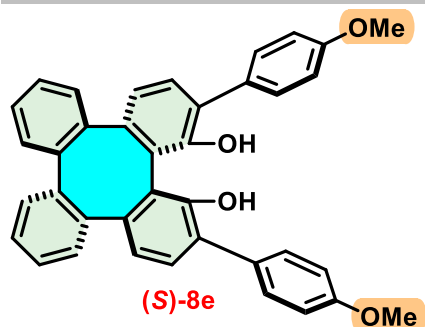

White solid. 422.5 mg, 77% yield. mp 156.3 – 156.7 °C.  $[\alpha]_D^{25}$ : +203.5 ( $c = 1.0$ ,  $\text{CHCl}_3$ ).

$^1\text{H NMR}$  (600 MHz,  $\text{CDCl}_3$ )  $\delta$  7.44 (d,  $J = 8.7$  Hz, 2H), 7.30 (d,  $J = 3.2$  Hz, 3H), 7.23 (d,  $J = 7.8$  Hz, 1H), 7.18 – 7.14 (m, 1H), 6.93 (d,  $J = 8.7$  Hz, 2H), 6.88 (d,  $J = 7.8$  Hz, 1H), 5.25 (s, 1H), 3.81 (s, 3H).

$^{13}\text{C NMR}$  (150 MHz,  $\text{CDCl}_3$ )  $\delta$  159.04, 149.14, 143.29, 141.48, 141.09, 130.43, 130.29, 129.58, 129.32, 128.21, 127.51, 127.37, 126.96, 122.13, 121.69, 114.07, 55.33.

**HRMS (ESI):**  $[\text{M}+\text{H}]^+$  Calcd. for  $[\text{C}_{38}\text{H}_{29}\text{O}_4]^+$  549.2061, found 549.2061.

**IR** (neat): 3525, 3058, 2925, 2850, 1467, 1432, 1245, 1177, 1091, 905, 728, 650  $\text{cm}^{-1}$ .

**HPLC:** Daicel Chiralpak<sup>®</sup> IC, 20%  $i$ PrOH, 80% hexane, 0.7 mL/min, 30 °C, 254 nm; 99% *ee* ( $t_R$  (major) = 11.33 min,  $t_R$ (minor) = 22.01 min).

### Racemic

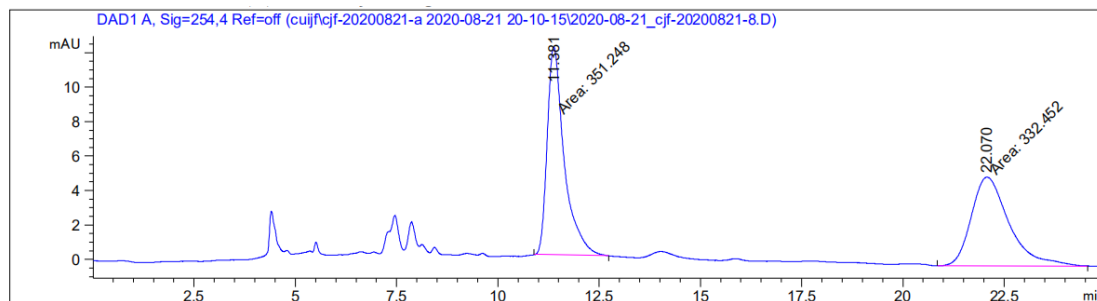

Signal 1: DAD1 A, Sig=254,4 Ref=off

| Peak # | RetTime [min] | Type | Width [min] | Area [mAU*s] | Height [mAU] | Area %  |
|--------|---------------|------|-------------|--------------|--------------|---------|
| 1      | 11.381        | MM   | 0.4862      | 351.24780    | 12.04135     | 51.3746 |
| 2      | 22.070        | MM   | 1.0784      | 332.45181    | 5.13782      | 48.6254 |

Totals : 683.69962 17.17917

# SUPPORTING INFORMATION

## Enantioenriched

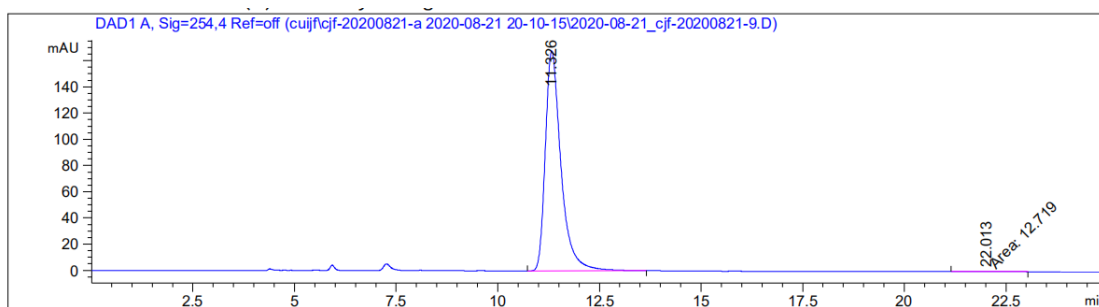

Signal 1: DAD1 A, Sig=254,4 Ref=off

| Peak # | RetTime [min] | Type | Width [min] | Area [mAU*s] | Height [mAU] | Area %  |
|--------|---------------|------|-------------|--------------|--------------|---------|
| 1      | 11.326        | BB   | 0.4055      | 4509.01758   | 167.79710    | 99.7187 |
| 2      | 22.013        | MM   | 0.8218      | 12.71899     | 2.57959e-1   | 0.2813  |

Totals :                                      4521.73657    168.05506

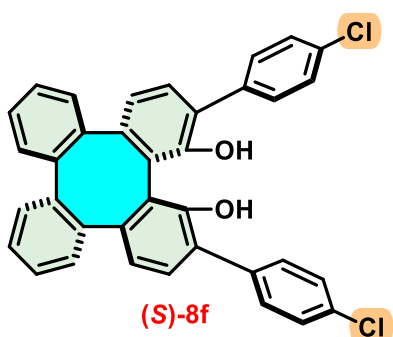

White solid. 451.2 mg, 81% yield. mp 151.6 – 152.9 °C.  $[\alpha]_{\text{D}}^{25}$ : +197.6 ( $c = 1.0$ ,  $\text{CHCl}_3$ ).

$^1\text{H NMR}$  (400 MHz,  $\text{CDCl}_3$ )  $\delta$  7.45 (d,  $J = 8.2$  Hz, 2H), 7.35 (d,  $J = 8.2$  Hz, 2H), 7.33 – 7.27 (m, 3H), 7.24 (s, 1H), 7.19 – 7.12 (m, 1H), 6.91 (d,  $J = 7.8$  Hz, 1H), 5.18 (s, 1H).

$^{13}\text{C NMR}$  (100 MHz,  $\text{CDCl}_3$ )  $\delta$  149.11, 144.19, 141.33, 140.66, 135.71, 133.45, 130.68, 130.65, 129.46, 128.65, 128.09, 127.76, 127.52, 126.27, 122.46, 121.27.

**HRMS (ESI)**:  $[\text{M}-\text{H}]^-$  Calcd. for  $[\text{C}_{36}\text{H}_{21}\text{Cl}_2\text{O}_2]^-$  555.0924, found 555.0925.

**IR** (neat): 3528, 3058, 3016, 2925, 1468, 1432, 1387, 1215, 1183, 1093, 1014, 819, 751, 668  $\text{cm}^{-1}$ .

**HPLC**: Daicel Chiralpak® AD-H, 20%  $i$ PrOH, 80% hexane, 0.7 mL/min, 30 °C, 254 nm; 98% *ee* ( $t_{\text{R}}$  (major) = 9.83 min,  $t_{\text{R}}$ (minor) = 7.18 min).



# SUPPORTING INFORMATION

## Racemic

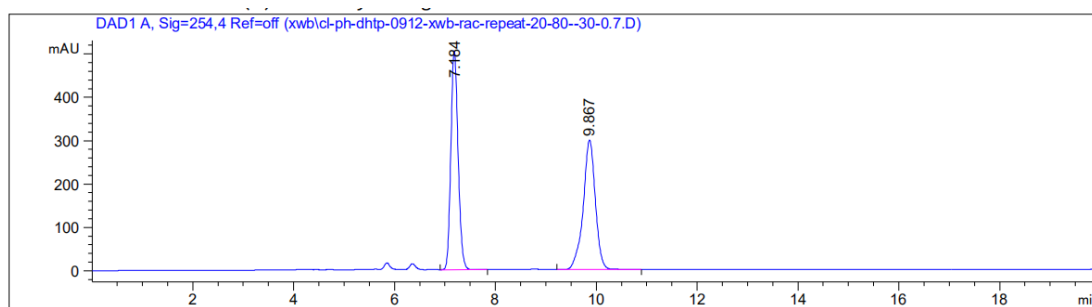

Signal 1: DAD1 A, Sig=254,4 Ref=off

| Peak # | RetTime [min] | Type | Width [min] | Area [mAU*s] | Height [mAU] | Area %  |
|--------|---------------|------|-------------|--------------|--------------|---------|
| 1      | 7.184         | BB   | 0.1545      | 5034.10840   | 504.10718    | 50.1169 |
| 2      | 9.867         | BB   | 0.2515      | 5010.61572   | 299.04016    | 49.8831 |

## Enantioenriched

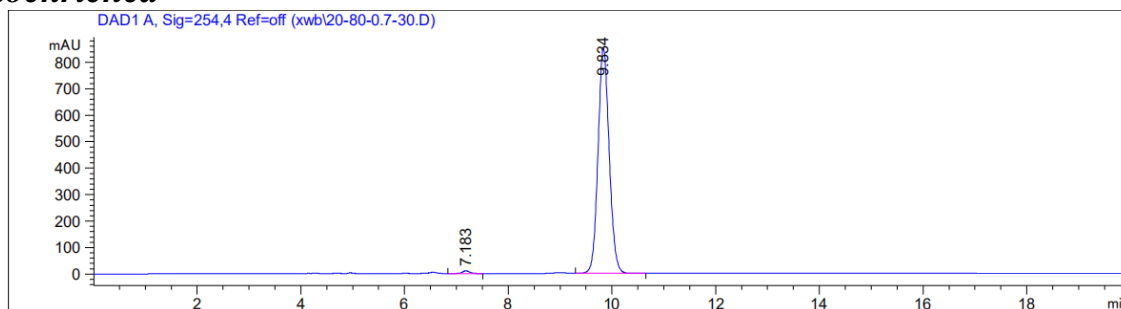

Signal 1: DAD1 A, Sig=254,4 Ref=off

| Peak # | RetTime [min] | Type | Width [min] | Area [mAU*s] | Height [mAU] | Area %  |
|--------|---------------|------|-------------|--------------|--------------|---------|
| 1      | 7.183         | BB   | 0.1506      | 98.24131     | 10.00159     | 0.7642  |
| 2      | 9.834         | BB   | 0.2310      | 1.27566e4    | 850.65540    | 99.2358 |

Totals : 1.28548e4 860.65698

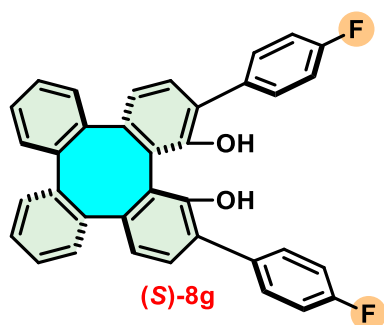

White solid. 393.1 mg, 75% yield. mp 128.0 – 128.5 °C.  $[\alpha]_{\text{D}}^{25}$ : +171.8 ( $c = 1.0$ ,  $\text{CHCl}_3$ ).

## SUPPORTING INFORMATION

$^1\text{H}$  NMR (400 MHz,  $\text{CDCl}_3$ )  $\delta$  7.53 – 7.46 (m, 2H), 7.35 – 7.28 (m, 3H), 7.25 (d,  $J = 4.4$  Hz, 1H), 7.19 – 7.14 (m, 1H), 7.13 – 7.04 (m, 2H), 6.91 (d,  $J = 7.8$  Hz, 1H), 5.18 (s, 1H).

$^{13}\text{C}$  NMR (100 MHz,  $\text{CDCl}_3$ )  $\delta$  162.25 (d,  $J = 246.8$  Hz), 149.09, 143.92, 141.37, 140.75, 133.20 (d,  $J = 3.3$  Hz), 130.99 (d,  $J = 8.0$  Hz), 130.67, 129.42, 128.10, 127.69, 127.47, 126.43, 122.35, 121.34, 115.41 (d,  $J = 21.3$  Hz).

$^{19}\text{F}$  NMR (376 MHz,  $\text{CDCl}_3$ )  $\delta$  -114.79.

HRMS (ESI):  $[\text{M}-\text{H}]^-$  Calcd. for  $[\text{C}_{36}\text{H}_{21}\text{F}_2\text{O}_2]^-$  523.1515, found 523.1512.

IR (neat): 3530, 3061, 3017, 2928, 2857, 1517, 1468, 1432, 1384, 1227, 1184, 1160, 908, 822, 750  $\text{cm}^{-1}$ .

HPLC: Daicel Chiralpak<sup>®</sup> AD-H, 20%  $i$ PrOH, 80% hexane, 0.7 mL/min, 30  $^\circ\text{C}$ , 254 nm; 98% *ee* ( $t_{\text{R}}$  (major) = 9.07 min,  $t_{\text{R}}$ (minor) = 6.95 min).

### Racemic

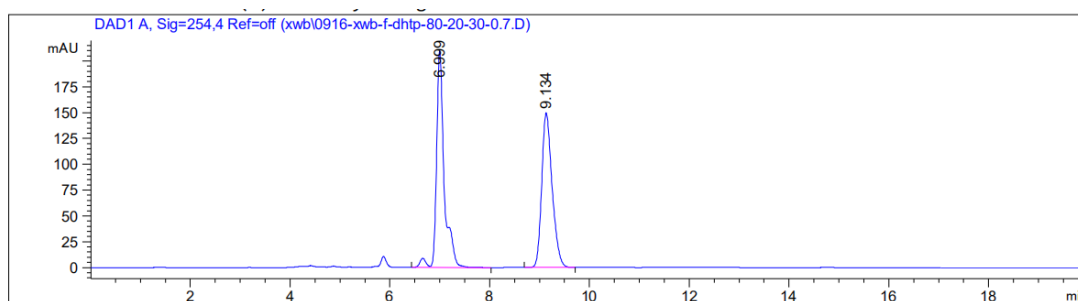

Signal 1: DAD1 A, Sig=254,4 Ref=off

| Peak # | RetTime [min] | Type | Width [min] | Area [mAU*s] | Height [mAU] | Area %  |
|--------|---------------|------|-------------|--------------|--------------|---------|
| 1      | 6.999         | VV R | 0.1517      | 2254.13013   | 209.36095    | 50.9606 |
| 2      | 9.134         | BB   | 0.2191      | 2169.14990   | 149.65433    | 49.0394 |

Totals : 4423.28003 359.01527

### Enantioenriched

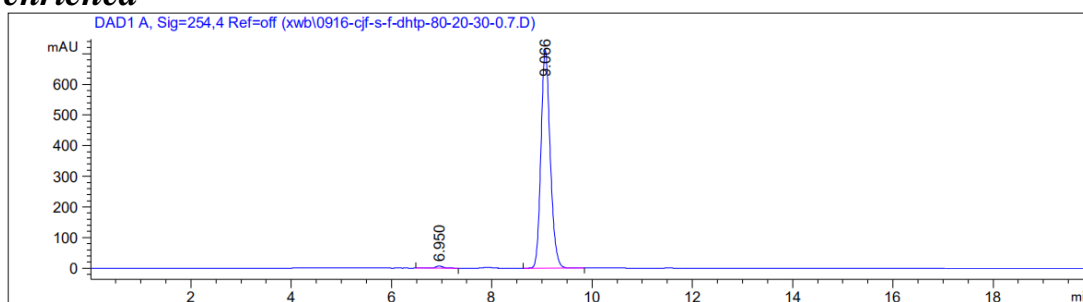

Signal 1: DAD1 A, Sig=254,4 Ref=off

| Peak # | RetTime [min] | Type | Width [min] | Area [mAU*s] | Height [mAU] | Area %  |
|--------|---------------|------|-------------|--------------|--------------|---------|
| 1      | 6.950         | VB R | 0.1442      | 79.14410     | 7.35916      | 0.8597  |
| 2      | 9.066         | BB   | 0.1974      | 9127.18848   | 712.86774    | 99.1403 |

Totals : 9206.33257 720.22690

## SUPPORTING INFORMATION

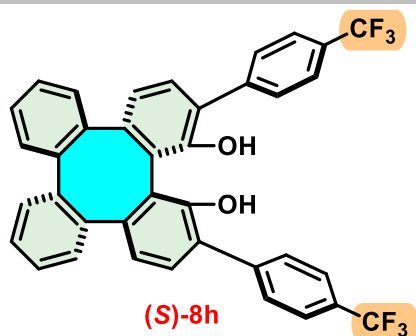

White solid. 437.5 mg, 70% yield. mp 128.3 – 128.5 °C.  $[\alpha]_D^{25}$ : +162.6 ( $c = 1.0$ ,  $\text{CHCl}_3$ ).

$^1\text{H NMR}$  (600 MHz,  $\text{CDCl}_3$ )  $\delta$  7.65 (s, 4H), 7.36 – 7.29 (m, 4H), 7.20 – 7.16 (m, 1H), 6.96 (d,  $J = 7.8$  Hz, 1H), 5.18 (s, 1H).

$^{13}\text{C NMR}$  (150 MHz,  $\text{CDCl}_3$ )  $\delta$  149.20, 144.76, 141.25, 140.96, 140.43, 130.98, 129.65, 129.53, 129.45 (q,  $J = 32.5$  Hz), 128.01, 127.89, 127.58, 126.15, 125.29 (q,  $J = 3.7$  Hz), 124.21 (q,  $J = 271.9$  Hz), 122.65, 121.03.

$^{19}\text{F NMR}$  (565 MHz,  $\text{CDCl}_3$ )  $\delta$  -62.50.

**HRMS (ESI):**  $[\text{M}-\text{H}]^-$  Calcd. for  $[\text{C}_{38}\text{H}_{21}\text{F}_6\text{O}_2]^-$  623.1451, found 623.1451.

**IR** (neat): 538, 3061, 3017, 2930, 2852, 1617, 1386, 1325, 1215, 1167, 1125, 852, 824, 751, 668  $\text{cm}^{-1}$ .

**HPLC:** Daicel Chiralpak<sup>®</sup> AD-H, 20% *i*PrOH, 80% hexane, 0.7 mL/min, 30 °C, 254 nm; 98% *ee* ( $t_R$  (major) = 6.75 min,  $t_R$ (minor) = 5.46 min).

### Racemic

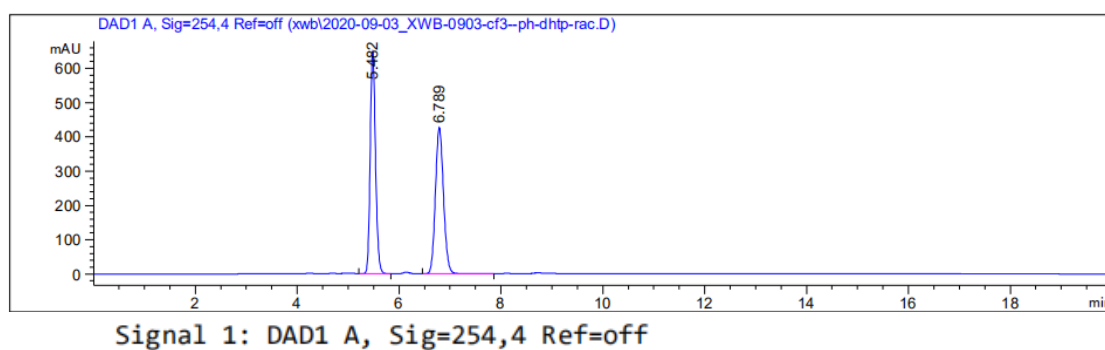

# SUPPORTING INFORMATION

## Enantioenriched

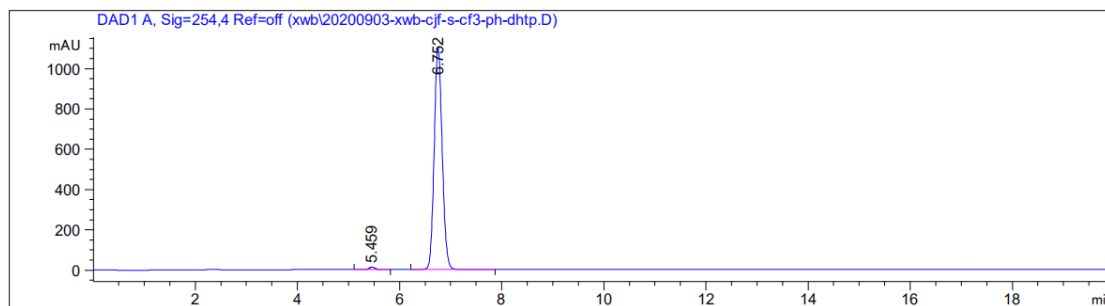

Signal 1: DAD1 A, Sig=254,4 Ref=off

| Peak # | RetTime [min] | Type | Width [min] | Area [mAU*s] | Height [mAU] | Area %  |
|--------|---------------|------|-------------|--------------|--------------|---------|
| 1      | 5.459         | BB   | 0.1199      | 99.67613     | 12.65129     | 0.8217  |
| 2      | 6.752         | BB   | 0.1695      | 1.20312e4    | 1100.59680   | 99.1783 |

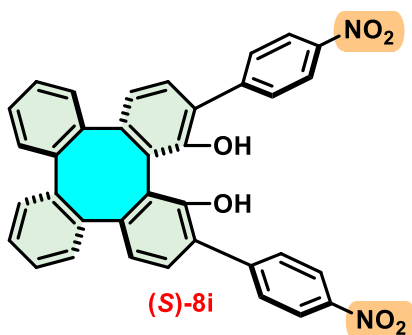

Pale yellow solid. 497.3 mg, 86% yield. mp 281.2 – 281.7 °C.  $[\alpha]_D^{25}$ : +241.3 ( $c = 1.0$ ,  $\text{CHCl}_3$ )

$^1\text{H NMR}$  (600 MHz,  $\text{CDCl}_3$ )  $\delta$  8.20 (d,  $J = 8.8$  Hz, 2H), 7.70 (d,  $J = 8.8$  Hz, 2H), 7.37 – 7.29 (m, 4H), 7.18 (dq,  $J = 7.1, 3.7$  Hz, 1H), 6.99 (d,  $J = 7.9$  Hz, 1H), 5.34 (s, 1H).

$^{13}\text{C NMR}$  (150 MHz,  $\text{CDCl}_3$ )  $\delta$  149.40, 146.83, 145.56, 144.18, 141.13, 140.13, 131.21, 130.18, 129.65, 128.10, 127.94, 127.71, 125.44, 123.48, 122.90, 120.84.

**HRMS (ESI):**  $[\text{M}-\text{H}]^-$  Calcd. for  $[\text{C}_{36}\text{H}_{21}\text{N}_2\text{O}_6]^-$  577.1405, found 577.1399.

**IR** (neat): 3515, 3061, 2928, 1597, 1515, 1435, 1387, 1345, 1220, 1182, 858, 772, 754  $\text{cm}^{-1}$ .

**HPLC:** Daicel Chiralpak<sup>®</sup> AD-H, 30%  $i$ PrOH, 70% hexane, 0.7 mL/min, 30 °C, 254 nm; 98%  $ee$  ( $t_R$  (major) = 16.66 min,  $t_R$ (minor) = 10.47 min).

# SUPPORTING INFORMATION

## Racemic

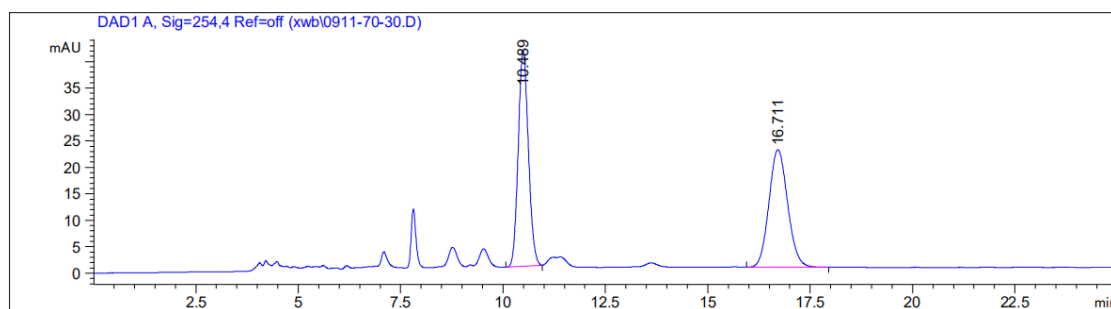

Signal 1: DAD1 A, Sig=254,4 Ref=off

| Peak # | RetTime [min] | Type | Width [min] | Area [mAU*s] | Height [mAU] | Area %  |
|--------|---------------|------|-------------|--------------|--------------|---------|
| 1      | 10.489        | BB   | 0.2672      | 704.39783    | 40.84756     | 49.9107 |
| 2      | 16.711        | BB   | 0.4925      | 706.91888    | 22.25986     | 50.0893 |

## Enantioenriched

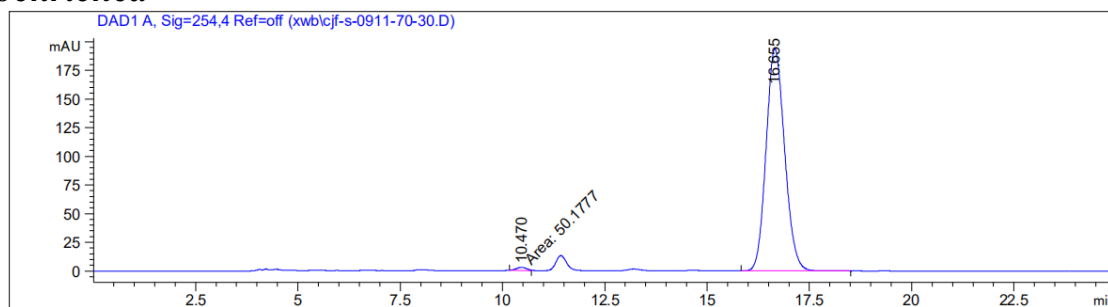

Signal 1: DAD1 A, Sig=254,4 Ref=off

| Peak # | RetTime [min] | Type | Width [min] | Area [mAU*s] | Height [mAU] | Area %  |
|--------|---------------|------|-------------|--------------|--------------|---------|
| 1      | 10.470        | MM   | 0.2931      | 50.17770     | 2.85312      | 0.8140  |
| 2      | 16.655        | BB   | 0.4906      | 6114.48926   | 193.53551    | 99.1860 |

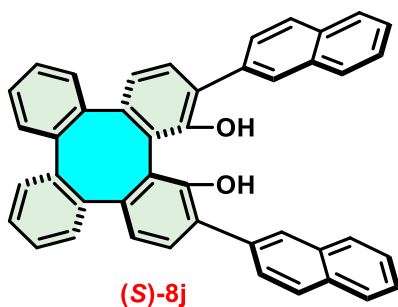

White solid. 447.2 mg, 76% yield. mp 169.2 – 171.1 °C.  $[\alpha]_D^{25}$ : +228.0 ( $c = 0.5$ ,  $\text{CHCl}_3$ ).

## SUPPORTING INFORMATION

**$^1\text{H}$  NMR** (600 MHz,  $\text{CDCl}_3$ )  $\delta$  7.98 (s, 1H), 7.87 (d,  $J = 8.5$  Hz, 1H), 7.82 (ddd,  $J = 9.5, 6.1, 3.4$  Hz, 2H), 7.65 (dd,  $J = 8.5, 1.8$  Hz, 1H), 7.47 (dq,  $J = 6.8, 3.5$  Hz, 2H), 7.38 (d,  $J = 7.8$  Hz, 1H), 7.37 – 7.32 (m, 3H), 7.22 – 7.18 (m, 1H), 6.96 (d,  $J = 7.8$  Hz, 1H), 5.42 (s, 1H).

**$^{13}\text{C}$  NMR** (150 MHz,  $\text{CDCl}_3$ )  $\delta$  149.40, 143.90, 141.47, 141.02, 134.82, 133.49, 132.61, 130.78, 129.39, 128.25, 128.17, 128.11, 127.66, 127.65, 127.47, 127.30, 126.28, 126.16, 122.36, 121.83.

**HRMS (ESI):**  $[\text{M}+\text{H}]^+$  Calcd. for  $[\text{C}_{44}\text{H}_{29}\text{O}_2]^+$  589.2162, found 589.2164.

**IR** (neat): 3530, 3058, 3019, 2928, 2852, 1436, 1228, 906, 818, 731, 650  $\text{cm}^{-1}$ .

**HPLC:** Daicel Chiralpak<sup>®</sup> IC, 10%  $i$ PrOH, 90% hexane, 0.7 mL/min, 30  $^\circ\text{C}$ , 254 nm; >99% *ee* ( $t_{\text{R}}$  (major) = 10.14 min).

### Racemic

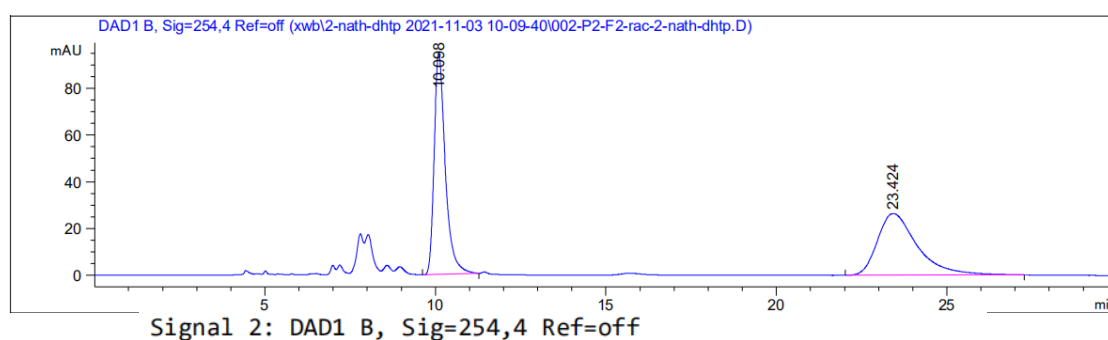

### Enantioenriched

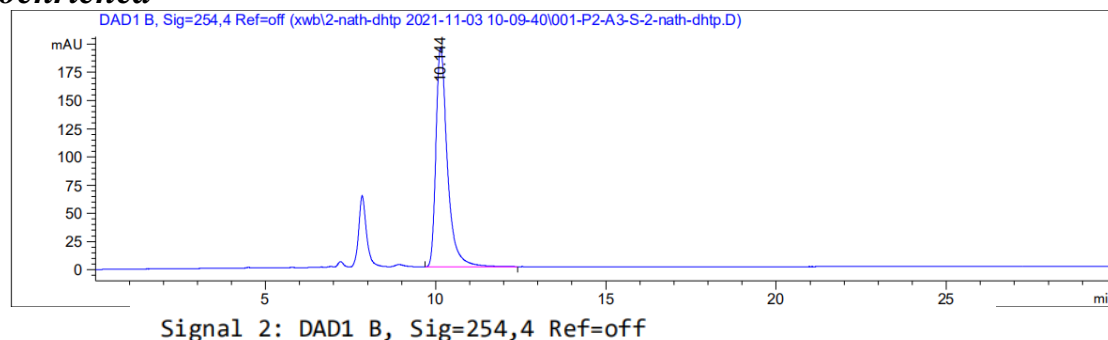

## SUPPORTING INFORMATION

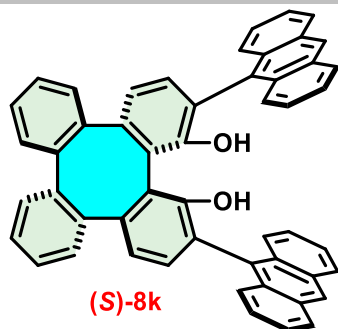

White solid. 496.0 mg, 72% yield. mp 233.8 – 234.0 °C.  $[\alpha]_D^{25}$ : +85.8 ( $c = 1.0$ ,  $\text{CHCl}_3$ ).

$^1\text{H NMR}$  (600 MHz,  $\text{CDCl}_3$ )  $\delta$  8.48 (s, 1H), 8.00 (dd,  $J = 13.5, 8.5$  Hz, 2H), 7.70 (d,  $J = 8.8$  Hz, 1H), 7.52 (d,  $J = 7.3$  Hz, 1H), 7.49 – 7.41 (m, 3H), 7.37 (t,  $J = 7.5$  Hz, 1H), 7.33 (d,  $J = 7.2$  Hz, 1H), 7.28 (t,  $J = 7.6$  Hz, 1H), 7.24 (t,  $J = 7.6$  Hz, 1H), 7.21 – 7.16 (m, 2H), 7.04 (d,  $J = 7.6$  Hz, 1H), 4.78 (s, 1H).

$^{13}\text{C NMR}$  (150 MHz,  $\text{CDCl}_3$ )  $\delta$  150.48, 144.27, 141.75, 141.53, 131.64, 131.55, 131.45, 130.72, 130.59, 130.55, 128.93, 128.52, 128.50, 127.91, 127.58, 127.57, 127.19, 126.19, 126.13, 126.07, 126.01, 125.35, 125.32, 123.38, 123.03, 121.59.

**HRMS (ESI):**  $[\text{M}+\text{H}]^+$  Calcd. for  $[\text{C}_{52}\text{H}_{33}\text{O}_2]^+$  689.2476, found 689.2479.

**IR** (neat): 3513, 3053, 2923, 1558, 1436, 1409, 1310, 1238, 1219, 903, 772, 739  $\text{cm}^{-1}$ .

**HPLC:** Daicel Chiralpak<sup>®</sup> IA, 10%  $i$ PrOH, 90% hexane, 0.7 mL/min, 30 °C, 254 nm; >99% *ee* ( $t_R$  (major) = 8.41 min).

### Racemic

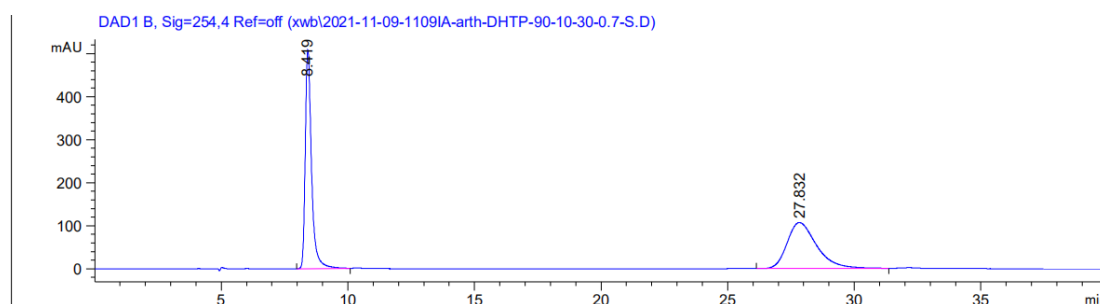

Signal 2: DAD1 B, Sig=254,4 Ref=off

| Peak # | RetTime [min] | Type | Width [min] | Area [mAU*s] | Height [mAU] | Area %  |
|--------|---------------|------|-------------|--------------|--------------|---------|
| 1      | 8.419         | BB   | 0.2600      | 8708.83496   | 507.92249    | 50.2215 |
| 2      | 27.832        | BB   | 1.2154      | 8632.01660   | 106.74400    | 49.7785 |

Totals : 1.73409e4 614.66649

## SUPPORTING INFORMATION

### Enantioenriched

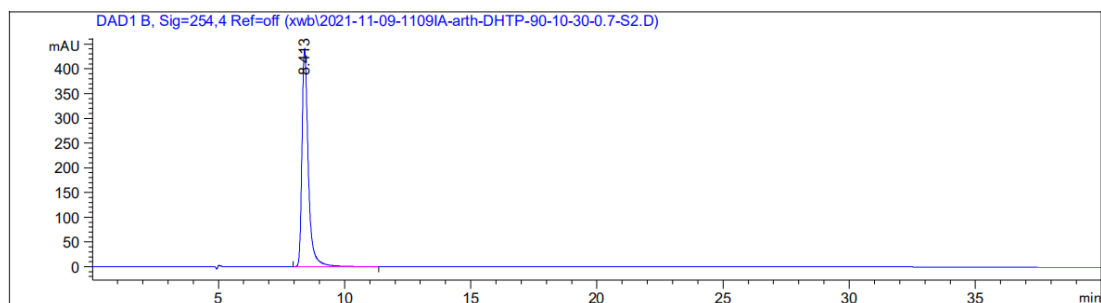

Signal 2: DAD1 B, Sig=254,4 Ref=off

| Peak # | RetTime [min] | Type | Width [min] | Area [mAU*s] | Height [mAU] | Area %   |
|--------|---------------|------|-------------|--------------|--------------|----------|
| 1      | 8.413         | BB   | 0.2625      | 7717.76953   | 440.25717    | 100.0000 |

Totals : 7717.76953 440.25717

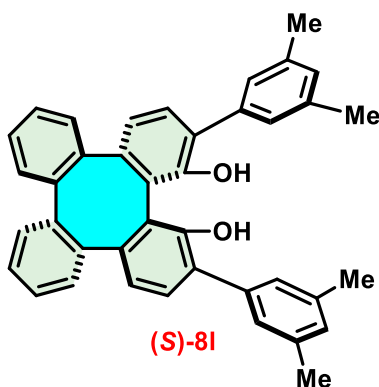

White solid. 490.2 mg, 90% yield. mp 154.0 – 155.3 °C.  $[\alpha]_D^{25}$ : +167.4 ( $c = 0.5$ ,  $\text{CHCl}_3$ ).

$^1\text{H NMR}$  (400 MHz,  $\text{CDCl}_3$ )  $\delta$  7.34 – 7.28 (m, 3H), 7.23 (d,  $J = 7.8$  Hz, 1H), 7.19 – 7.14 (m, 1H), 7.11 (s, 2H), 6.97 (s, 1H), 6.87 (d,  $J = 7.8$  Hz, 1H), 5.32 (s, 1H), 2.32 (s, 6H).

$^{13}\text{C NMR}$  (150 MHz,  $\text{CDCl}_3$ )  $\delta$  149.14, 143.48, 141.50, 141.20, 138.31, 137.16, 130.13, 129.30, 129.23, 128.27, 127.48, 127.42, 127.34, 127.01, 122.01, 21.36.

**HRMS (ESI):**  $[\text{M}+\text{H}]^+$  Calcd. for  $[\text{C}_{40}\text{H}_{33}\text{O}_2]^+$  545.2476, found 545.2479.

**IR** (neat): 3529, 3061, 3017, 2917, 2855, 1601, 1468, 1435, 1393, 1297, 1237, 1215, 1181, 855, 822, 750, 707  $\text{cm}^{-1}$ .

**HPLC:** Daicel Chiralpak<sup>®</sup> AD-H, 10%  $i$ PrOH, 90% hexane, 0.7 mL/min, 30 °C, 254 nm; 98% *ee* ( $t_R$  (major) = 5.57 min,  $t_R$  (minor) = 6.71 min).



# SUPPORTING INFORMATION

## Racemic

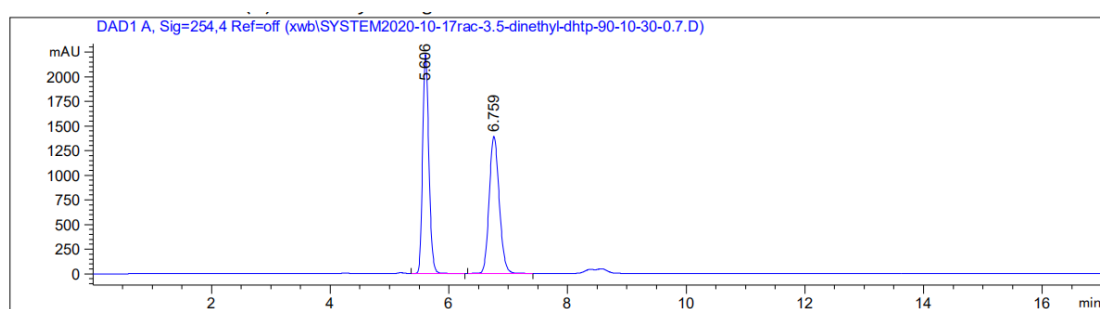

Signal 1: DAD1 A, Sig=254,4 Ref=off

| Peak # | RetTime [min] | Type | Width [min] | Area [mAU*s] | Height [mAU] | Area %  |
|--------|---------------|------|-------------|--------------|--------------|---------|
| 1      | 5.606         | VB   | 0.1131      | 1.62048e4    | 2222.23950   | 49.7188 |
| 2      | 6.759         | VB R | 0.1833      | 1.63881e4    | 1390.87524   | 50.2812 |

## Enantioenriched

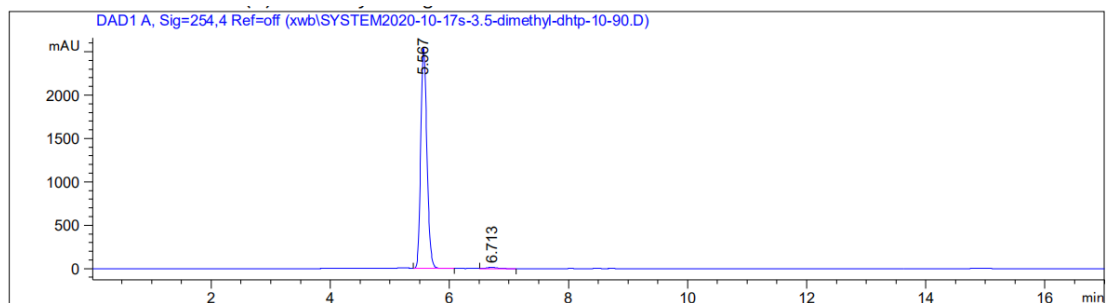

Signal 1: DAD1 A, Sig=254,4 Ref=off

| Peak # | RetTime [min] | Type | Width [min] | Area [mAU*s] | Height [mAU] | Area %  |
|--------|---------------|------|-------------|--------------|--------------|---------|
| 1      | 5.567         | BB   | 0.1102      | 1.82920e4    | 2533.75903   | 99.1458 |
| 2      | 6.713         | VB   | 0.1771      | 157.59810    | 13.81514     | 0.8542  |

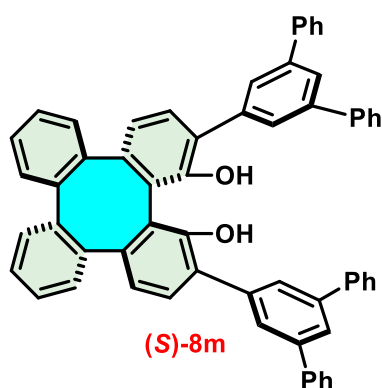

White solid. 618.6 mg, 78% yield. mp 280.2 – 282.0 °C.  $[\alpha]_D^{25}$ : +145.1 ( $c = 1.0$ ,  $\text{CHCl}_3$ ).

## SUPPORTING INFORMATION

$^1\text{H}$  NMR (600 MHz,  $\text{CDCl}_3$ )  $\delta$  7.76 – 7.74 (m, 3H), 7.65 (d,  $J = 7.7$  Hz, 4H), 7.46 – 7.39 (m, 5H), 7.38 – 7.32 (m, 5H), 7.21 – 7.18 (m, 1H), 6.96 (d,  $J = 7.8$  Hz, 1H), 5.40 (s, 1H).

$^{13}\text{C}$  NMR (150 MHz,  $\text{CDCl}_3$ )  $\delta$  149.35, 144.09, 142.19, 141.44, 140.96, 138.26, 130.67, 129.42, 128.82, 128.25, 127.68, 127.54, 127.48, 127.39, 127.20, 125.33, 122.39, 121.74.

HRMS (ESI):  $[\text{M}+\text{H}]^+$  Calcd. for  $[\text{C}_{60}\text{H}_{41}\text{O}_2]^+$  793.3102, found 793.3104.

IR (neat): 528, 3061, 3017, 2925, 1594, 1497, 1400, 1216, 1182, 1076, 884, 753, 699, 669  $\text{cm}^{-1}$ .

HPLC: Daicel Chiralpak<sup>®</sup> AD-H, 30%  $i$ PrOH, 70% hexane, 0.7 mL/min, 30 °C, 254 nm; >99%  $ee$  ( $t_R$  (major) = 11.16 min).

### Racemic

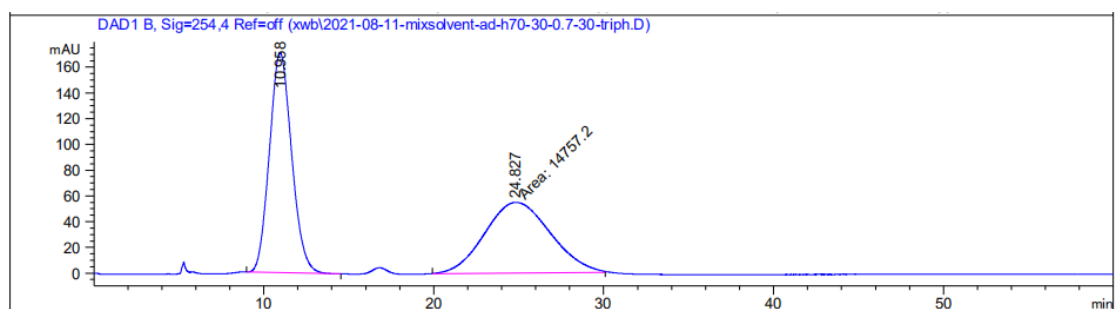

Signal 2: DAD1 B, Sig=254,4 Ref=off

| Peak # | RetTime [min] | Type | Width [min] | Area [mAU*s] | Height [mAU] | Area %  |
|--------|---------------|------|-------------|--------------|--------------|---------|
| 1      | 10.958        | BB   | 1.3634      | 1.55458e4    | 170.88400    | 51.3012 |
| 2      | 24.827        | MM   | 4.4781      | 1.47572e4    | 54.92372     | 48.6988 |

Totals : 3.03030e4 225.80772

### Enantioenriched

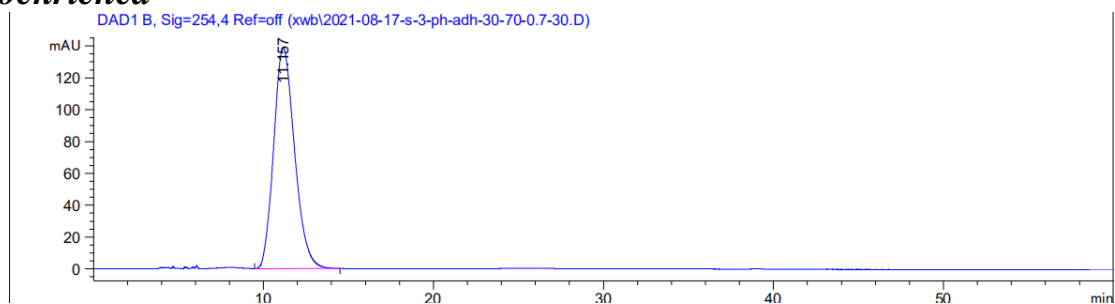

Signal 2: DAD1 B, Sig=254,4 Ref=off

| Peak # | RetTime [min] | Type | Width [min] | Area [mAU*s] | Height [mAU] | Area %   |
|--------|---------------|------|-------------|--------------|--------------|----------|
| 1      | 11.157        | BB   | 1.3071      | 1.18721e4    | 138.63240    | 100.0000 |

Totals : 1.18721e4 138.63240



# SUPPORTING INFORMATION

## Enantioenriched

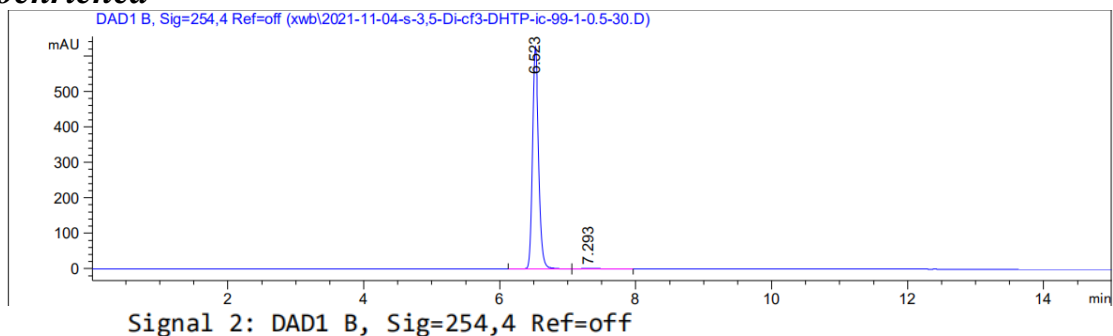

| Peak #   | RetTime [min] | Type | Width [min] | Area [mAU*s] | Height [mAU] | Area %  |
|----------|---------------|------|-------------|--------------|--------------|---------|
| 1        | 6.523         | BB   | 0.0980      | 3968.85254   | 625.66522    | 99.3665 |
| 2        | 7.293         | BB   | 0.2526      | 25.30327     | 1.37586      | 0.6335  |
| Totals : |               |      |             | 3994.15581   | 627.04108    |         |

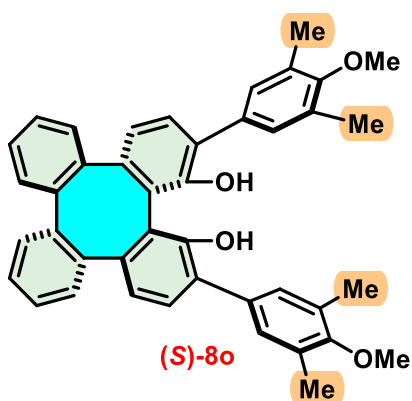

White solid. 513.9 mg, 85% yield. mp 152.6 – 153.7 °C.  $[\alpha]_D^{25}$ : +164.8 ( $c = 1.0$ ,  $\text{CHCl}_3$ ).

$^1\text{H NMR}$  (600 MHz,  $\text{CDCl}_3$ )  $\delta$  7.30 (t,  $J = 4.2$  Hz, 3H), 7.22 (d,  $J = 7.8$  Hz, 1H), 7.16 (d,  $J = 7.2$  Hz, 3H), 6.86 (d,  $J = 7.8$  Hz, 1H), 5.30 (s, 1H), 3.73 (s, 3H), 2.29 (s, 6H).

$^{13}\text{C NMR}$  (150 MHz,  $\text{CDCl}_3$ )  $\delta$  156.48, 149.09, 143.38, 141.48, 141.13, 132.67, 131.17, 130.17, 129.70, 129.30, 128.23, 127.49, 127.34, 127.02, 122.03, 121.82, 59.72, 16.16.

**HRMS (ESI):**  $[\text{M}+\text{H}]^+$  Calcd. for  $[\text{C}_{42}\text{H}_{37}\text{O}_4]^+$  605.2687, found 605.2689.

**IR** (neat): 3528, 3056, 3014, 2930, 2855, 2826, 1481, 1467, 1435, 1242, 1203, 1166, 750  $\text{cm}^{-1}$ .

**HPLC:** Daicel Chiralpak<sup>®</sup> AD-H, 1% *i*PrOH, 99% hexane, 1.0 mL/min, 40 °C, 254 nm; 99% *ee* ( $t_R$  (major) = 29.08 min,  $t_R$  (minor) = 39.18 min).

# SUPPORTING INFORMATION

## Racemic

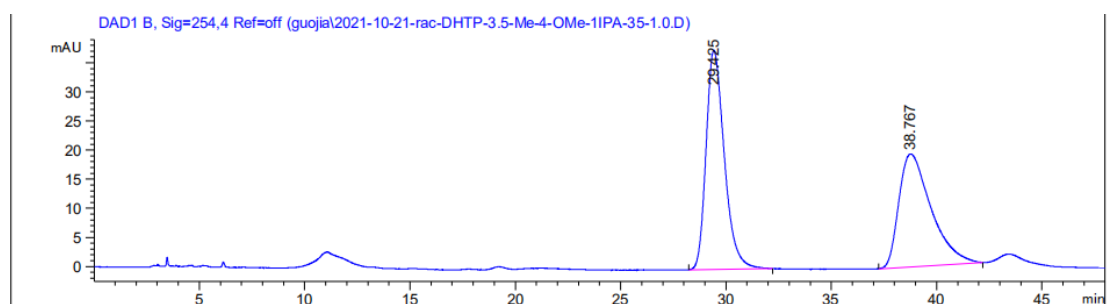

Signal 2: DAD1 B, Sig=254,4 Ref=off

| Peak # | RetTime [min] | Type | Width [min] | Area [mAU*s] | Height [mAU] | Area %  |
|--------|---------------|------|-------------|--------------|--------------|---------|
| 1      | 29.425        | BB   | 0.9190      | 2267.25439   | 37.62780     | 52.4103 |
| 2      | 38.767        | BB   | 1.2617      | 2058.71655   | 19.40524     | 47.5897 |

Totals : 4325.97095 57.03304

## Enantioenriched

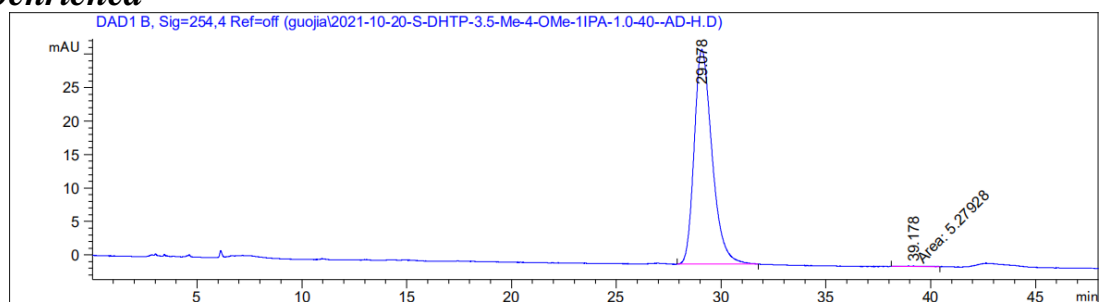

Signal 2: DAD1 B, Sig=254,4 Ref=off

| Peak # | RetTime [min] | Type | Width [min] | Area [mAU*s] | Height [mAU] | Area %  |
|--------|---------------|------|-------------|--------------|--------------|---------|
| 1      | 29.078        | BB   | 0.8834      | 1900.56519   | 32.06894     | 99.7230 |
| 2      | 39.178        | MM   | 1.1793      | 5.27928      | 7.46120e-2   | 0.2770  |

Totals : 1905.84447 32.14355

## SUPPORTING INFORMATION

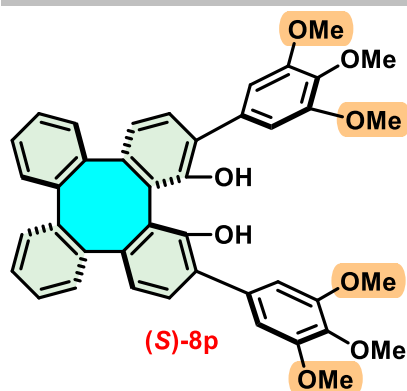

White solid. 501.6 mg, 75% yield. mp 153.5 – 154.6 °C.  $[\alpha]_D^{25}$ : +131.2 ( $c = 1.0$ ,  $\text{CHCl}_3$ ).

$^1\text{H NMR}$  (400 MHz,  $\text{CD}_2\text{Cl}_2$ )  $\delta$  7.43 – 7.36 (m, 3H), 7.33 (d,  $J = 7.8$  Hz, 1H), 7.26 – 7.20 (m, 1H), 6.93 (d,  $J = 7.8$  Hz, 1H), 6.75 (s, 2H), 5.53 (s, 1H), 3.86 (s, 6H), 3.83 (s, 3H).

$^{13}\text{C NMR}$  (150 MHz,  $\text{CDCl}_3$ )  $\delta$  153.43, 149.10, 143.72, 141.43, 141.01, 137.55, 132.73, 130.12, 129.41, 128.34, 127.60, 127.38, 127.17, 122.17, 122.08, 106.46, 60.91, 56.24.

**HRMS (ESI):**  $[\text{M}+\text{H}]^+$  Calcd. for  $[\text{C}_{42}\text{H}_{37}\text{O}_8]^+$  669.2483, found 669.2487.

**IR** (neat): 3528, 3058, 3014, 2936, 2834, 1585, 1511, 1466, 1430, 1402, 1347, 1238, 1126, 1004, 750  $\text{cm}^{-1}$ .

**HPLC:** Daicel Chiralpak<sup>®</sup> IG, 60%  $i$ PrOH, 40% hexane, 0.7 mL/min, 35 °C, 254 nm; >99%  $ee$  ( $t_R$  (major) = 26.43 min).

### Racemic

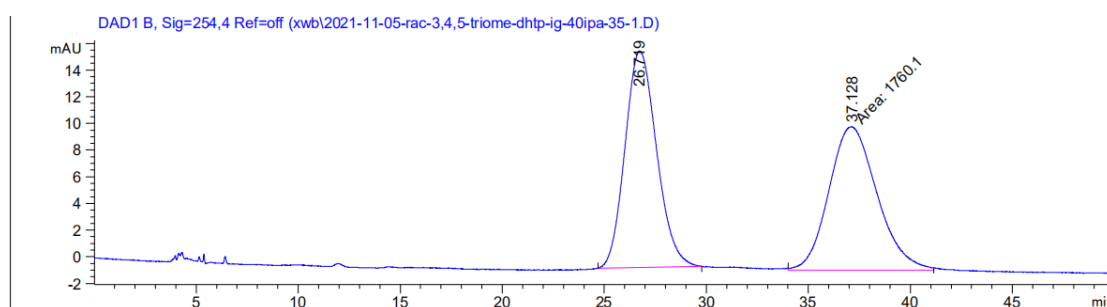

Signal 2: DAD1 B, Sig=254,4 Ref=off

| Peak # | RetTime [min] | Type | Width [min] | Area [mAU*s] | Height [mAU] | Area %  |
|--------|---------------|------|-------------|--------------|--------------|---------|
| 1      | 26.719        | BB   | 1.2793      | 1747.35352   | 16.21451     | 49.8183 |
| 2      | 37.128        | MM   | 2.7274      | 1760.09717   | 10.75579     | 50.1817 |

Totals : 3507.45068 26.97030

## SUPPORTING INFORMATION

### Enantioenriched

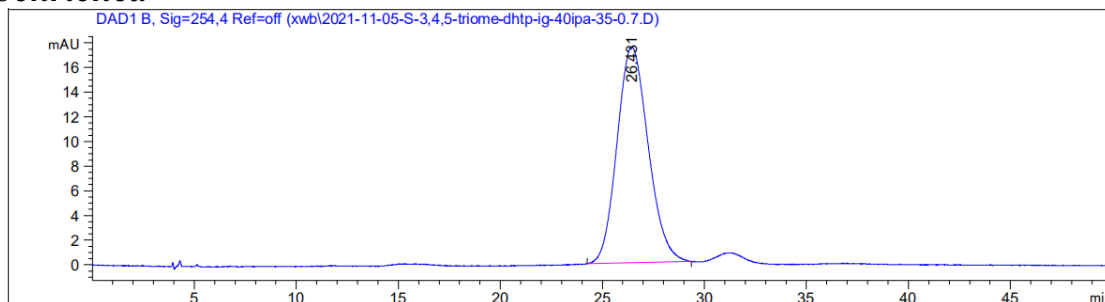

Signal 2: DAD1 B, Sig=254,4 Ref=off

| Peak #   | RetTime [min] | Type | Width [min] | Area [mAU*s] | Height [mAU] | Area %   |
|----------|---------------|------|-------------|--------------|--------------|----------|
| 1        | 26.431        | BB   | 1.2686      | 1860.26758   | 17.49457     | 100.0000 |
| Totals : |               |      |             | 1860.26758   | 17.49457     |          |

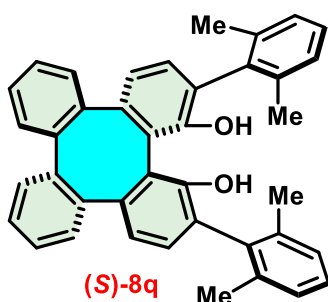

White solid. 305.0 mg, 56% yield. mp 141.2 – 143.0 °C.  $[\alpha]_D^{25}$ : +103.3 ( $c = 1.0$ ,  $\text{CHCl}_3$ ).

$^1\text{H NMR}$  (400 MHz,  $\text{CDCl}_3$ )  $\delta$  7.30 (ddd,  $J = 19.9, 5.6, 3.4$  Hz, 3H), 7.19 – 7.02 (m, 4H), 6.94 (d,  $J = 7.7$  Hz, 1H), 6.85 (d,  $J = 7.7$  Hz, 1H), 4.70 (s, 1H), 2.09 (s, 3H), 1.74 (s, 3H).

$^{13}\text{C NMR}$  (100 MHz,  $\text{CDCl}_3$ )  $\delta$  148.96, 143.42, 141.62, 141.40, 137.60, 137.39, 135.72, 129.47, 128.78, 128.01, 127.67, 127.65, 127.63, 127.25, 127.05, 125.71, 122.30, 121.49, 20.64, 19.85.

**HRMS (ESI):**  $[\text{M}+\text{H}]^+$  Calcd. for  $[\text{C}_{40}\text{H}_{33}\text{O}_2]^+$  545.2476, found 545.2477.

**IR** (neat): 3533, 3058, 3014, 2917, 2857, 1464, 1437, 1296, 1216, 1183, 1084, 906, 824, 750, 668  $\text{cm}^{-1}$ .

**HPLC:** Daicel Chiralpak<sup>®</sup> AD-H, 1%  $i$ PrOH, 99% hexane, 0.7 mL/min, 30 °C, 254 nm; >99% *ee* ( $t_R$  (major) = 6.99 min).

# SUPPORTING INFORMATION

## Racemic

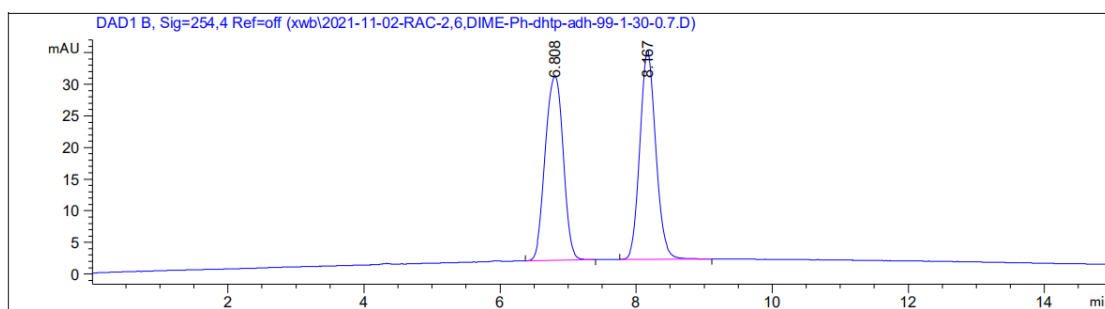

Signal 2: DAD1 B, Sig=254,4 Ref=off

| Peak # | RetTime [min] | Type | Width [min] | Area [mAU*s] | Height [mAU] | Area %  |
|--------|---------------|------|-------------|--------------|--------------|---------|
| 1      | 6.808         | BB   | 0.2971      | 536.65985    | 29.11122     | 49.9223 |
| 2      | 8.167         | BB   | 0.2525      | 538.32965    | 32.96986     | 50.0777 |

Totals : 1074.98950 62.08108

## Enantioenriched

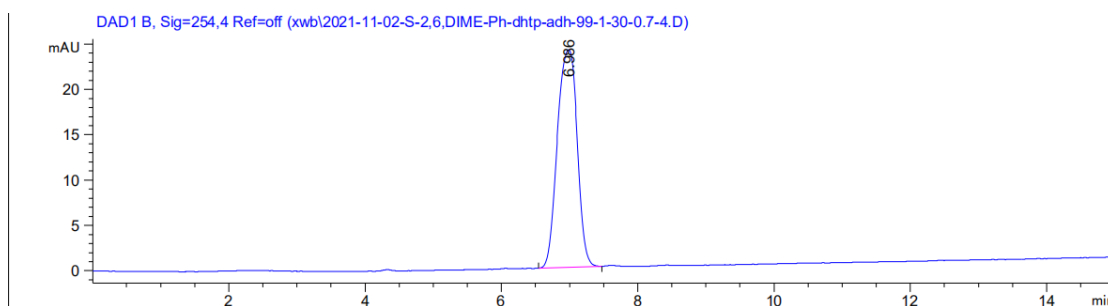

Signal 2: DAD1 B, Sig=254,4 Ref=off

| Peak # | RetTime [min] | Type | Width [min] | Area [mAU*s] | Height [mAU] | Area %   |
|--------|---------------|------|-------------|--------------|--------------|----------|
| 1      | 6.986         | BB   | 0.3298      | 484.56012    | 23.97944     | 100.0000 |

Totals : 484.56012 23.97944

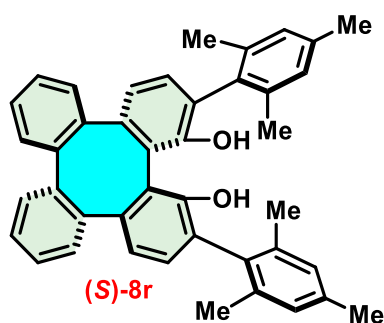

White solid. 240.5 mg, 42% yield. mp 142.1 – 143.0 °C.  $[\alpha]_D^{25}$ : +87.2 ( $c = 0.5$ ,  $\text{CHCl}_3$ ).



## SUPPORTING INFORMATION

$^1\text{H}$  NMR (600 MHz,  $\text{CDCl}_3$ )  $\delta$  7.34 – 7.30 (m, 1H), 7.30 – 7.26 (m, 2H), 7.18 – 7.14 (m, 1H), 6.95 – 6.91 (m, 2H), 6.89 (s, 1H), 6.84 (d,  $J = 7.7$  Hz, 1H), 4.72 (s, 1H), 2.29 (s, 3H), 2.05 (s, 3H), 1.71 (s, 3H).

$^{13}\text{C}$  NMR (150 MHz,  $\text{CDCl}_3$ )  $\delta$  149.08, 143.25, 141.59, 141.41, 137.55, 137.43, 137.20, 132.68, 129.66, 128.74, 128.43, 127.68, 127.17, 126.99, 125.66, 122.18, 121.39, 21.11, 20.48, 19.73.

**HRMS (ESI):**  $[\text{M}+\text{H}]^+$  Calcd. for  $[\text{C}_{42}\text{H}_{37}\text{O}_2]^+$  573.2789, found 573.2790.

**IR** (neat): 3529, 3056, 3014, 2921, 2857, 1558, 1458, 1437, 1219, 1084, 904, 852, 770, 753  $\text{cm}^{-1}$ .

**HPLC:** Daicel Chiralpak<sup>®</sup> AD-H, 5% *i*PrOH, 95% hexane, 0.7 mL/min, 30 °C, 254 nm; 99% *ee* ( $t_{\text{R}}$  (major) = 5.08 min,  $t_{\text{R}}$ (minor) = 4.61 min).

### Racemic

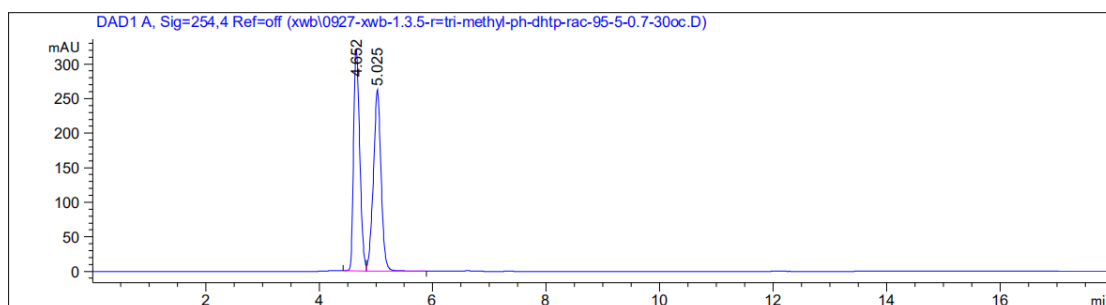

Signal 1: DAD1 A, Sig=254,4 Ref=off

| Peak # | RetTime [min] | Type | Width [min] | Area [mAU*s] | Height [mAU] | Area %  |
|--------|---------------|------|-------------|--------------|--------------|---------|
| 1      | 4.652         | BV   | 0.1207      | 2430.43530   | 319.75024    | 49.4706 |
| 2      | 5.025         | VB   | 0.1405      | 2482.45776   | 262.20929    | 50.5294 |

### Enantioenriched

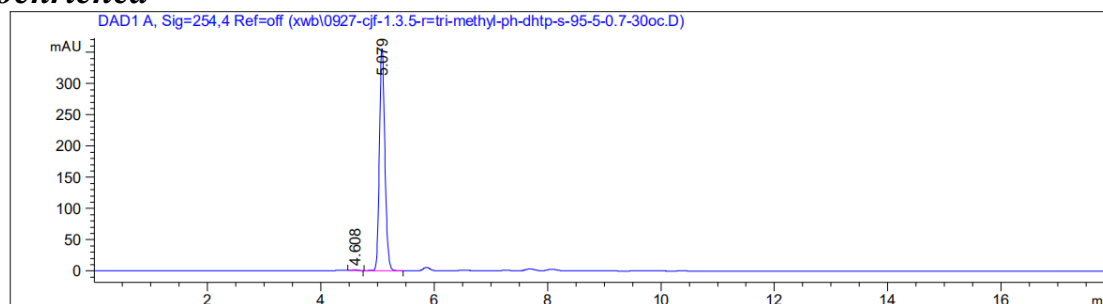

Signal 1: DAD1 A, Sig=254,4 Ref=off

| Peak # | RetTime [min] | Type | Width [min] | Area [mAU*s] | Height [mAU] | Area %  |
|--------|---------------|------|-------------|--------------|--------------|---------|
| 1      | 4.608         | BB   | 0.0799      | 9.01947      | 1.55030      | 0.3772  |
| 2      | 5.079         | BB   | 0.1021      | 2381.87036   | 355.84863    | 99.6228 |

## SUPPORTING INFORMATION

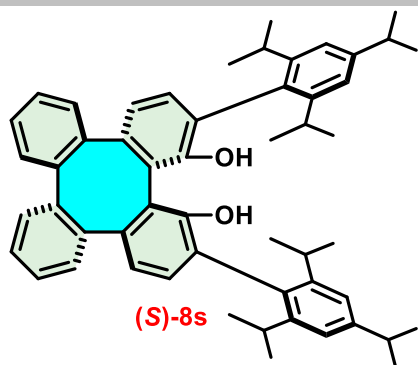

This compound was prepared following modified procedure.

White solid. 555.6 mg, 75% yield. mp 143.5 – 144.6 °C.  $[\alpha]_D^{25}$ : +99.6 ( $c = 1.0$ ,  $\text{CHCl}_3$ ).

$^1\text{H NMR}$  (400 MHz,  $\text{CDCl}_3$ )  $\delta$  7.37 (dd,  $J = 5.7, 3.2$  Hz, 1H), 7.35 – 7.27 (m, 2H), 7.23 – 7.15 (m, 1H), 7.10 (s, 1H), 7.05 (s, 1H), 6.97 (d,  $J = 7.6$  Hz, 1H), 6.85 (d,  $J = 7.6$  Hz, 1H), 4.64 (s, 1H), 3.03 – 2.76 (m, 2H), 2.22 – 2.04 (m, 1H), 1.31 (d,  $J = 6.9$  Hz, 6H), 1.14 (d,  $J = 6.8$  Hz, 3H), 1.10 (d,  $J = 7.0$  Hz, 3H), 0.90 (d,  $J = 6.9$  Hz, 3H), 0.85 (d,  $J = 6.8$  Hz, 3H).

$^{13}\text{C NMR}$  (150 MHz,  $\text{CDCl}_3$ )  $\delta$  149.90, 148.82, 147.96, 147.73, 143.04, 141.73, 141.56, 130.49, 130.01, 128.49, 127.11, 126.94, 126.82, 124.99, 122.23, 121.20, 121.07, 120.43, 34.31, 30.71, 30.18, 24.37, 24.06, 24.01, 23.95, 23.68, 23.68.

**HRMS (ESI):**  $[\text{M}-\text{H}]^-$  Calcd. for  $[\text{C}_{54}\text{H}_{59}\text{O}_2]^-$  739.4520, found 739.4514.

**IR** (neat): 3529, 3058, 3021, 2961, 2925, 2868, 1558, 1458, 1429, 1216, 770, 668  $\text{cm}^{-1}$ .

**HPLC:** Daicel Chiralpak<sup>®</sup> IA, 0.1%  $i$ PrOH, 99.9 % hexane, 0.7 mL/min, 30 °C, 254 nm; 98%  $ee$  ( $t_R$  (major) = 6.58 min).

### Racemic

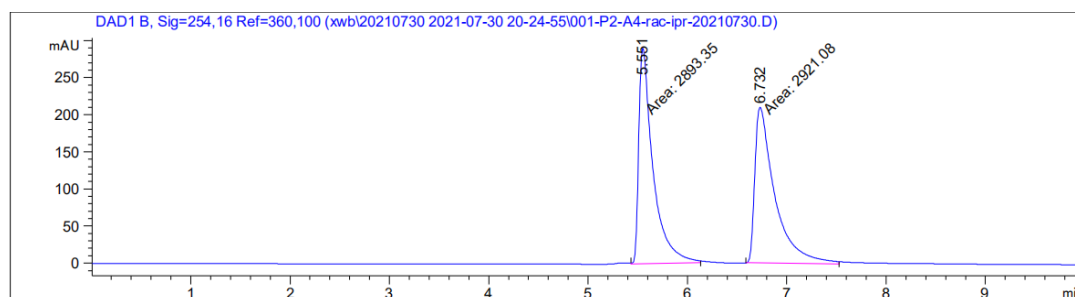

Signal 2: DAD1 B, Sig=254,16 Ref=360,100

| Peak # | RetTime [min] | Type | Width [min] | Area [mAU*s] | Height [mAU] | Area %  |
|--------|---------------|------|-------------|--------------|--------------|---------|
| 1      | 5.551         | MM   | 0.1662      | 2893.35449   | 290.08139    | 49.7616 |
| 2      | 6.732         | MM   | 0.2320      | 2921.08276   | 209.86952    | 50.2384 |

Totals : 5814.43726 499.95091

# SUPPORTING INFORMATION

## Enantioenriched

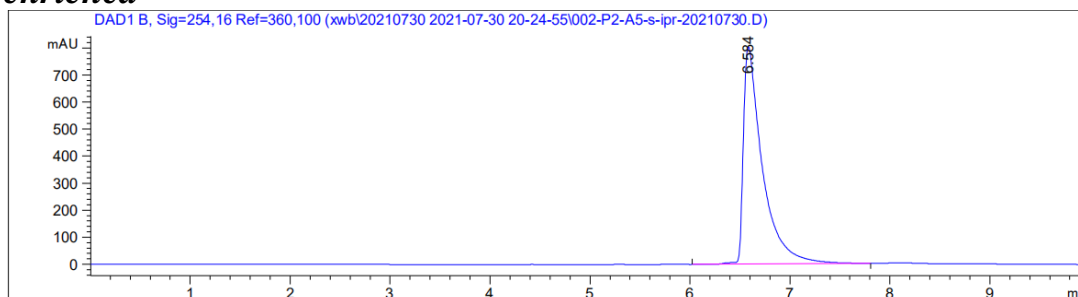

Signal 2: DAD1 B, Sig=254,16 Ref=360,100

| Peak # | RetTime [min] | Type | Width [min] | Area [mAU*s] | Height [mAU] | Area %   |
|--------|---------------|------|-------------|--------------|--------------|----------|
| 1      | 6.584         | VB R | 0.1881      | 1.06157e4    | 803.48834    | 100.0000 |

Totals : 1.06157e4 803.48834

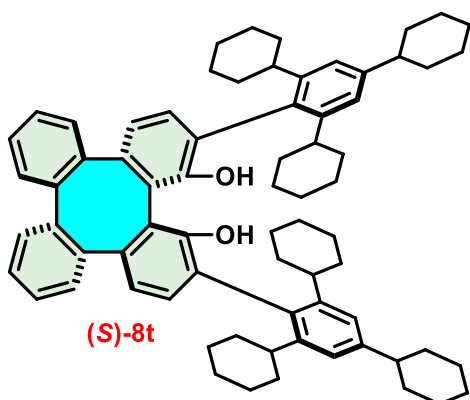

This compound was prepared following modified procedure.

White solid. 687.0 mg, 70% yield. mp 154.4 – 154.8 °C.  $[\alpha]_D^{25}$ : +107.4 ( $c = 0.5$ ,  $\text{CHCl}_3$ ).

$^1\text{H NMR}$  (600 MHz,  $\text{CDCl}_3$ )  $\delta$  7.32 (d,  $J = 6.8$  Hz, 1H), 7.23 – 7.16 (m, 2H), 7.07 (d,  $J = 7.0$  Hz, 1H), 6.94 (s, 1H), 6.89 (s, 1H), 6.82 (d,  $J = 7.7$  Hz, 1H), 6.74 (d,  $J = 7.6$  Hz, 1H), 4.47 (s, 1H), 2.42 (ddd,  $J = 11.5, 8.1, 3.4$  Hz, 1H), 2.31 (td,  $J = 10.3, 8.7, 6.0$  Hz, 1H), 1.85 (d,  $J = 11.8$  Hz, 2H), 1.77 (d,  $J = 12.4$  Hz, 2H), 1.72 – 1.61 (m, 3H), 1.52 – 1.12 (m, 17H), 1.12 – 0.92 (m, 5H), 0.66 (q,  $J = 12.9$  Hz, 1H), 0.43 (q,  $J = 12.7$  Hz, 1H).

$^{13}\text{C NMR}$  (150 MHz,  $\text{CDCl}_3$ )  $\delta$  149.99, 147.65, 146.99, 146.92, 142.97, 141.79, 141.77, 130.91, 130.18, 128.85, 127.41, 127.29, 126.76, 124.85, 122.21, 122.19, 122.04, 120.44, 44.74, 41.48, 41.17, 34.58, 34.55, 34.50, 34.48, 34.43, 33.81, 27.04, 27.01, 26.84, 26.79, 26.59, 26.27, 26.17, 26.10.

**HRMS (ESI):**  $[\text{M}-\text{H}]^-$  Calcd. for  $[\text{C}_{72}\text{H}_{83}\text{O}_2]^-$  979.6398, found 979.6390.

**IR** (neat): 3529, 3056, 2960, 2928, 2869, 1558, 1460, 1429, 1362, 1306, 1218, 1084, 906, 878, 751, 668  $\text{cm}^{-1}$ .

## SUPPORTING INFORMATION

HPLC: Daicel Chiralpak® IA, 0.2% *i*PrOH, 99.8 % hexane, 1.0 mL/min, 30 °C, 254 nm; 99% *ee* ( $t_R$  (major) = 12.33 min,  $t_R$ (minor) = 4.80 min).

### Racemic

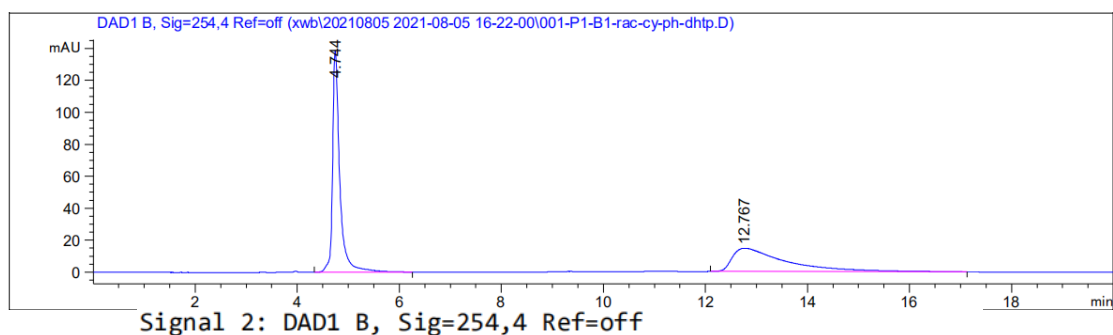

| Peak # | RetTime [min] | Type | Width [min] | Area [mAU*s] | Height [mAU] | Area %  |
|--------|---------------|------|-------------|--------------|--------------|---------|
| 1      | 4.744         | BB   | 0.1425      | 1362.87305   | 138.91057    | 56.2200 |
| 2      | 12.767        | BB   | 0.9832      | 1061.30347   | 14.54588     | 43.7800 |

Totals : 2424.17651 153.45645

### Enantioenriched

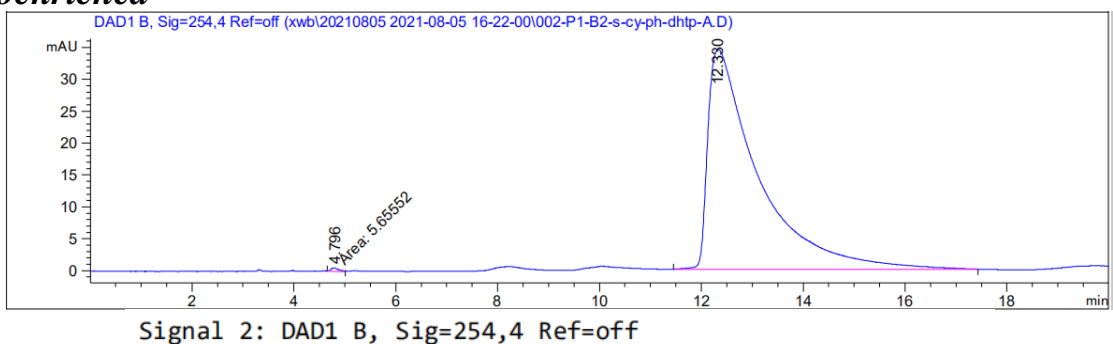

| Peak # | RetTime [min] | Type | Width [min] | Area [mAU*s] | Height [mAU] | Area %  |
|--------|---------------|------|-------------|--------------|--------------|---------|
| 1      | 4.796         | MM   | 0.1792      | 5.65552      | 5.26025e-1   | 0.2387  |
| 2      | 12.330        | BB   | 0.9304      | 2363.34717   | 34.44713     | 99.7613 |

Totals : 2369.00269 34.97315

## SUPPORTING INFORMATION

### General Procedure for Synthesis of (*S*)-DHTP Derived Phosphoramidite Ligands

#### Procedure A:

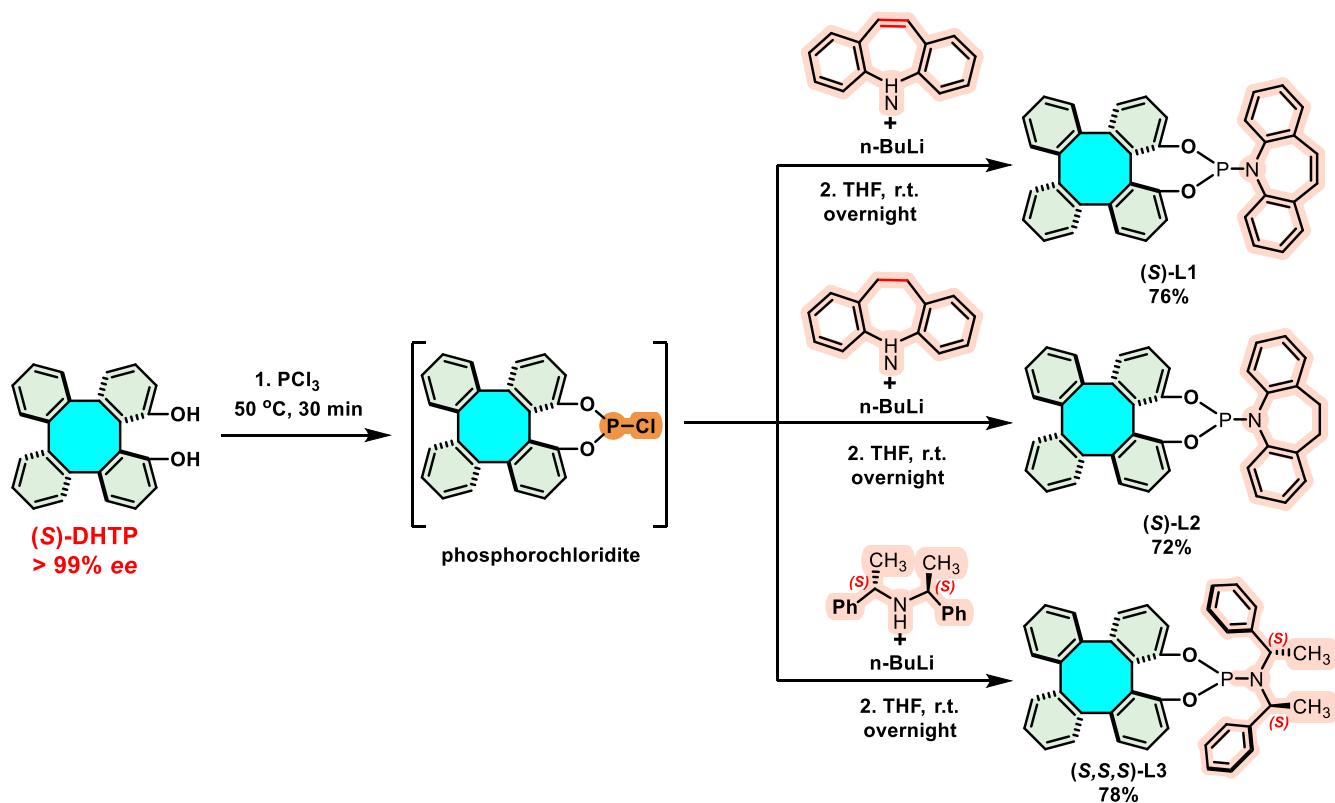

A flame dried Schlenk flask under argon was charged with the (*S*)-**DHTP** (1 mmol, 1.0 eq.) and  $\text{PCl}_3$  (15.0 eq.) was heated at  $50^\circ\text{C}$  during 30 min. The initially heterogeneous mixture turned into a brownish homogenous solution. After cooling to room temperature ( $25^\circ\text{C}$ ), the excess  $\text{PCl}_3$  was thoroughly evaporated in vacuo to remove remaining  $\text{PCl}_3$ . The resulting phosphorochloridite was redissolved in anhydrous THF (5 mL). In a separate Schlenk flask under argon, the corresponding amine (1.2 eq.) dissolved in anhydrous THF (10 mL) was deprotonated at  $-78^\circ\text{C}$  by the slow addition of *n*-BuLi (1.6 M solution in hexanes, 1.1 eq.). After being stirred at  $-78^\circ\text{C}$  for 1 hour, the aforementioned phosphorochloridite solution was slowly transferred into the resulting solution via syringe. The resulting mixture was stirred at  $-78^\circ\text{C}$ , then warmed to  $25^\circ\text{C}$  and continued to stir overnight. The solvent was evaporated in vacuo and purification by flash chromatography on silica gel using hexanes/toluene as the eluents to give the corresponding product as a white solid.

## SUPPORTING INFORMATION

### Procedure B:

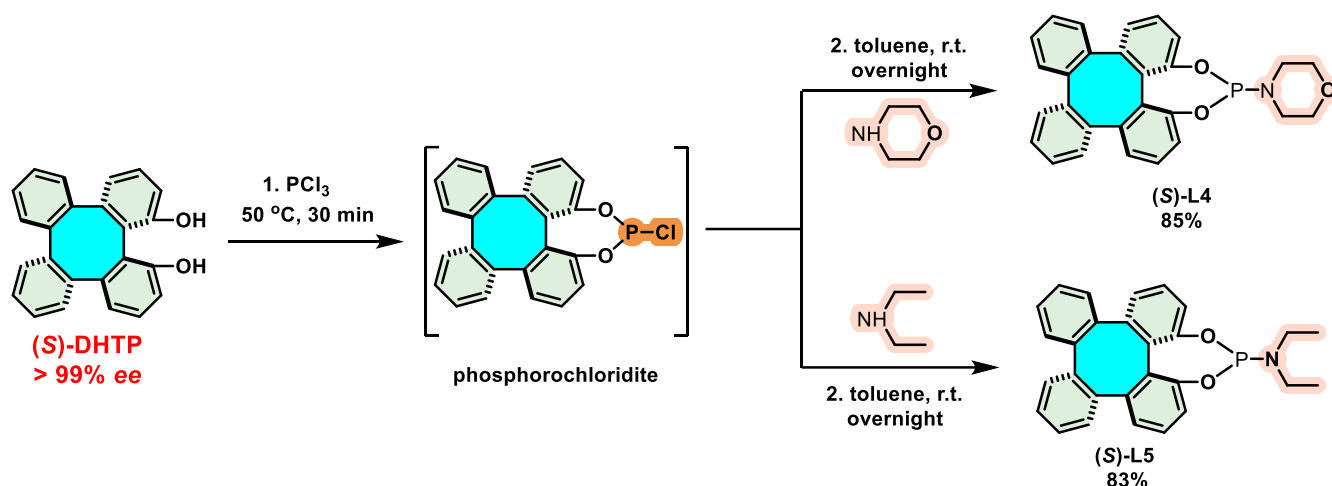

A flame dried Schlenk flask under argon was charged with the (S)-DHTP (1 mmol, 1.0 eq.) and  $\text{PCl}_3$  (15.0 eq.) was heated at 50 °C during 30 min. The initially heterogeneous mixture turned into a brownish homogenous solution. After cooling to room temperature (25 °C), the excess  $\text{PCl}_3$  was thoroughly evaporated in vacuo to remove remaining  $\text{PCl}_3$ . The resulting phosphorochloridite was dissolved in anhydrous toluene (5 mL) and cooled to 0 °C. To the resulting solution of phosphorochloridite were slowly added triethylamine (1.2 eq.) and the corresponding amine (1.2 eq.) via syringe. The resulting mixture was warmed to 25 °C and continued to stir overnight. The solvent was evaporated in vacuo and purification by flash chromatography on silica gel using hexanes/EtOAc as the eluents to give the corresponding product as a white solid.

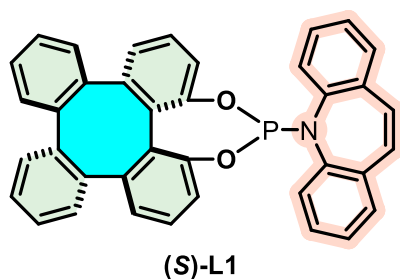

This compound was prepared following general procedure A using iminostilbene.

White solid. 423.6 mg, 76% yield. mp 274.1 – 274.6 °C.  $[\alpha]_{\text{D}}^{20}$ : –225.00 ( $c = 0.5$ ,  $\text{CHCl}_3$ ).

$^1\text{H NMR}$  (400 MHz, Acetone- $d_6$ )  $\delta$  7.42 – 7.17 (m, 15H), 7.11 – 6.97 (m, 6H), 6.88 (dd,  $J = 9.4, 8.0$  Hz, 2H), 6.76 (d,  $J = 7.4$  Hz, 1H).

$^{13}\text{C NMR}$  (100 MHz, Acetone- $d_6$ )  $\delta$  149.47, 149.07 (d,  $J = 6.5$  Hz), 144.08 (d,  $J = 1.6$  Hz), 143.01 (d,  $J = 1.2$  Hz), 142.95, 142.77, 142.30 (d,  $J = 4.4$  Hz), 141.27, 141.17, 141.03, 140.59, 136.45 (d,  $J = 3.2$  Hz), 136.00, 131.60, 131.19, 130.43 (d,  $J = 4.4$  Hz), 129.51, 129.40, 129.22, 129.21, 129.08 (d,  $J = 3.0$  Hz),

## SUPPORTING INFORMATION

129.04, 128.98, 128.62, 128.59 (d,  $J = 1.4$  Hz), 128.44 (d,  $J = 8.4$  Hz), 128.26, 128.16, 127.82, 127.70, 127.30, 127.27, 126.91 (d,  $J = 1.4$  Hz), 126.67, 126.65, 125.13, 120.67 (d,  $J = 2.4$  Hz), 120.37.

**DEPT 135  $^{13}\text{C}$  NMR** (150 MHz, Acetone- $d_6$ )  $\delta$  131.59, 131.19, 129.51, 129.40, 129.22, 129.21, 129.08 (d,  $J = 2.8$  Hz), 129.05, 128.99, 128.62, 128.59, 128.44 (d,  $J = 8.4$  Hz), 128.27, 128.16, 127.82, 127.70, 127.30, 127.27, 126.92, 126.67, 126.66, 125.13, 120.67 (d,  $J = 2.5$  Hz), 120.37.

**$^{31}\text{P}$  NMR** (162 MHz, Acetone- $d_6$ )  $\delta$  135.09.

**HRMS** (ESI):  $[\text{M}+\text{H}]^+$  Calcd. for  $[\text{C}_{38}\text{H}_{25}\text{NO}_2\text{P}]^+$  558.1618, found 558.1625.

**IR** (neat): 3065, 1595, 1560, 1485, 1431, 1207, 1107, 1076, 991, 914, 800, 760, 748, 727, 629  $\text{cm}^{-1}$ .

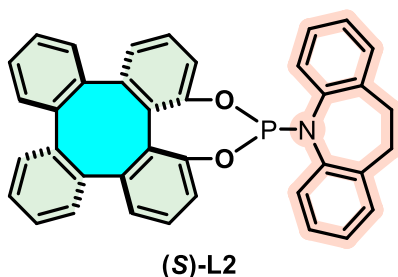

This compound was prepared following general procedure A using iminodibenzyl.

White solid. 403.2 mg, 72% yield. mp 270.1 – 270.6 °C.  $[\alpha]_D^{20}$ :  $-256.2$  ( $c = 0.5$ ,  $\text{CHCl}_3$ ).

**$^1\text{H}$  NMR** (400 MHz,  $\text{CD}_2\text{Cl}_2$ )  $\delta$  7.26 – 7.01 (m, 12H), 7.01 – 6.93 (m, 3H), 6.91 – 6.77 (m, 4H), 6.72 – 6.62 (m, 2H), 6.58 (d,  $J = 8.0$  Hz, 1H), 3.55 (dddd,  $J = 28.7, 15.2, 8.6, 3.2$  Hz, 2H), 2.87 – 2.73 (m, 2H).

**$^{13}\text{C}$  NMR** (100 MHz,  $\text{CD}_2\text{Cl}_2$ )  $\delta$  149.35, 149.26 (d,  $J = 7.3$  Hz), 144.04 (d,  $J = 1.5$  Hz), 143.13 (d,  $J = 1.1$  Hz), 142.98 (d,  $J = 16.3$  Hz), 142.82 (d,  $J = 5.9$  Hz), 141.33, 141.25, 141.08, 140.71, 137.40 (d,  $J = 3.4$  Hz), 137.29 (d,  $J = 1.8$  Hz), 130.51 (d,  $J = 4.6$  Hz), 130.21, 129.92, 129.71, 129.51, 129.02, 128.47 (d,  $J = 1.5$  Hz), 128.42 (d,  $J = 4.5$  Hz), 128.36, 128.30, 128.18 (d,  $J = 2.2$  Hz), 127.87 (d,  $J = 10.8$  Hz), 127.73, 127.34, 127.30, 127.11, 126.67, 126.53, 126.46, 126.40, 125.14, 120.91 (d,  $J = 2.5$  Hz), 120.20, 31.62, 31.53.

**$^{31}\text{P}$  NMR** (162 MHz,  $\text{CD}_2\text{Cl}_2$ )  $\delta$  133.79.

**HRMS** (ESI):  $[\text{M}+\text{H}]^+$  Calcd. for  $[\text{C}_{38}\text{H}_{27}\text{NO}_2\text{P}]^+$  560.1774, found 560.1785.

**IR** (neat): 3063, 2912, 1566, 1485, 1433, 1234, 1186, 1107, 984, 914, 798, 748, 725, 696, 629  $\text{cm}^{-1}$ .

## SUPPORTING INFORMATION

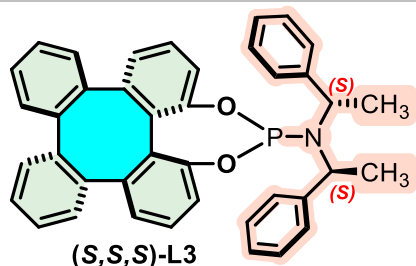

This compound was prepared following general procedure A using *bis*[(*S*)- $\alpha$ -methylbenzyl]amine.

White solid. 459.1 mg, 78% yield. mp 114.2 – 114.6 °C.  $[\alpha]^{20}_{\text{D}}$ : –430.1 ( $c = 0.5$ , CHCl<sub>3</sub>).

$^1\text{H NMR}$  (400 MHz, Acetone- $d_6$ )  $\delta$  7.41 – 7.32 (m, 3H), 7.31 – 7.10 (m, 16H), 7.07 – 7.02 (m, 2H), 7.01 – 6.94 (m, 2H), 6.85 (d,  $J = 7.5$  Hz, 1H), 4.50 (dq,  $J = 11.0, 7.0$  Hz, 2H), 1.68 (d,  $J = 7.1$  Hz, 6H).

$^{13}\text{C NMR}$  (150 MHz, CDCl<sub>3</sub>)  $\delta$  149.33, 149.04 (d,  $J = 8.6$  Hz), 142.87 (d,  $J = 1.6$  Hz), 142.47, 142.30, 140.35, 140.21, 140.18, 139.81, 129.57, 129.53, 128.75, 128.55, 127.72, 127.39 (d,  $J = 1.8$  Hz), 127.22, 127.12, 127.04, 126.99, 126.97, 126.76, 126.53, 126.47, 126.03, 125.96, 125.66, 124.08, 119.91 (d,  $J = 2.7$  Hz), 119.69, 53.72, 53.65, 21.98, 21.90.

**Dept135**  $^{13}\text{C NMR}$  (150 MHz, CDCl<sub>3</sub>)  $\delta$  128.75, 128.55, 127.71, 127.22, 127.12, 127.04, 126.99, 126.97, 126.76, 126.53, 126.47, 126.03, 125.96, 125.66, 124.08, 119.91 (d,  $J = 2.7$  Hz), 119.69, 53.72, 53.65, 21.98, 21.90.

$^{31}\text{P NMR}$  (243 MHz, CDCl<sub>3</sub>)  $\delta$  149.30.

**HRMS** (ESI):  $[\text{M}+\text{H}]^+$  Calcd. for  $[\text{C}_{40}\text{H}_{33}\text{NO}_2\text{P}]^+$  590.2244, found 590.2254.

**IR** (neat): 3105, 2959, 2872, 1720, 1543, 1531, 1346, 1234, 1171, 1111, 1076, 910, 800, 752, 727, 700, 629  $\text{cm}^{-1}$ .

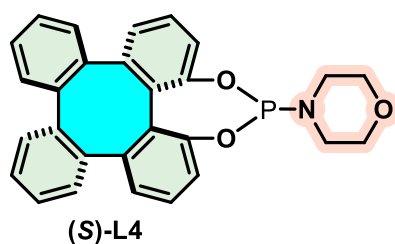

This compound was prepared following general procedure A using morpholine.

White solid. 384.0 mg, 85% yield. mp 127.4 – 128.1 °C.  $[\alpha]^{20}_{\text{D}}$ : –149.5 ( $c = 0.5$ , CHCl<sub>3</sub>).

$^1\text{H NMR}$  (400 MHz, Acetone- $d_6$ )  $\delta$  7.41 – 7.28 (m, 6H), 7.24 (dd,  $J = 7.5, 1.3$  Hz, 2H), 7.18 (d,  $J = 8.0$  Hz, 1H), 7.13 (dd,  $J = 8.2, 1.1$  Hz, 1H), 7.10 (d,  $J = 7.5$  Hz, 2H), 7.02 (d,  $J = 7.6$  Hz, 1H), 6.99 (d,  $J = 7.6$  Hz, 1H), 3.51 (t,  $J = 4.7$  Hz, 4H), 3.14 – 3.03 (m, 2H), 3.00 – 2.89 (m, 2H).



## SUPPORTING INFORMATION

**$^{13}\text{C}$  NMR** (100 MHz, Acetone- $d_6$ )  $\delta$  150.03, 149.61 (d,  $J = 4.4$  Hz), 143.96 (d,  $J = 1.7$  Hz), 143.64, 141.21, 141.14, 140.92, 140.67, 130.38 (d,  $J = 4.2$  Hz), 129.55, 129.40 (d,  $J = 1.8$  Hz), 129.09, 129.07, 128.49, 128.47, 127.83, 127.80, 127.38, 127.33, 126.56 (d,  $J = 1.6$  Hz), 125.64, 120.64, 120.47 (d,  $J = 2.2$  Hz), 67.48, 67.43, 44.45, 44.27.

**Dept135  $^{13}\text{C}$  NMR** (150 MHz, Acetone- $d_6$ )  $\delta$  129.55, 129.09, 129.06, 128.49, 128.47, 127.83, 127.80, 127.38, 127.33, 126.56, 125.63, 120.64, 120.47 (d,  $J = 2.1$  Hz), 67.47, 67.44, 44.42, 44.30.

**$^{31}\text{P}$  NMR** (162 MHz, Acetone- $d_6$ )  $\delta$  141.99.

**HRMS** (ESI):  $[\text{M}+\text{H}]^+$  Calcd. for  $[\text{C}_{28}\text{H}_{23}\text{NO}_3\text{P}]^+$  452.1411, found 452.1417.

**IR** (neat): 3107, 2957, 2928, 2855, 1720, 1543, 1431, 1346, 1258, 1234, 1171, 1111, 1078, 1043, 954, 910, 800, 761, 744, 727, 700, 679, 630  $\text{cm}^{-1}$ .

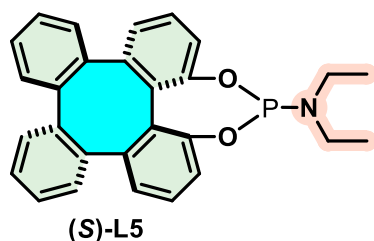

This compound was prepared following general procedure B using diethylamine.

White solid. 363.5 mg, 83% yield. mp 95.4 – 95.8 °C.  $[\alpha]_D^{20}$ :  $-217.1$  ( $c = 0.5$ ,  $\text{CHCl}_3$ ).

**$^1\text{H}$  NMR** (400 MHz,  $\text{CDCl}_3$ )  $\delta$  7.27 – 7.20 (m, 2H), 7.20 – 7.08 (m, 6H), 7.06 – 6.96 (m, 3H), 6.87 (tdd,  $J = 7.7, 6.6, 1.2$  Hz, 3H), 3.02 – 2.87 (m, 2H), 2.75 (ddd,  $J = 14.3, 12.9, 7.0$  Hz, 2H), 0.98 (t,  $J = 7.1$  Hz, 6H).

**$^{13}\text{C}$  NMR** (100 MHz,  $\text{CDCl}_3$ )  $\delta$  150.19, 149.90 (d,  $J = 4.2$  Hz), 143.73 (d,  $J = 1.4$  Hz), 143.50, 141.25, 141.16, 141.14, 140.88, 130.47 (d,  $J = 4.3$  Hz), 129.84, 129.66, 129.43 (d,  $J = 1.8$  Hz), 128.65, 128.54, 128.49, 128.40, 127.53, 127.13, 127.07, 126.49 (d,  $J = 1.4$  Hz), 125.34, 120.59 (d,  $J = 2.4$  Hz), 120.19, 38.37, 38.15, 14.82, 14.79.

**$^{31}\text{P}$  NMR** (162 MHz,  $\text{CDCl}_3$ )  $\delta$  147.00.

**HRMS** (ESI):  $[\text{M}+\text{H}]^+$  Calcd. for  $[\text{C}_{28}\text{H}_{25}\text{NO}_2\text{P}]^+$  438.1618, found 438.1624.

**IR** (neat): 3107, 2961, 2910, 2872, 1719, 1630, 1541, 1462, 1346, 1277, 1169, 1078, 1041, 995, 916, 798, 727, 719, 680, 630  $\text{cm}^{-1}$ .

## SUPPORTING INFORMATION

### Procedure for the Synthesis of **91** <sup>[1]</sup>

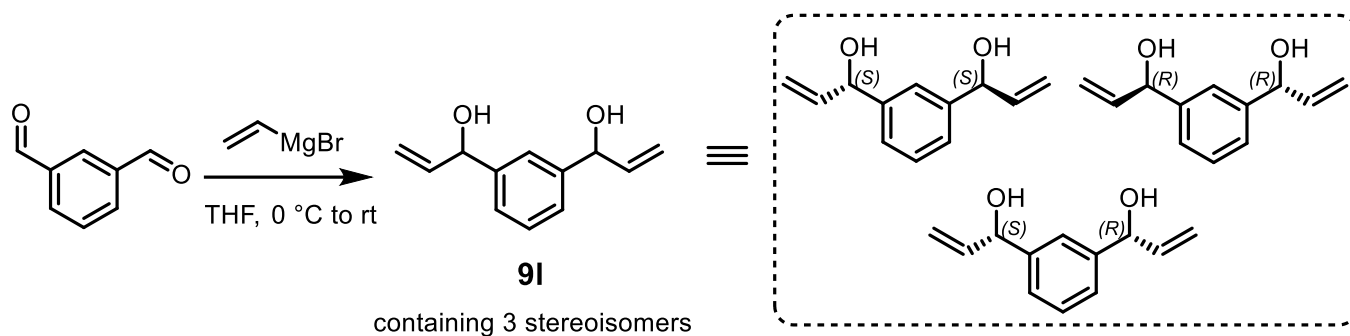

In a flame dried Schlenk flask, a solution of isophthalaldehyde (10 mmol, 1.34 g) in dry THF (20 mL) was cooled to 0 °C under Argon. Vinyl magnesium bromide (20 mmol, 20 ml, 1.0 M in THF) was added dropwise. After 15 min, the reaction was allowed to warm to room temperature and stirred for additional 3 h. The reaction mixture was quenched by addition of saturated aqueous NH<sub>4</sub>Cl and extracted with EtOAc (3×50 ml). The organic phase was washed with brine, dried over MgSO<sub>4</sub>. The solvent was removed under vacuum and the residue was purified by column chromatography on silica gel (EtOAc/hexane 1:4) to give the corresponding allylic alcohol substrates **91** (containing 3 stereoisomers which were not separable by TLC and NMR).

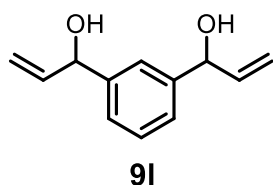

Colorless oil. 1.05 g, 55% yield.

<sup>1</sup>H NMR (400 MHz, CDCl<sub>3</sub>) δ 7.29 (s, 1H), 7.24 (d, *J* = 6.9 Hz, 1H), 7.21 – 7.16 (m, 2H), 6.01 – 5.87 (m, 2H), 5.30 – 5.20 (m, 2H), 5.14 – 5.05 (m, 4H), 2.32 (s, 2H).

<sup>13</sup>C NMR (100 MHz, CDCl<sub>3</sub>) δ 142.95, 140.10, 128.76, 125.78, 124.28, 115.28, 75.26.

## SUPPORTING INFORMATION

### Procedure for the Synthesis of **9m** <sup>[2]</sup>

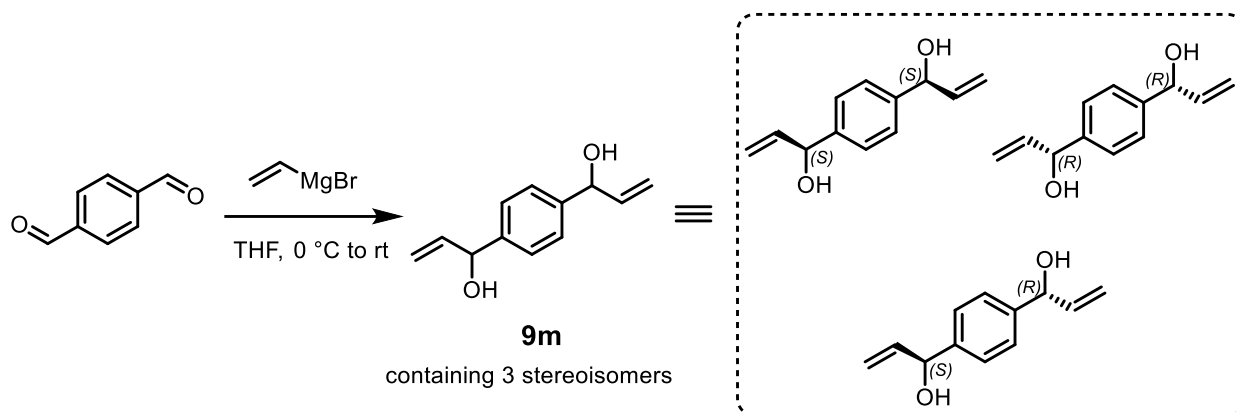

In a flame dried Schlenk flask, a solution of terephthalaldehyde (10 mmol, 1.34 g) in dry THF (20 mL) was cooled to 0 °C under Argon. Vinyl magnesium bromide (20 mmol, 20 ml, 1.0 M in THF) was added dropwise. After 15 min, the reaction was allowed to warm to room temperature and stirred for additional 3 h. The reaction mixture was quenched by addition of saturated aqueous  $\text{NH}_4\text{Cl}$  and extracted with EtOAc (3×50 ml). The organic phase was washed with brine, dried over  $\text{MgSO}_4$ . The solvent was removed under vacuum and the residue was purified by column chromatography on silica gel (EtOAc/hexane 1:4) to give the corresponding allylic alcohol substrates **9m** (containing 3 stereoisomers which were not separable by TLC and NMR).

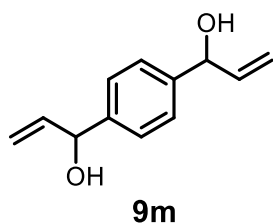

White solid. 0.80 g, 42% yield.

$^1\text{H NMR}$  (400 MHz,  $\text{CDCl}_3$ )  $\delta$  7.29 (s, 4H), 6.04 – 5.87 (m, 2H), 5.28 (d,  $J = 17.1$  Hz, 2H), 5.18 – 5.08 (m, 4H), 1.86 (brs, 2H).

$^{13}\text{C NMR}$  (100 MHz,  $\text{CDCl}_3$ )  $\delta$  142.13, 140.14, 126.56, 115.24, 75.13.

## SUPPORTING INFORMATION

### Procedure for the Synthesis of **9n**

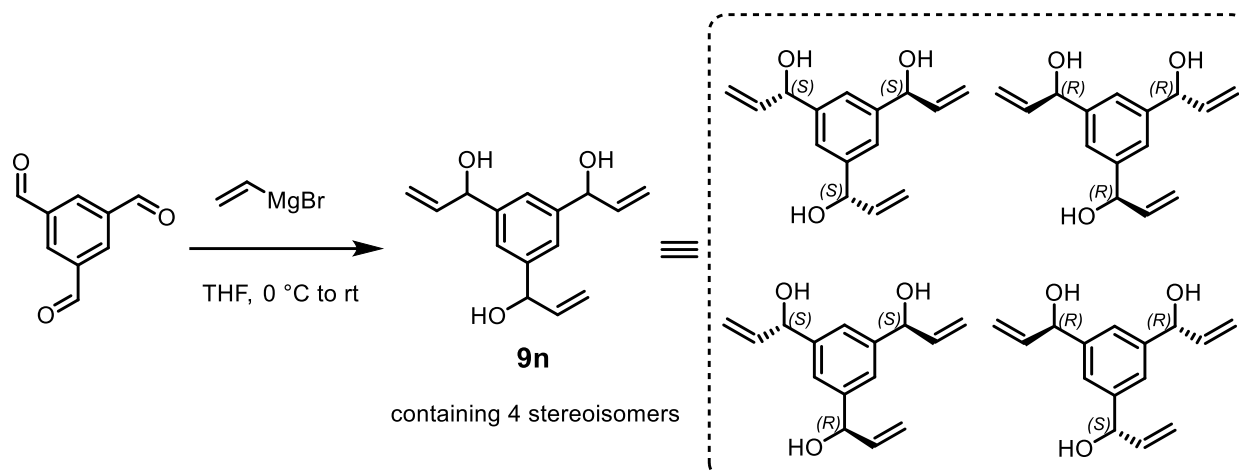

In a flame dried Schlenk flask, a solution of benzene-1,3,5-tricarbaldehyde (10 mmol, 1.62 g) in dry THF (20 mL) was cooled to  $0\text{ }^\circ\text{C}$  under Argon. Vinyl magnesium bromide (30 mmol, 30 mL, 1.0 M in THF) was added dropwise. After 15 min, the reaction was allowed to warm to room temperature and stirred for additional 3 h. The reaction mixture was quenched by addition of saturated aqueous  $\text{NH}_4\text{Cl}$  and extracted with EtOAc ( $3 \times 50$  mL). The organic phase was washed with brine, dried over  $\text{MgSO}_4$ . The solvent was removed under vacuum and the residue was purified by column chromatography on silica gel (EtOAc/hexane 1:2) to give the corresponding allylic alcohol substrates **9n** (containing 4 stereoisomers which were not separable by TLC and NMR).

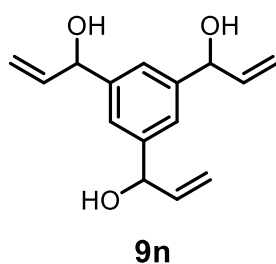

Pale yellow solid. 1.16 g, 47% yield. mp  $97.9 - 98.5\text{ }^\circ\text{C}$ .

$^1\text{H NMR}$  (400 MHz,  $\text{DMSO}-d_6$ )  $\delta$  7.16 (s, 1H), 5.91 (ddd,  $J = 16.5, 10.0, 6.0$  Hz, 1H), 5.45 (d,  $J = 3.9$  Hz, 1H), 5.24 (d,  $J = 17.1$  Hz, 1H), 5.10 – 4.95 (m, 2H).

$^{13}\text{C NMR}$  (100 MHz,  $\text{DMSO}-d_6$ )  $\delta$  144.30, 142.51, 123.14, 113.78, 74.09.

**HRMS (ESI):**  $[\text{M}+\text{Na}]^+$  Calcd for  $[\text{C}_{15}\text{H}_{18}\text{O}_3\text{Na}]^+$  269.1149, found 269.1143.

**IR**(neat): 3367, 2922, 2855, 1660, 1603, 1470, 1421, 1221, 991, 912, 773, 745,  $611\text{ cm}^{-1}$ .

## SUPPORTING INFORMATION

### Procedure for the Synthesis of Potassium Alkynyltrifluoroborates **10h** [3]

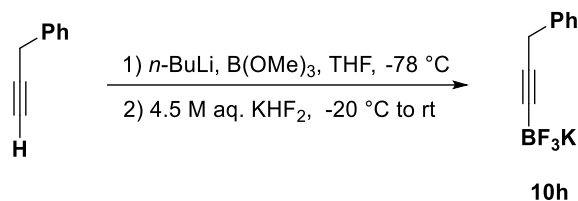

To a solution of 3-phenyl-1-propyne (5 mmol, 0.58 g) in dry THF (10 mL) at  $-78\text{ }^{\circ}\text{C}$  was added *n*-BuLi (5 mmol, 3.1 mL, 1.6 M in hexane) was added dropwise. The resulting solution was stirred for 0.5 h. Trimethylborate (7.5 mmol, 0.78 g) was added dropwise at  $-78\text{ }^{\circ}\text{C}$ . After being stirred for 0.5 h, the reaction mixture was warmed to  $-20\text{ }^{\circ}\text{C}$  and stirred for additional 0.5 h. Aqueous  $\text{KHF}_2$  (30 mmol) was added dropwise, and after 1 h the solution was allowed to warm to rt for 2 h. The solvent was removed under reduced pressure. The residue was dried under vacuum to remove water and then dissolved in hot acetone (3 x 15 mL). The solution was filtered and the filtrate was concentrated to a minimal volume ( $\sim 10$  mL) under vacuum.  $\text{Et}_2\text{O}$  ( $\sim 30$  mL) was added to precipitate the potassium trifluoroborate. The mixture was cooled to  $0\text{ }^{\circ}\text{C}$  to complete the precipitation. The white solid was collected by filtration to give **10h**.

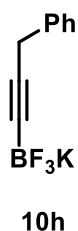

White solid. 0.61 g, 55% yield.

$^1\text{H NMR}$  (400 MHz,  $\text{DMSO-}d_6$ )  $\delta$  7.35 – 7.27 (m, 4H), 7.22 – 7.17 (m, 1H), 3.44 (s, 2H).

$^{13}\text{C NMR}$  (150 MHz,  $\text{DMSO-}d_6$ )  $\delta$  138.69, 128.64, 128.32, 126.52, 87.00 (relaxation time  $d_1 = 3$  seconds, no clear signal for the second acetylenic carbon atom), 25.57.

$^{19}\text{F NMR}$  (565 MHz,  $\text{DMSO-}d_6$ )  $\delta$  -131.25.

**HRMS (ESI):**  $[\text{M-K}]^-$  Calcd for  $[\text{C}_9\text{H}_7\text{BF}_3]^-$  183.0598, found 183.0591.

## General Procedure for Ir-Catalyzed Allylic Alkynylation

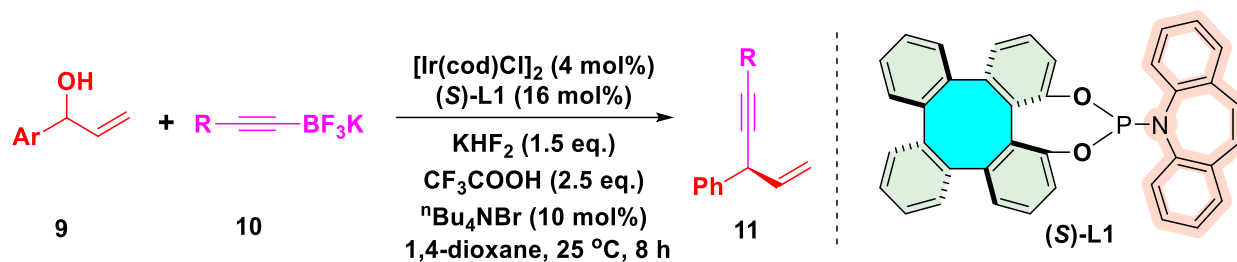

## A) Procedure for Product 11a:

$[\text{Ir}(\text{cod})\text{Cl}]_2$  (5.4 mg, 8.0  $\mu\text{mol}$ , 4 mol%) and (S)-L1 (17.8 mg, 32.0  $\mu\text{mol}$ , 16 mol%) were dissolved in 1,4-dioxane (0.4 mL) in a Schlenk tube and vigorously stirred for 15 min. To the resulting dark red solution, allylic alcohol **9a** (0.2 mmol, 1.0 eq.), potassium alkynyltrifluoroborate **10a** (0.3 mmol, 1.5 eq.),  $n\text{Bu}_4\text{NBr}$  (6.6 mg, 20  $\mu\text{mol}$ , 10 mol%),  $\text{KHF}_2$  (23.7 mg, 0.3 mmol, 1.5 eq.), and  $\text{CF}_3\text{COOH}$  (58.0 mg, 0.5 mmol, 2.5 eq.) were sequentially added. Reaction vessel was flushed with nitrogen, and resulting heterogeneous orange mixture was stirred at 25 °C for 8 h. The reaction mixture was diluted with hexanes (1.0 mL), treated with triethylamine (0.1 mL), and directly subjected to purification by flash chromatography on silica gel using  $\text{CH}_2\text{Cl}_2$ /hexane as the eluents to give the product **11a**.

## B) General Procedure for Products 11b-n:

$[\text{Ir}(\text{cod})\text{Cl}]_2$  (10.8 mg, 16.0  $\mu\text{mol}$ , 4 mol%) and (S)-L1 (35.6 mg, 64.0  $\mu\text{mol}$ , 16 mol%) were dissolved in 1,4-dioxane (0.8 mL) in a Schlenk tube and vigorously stirred for 15 min. To the resulting dark red solution, allylic alcohol **9** (0.4 mmol, 1.0 eq.), potassium alkynyltrifluoroborate **10** (0.6 mmol, 1.5 eq.),  $n\text{Bu}_4\text{NBr}$  (13.0 mg, 40  $\mu\text{mol}$ , 10 mol%),  $\text{KHF}_2$  (47.6 mg, 0.6 mmol, 1.5 eq.), and  $\text{CF}_3\text{COOH}$  (115.2 mg, 1.0 mmol, 2.5 eq.) were sequentially added. Reaction vessel was flushed with nitrogen, and resulting heterogeneous orange mixture was stirred at 25 °C for 8 h. The reaction mixture was diluted with hexanes (2.0 mL), treated with triethylamine (0.2 mL), and directly subjected to purification by flash chromatography on silica gel using  $\text{CH}_2\text{Cl}_2$ /hexane as the eluents to give the product **11**.

(Notes: when the substrate **9** containing two or three allylic alcohol moieties (**9l**, **9m** and **9n**), the usage amount of potassium alkynyltrifluoroborate **10** and all of additives were double or triple, respectively.)

## SUPPORTING INFORMATION

The stereoconfiguration of products **11a-n** was determined by comparison of optical rotations of **11a** and **11e** previously reported in literature (*Angew. Chem. Int. Ed.*, **2013**, *52*, 7532-7535).<sup>[4]</sup>

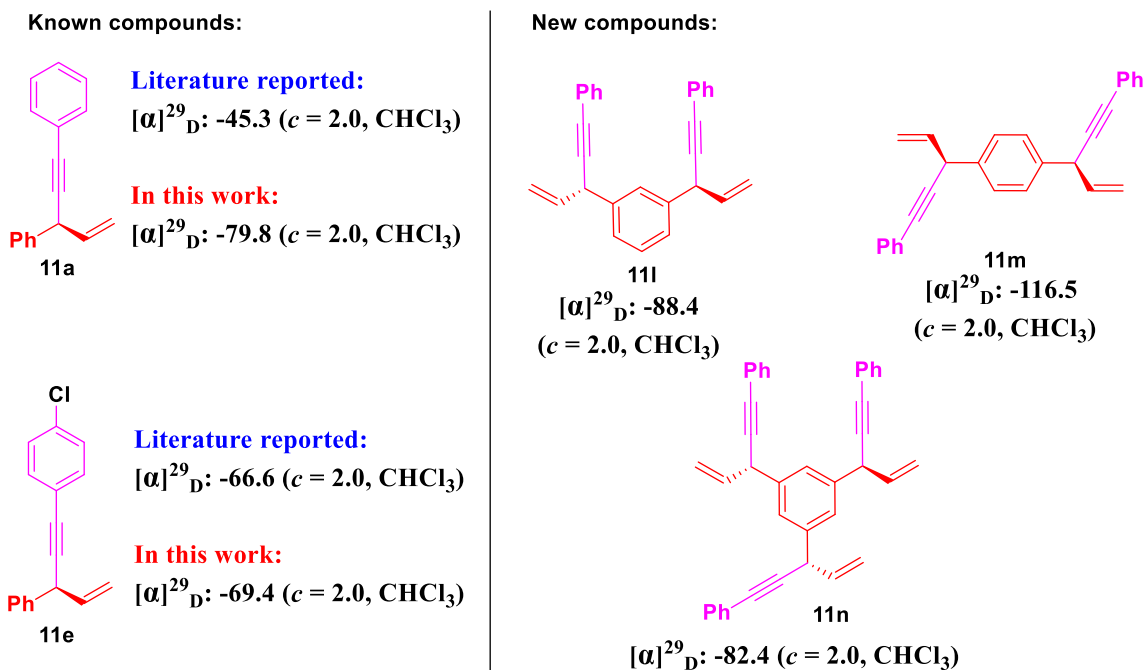

The ( $\pm$ )-**11a-n** for HPLC determination were prepared by using racemic BINOL-based ( $\pm$ )-**L7** as a ligand under the above standard conditions.

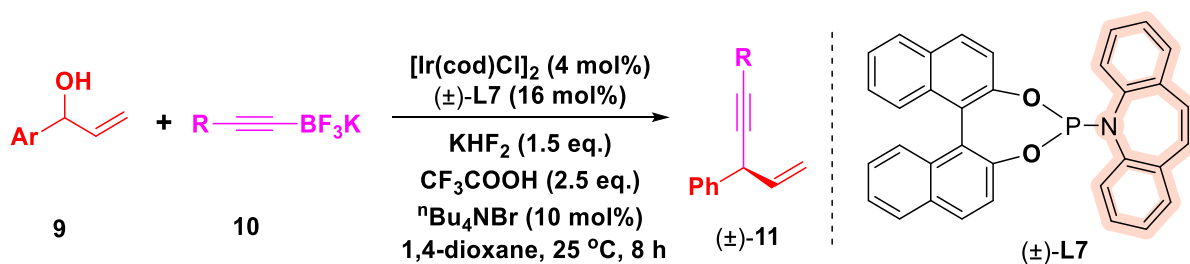

## SUPPORTING INFORMATION

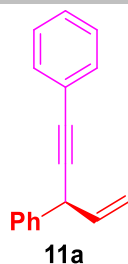

Colorless oil. 37.1 mg, 85% yield.  $[\alpha]_{\text{D}}^{29}$ : -79.8 ( $c = 2.0$ ,  $\text{CHCl}_3$ ) (lit<sup>[4]</sup>:  $[\alpha]_{\text{D}}^{29}$ : -45.3 ( $c = 2.0$ ,  $\text{CHCl}_3$ )).

$^1\text{H NMR}$  (400 MHz,  $\text{CDCl}_3$ )  $\delta$  7.50 – 7.40 (m, 4H), 7.39 – 7.32 (m, 2H), 7.32 – 7.28 (m, 3H), 7.27 – 7.24 (m, 1H), 6.01 (ddd,  $J = 16.9, 9.9, 6.1$  Hz, 1H), 5.46 (dt,  $J = 16.9, 1.5$  Hz, 1H), 5.19 (dt,  $J = 9.9, 1.4$  Hz, 1H), 4.59 (d,  $J = 6.1$  Hz, 1H).

$^{13}\text{C NMR}$  (150 MHz,  $\text{CDCl}_3$ )  $\delta$  140.15, 137.91, 131.67, 128.65, 128.22, 127.96, 127.68, 127.02, 123.49, 115.25, 88.64, 85.32, 41.96.

**HPLC**: Daicel Chiralcel® OJ-H, 5%  $i\text{PrOH}$ , 95% hexane, 0.7 mL/min, 40 °C, 220 nm; 99% *ee* ( $t_{\text{R}}$  (major) = 9.27 min,  $t_{\text{R}}$ (minor) = 10.00 min).

### Racemic

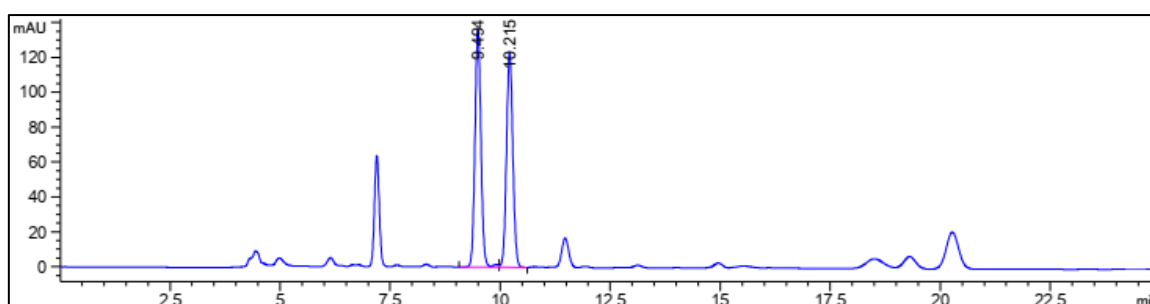

| Peak # | RetTime [min] | Type | Width [min] | Area [mAU*s] | Height [mAU] | Area %  |
|--------|---------------|------|-------------|--------------|--------------|---------|
| 1      | 9.494         | BV R | 0.1456      | 1288.26501   | 135.75891    | 51.0988 |
| 2      | 10.215        | VB   | 0.1566      | 1232.85950   | 123.40372    | 48.9012 |

Totals : 2521.12451 259.16264

### Enantioenriched

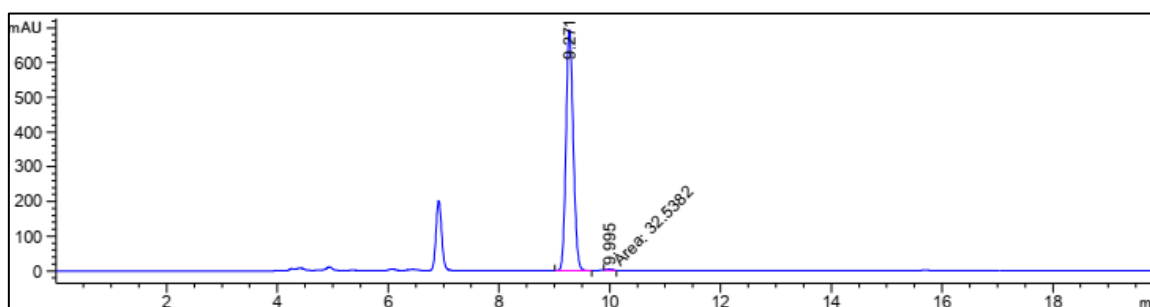



## SUPPORTING INFORMATION

| Peak #   | RetTime [min] | Type | Width [min] | Area [mAU*s] | Height [mAU] | Area %  |
|----------|---------------|------|-------------|--------------|--------------|---------|
| 1        | 9.271         | BB   | 0.1423      | 6316.11670   | 693.52704    | 99.4875 |
| 2        | 9.995         | MM   | 0.1433      | 32.53820     | 3.78506      | 0.5125  |
| Totals : |               |      |             | 6348.65490   | 697.31210    |         |

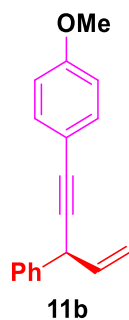

Colorless oil. 80.4 mg, 81% yield.

**<sup>1</sup>H NMR** (600 MHz, CDCl<sub>3</sub>) δ 7.43 (d, *J* = 7.6 Hz, 2H), 7.40 (d, *J* = 8.8 Hz, 2H), 7.35 (t, *J* = 7.6 Hz, 2H), 7.27 – 7.23 (m, 1H), 6.83 (d, *J* = 8.6 Hz, 2H), 6.00 (ddd, *J* = 16.4, 9.9, 6.1 Hz, 1H), 5.44 (d, *J* = 16.9 Hz, 1H), 5.17 (d, *J* = 9.8 Hz, 1H), 4.57 (d, *J* = 6.2 Hz, 1H), 3.80 (s, 3H).

**<sup>13</sup>C NMR** (100 MHz, CDCl<sub>3</sub>) δ 159.37, 140.37, 138.14, 133.05, 128.63, 127.69, 126.97, 115.65, 115.13, 113.85, 87.10, 85.13, 55.29, 42.01.

**HPLC:** Daicel Chiralcel® OJ-H, 5% *i*PrOH, 95% hexane, 0.7 mL/min, 40 °C, 220 nm; 96% *ee* (*t<sub>R</sub>* (major) = 16.95 min, *t<sub>R</sub>* (minor) = 23.73 min).

### Racemic

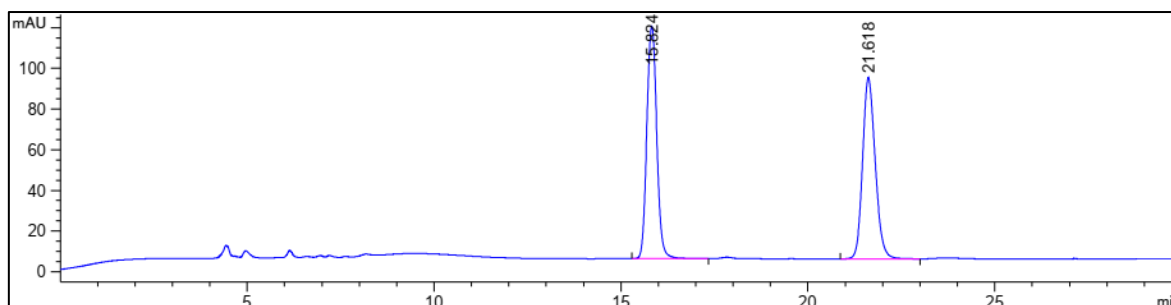

| Peak #   | RetTime [min] | Type | Width [min] | Area [mAU*s] | Height [mAU] | Area %  |
|----------|---------------|------|-------------|--------------|--------------|---------|
| 1        | 15.824        | BB   | 0.2909      | 2102.51221   | 114.13593    | 50.0980 |
| 2        | 21.618        | BB   | 0.3599      | 2094.28369   | 89.21770     | 49.9020 |
| Totals : |               |      |             | 4196.79590   | 203.35363    |         |

## SUPPORTING INFORMATION

### Enantioenriched

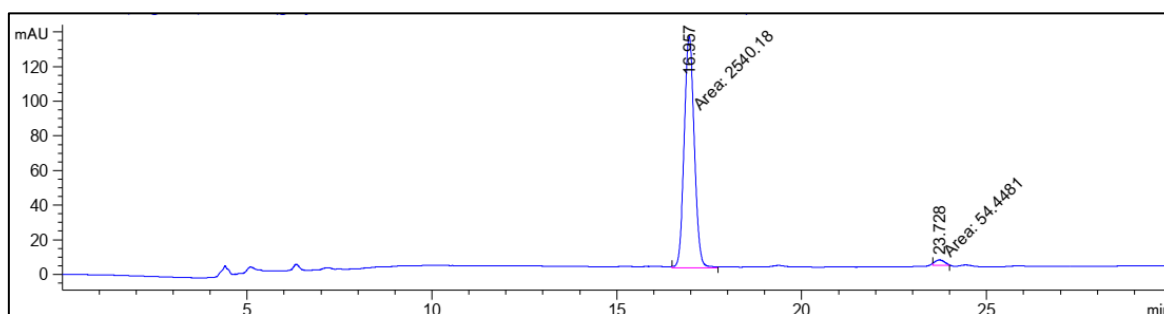

| Peak #   | RetTime [min] | Type | Width [min] | Area [mAU*s] | Height [mAU] | Area %  |
|----------|---------------|------|-------------|--------------|--------------|---------|
| 1        | 16.957        | MM   | 0.3170      | 2540.18237   | 133.55299    | 97.9015 |
| 2        | 23.728        | MM   | 0.2965      | 54.44814     | 3.06016      | 2.0985  |
| Totals : |               |      |             | 2594.63051   | 136.61316    |         |

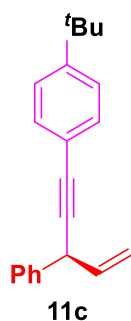

Colorless oil. 76.8 mg, 70% yield.

**<sup>1</sup>H NMR** (400 MHz, CDCl<sub>3</sub>) δ 7.50 – 7.41 (m, 4H), 7.41 – 7.33 (m, 4H), 7.32 – 7.26 (m, 1H), 6.03 (ddd, *J* = 16.8, 9.9, 6.1 Hz, 1H), 5.48 (dt, *J* = 16.9, 1.4 Hz, 1H), 5.21 (dt, *J* = 9.9, 1.4 Hz, 1H), 4.61 (d, *J* = 6.0 Hz, 1H), 1.34 (s, 9H).

**<sup>13</sup>C NMR** (100 MHz, CDCl<sub>3</sub>) δ 151.20, 140.31, 138.08, 131.40, 128.64, 127.70, 126.98, 125.24, 120.49, 115.15, 87.91, 85.43, 42.01, 34.74, 31.21.

**HPLC:** Daicel Chiralcel® OJ-H, 0.5% *i*PrOH, 99.5% hexane, 0.7 mL/min, 40 °C, 220 nm; 99% *ee* (*t*<sub>R</sub> (major) = 9.98 min, *t*<sub>R</sub>(minor) = 9.60 min).

## SUPPORTING INFORMATION

### *Racemic*

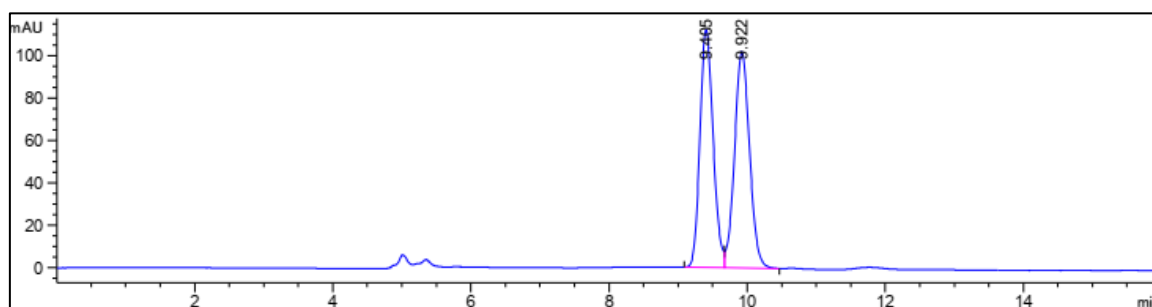

| Peak # | RetTime [min] | Type | Width [min] | Area [mAU*s] | Height [mAU] | Area %  |
|--------|---------------|------|-------------|--------------|--------------|---------|
| 1      | 9.405         | BV   | 0.2071      | 1488.04211   | 111.96686    | 49.0649 |
| 2      | 9.922         | VB   | 0.2326      | 1544.76270   | 102.03087    | 50.9351 |

Totals : 3032.80481 213.99773

### *Enantioenriched*

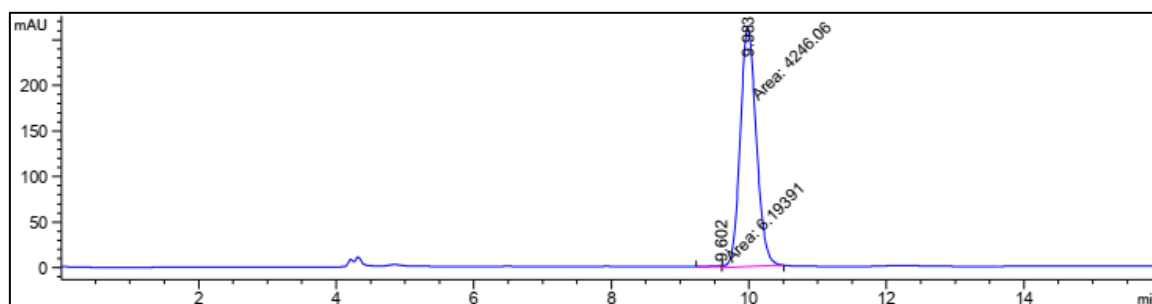

| Peak # | RetTime [min] | Type | Width [min] | Area [mAU*s] | Height [mAU] | Area %  |
|--------|---------------|------|-------------|--------------|--------------|---------|
| 1      | 9.602         | MM   | 0.1278      | 6.19391      | 8.07729e-1   | 0.1457  |
| 2      | 9.983         | MM   | 0.2699      | 4246.05811   | 262.18356    | 99.8543 |

Totals : 4252.25202 262.99129

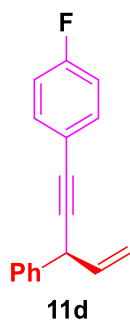

Colorless oil. 70.8 mg, 75% yield.  $[\alpha]_D^{29}$ :  $-43.7$  ( $c = 2.0$ ,  $\text{CHCl}_3$ ).

## SUPPORTING INFORMATION

$^1\text{H}$  NMR (400 MHz,  $\text{CDCl}_3$ )  $\delta$  7.49 – 7.39 (m, 4H), 7.36 (t,  $J = 7.6$  Hz, 2H), 7.30 – 7.23 (m, 1H), 6.99 (t,  $J = 8.7$  Hz, 2H), 5.99 (ddd,  $J = 16.9, 9.9, 6.1$  Hz, 1H), 5.44 (dt,  $J = 16.9, 1.5$  Hz, 1H), 5.19 (dt,  $J = 9.8, 1.4$  Hz, 1H), 4.57 (d,  $J = 6.1$  Hz, 1H).

$^{13}\text{C}$  NMR (100 MHz,  $\text{CDCl}_3$ )  $\delta$  162.34 (d,  $J = 248.8$  Hz), 140.04, 137.80, 133.52 (d,  $J = 8.3$  Hz), 128.71, 127.67, 127.10, 119.53 (d,  $J = 3.6$  Hz), 115.59, 115.36 (d,  $J = 3.3$  Hz), 88.33, 84.23, 41.92.

$^{19}\text{F}$  NMR (376 MHz,  $\text{CDCl}_3$ )  $\delta$  -111.59.

HRMS (APCI):  $[\text{M}]^+$  Calcd. for  $[\text{C}_{17}\text{H}_{13}\text{F}]^+$  236.0996, found 236.1000.

IR (neat): 3065, 3020, 2978, 2203, 1599, 1506, 1452, 1215, 1155, 837, 752, 698, 667  $\text{cm}^{-1}$ .

HPLC: Daicel Chiralcel<sup>®</sup> OJ-H, 5% *i*PrOH, 95% hexane, 0.7 mL/min, 40 °C, 220 nm; 99% *ee* ( $t_{\text{R}}$  (major) = 9.56 min,  $t_{\text{R}}$ (minor) = 11.75 min).

### Racemic

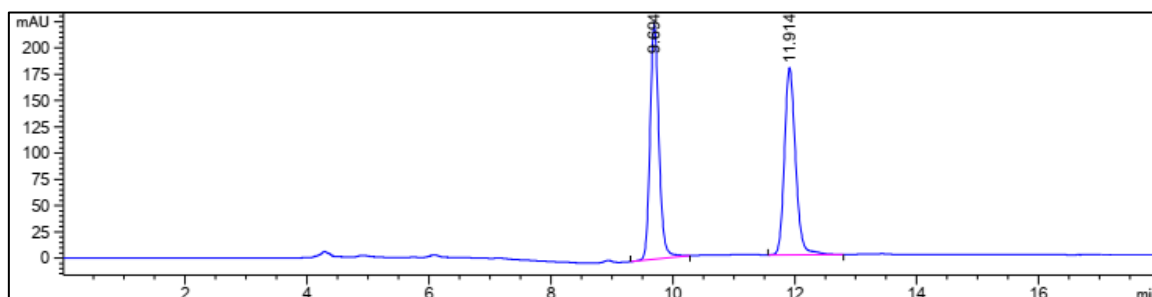

| Peak # | RetTime [min] | Type | Width [min] | Area [mAU*s] | Height [mAU] | Area %  |
|--------|---------------|------|-------------|--------------|--------------|---------|
| 1      | 9.694         | BB   | 0.1560      | 2260.02466   | 223.42888    | 50.1592 |
| 2      | 11.914        | BB   | 0.1935      | 2245.67603   | 177.66737    | 49.8408 |

Totals : 4505.70068 401.09625

### Enantioenriched

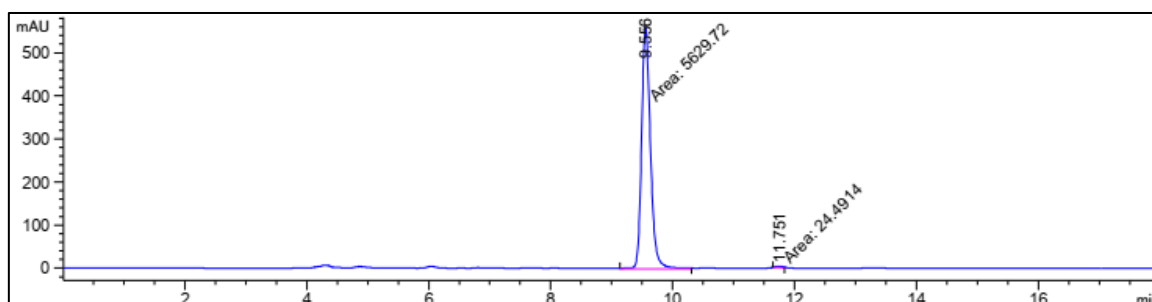

| Peak # | RetTime [min] | Type | Width [min] | Area [mAU*s] | Height [mAU] | Area %  |
|--------|---------------|------|-------------|--------------|--------------|---------|
| 1      | 9.556         | MM   | 0.1684      | 5629.71973   | 557.02747    | 99.5668 |
| 2      | 11.751        | MM   | 0.1328      | 24.49144     | 3.07461      | 0.4332  |

Totals : 5654.21117 560.10208

## SUPPORTING INFORMATION

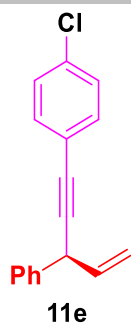

Colorless oil. 66.5 mg, 66% yield.  $[\alpha]_D^{29}$ :  $-69.4$  ( $c = 2.0$ ,  $\text{CHCl}_3$ ) (lit<sup>[4]</sup>:  $[\alpha]_D^{29}$ :  $-66.6$  ( $c = 2.0$ ,  $\text{CHCl}_3$ )).  
 $^{13}\text{C}$  NMR (150 MHz,  $\text{CDCl}_3$ )  $\delta$  139.91, 137.67, 133.97, 132.92, 128.72, 128.57, 127.66, 127.14, 121.98, 115.42, 89.75, 84.20, 41.96.

**HPLC**: Daicel Chiralcel<sup>®</sup> OJ-H, 5% *i*PrOH, 95% hexane, 0.7 mL/min, 40 °C, 220 nm; 99% *ee* ( $t_R$  (major) = 8.20 min,  $t_R$ (minor) = 9.47 min).

### Racemic

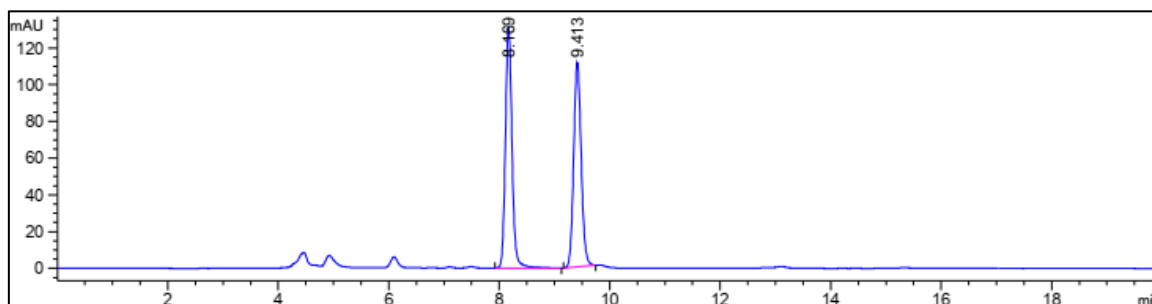

| Peak # | RetTime [min] | Type | Width [min] | Area [mAU*s] | Height [mAU] | Area %  |
|--------|---------------|------|-------------|--------------|--------------|---------|
| 1      | 8.169         | BB   | 0.1271      | 1087.18237   | 130.65259    | 50.9298 |
| 2      | 9.413         | BB   | 0.1456      | 1047.48816   | 111.48887    | 49.0702 |

Totals : 2134.67053 242.14146

### Enantioenriched

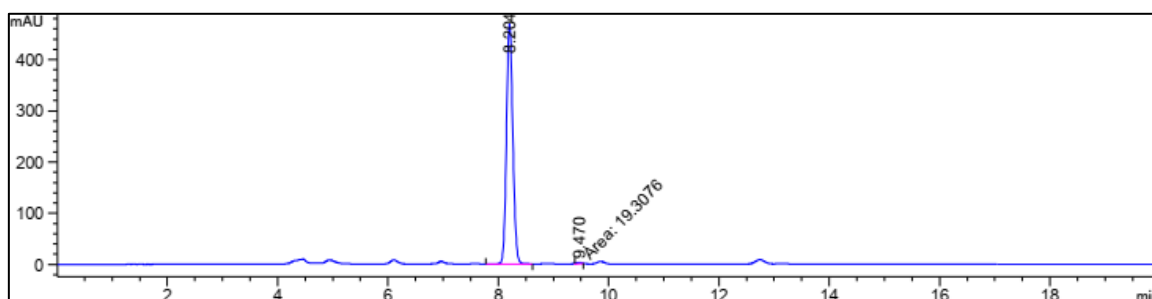

## SUPPORTING INFORMATION

| Peak #   | RetTime [min] | Type | Width [min] | Area [mAU*s] | Height [mAU] | Area %  |
|----------|---------------|------|-------------|--------------|--------------|---------|
| 1        | 8.204         | BB   | 0.1225      | 3720.83691   | 469.10587    | 99.4838 |
| 2        | 9.470         | MM   | 0.1208      | 19.30764     | 2.66430      | 0.5162  |
| Totals : |               |      |             | 3740.14455   | 471.77017    |         |

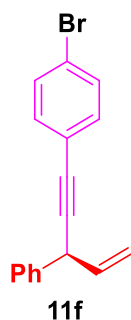

Colorless oil. 61.6 mg, 52% yield.  $[\alpha]_D^{29}$ :  $-38.3$  ( $c = 2.0$ ,  $\text{CHCl}_3$ ).

$^1\text{H NMR}$  (400 MHz,  $\text{CDCl}_3$ )  $\delta$  7.46 – 7.39 (m, 4H), 7.38 – 7.24 (m, 5H), 5.99 (ddd,  $J = 16.9, 9.8, 6.1$  Hz, 1H), 5.43 (dt,  $J = 16.9, 1.4$  Hz, 1H), 5.19 (dt,  $J = 9.8, 1.4$  Hz, 1H), 4.56 (d,  $J = 6.1$  Hz, 1H).

$^{13}\text{C NMR}$  (100 MHz,  $\text{CDCl}_3$ )  $\delta$  139.87, 137.63, 133.15, 131.50, 128.73, 127.67, 127.15, 122.45, 122.16, 115.44, 89.96, 84.26, 41.98.

**HRMS** (APCI):  $[\text{M}]^+$  Calcd. for  $[\text{C}_{17}\text{H}_{13}\text{Br}]^+$  296.0196, found 296.0200.

**IR** (neat): 3063, 3020, 2928, 2203, 1639, 1585, 1485, 1215, 1070, 1011, 926, 825, 748, 698, 667  $\text{cm}^{-1}$ .

**HPLC**: Daicel Chiralcel® OJ-H, 5%  $i$ PrOH, 95% hexane, 0.7 mL/min, 40 °C, 220 nm; 99% *ee* ( $t_R$  (major) = 8.82 min,  $t_R$  (minor) = 10.09 min).

### Racemic

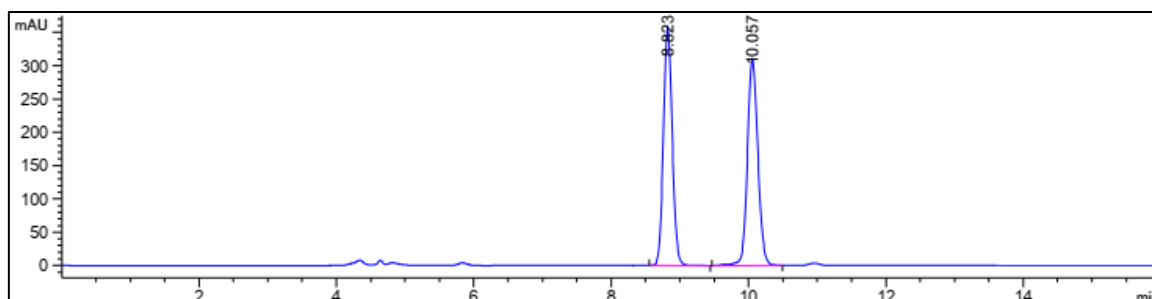

| Peak #   | RetTime [min] | Type | Width [min] | Area [mAU*s] | Height [mAU] | Area %  |
|----------|---------------|------|-------------|--------------|--------------|---------|
| 1        | 8.823         | BB   | 0.1382      | 3194.30542   | 357.58911    | 49.3361 |
| 2        | 10.057        | BB   | 0.1633      | 3280.27783   | 310.31012    | 50.6639 |
| Totals : |               |      |             | 6474.58325   | 667.89923    |         |

## SUPPORTING INFORMATION

### Enantioenriched

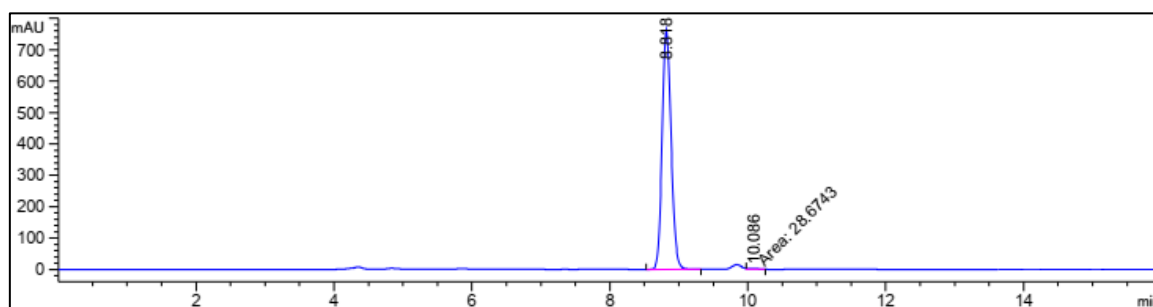

| Peak #   | RetTime [min] | Type | Width [min] | Area [mAU*s] | Height [mAU] | Area %  |
|----------|---------------|------|-------------|--------------|--------------|---------|
| 1        | 8.818         | BB   | 0.1395      | 6907.74609   | 764.23743    | 99.5866 |
| 2        | 10.086        | MM   | 0.1728      | 28.67433     | 2.76591      | 0.4134  |
| Totals : |               |      |             | 6936.42042   | 767.00334    |         |

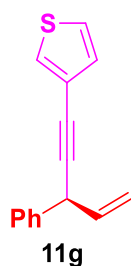

Colorless oil. 62.7 mg, 70% yield.

$^1\text{H NMR}$  (400 MHz,  $\text{CDCl}_3$ )  $\delta$  7.47 – 7.38 (m, 3H), 7.39 – 7.30 (m, 2H), 7.29 – 7.21 (m, 2H), 7.12 (dd,  $J = 5.0, 1.2$  Hz, 1H), 5.99 (ddd,  $J = 16.9, 9.9, 6.1$  Hz, 1H), 5.43 (dt,  $J = 16.9, 1.5$  Hz, 1H), 5.18 (dt,  $J = 9.9, 1.4$  Hz, 1H), 4.56 (d,  $J = 6.1$  Hz, 1H).

$^{13}\text{C NMR}$  (100 MHz,  $\text{CDCl}_3$ )  $\delta$  140.09, 137.86, 130.06, 128.69, 128.26, 127.71, 127.07, 125.14, 122.46, 115.34, 88.21, 80.36, 42.01.

**HPLC:** Daicel Chiralcel<sup>®</sup> OJ-H, 5%  $i$ PrOH, 95% hexane, 0.7 mL/min, 40 °C, 220 nm; 97% *ee* ( $t_{\text{R}}$  (major) = 12.58 min,  $t_{\text{R}}$  (minor) = 14.61 min).

### Racemic

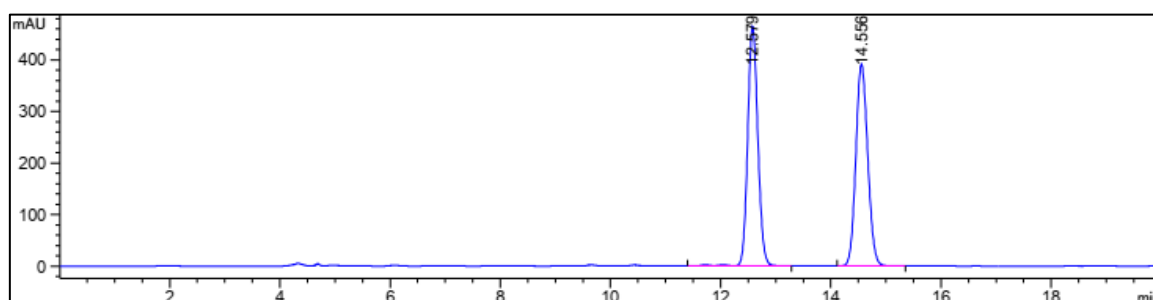

## SUPPORTING INFORMATION

| Peak #   | RetTime [min] | Type | Width [min] | Area [mAU*s] | Height [mAU] | Area %  |
|----------|---------------|------|-------------|--------------|--------------|---------|
| 1        | 12.579        | VB R | 0.1962      | 5956.21240   | 464.37054    | 50.3978 |
| 2        | 14.556        | BB   | 0.2326      | 5862.19141   | 391.59781    | 49.6022 |
| Totals : |               |      |             | 1.18184e4    | 855.96835    |         |

### Enantioenriched

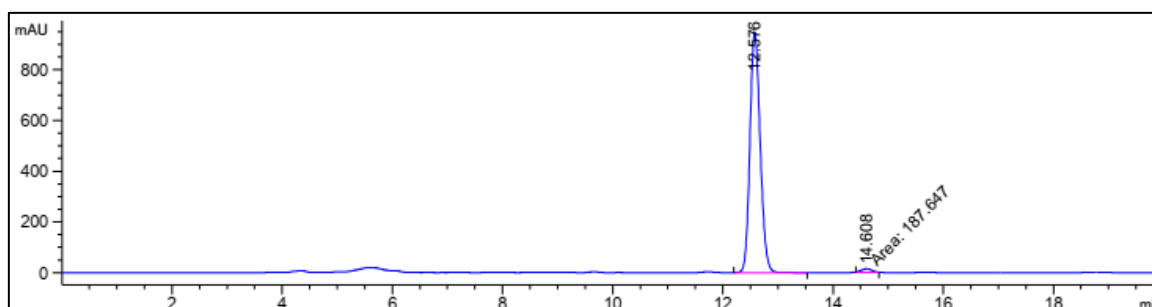

| Peak #   | RetTime [min] | Type | Width [min] | Area [mAU*s] | Height [mAU] | Area %  |
|----------|---------------|------|-------------|--------------|--------------|---------|
| 1        | 12.576        | BB   | 0.2008      | 1.22444e4    | 947.32043    | 98.4906 |
| 2        | 14.608        | MM   | 0.2237      | 187.64713    | 13.98213     | 1.5094  |
| Totals : |               |      |             | 1.24320e4    | 961.30256    |         |

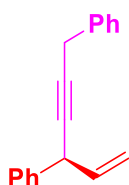

11h

Colorless oil. 30.6 mg, 33% yield.  $[\alpha]_D^{29}$ :  $-19.8$  ( $c = 2.0$ ,  $\text{CHCl}_3$ ).

$^1\text{H NMR}$  (400 MHz,  $\text{CDCl}_3$ )  $\delta$  7.43 – 7.28 (m, 8H), 7.27 – 7.19 (m, 2H), 5.95 (ddd,  $J = 16.6, 9.9, 6.1$  Hz, 1H), 5.39 (dt,  $J = 16.8, 1.6$  Hz, 1H), 5.13 (dt,  $J = 9.9, 1.5$  Hz, 1H), 4.42 (dd,  $J = 4.1, 2.0$  Hz, 1H), 3.70 (d,  $J = 2.3$  Hz, 2H).

$^{13}\text{C NMR}$  (100 MHz,  $\text{CDCl}_3$ )  $\delta$  140.59, 138.42, 137.19, 128.60, 128.49, 127.90, 127.65, 126.91, 126.51, 114.97, 82.84, 81.43, 41.60, 25.31.

**HRMS** (APCI):  $[\text{M}]^+$  Calcd. for  $[\text{C}_{18}\text{H}_{16}]^+$  232.1247, found 232.1252.

**IR** (neat): 3063, 3032, 2922, 2237, 1730, 1643, 1599, 1493, 1452, 1269, 1208, 923, 756, 733, 698  $\text{cm}^{-1}$ .

**HPLC**: Daicel Chiralcel<sup>®</sup> OJ-H, 5% *i*PrOH, 95% hexane, 0.7 mL/min, 40 °C, 220 nm; 98% *ee* ( $t_R$  (major) = 14.38 min,  $t_R$  (minor) = 12.44 min).



## SUPPORTING INFORMATION

### Racemic

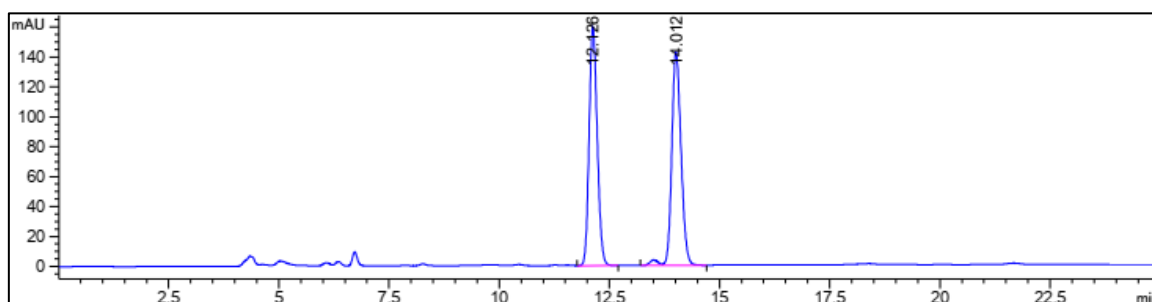

| Peak # | RetTime [min] | Type | Width [min] | Area [mAU*s] | Height [mAU] | Area %  |
|--------|---------------|------|-------------|--------------|--------------|---------|
| 1      | 12.126        | BB   | 0.1993      | 2041.53931   | 159.48875    | 49.1826 |
| 2      | 14.012        | VB R | 0.2245      | 2109.39917   | 142.68480    | 50.8174 |

Totals : 4150.93848 302.17355

### Enantioenriched

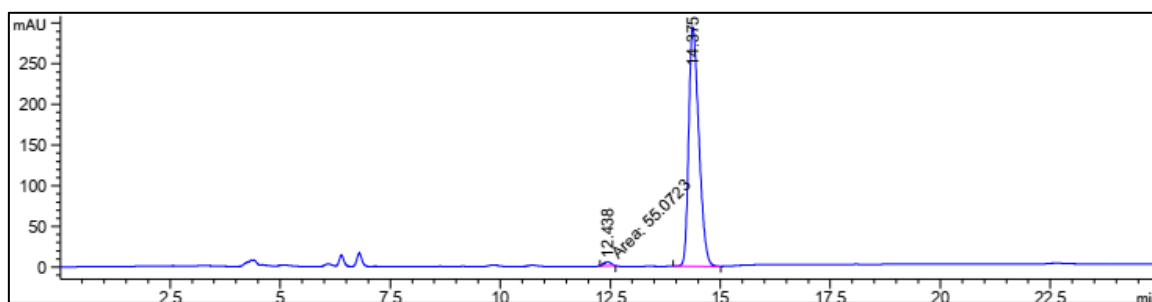

| Peak # | RetTime [min] | Type | Width [min] | Area [mAU*s] | Height [mAU] | Area %  |
|--------|---------------|------|-------------|--------------|--------------|---------|
| 1      | 12.438        | MM   | 0.1861      | 55.07228     | 4.93144      | 1.1561  |
| 2      | 14.375        | BB   | 0.2472      | 4708.69580   | 293.51111    | 98.8439 |

Totals : 4763.76808 298.44255

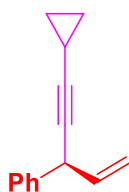

11i

Colorless oil. 50.2 mg, 69% yield.

$^1\text{H NMR}$  (400 MHz,  $\text{CDCl}_3$ )  $\delta$  7.37 – 7.27 (m, 4H), 7.26 – 7.18 (m, 1H), 5.89 (ddd,  $J = 16.9, 9.9, 6.2$  Hz, 1H), 5.32 (dt,  $J = 16.9, 1.5$  Hz, 1H), 5.10 (dt,  $J = 9.8, 1.5$  Hz, 1H), 4.30 (dd,  $J = 6.1, 1.8$  Hz, 1H), 1.35 – 1.25 (m, 1H), 0.80 – 0.71 (m, 2H), 0.73 – 0.65 (m, 2H).

## SUPPORTING INFORMATION

$^{13}\text{C}$  NMR (100 MHz,  $\text{CDCl}_3$ )  $\delta$  141.01, 138.92, 128.81, 127.86, 127.09, 114.98, 88.83, 74.54, 41.75, 8.54, 8.52.

**HPLC:** Daicel Chiralcel<sup>®</sup> OJ-H, 5% *i*PrOH, 95% hexane, 0.7 mL/min, 40 °C, 220 nm; 98% *ee* ( $t_{\text{R}}$  (major) = 9.86 min,  $t_{\text{R}}$ (minor) = 10.56 min).

### *Racemic*

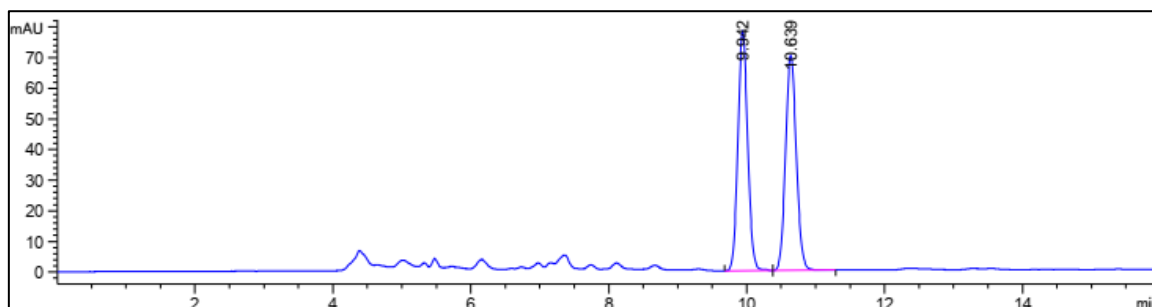

| Peak #   | RetTime [min] | Type | Width [min] | Area [mAU*s] | Height [mAU] | Area %  |
|----------|---------------|------|-------------|--------------|--------------|---------|
| 1        | 9.942         | BB   | 0.1533      | 772.03949    | 78.09308     | 50.3387 |
| 2        | 10.639        | BB   | 0.1685      | 761.65063    | 70.23734     | 49.6613 |
| Totals : |               |      |             | 1533.69012   | 148.33042    |         |

### *Enantioenriched*

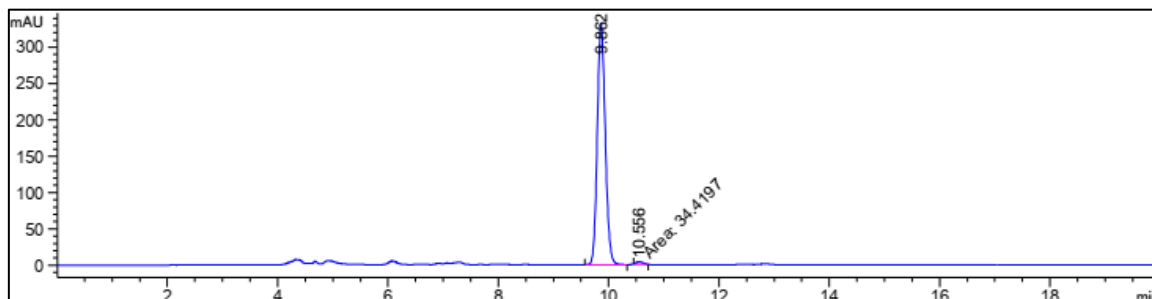

| Peak #   | RetTime [min] | Type | Width [min] | Area [mAU*s] | Height [mAU] | Area %  |
|----------|---------------|------|-------------|--------------|--------------|---------|
| 1        | 9.862         | BB   | 0.1553      | 3326.27954   | 330.72723    | 98.9758 |
| 2        | 10.556        | MM   | 0.1571      | 34.41967     | 3.65092      | 1.0242  |
| Totals : |               |      |             | 3360.69921   | 334.37815    |         |



## SUPPORTING INFORMATION

| Peak #   | RetTime [min] | Type | Width [min] | Area [mAU*s] | Height [mAU] | Area %  |
|----------|---------------|------|-------------|--------------|--------------|---------|
| 1        | 13.980        | MM   | 0.1980      | 13.99014     | 1.17753      | 0.2968  |
| 2        | 14.419        | MM   | 0.2964      | 4699.84814   | 264.25183    | 99.7032 |
| Totals : |               |      |             | 4713.83828   | 265.42937    |         |

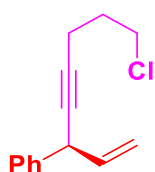

**11k**

Colorless oil. 33.1 mg, 38% yield.

$^1\text{H NMR}$  (400 MHz,  $\text{CDCl}_3$ )  $\delta$  7.38 – 7.29 (m, 4H), 7.27 – 7.21 (m, 1H), 5.91 (ddd,  $J = 16.9, 9.9, 6.1$  Hz, 1H), 5.34 (dt,  $J = 16.8, 1.5$  Hz, 1H), 5.12 (dt,  $J = 9.8, 1.4$  Hz, 1H), 4.38 – 4.28 (m, 1H), 3.66 (t,  $J = 6.4$  Hz, 2H), 2.47 (td,  $J = 6.8, 2.3$  Hz, 2H), 1.99 (p,  $J = 6.6$  Hz, 2H).

$^{13}\text{C NMR}$  (100 MHz,  $\text{CDCl}_3$ )  $\delta$  140.55, 138.42, 128.60, 127.54, 126.92, 114.84, 83.37, 80.24, 43.79, 41.46, 31.65, 16.39.

**HPLC:** Daicel Chiralcel<sup>®</sup> OJ-H, 5% *i*PrOH, 95% hexane, 0.7 mL/min, 40 °C, 220 nm; 99% *ee* ( $t_{\text{R}}$  (major) = 9.39 min,  $t_{\text{R}}$ (minor) = 8.82 min).

### Racemic

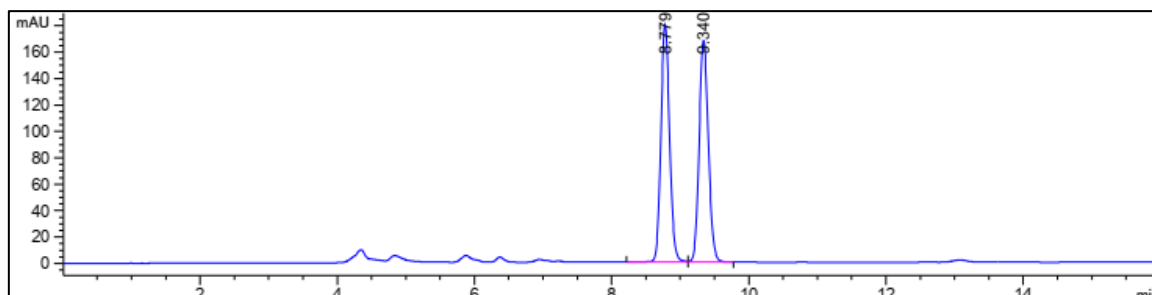

| Peak #   | RetTime [min] | Type | Width [min] | Area [mAU*s] | Height [mAU] | Area %  |
|----------|---------------|------|-------------|--------------|--------------|---------|
| 1        | 8.779         | BV   | 0.1363      | 1576.14478   | 179.79816    | 50.1491 |
| 2        | 9.340         | VB   | 0.1448      | 1566.77307   | 168.01320    | 49.8509 |
| Totals : |               |      |             | 3142.91785   | 347.81136    |         |



# SUPPORTING INFORMATION

## Racemic

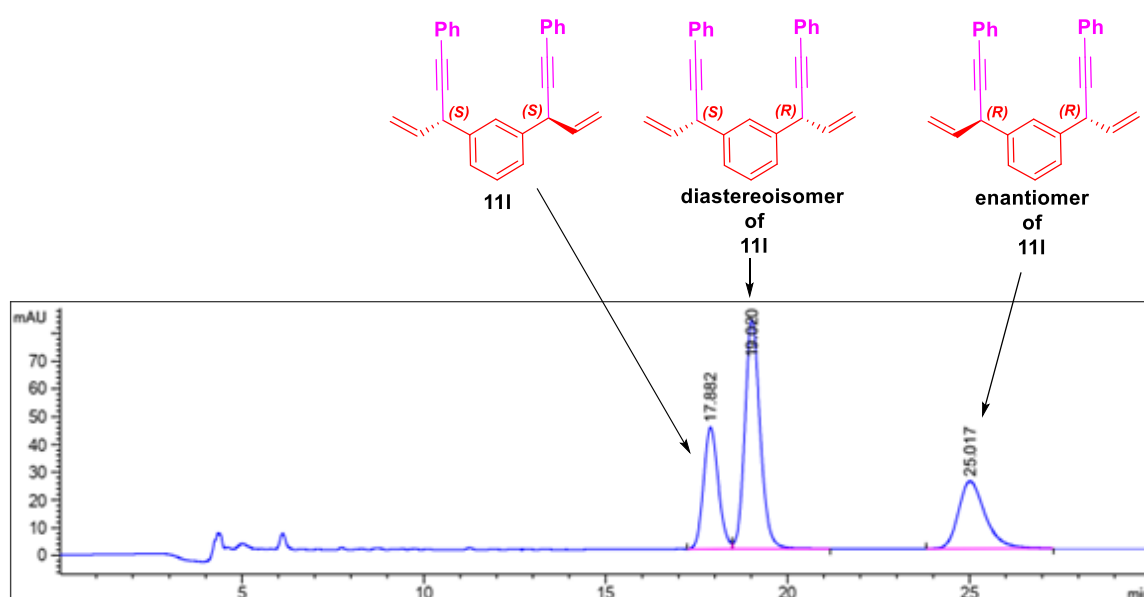

| Peak # | RetTime [min] | Type | Width [min] | Area [mAU*s] | Height [mAU] | Area %  |
|--------|---------------|------|-------------|--------------|--------------|---------|
| 1      | 17.882        | BV   | 0.4371      | 1235.99634   | 43.81936     | 25.2751 |
| 2      | 19.020        | VB   | 0.4497      | 2415.48242   | 82.48162     | 49.3946 |
| 3      | 25.017        | BB   | 0.7499      | 1238.69666   | 24.25213     | 25.3303 |

Totals : 4890.17542 150.55311

## (*S,S*)- Enantioenriched

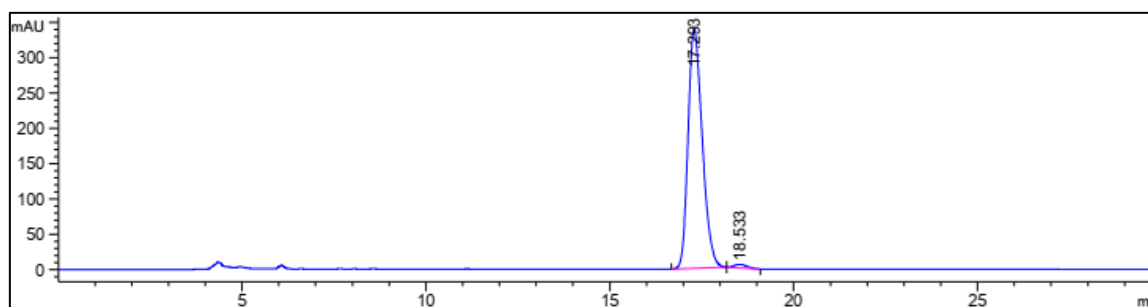

| Peak # | RetTime [min] | Type | Width [min] | Area [mAU*s] | Height [mAU] | Area %  |
|--------|---------------|------|-------------|--------------|--------------|---------|
| 1      | 17.293        | BB   | 0.4149      | 9094.74219   | 339.15292    | 98.6857 |
| 2      | 18.533        | BB   | 0.3738      | 121.12226    | 5.08692      | 1.3143  |

Totals : 9215.86445 344.23984

## SUPPORTING INFORMATION

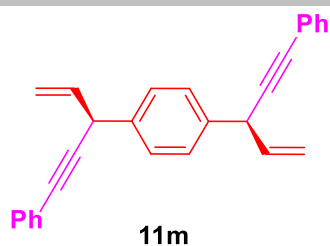

Colorless oil. 80.0 mg, 56% yield.  $[\alpha]_D^{29}$ :  $-116.5$  ( $c = 2.0$ ,  $\text{CHCl}_3$ ).

$^1\text{H NMR}$  (400 MHz,  $\text{Chloroform-}d$ )  $\delta$  7.54 – 7.47 (m, 2H), 7.45 (s, 2H), 7.38 – 7.30 (m, 3H), 6.03 (ddd,  $J = 16.7, 9.9, 6.1$  Hz, 1H), 5.49 (d,  $J = 16.9$  Hz, 1H), 5.22 (d,  $J = 9.9$  Hz, 1H), 4.61 (d,  $J = 6.1$  Hz, 1H).

$^{13}\text{C NMR}$  (100 MHz,  $\text{CDCl}_3$ )  $\delta$  138.97, 137.83, 131.68, 128.23, 127.99, 127.98, 123.47, 115.31, 88.62, 85.33, 41.63.

**HRMS** (APCI):  $[\text{M}]^+$  Calcd. for  $[\text{C}_{28}\text{H}_{22}]^+$  358.1717, found 358.1722.

**IR** (neat): 3080, 3055, 3018, 2928, 2856, 2199, 1636, 1599, 1508, 1491, 1443, 1215, 988, 916, 752, 690  $\text{cm}^{-1}$ .

**HPLC**: Daicel Chiralcel<sup>®</sup> OJ-H, 10%  $i$ PrOH, 90% hexane, 0.7 mL/min, 40 °C, 220 nm; 99% *ee*, 31:1 *dr* ( $t_{\text{R}}$  (major) = 12.06 min,  $t_{\text{R}}$ (minor) = 17.62 min [peak of diastereoisomer]).

### Racemic

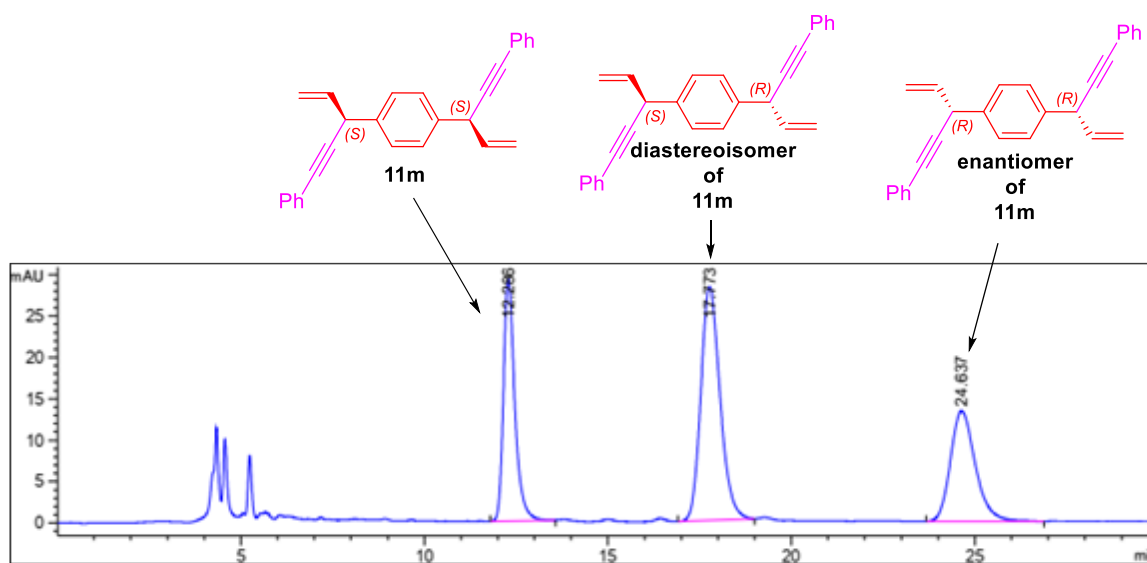

| Peak #   | RetTime [min] | Type | Width [min] | Area [mAU*s] | Height [mAU] | Area %  |
|----------|---------------|------|-------------|--------------|--------------|---------|
| 1        | 12.286        | BB   | 0.3241      | 626.07587    | 29.20801     | 27.4015 |
| 2        | 17.773        | BB   | 0.5563      | 1027.26184   | 28.24463     | 44.9602 |
| 3        | 24.637        | BB   | 0.7039      | 631.48944    | 13.34980     | 27.6384 |
| Totals : |               |      |             | 2284.82715   | 70.80243     |         |

## SUPPORTING INFORMATION

### (*S,S*)- Enantioenriched

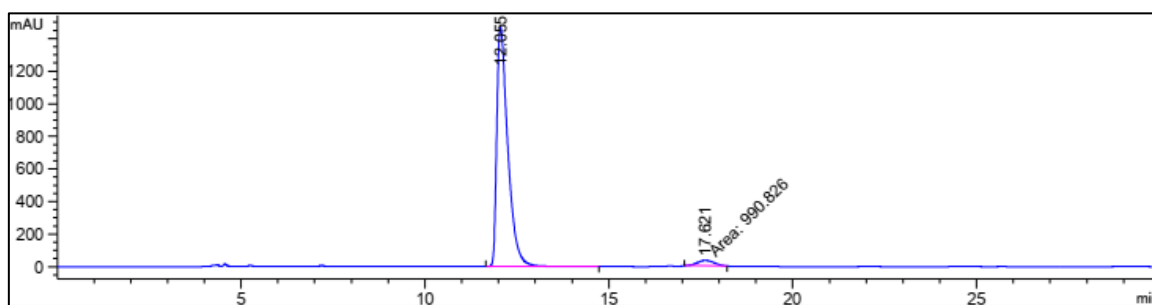

Peak Table

| Peak #   | RetTime [min] | Type | Width [min] | Area [mAU*s] | Height [mAU] | Area %  |
|----------|---------------|------|-------------|--------------|--------------|---------|
| 1        | 12.055        | BB   | 0.3108      | 3.05596e4    | 1468.50818   | 96.8595 |
| 2        | 17.621        | MM   | 0.5101      | 990.82617    | 32.37307     | 3.1405  |
| Totals : |               |      |             | 3.15504e4    | 1500.88125   |         |

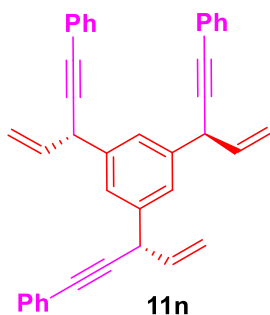

Colorless oil. 109.6 mg, 55% yield.  $[\alpha]_D^{29}$ :  $-82.40$  ( $c = 2.0$ ,  $\text{CHCl}_3$ ).

$^1\text{H NMR}$  (400 MHz,  $\text{CDCl}_3$ )  $\delta$  7.52 – 7.37 (m, 3H), 7.32 – 7.19 (m, 3H), 6.02 (ddd,  $J = 16.3, 9.8, 6.3$  Hz, 1H), 5.47 (dt,  $J = 16.9, 1.5$  Hz, 1H), 5.21 (dt,  $J = 9.8, 1.5$  Hz, 1H), 4.61 (d,  $J = 6.3$  Hz, 1H).

$^{13}\text{C NMR}$  (100 MHz,  $\text{CDCl}_3$ )  $\delta$  140.88, 137.73, 131.70, 128.22, 127.95, 125.83, 123.45, 115.57, 88.54, 85.52, 41.93.

**HRMS** (APCI):  $[\text{M}+\text{H}]^+$  Calcd. for  $[\text{C}_{39}\text{H}_{31}]^+$  **499.2421**, found 499.2424.

**IR** (neat): 3082, 3057, 3018, 2926, 2201, 1639, 1599, 1491, 1445, 1215, 1070, 989, 926, 750, 690  $\text{cm}^{-1}$ .

**HPLC**: Daicel Chiralcel® OJ-H, 20% *i*PrOH, 80% hexane, 0.7 mL/min, 40 °C, 220 nm; 99% *ee*, 43:1 *dr* ( $t_R$  (major) = 7.23 min,  $t_R$ (minor) = 8.56 min [peak of diastereoisomer]).



# SUPPORTING INFORMATION

## Racemic

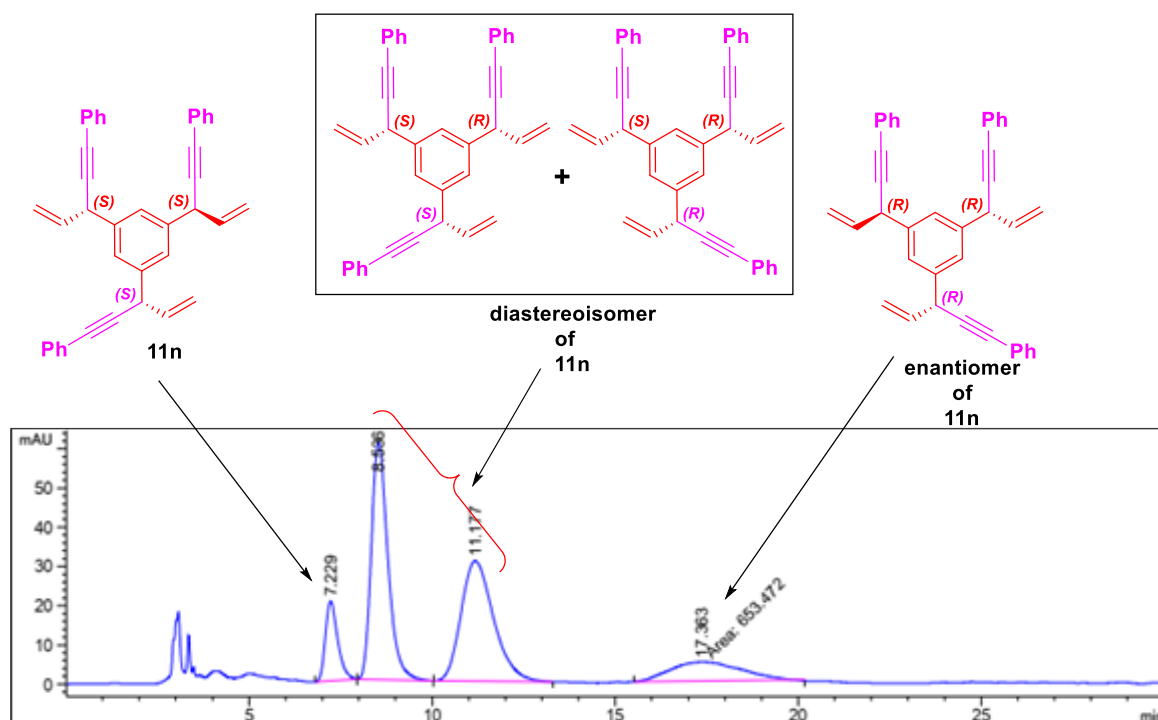

| Peak # | RetTime [min] | Type | Width [min] | Area [mAU*s] | Height [mAU] | Area %  |
|--------|---------------|------|-------------|--------------|--------------|---------|
| 1      | 7.229         | BB   | 0.3587      | 474.38565    | 20.29615     | 9.6029  |
| 2      | 8.536         | BB   | 0.4847      | 1912.61560   | 60.52533     | 38.7167 |
| 3      | 11.177        | BB   | 0.9349      | 1899.55432   | 30.65520     | 38.4523 |
| 4      | 17.363        | MM   | 2.2509      | 653.47205    | 4.83870      | 13.2281 |

Totals : 4940.02762 116.31538

## (S,S,S)- Enantioenriched

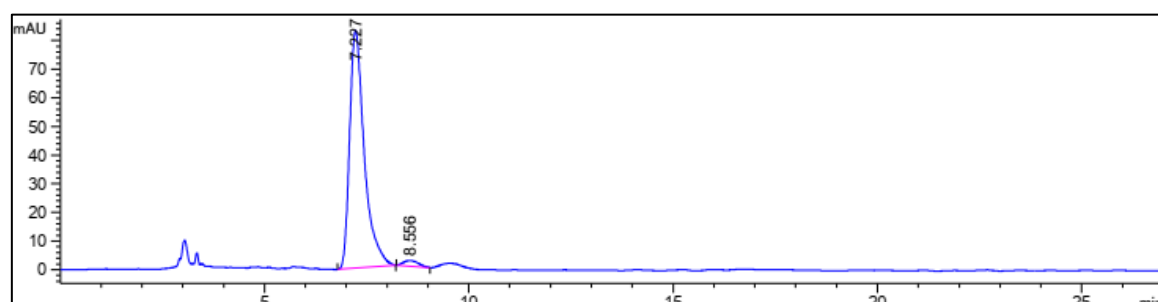

| Peak # | RetTime [min] | Type | Width [min] | Area [mAU*s] | Height [mAU] | Area %  |
|--------|---------------|------|-------------|--------------|--------------|---------|
| 1      | 7.227         | BB   | 0.3753      | 2066.32422   | 82.76975     | 97.7213 |
| 2      | 8.556         | BB   | 0.3508      | 48.18363     | 1.93334      | 2.2787  |

Totals : 2114.50785 84.70310

# SUPPORTING INFORMATION

## Crystallographic Data

### 1) X-ray diffraction of (S,R)-4 (CCDC 2126362)

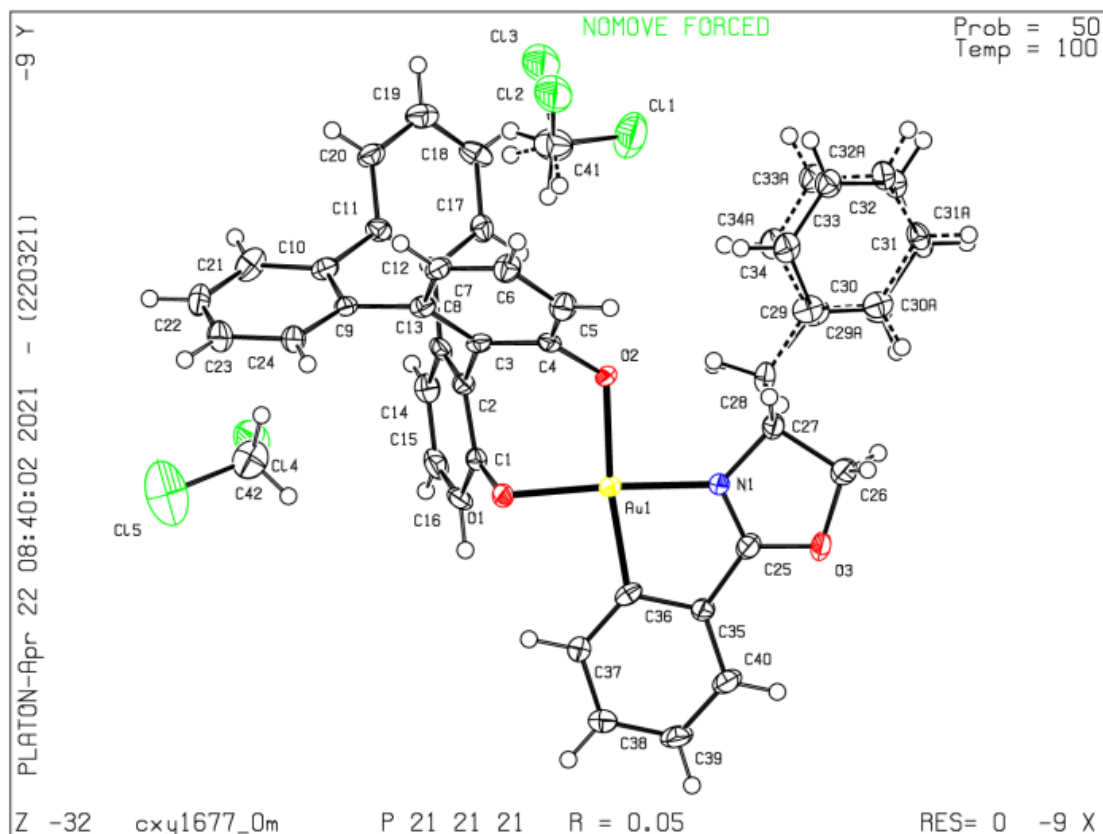

**Table S2 Crystal data and structure refinement for (S,R)-4.**

|                                    |                                                                   |
|------------------------------------|-------------------------------------------------------------------|
| Identification code                | cxy1677_0m                                                        |
| Empirical formula                  | C <sub>42</sub> H <sub>32</sub> AuCl <sub>4</sub> NO <sub>3</sub> |
| Formula weight                     | 937.45                                                            |
| Temperature/K                      | 100                                                               |
| Crystal system                     | orthorhombic                                                      |
| Space group                        | P2 <sub>1</sub> 2 <sub>1</sub> 2 <sub>1</sub>                     |
| a/Å                                | 12.5780(10)                                                       |
| b/Å                                | 13.7123(11)                                                       |
| c/Å                                | 21.0398(15)                                                       |
| α/°                                | 90                                                                |
| β/°                                | 90                                                                |
| γ/°                                | 90                                                                |
| Volume/Å <sup>3</sup>              | 3628.8(5)                                                         |
| Z                                  | 4                                                                 |
| ρ <sub>calc</sub> /cm <sup>3</sup> | 1.716                                                             |
| μ/mm <sup>-1</sup>                 | 4.391                                                             |
| F(000)                             | 1848.0                                                            |
| Crystal size/mm <sup>3</sup>       | 0.35 × 0.32 × 0.28                                                |

## SUPPORTING INFORMATION

|                                                  |                                                                    |
|--------------------------------------------------|--------------------------------------------------------------------|
| Radiation                                        | MoK $\alpha$ ( $\lambda = 0.71073$ )                               |
| 2 $\theta$ range for data collection/ $^{\circ}$ | 4.394 to 56.886                                                    |
| Index ranges                                     | $-16 \leq h \leq 16$ , $-18 \leq k \leq 18$ , $-28 \leq l \leq 25$ |
| Reflections collected                            | 70184                                                              |
| Independent reflections                          | 9114 [ $R_{\text{int}} = 0.0524$ , $R_{\text{sigma}} = 0.0284$ ]   |
| Data/restraints/parameters                       | 9114/243/482                                                       |
| Goodness-of-fit on $F^2$                         | 1.144                                                              |
| Final R indexes [ $I \geq 2\sigma(I)$ ]          | $R_1 = 0.0493$ , $wR_2 = 0.1205$                                   |
| Final R indexes [all data]                       | $R_1 = 0.0506$ , $wR_2 = 0.1212$                                   |
| Largest diff. peak/hole / $e \text{ \AA}^{-3}$   | 5.10/-4.56                                                         |
| Flack parameter                                  | 0.024(3)                                                           |

### 2) X-ray diffraction of (*R,S*)-4 (CCDC 2126367)

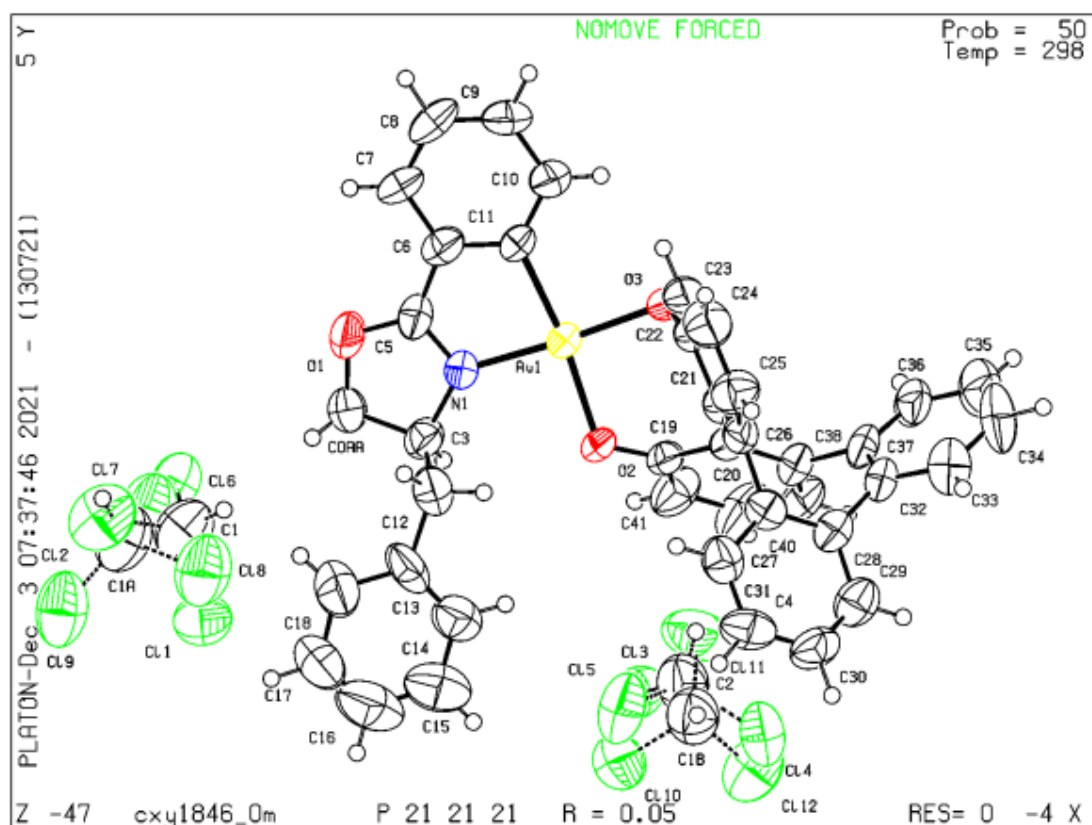

**Table S3 Crystal data and structure refinement for (*R,S*)-4.**

|                     |                                    |
|---------------------|------------------------------------|
| Identification code | cxy1846_0m                         |
| Empirical formula   | $C_{41.17}H_{29.17}AuCl_{3.5}NO_3$ |
| Formula weight      | 906.87                             |
| Temperature/K       | 298                                |
| Crystal system      | orthorhombic                       |
| Space group         | $P2_12_12_1$                       |

## SUPPORTING INFORMATION

---

|                                             |                                                               |
|---------------------------------------------|---------------------------------------------------------------|
| a/Å                                         | 12.999(5)                                                     |
| b/Å                                         | 13.954(4)                                                     |
| c/Å                                         | 22.150(8)                                                     |
| $\alpha$ /°                                 | 90                                                            |
| $\beta$ /°                                  | 90                                                            |
| $\gamma$ /°                                 | 90                                                            |
| Volume/Å <sup>3</sup>                       | 4018(2)                                                       |
| Z                                           | 4                                                             |
| $\rho_{\text{calc}}$ /cm <sup>3</sup>       | 1.499                                                         |
| $\mu$ /mm <sup>-1</sup>                     | 3.931                                                         |
| F(000)                                      | 1783.0                                                        |
| Crystal size/mm <sup>3</sup>                | 0.31 × 0.24 × 0.22                                            |
| Radiation                                   | MoK $\alpha$ ( $\lambda$ = 0.71073)                           |
| 2 $\Theta$ range for data collection/°      | 4.66 to 54.672                                                |
| Index ranges                                | -16 ≤ h ≤ 16, -18 ≤ k ≤ 15, -25 ≤ l ≤ 28                      |
| Reflections collected                       | 37984                                                         |
| Independent reflections                     | 9044 [R <sub>int</sub> = 0.0454, R <sub>sigma</sub> = 0.0479] |
| Data/restraints/parameters                  | 9044/270/550                                                  |
| Goodness-of-fit on F <sup>2</sup>           | 1.071                                                         |
| Final R indexes [I >= 2 $\sigma$ (I)]       | R <sub>1</sub> = 0.0476, wR <sub>2</sub> = 0.1201             |
| Final R indexes [all data]                  | R <sub>1</sub> = 0.0723, wR <sub>2</sub> = 0.1338             |
| Largest diff. peak/hole / e Å <sup>-3</sup> | 1.20/-0.98                                                    |
| Flack parameter                             | -0.013(4)                                                     |

## SUPPORTING INFORMATION

### 3) X-ray diffraction of (*S,S*)-4 (CCDC 2126368)

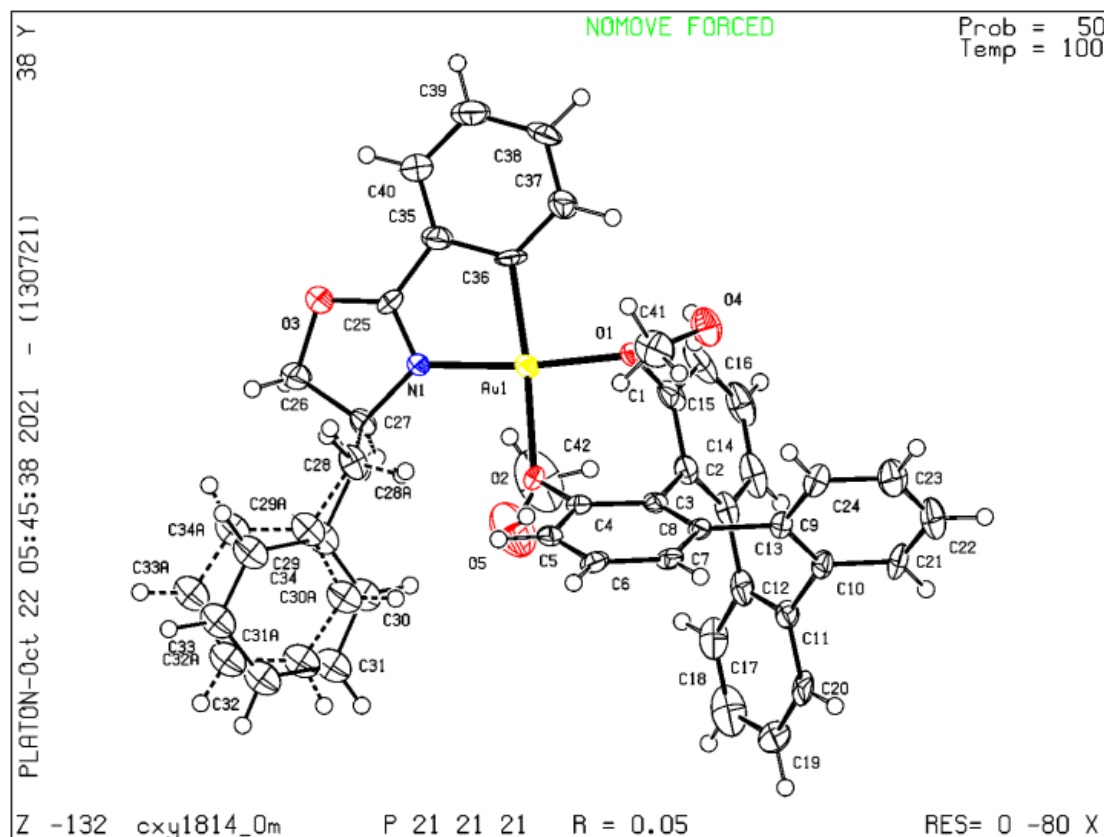

**Table S4 Crystal data and structure refinement for (*S,S*)-4.**

|                                    |                                                   |
|------------------------------------|---------------------------------------------------|
| Identification code                | cxy1814_0m                                        |
| Empirical formula                  | C <sub>42</sub> H <sub>36</sub> AuNO <sub>5</sub> |
| Formula weight                     | 831.68                                            |
| Temperature/K                      | 100                                               |
| Crystal system                     | orthorhombic                                      |
| Space group                        | P2 <sub>1</sub> 2 <sub>1</sub> 2 <sub>1</sub>     |
| a/Å                                | 9.9266(7)                                         |
| b/Å                                | 13.1669(9)                                        |
| c/Å                                | 27.3976(19)                                       |
| α/°                                | 90                                                |
| β/°                                | 90                                                |
| γ/°                                | 90                                                |
| Volume/Å <sup>3</sup>              | 3580.9(4)                                         |
| Z                                  | 4                                                 |
| ρ <sub>calc</sub> /cm <sup>3</sup> | 1.543                                             |
| μ/mm <sup>-1</sup>                 | 4.154                                             |
| F(000)                             | 1656.0                                            |
| Crystal size/mm <sup>3</sup>       | 0.32 × 0.31 × 0.25                                |
| Radiation                          | MoKα (λ = 0.71073)                                |
| 2θ range for data collection/°     | 5.068 to 55.106                                   |
| Index ranges                       | -12 ≤ h ≤ 12, -17 ≤ k ≤ 17, -35 ≤ l ≤ 35          |

## SUPPORTING INFORMATION

|                                                |                                                                  |
|------------------------------------------------|------------------------------------------------------------------|
| Reflections collected                          | 84689                                                            |
| Independent reflections                        | 8230 [ $R_{\text{int}} = 0.0994$ , $R_{\text{sigma}} = 0.0491$ ] |
| Data/restraints/parameters                     | 8230/221/469                                                     |
| Goodness-of-fit on $F^2$                       | 1.260                                                            |
| Final R indexes [ $I \geq 2\sigma(I)$ ]        | $R_1 = 0.0512$ , $wR_2 = 0.1213$                                 |
| Final R indexes [all data]                     | $R_1 = 0.0595$ , $wR_2 = 0.1231$                                 |
| Largest diff. peak/hole / $e \text{ \AA}^{-3}$ | 2.53/-3.12                                                       |
| Flack parameter                                | 0.007(4)                                                         |

### 4) X-ray diffraction of (*R,R*)-4 (CCDC 2126366)

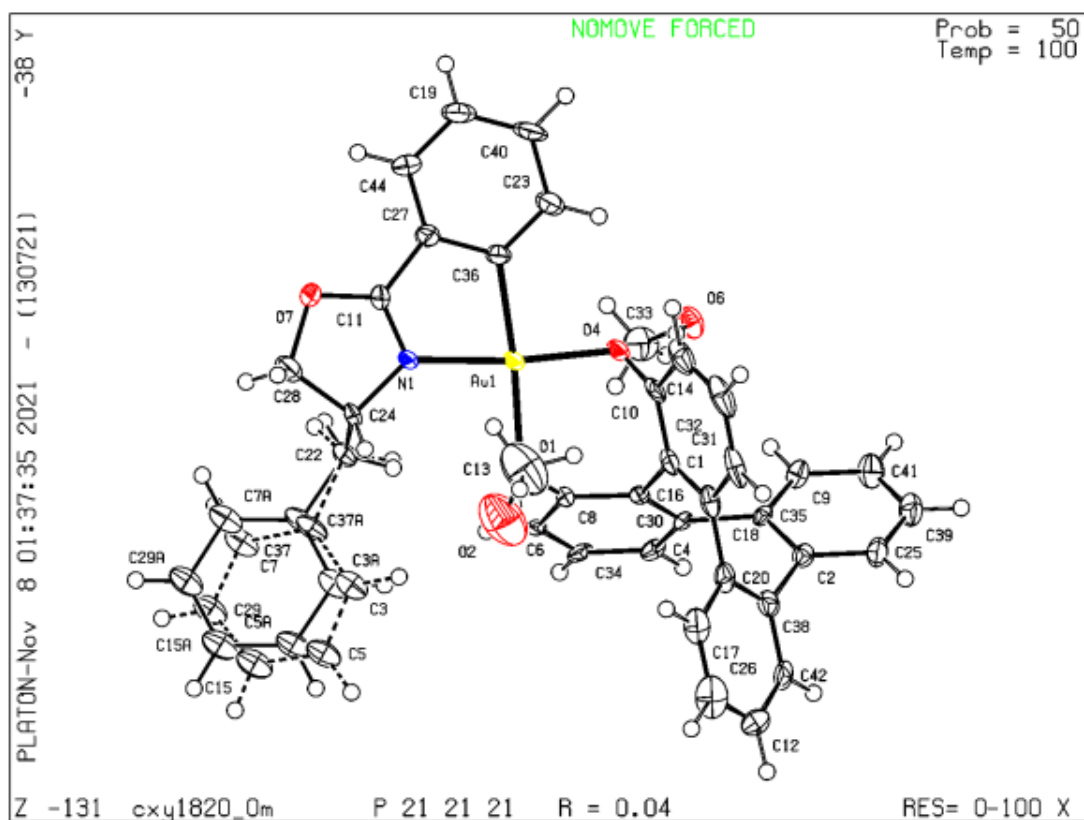

**Table S5 Crystal data and structure refinement for (*R,R*)-4.**

|                     |                                           |
|---------------------|-------------------------------------------|
| Identification code | cxy1820_0m                                |
| Empirical formula   | $\text{AuC}_{43}\text{H}_{40}\text{NO}_6$ |
| Formula weight      | 863.72                                    |
| Temperature/K       | 100                                       |
| Crystal system      | orthorhombic                              |
| Space group         | $P2_12_12_1$                              |
| $a/\text{\AA}$      | 9.9306(6)                                 |
| $b/\text{\AA}$      | 13.2468(9)                                |
| $c/\text{\AA}$      | 27.4297(18)                               |

## SUPPORTING INFORMATION

---

|                                               |                                                               |
|-----------------------------------------------|---------------------------------------------------------------|
| $\alpha/^\circ$                               | 90                                                            |
| $\beta/^\circ$                                | 90                                                            |
| $\gamma/^\circ$                               | 90                                                            |
| Volume/ $\text{\AA}^3$                        | 3608.3(4)                                                     |
| Z                                             | 4                                                             |
| $\rho_{\text{calc}}/\text{g/cm}^3$            | 1.590                                                         |
| $\mu/\text{mm}^{-1}$                          | 4.128                                                         |
| F(000)                                        | 1728.0                                                        |
| Crystal size/ $\text{mm}^3$                   | $0.31 \times 0.24 \times 0.19$                                |
| Radiation                                     | MoK $\alpha$ ( $\lambda = 0.71073$ )                          |
| $2\Theta$ range for data collection/ $^\circ$ | 4.274 to 56.712                                               |
| Index ranges                                  | $-13 \leq h \leq 13, -17 \leq k \leq 17, -36 \leq l \leq 36$  |
| Reflections collected                         | 53502                                                         |
| Independent reflections                       | 8989 [ $R_{\text{int}} = 0.0615, R_{\text{sigma}} = 0.0427$ ] |
| Data/restraints/parameters                    | 8989/192/465                                                  |
| Goodness-of-fit on $F^2$                      | 1.164                                                         |
| Final R indexes [ $I \geq 2\sigma(I)$ ]       | $R_1 = 0.0409, wR_2 = 0.0792$                                 |
| Final R indexes [all data]                    | $R_1 = 0.0455, wR_2 = 0.0804$                                 |
| Largest diff. peak/hole / $e \text{\AA}^{-3}$ | 1.62/-3.40                                                    |
| Flack parameter                               | 0.027(11)                                                     |

## SUPPORTING INFORMATION

### 5) X-ray diffraction of (S)-L1 (CCDC 2124171)

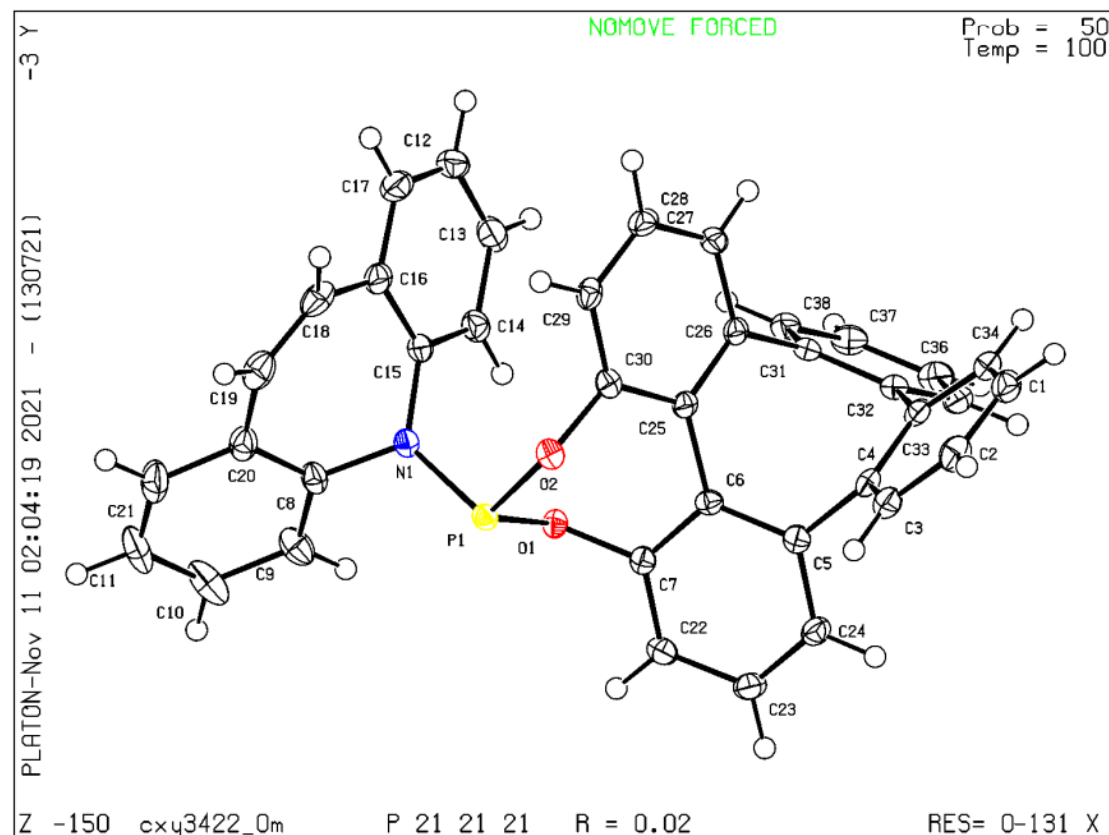

**Table S6 Crystal data and structure refinement for (S)-L1.**

|                                    |                                                   |
|------------------------------------|---------------------------------------------------|
| Identification code                | cxy3422_0m                                        |
| Empirical formula                  | C <sub>38</sub> H <sub>24</sub> NO <sub>2</sub> P |
| Formula weight                     | 557.55                                            |
| Temperature/K                      | 100                                               |
| Crystal system                     | orthorhombic                                      |
| Space group                        | P2 <sub>1</sub> 2 <sub>1</sub> 2 <sub>1</sub>     |
| a/Å                                | 11.8935(6)                                        |
| b/Å                                | 12.6595(6)                                        |
| c/Å                                | 18.8734(10)                                       |
| α/°                                | 90                                                |
| β/°                                | 90                                                |
| γ/°                                | 90                                                |
| Volume/Å <sup>3</sup>              | 2841.7(2)                                         |
| Z                                  | 4                                                 |
| ρ <sub>calc</sub> /cm <sup>3</sup> | 1.303                                             |
| μ/mm <sup>-1</sup>                 | 1.139                                             |
| F(000)                             | 1160.0                                            |
| Crystal size/mm <sup>3</sup>       | 0.35 × 0.31 × 0.26                                |
| Radiation                          | CuKα (λ = 1.54178)                                |
| 2θ range for data collection/°     | 8.41 to 144.7                                     |
| Index ranges                       | -13 ≤ h ≤ 14, -15 ≤ k ≤ 15, -20 ≤ l ≤ 23          |



## SUPPORTING INFORMATION

---

|                                                |                                                                  |
|------------------------------------------------|------------------------------------------------------------------|
| Reflections collected                          | 34083                                                            |
| Independent reflections                        | 5619 [ $R_{\text{int}} = 0.0397$ , $R_{\text{sigma}} = 0.0219$ ] |
| Data/restraints/parameters                     | 5619/0/380                                                       |
| Goodness-of-fit on $F^2$                       | 1.047                                                            |
| Final R indexes [ $I \geq 2\sigma(I)$ ]        | $R_1 = 0.0242$ , $wR_2 = 0.0607$                                 |
| Final R indexes [all data]                     | $R_1 = 0.0250$ , $wR_2 = 0.0610$                                 |
| Largest diff. peak/hole / $e \text{ \AA}^{-3}$ | 0.18/-0.21                                                       |
| Flack parameter                                | -0.002(4)                                                        |

# SUPPORTING INFORMATION

## NMR spectra

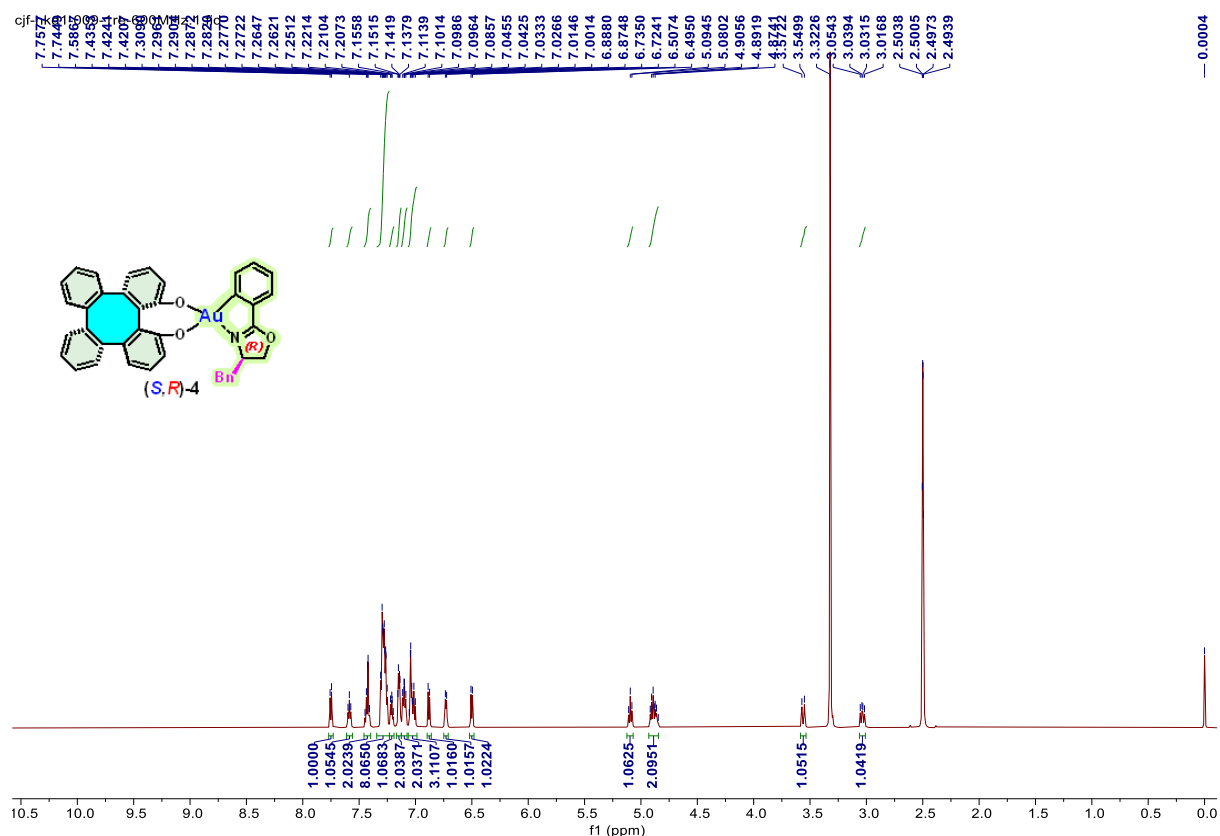

$^1\text{H}$  NMR (600 MHz,  $\text{DMSO-}d_6$ ) spectrum of  $(S,R)$ -4

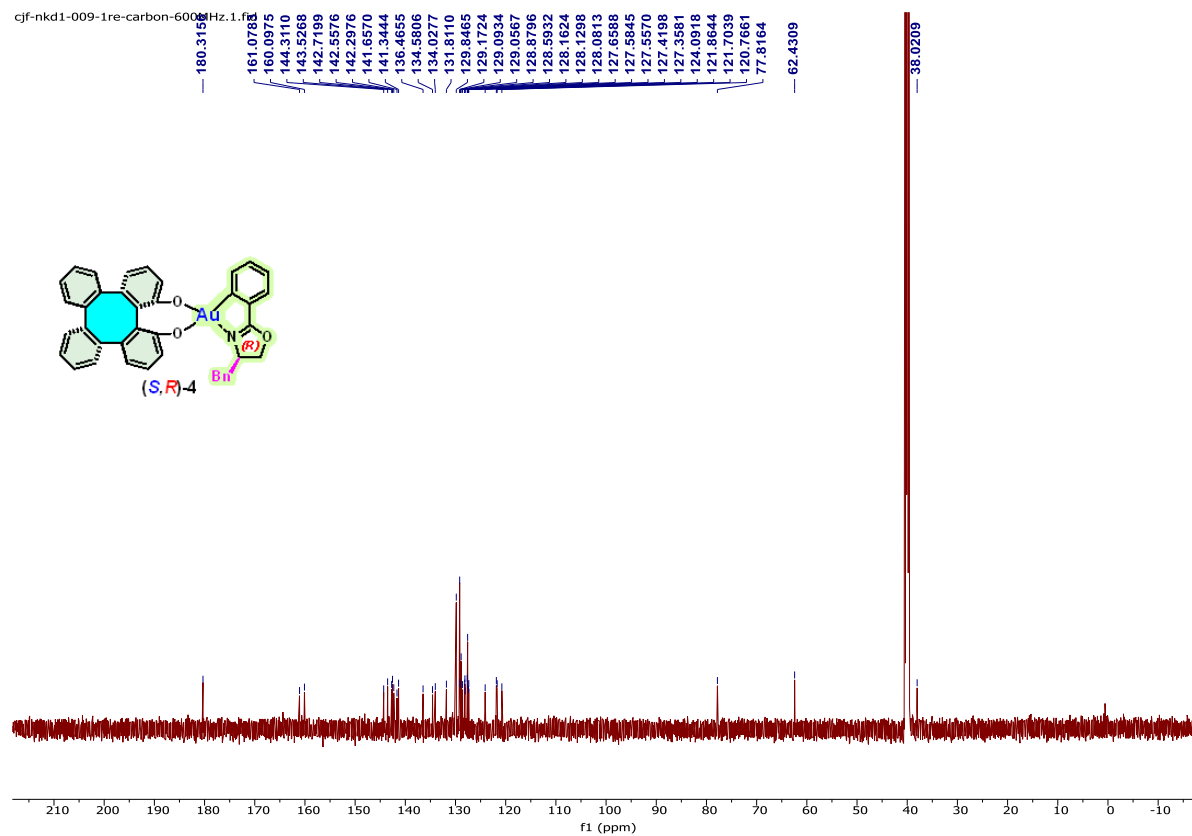

$^{13}\text{C}$  NMR (150 MHz,  $\text{DMSO-}d_6$ ) spectrum of  $(S,R)$ -4

# SUPPORTING INFORMATION

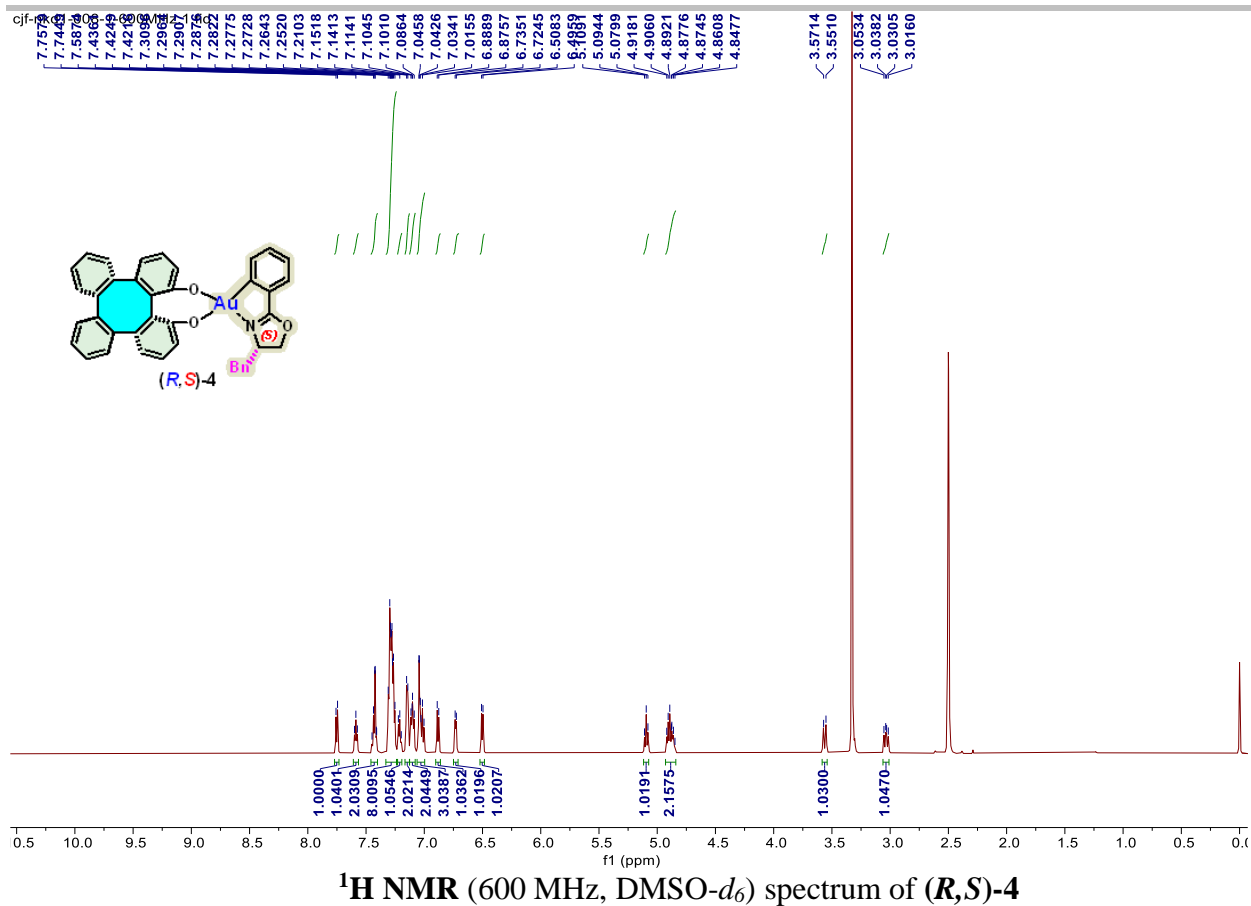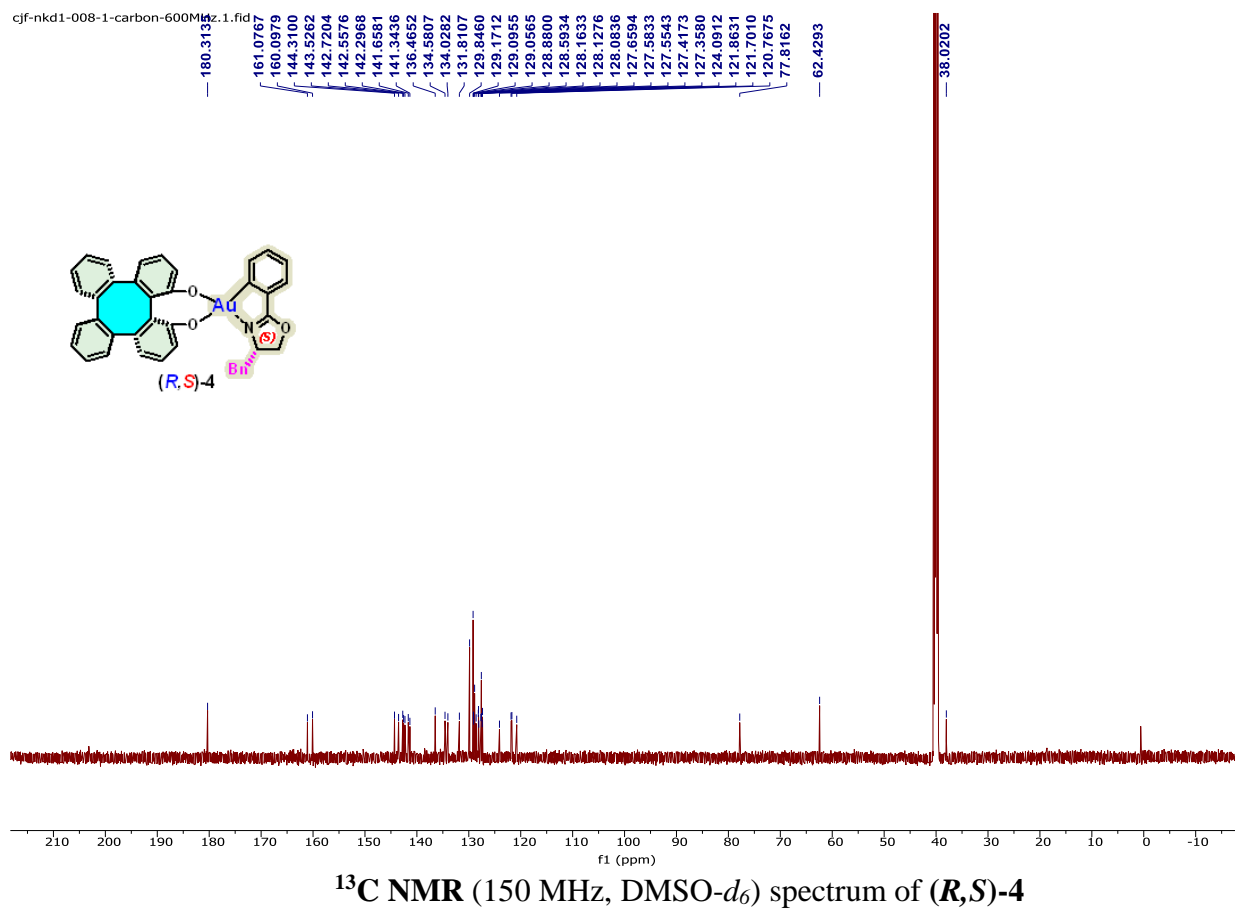

# SUPPORTING INFORMATION

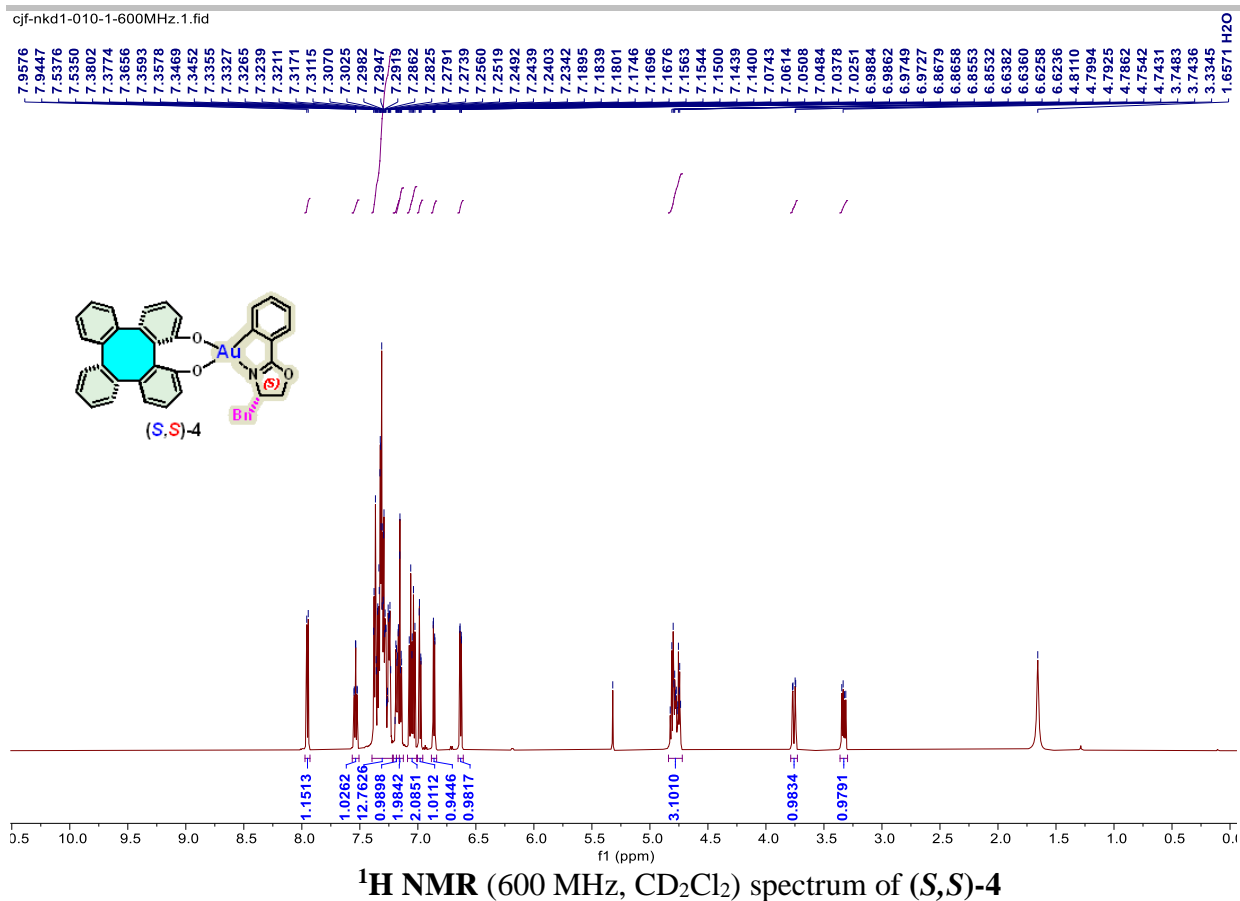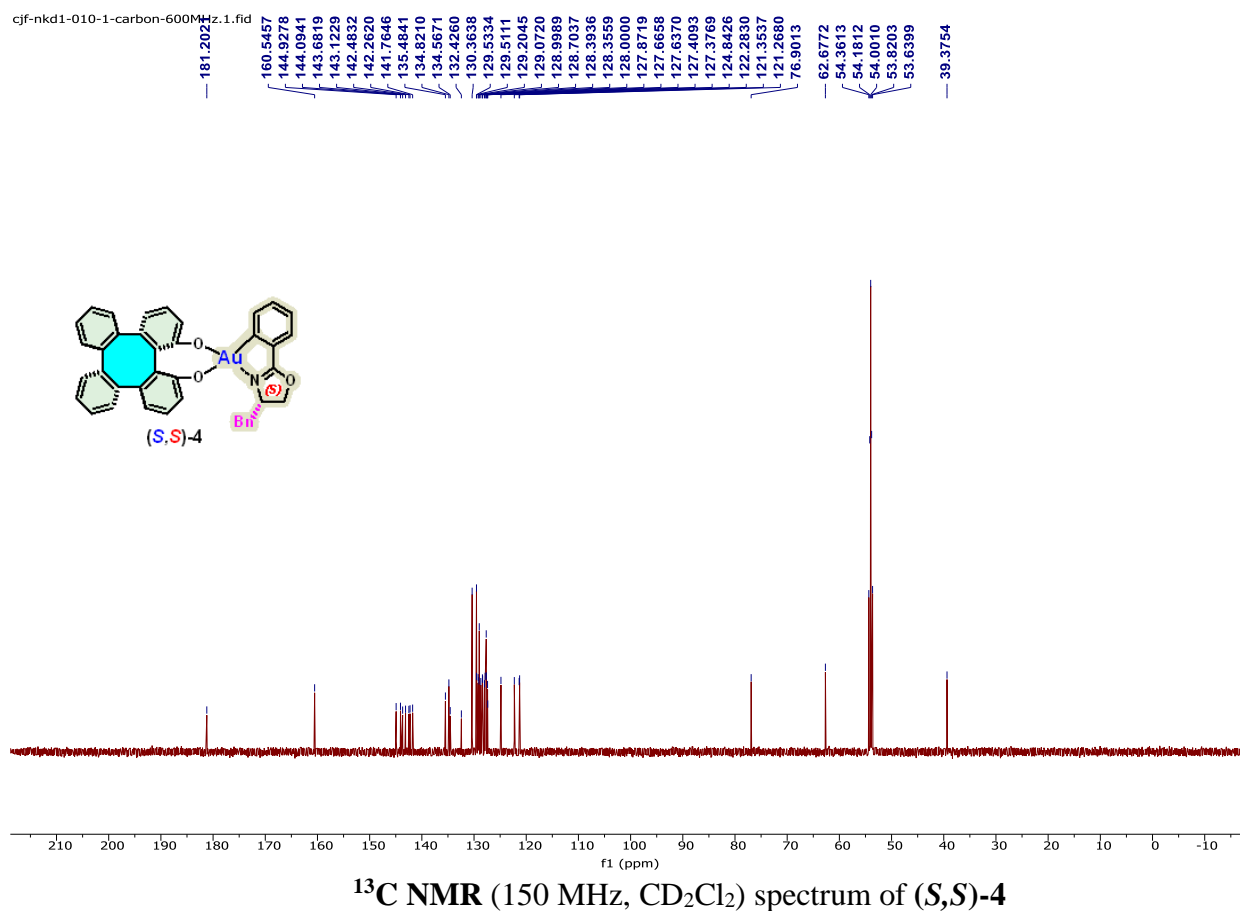

# SUPPORTING INFORMATION

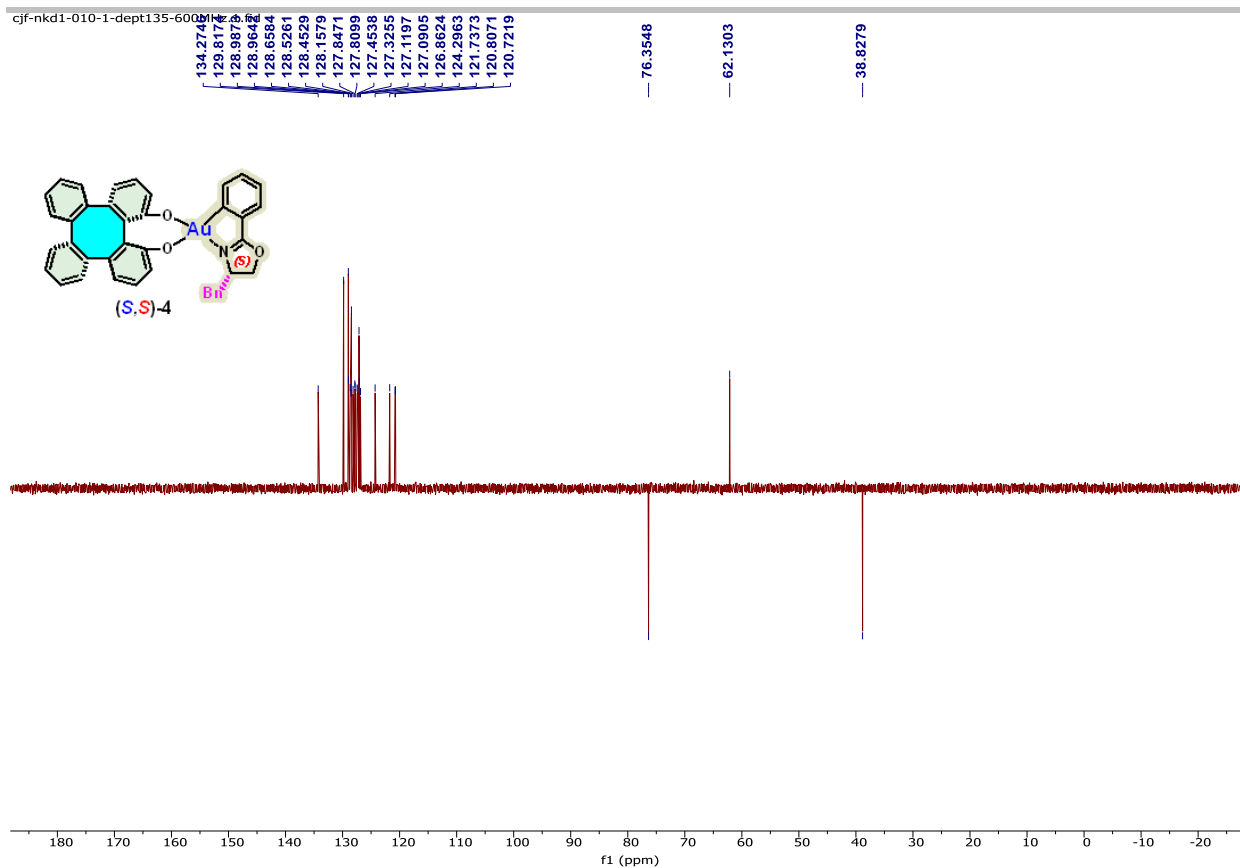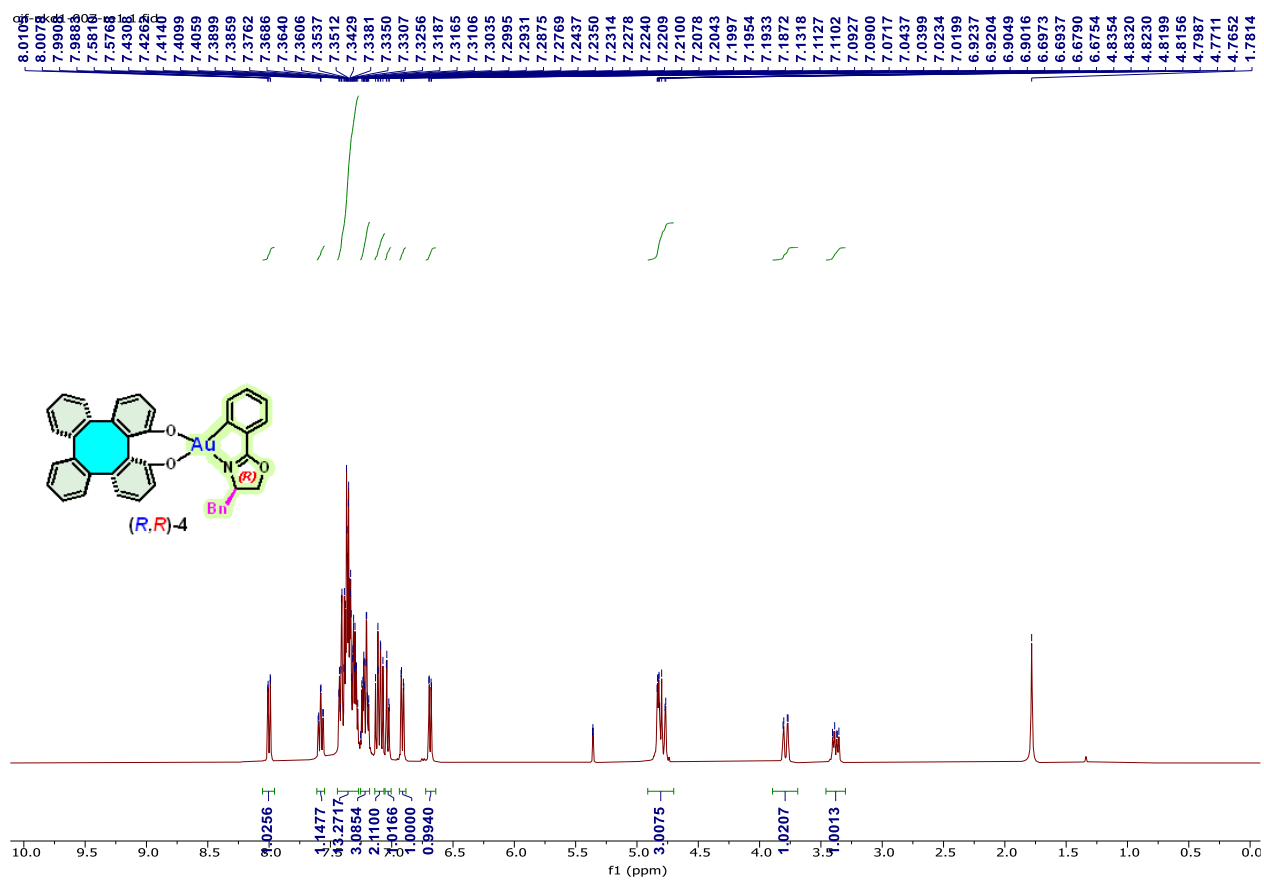

# SUPPORTING INFORMATION

cfj-nkd1-007-re1-carbon.3.fid

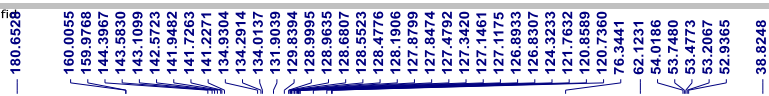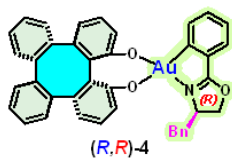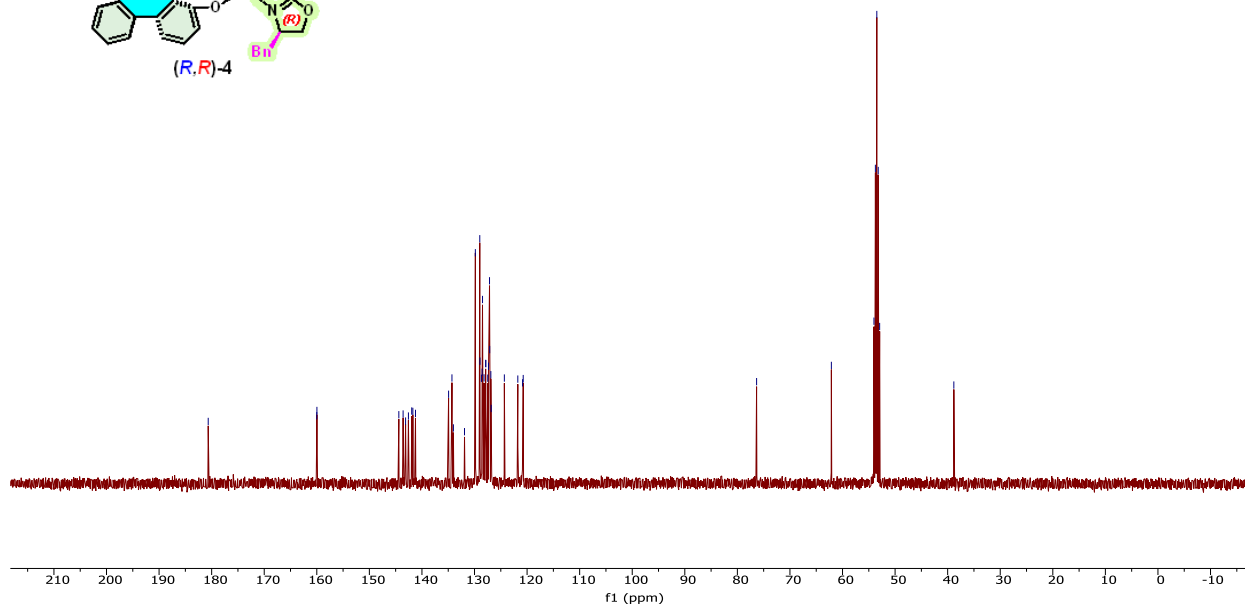

$^{13}\text{C}$  NMR (100 MHz,  $\text{CD}_2\text{Cl}_2$ ) spectrum of **(R,R)-4**

cfj-nkd1-007-re1-dept135.2.fid

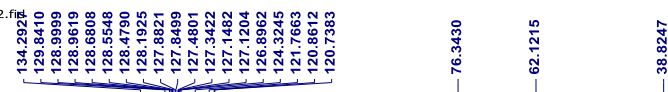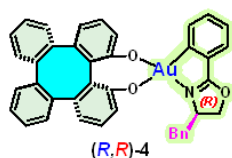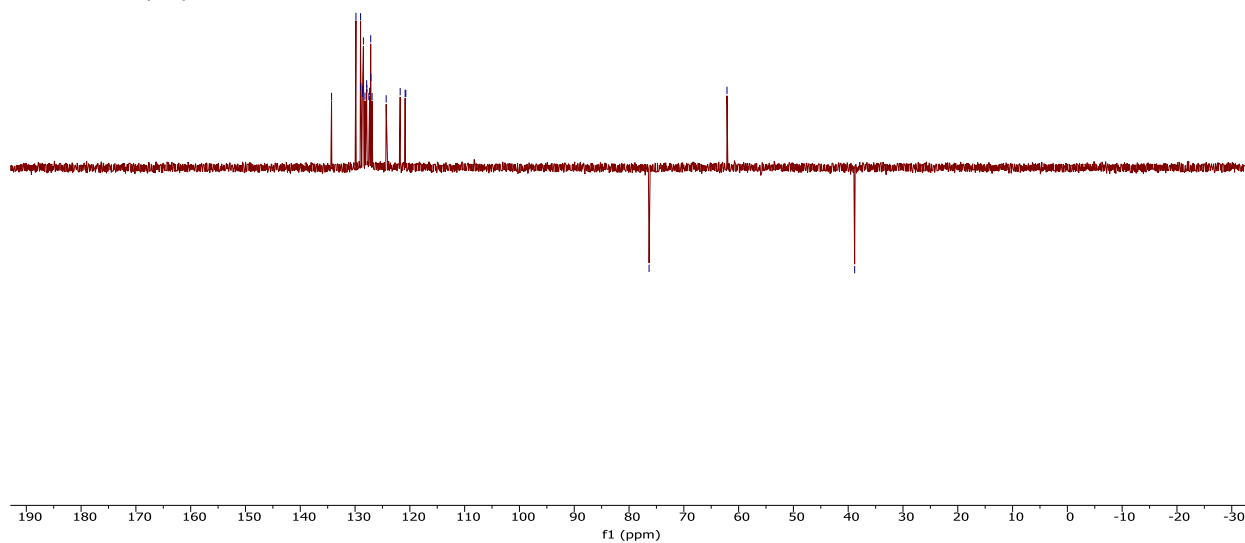

DEPT135  $^{13}\text{C}$  NMR (100 MHz,  $\text{CD}_2\text{Cl}_2$ ) spectrum of **(R,R)-4**

# SUPPORTING INFORMATION

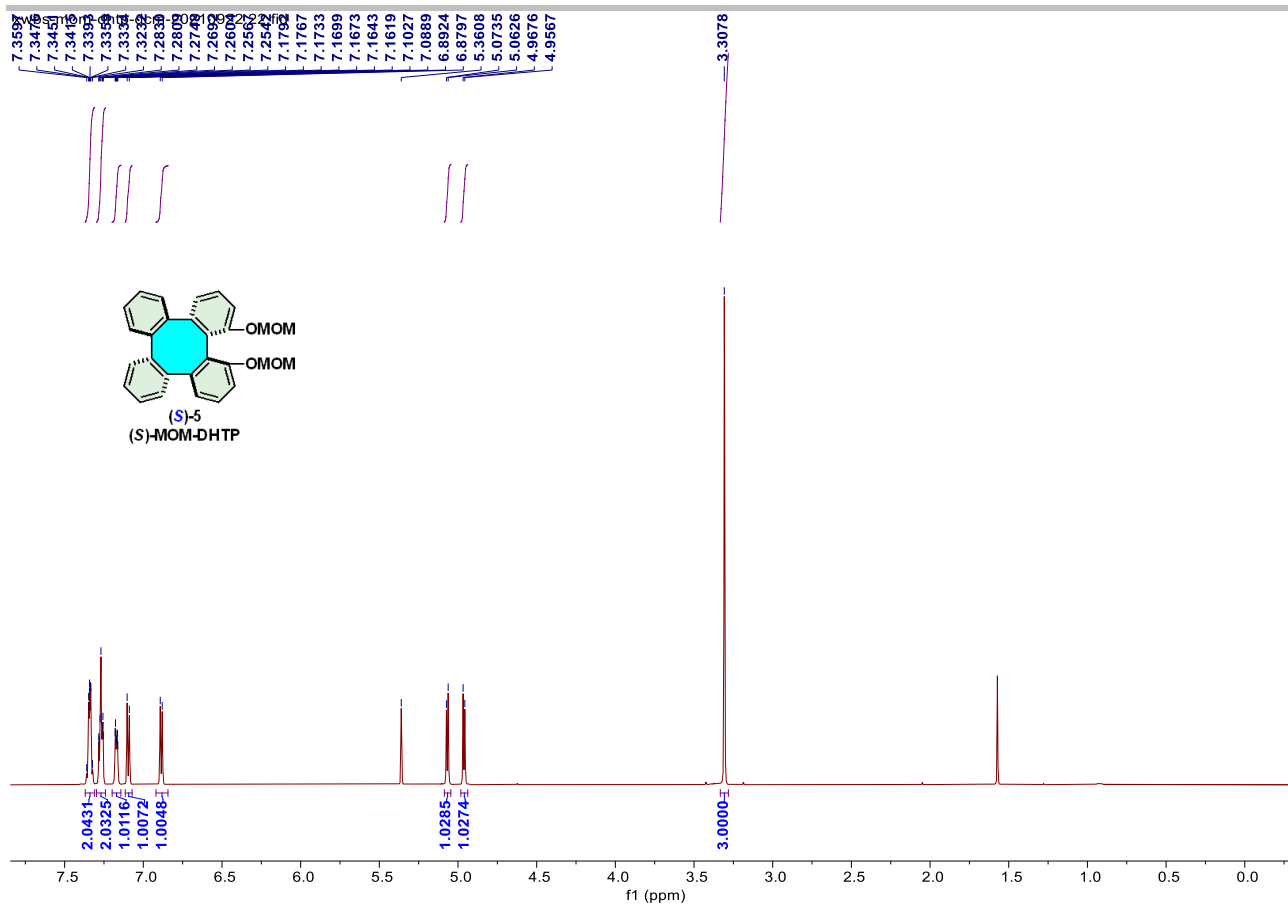

xwbs-mom-dhtp-dcm-20210922.23.fid

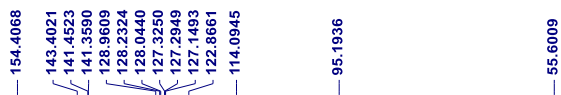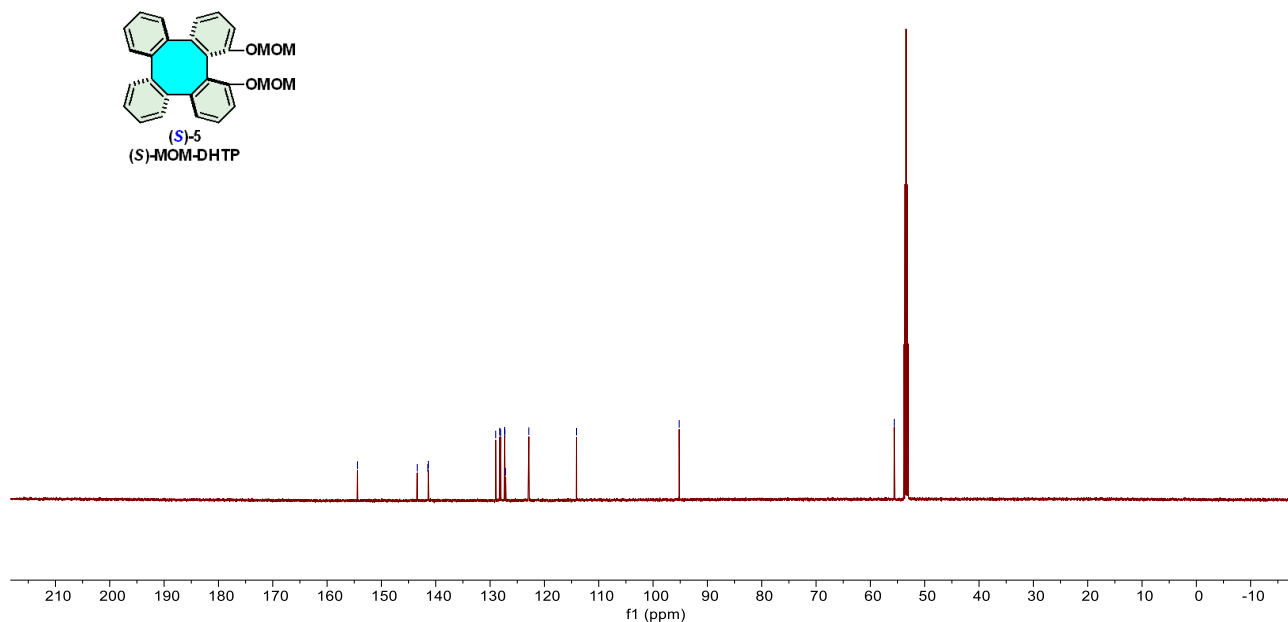

# SUPPORTING INFORMATION

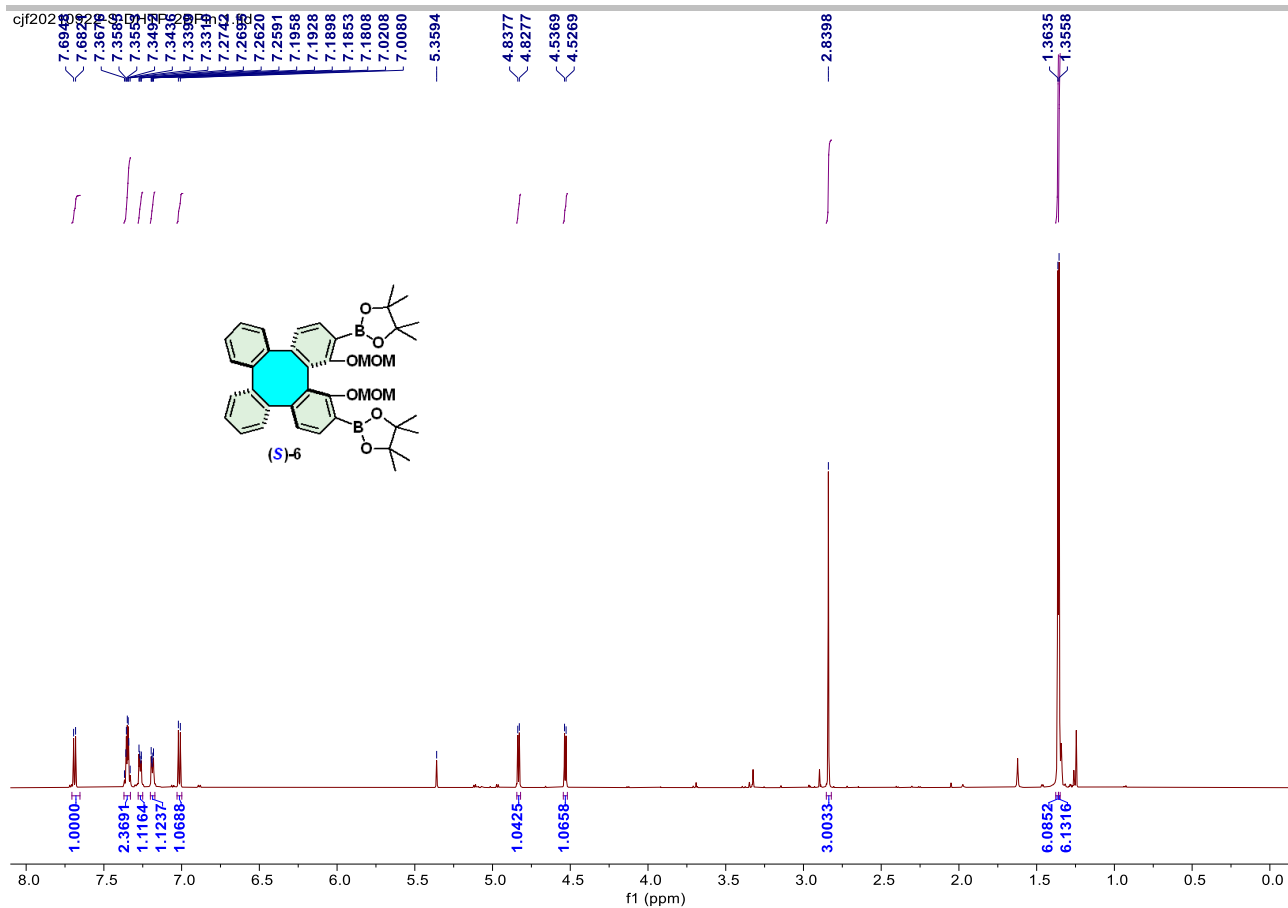

<sup>1</sup>H NMR (600 MHz, CD<sub>2</sub>Cl<sub>2</sub>) spectrum of (S)-6

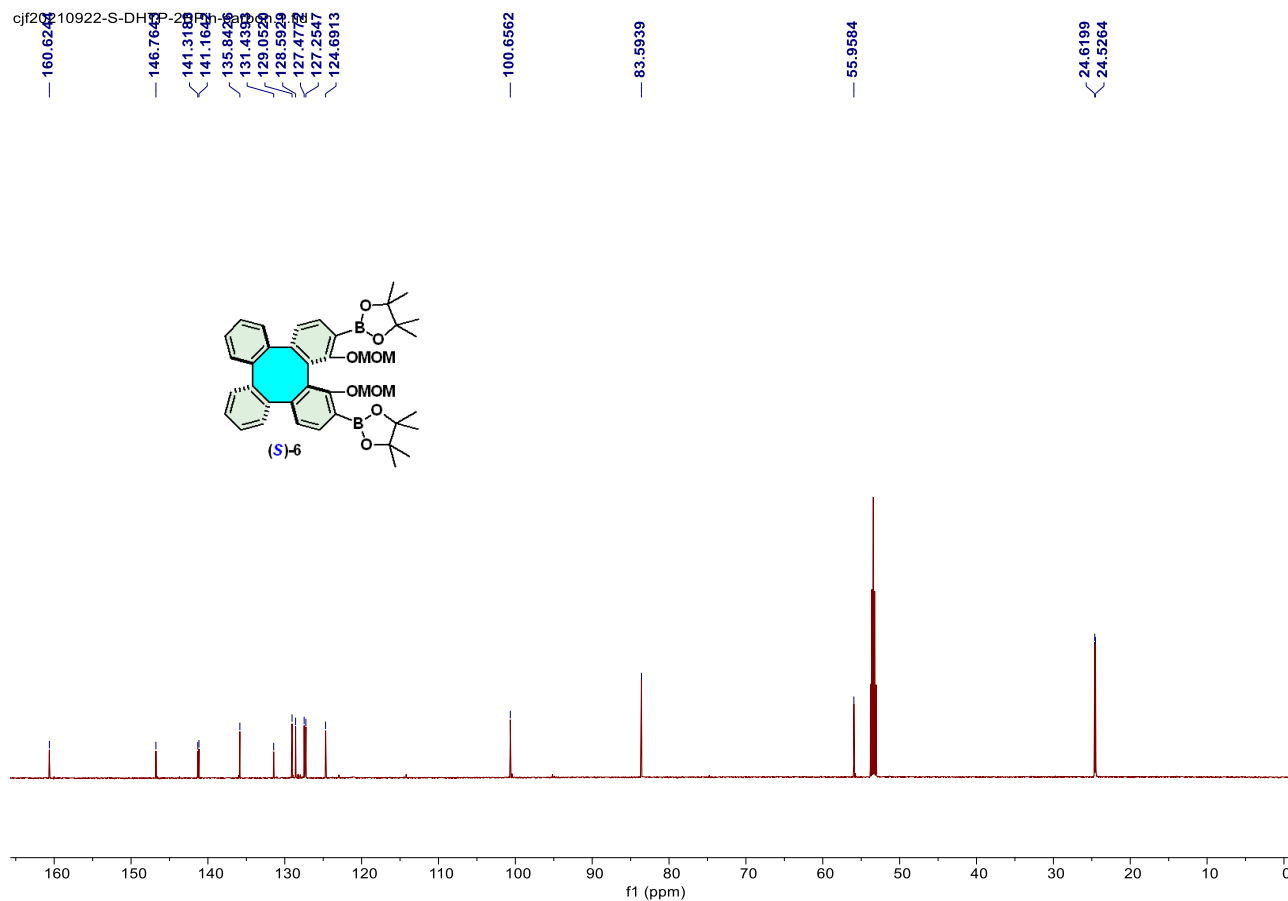

<sup>13</sup>C NMR (150 MHz, CD<sub>2</sub>Cl<sub>2</sub>) spectrum of (S)-6



# SUPPORTING INFORMATION

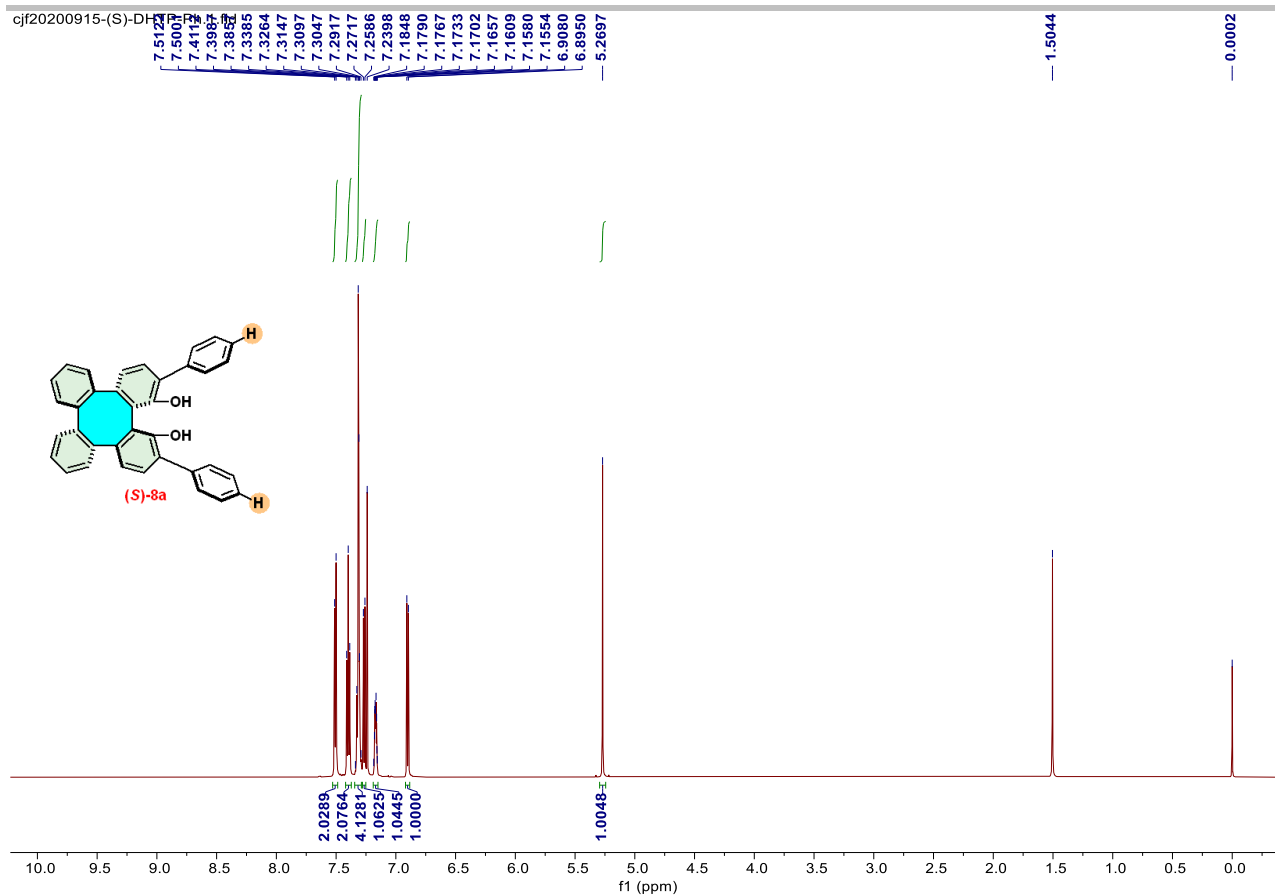

<sup>1</sup>H NMR (600 MHz, CDCl<sub>3</sub>) spectrum of (S)-8a

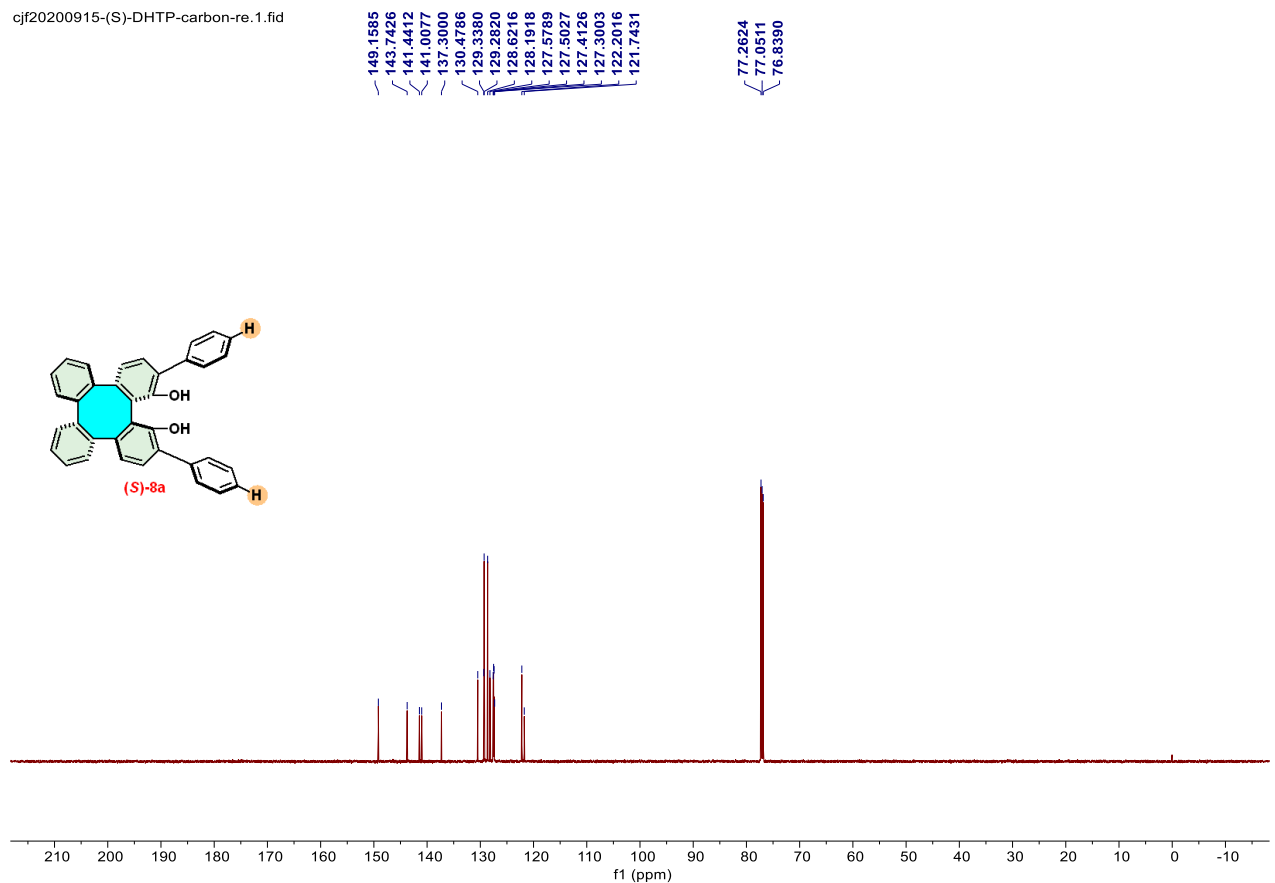

<sup>13</sup>C NMR (150 MHz, CDCl<sub>3</sub>) spectrum of (S)-8a

# SUPPORTING INFORMATION

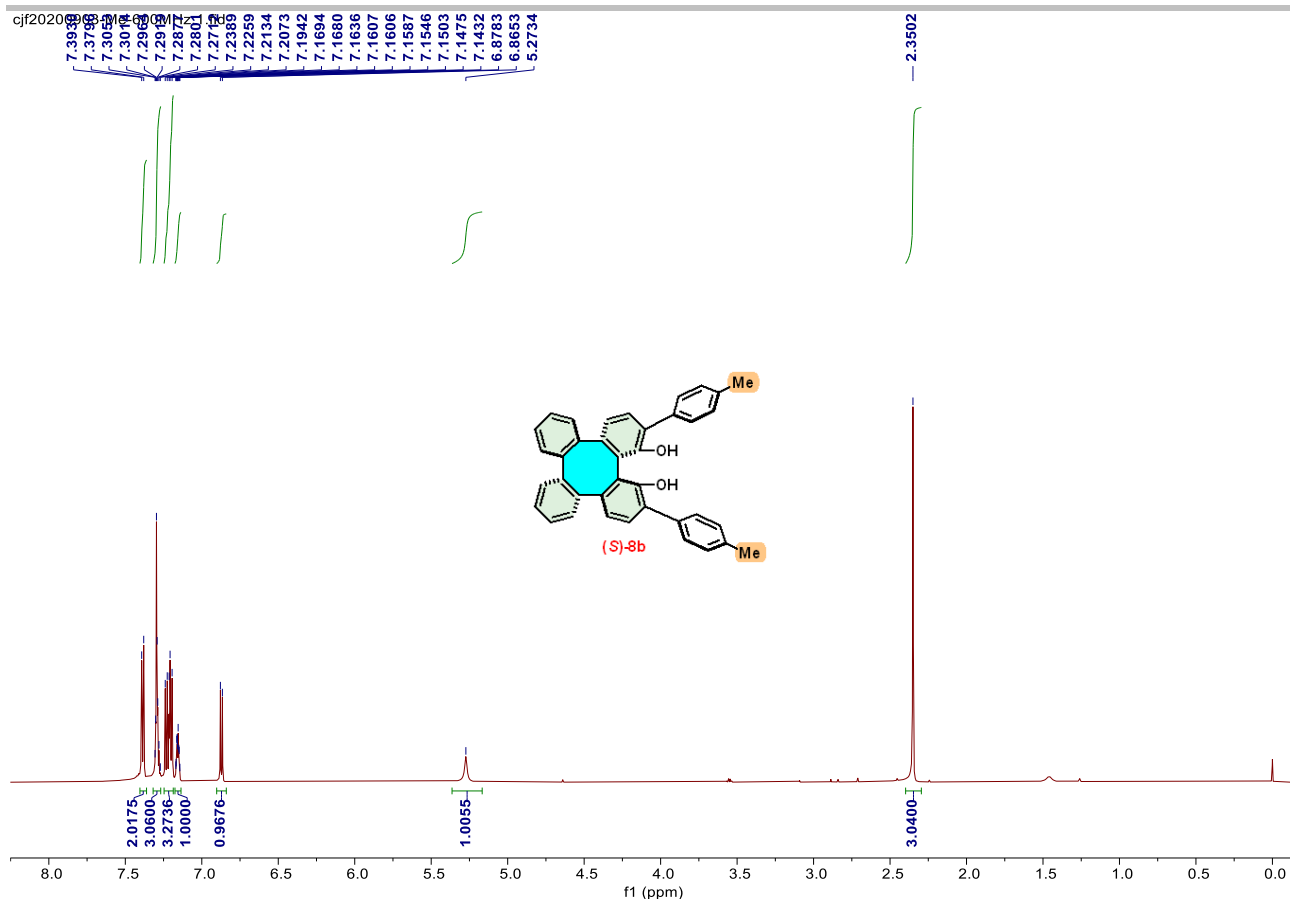

<sup>1</sup>H NMR (600 MHz, CDCl<sub>3</sub>) spectrum of (S)-8b

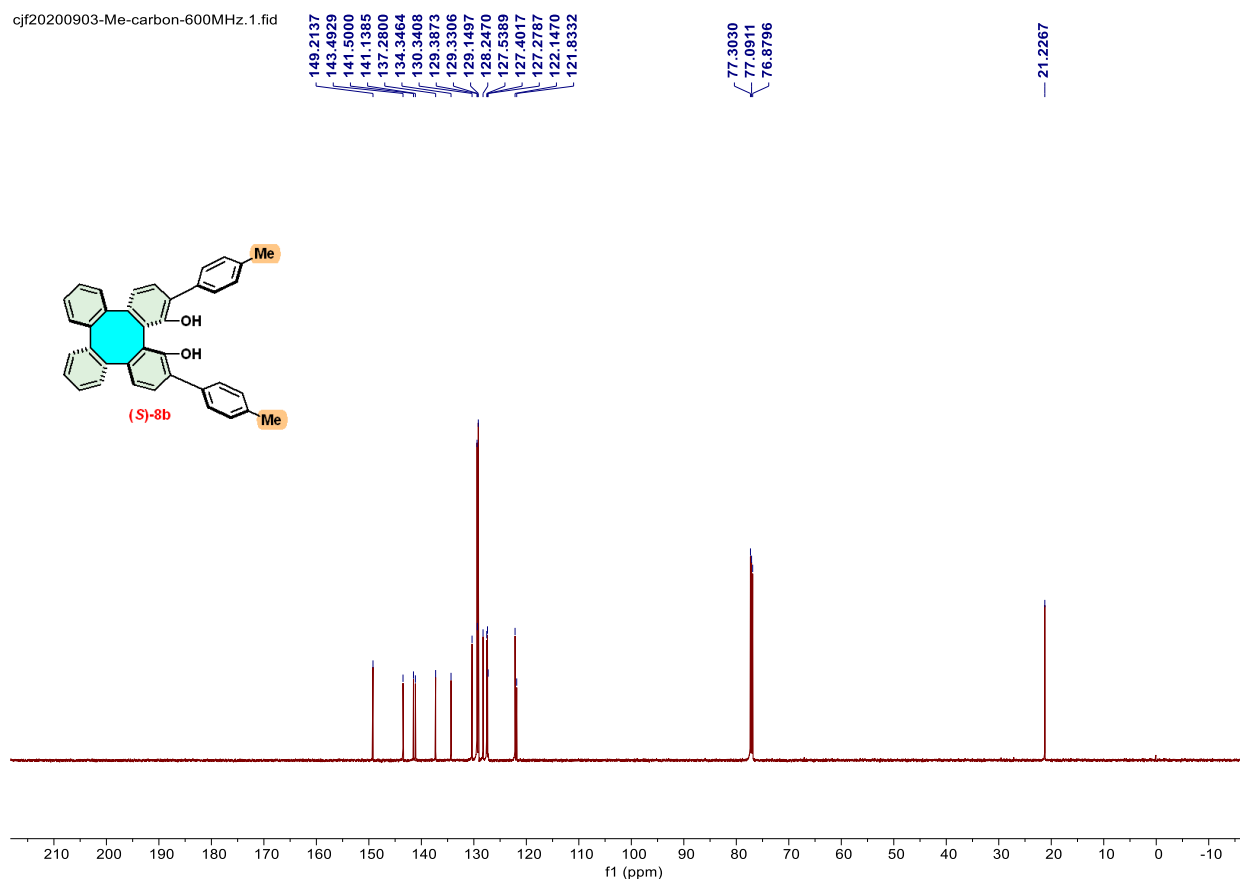

<sup>13</sup>C NMR (150 MHz, CDCl<sub>3</sub>) spectrum of (S)-8b

# SUPPORTING INFORMATION

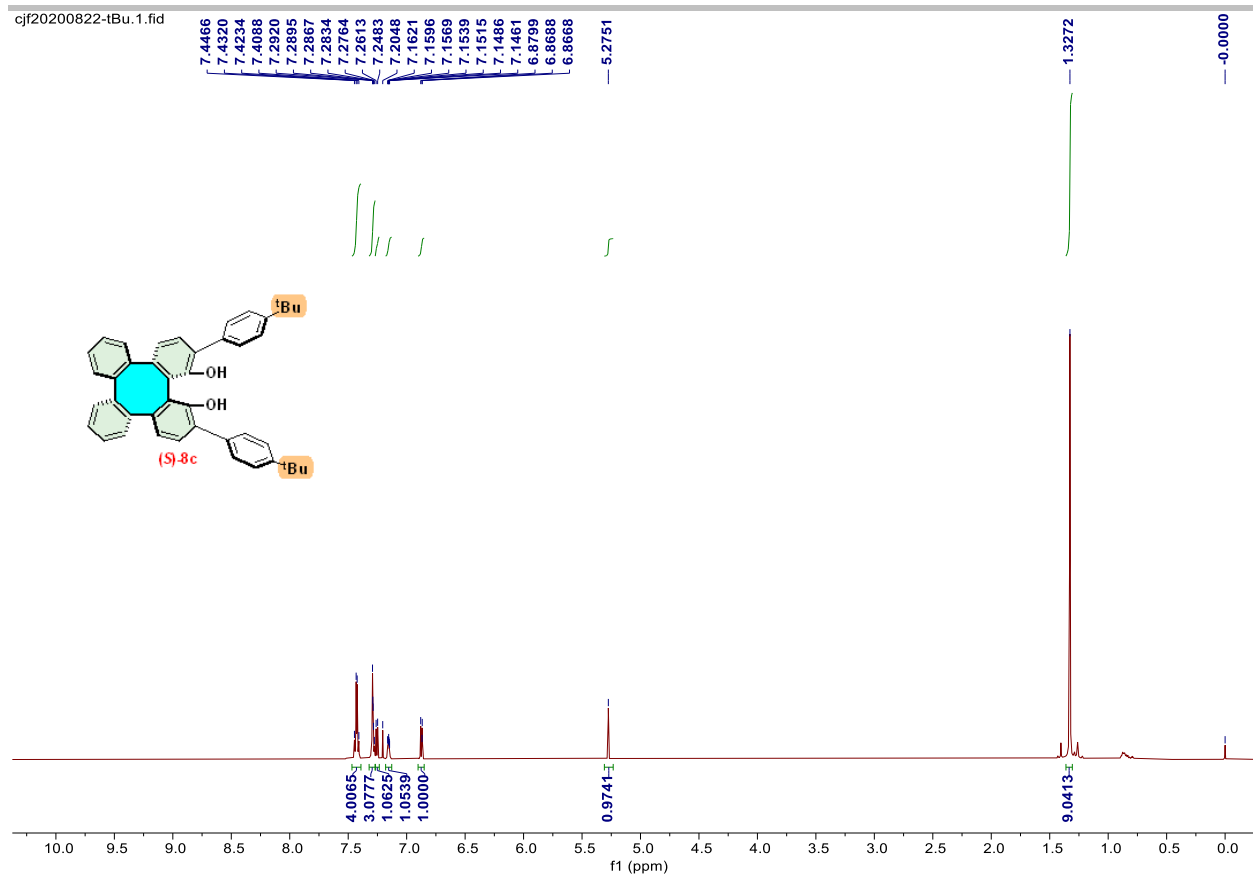

<sup>1</sup>H NMR (600 MHz, CDCl<sub>3</sub>) spectrum of **(S)-8c**

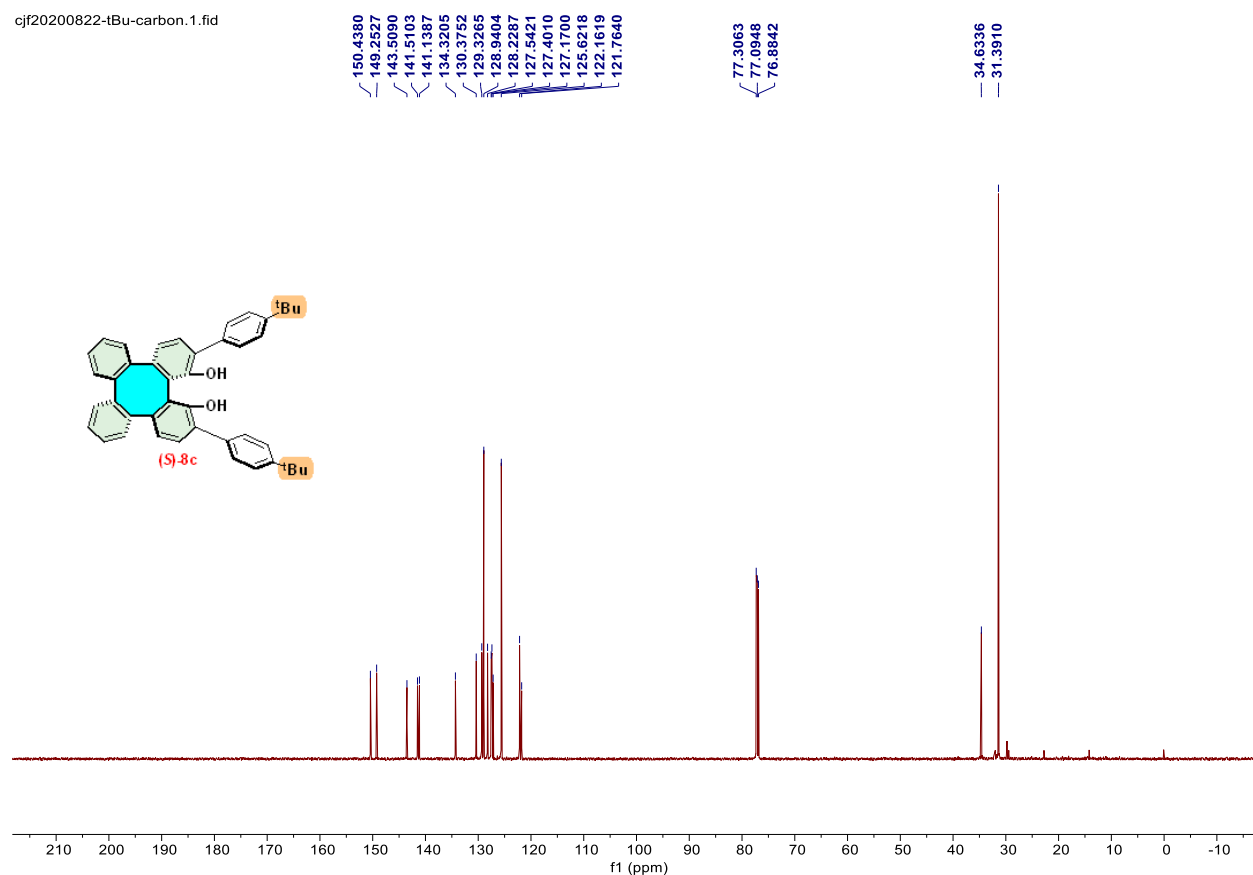

<sup>13</sup>C NMR (150 MHz, CDCl<sub>3</sub>) spectrum of **(S)-8c**

# SUPPORTING INFORMATION

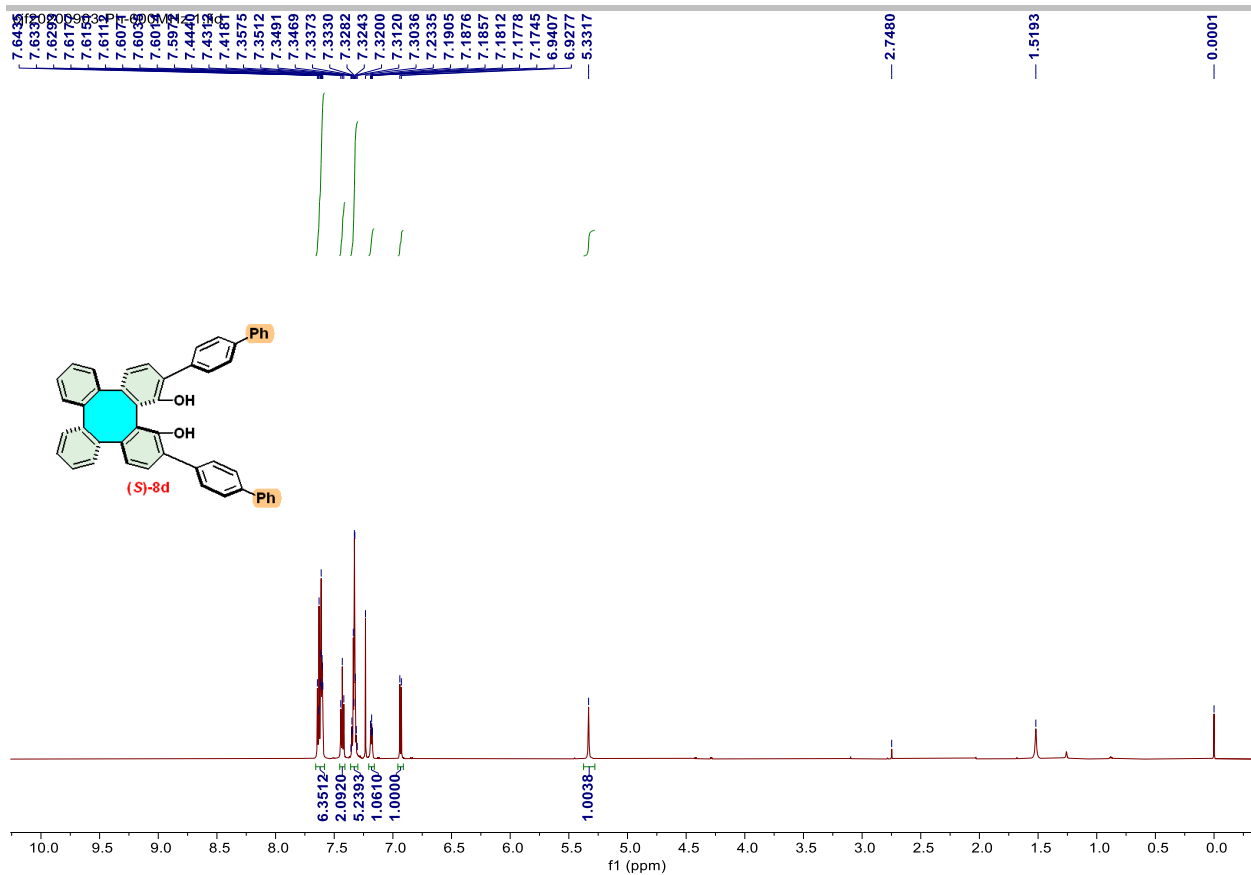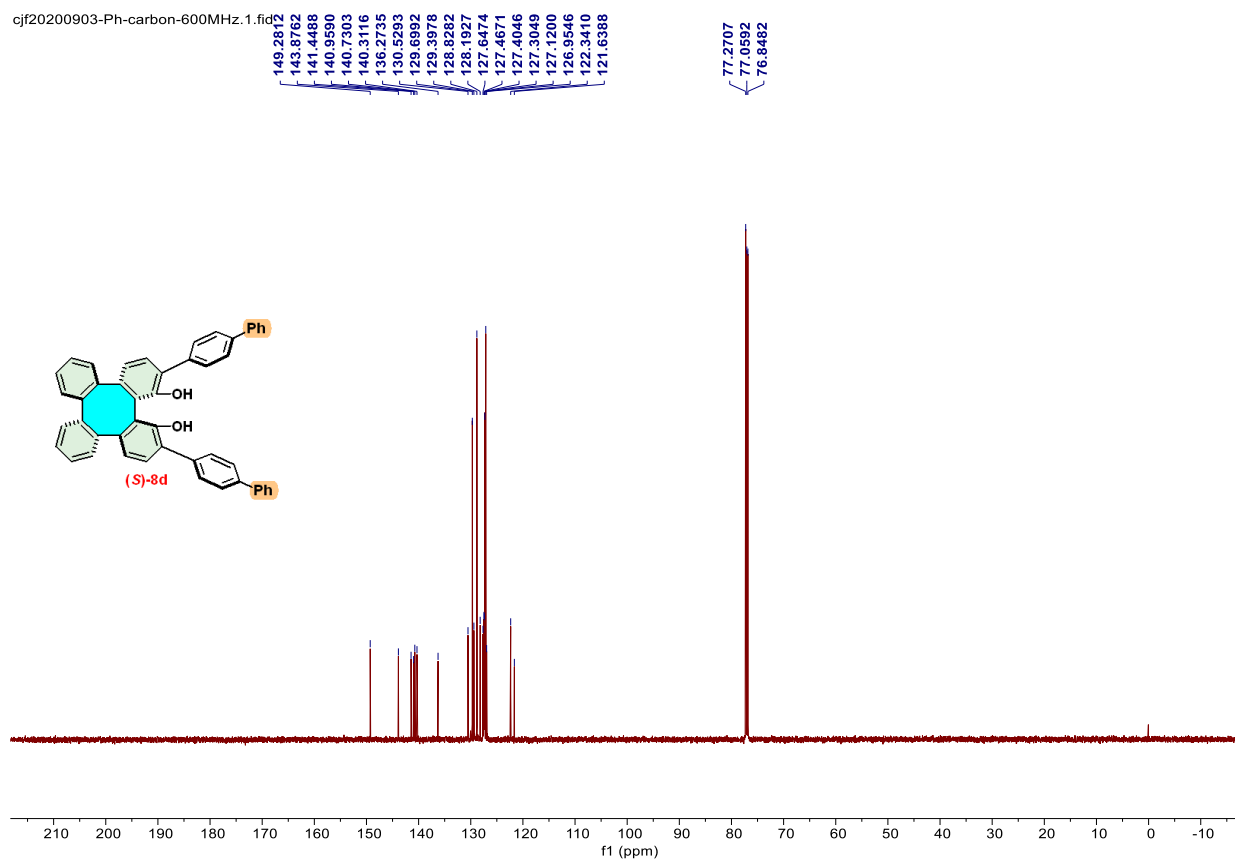

# SUPPORTING INFORMATION

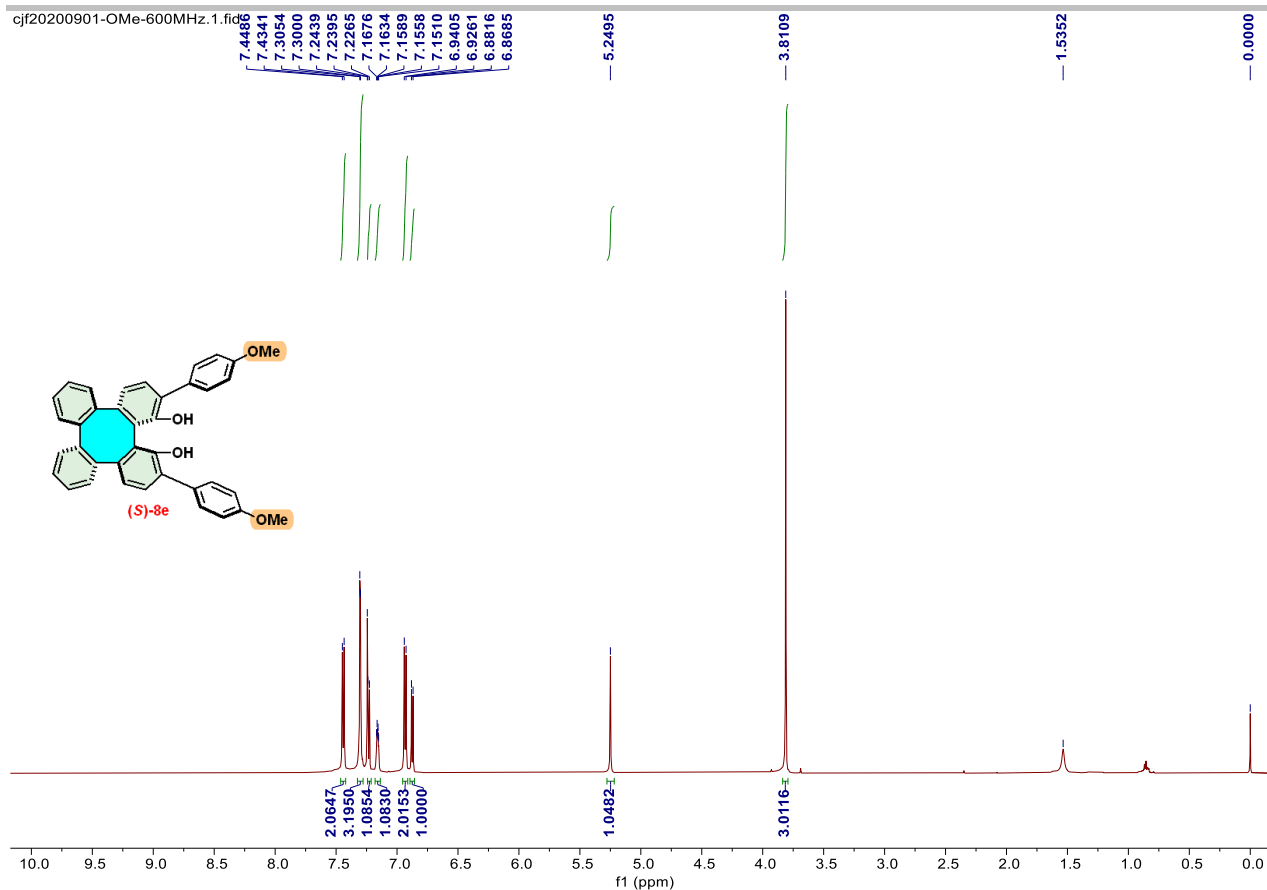

**<sup>1</sup>H NMR (600 MHz, CDCl<sub>3</sub>) spectrum of (S)-8e**

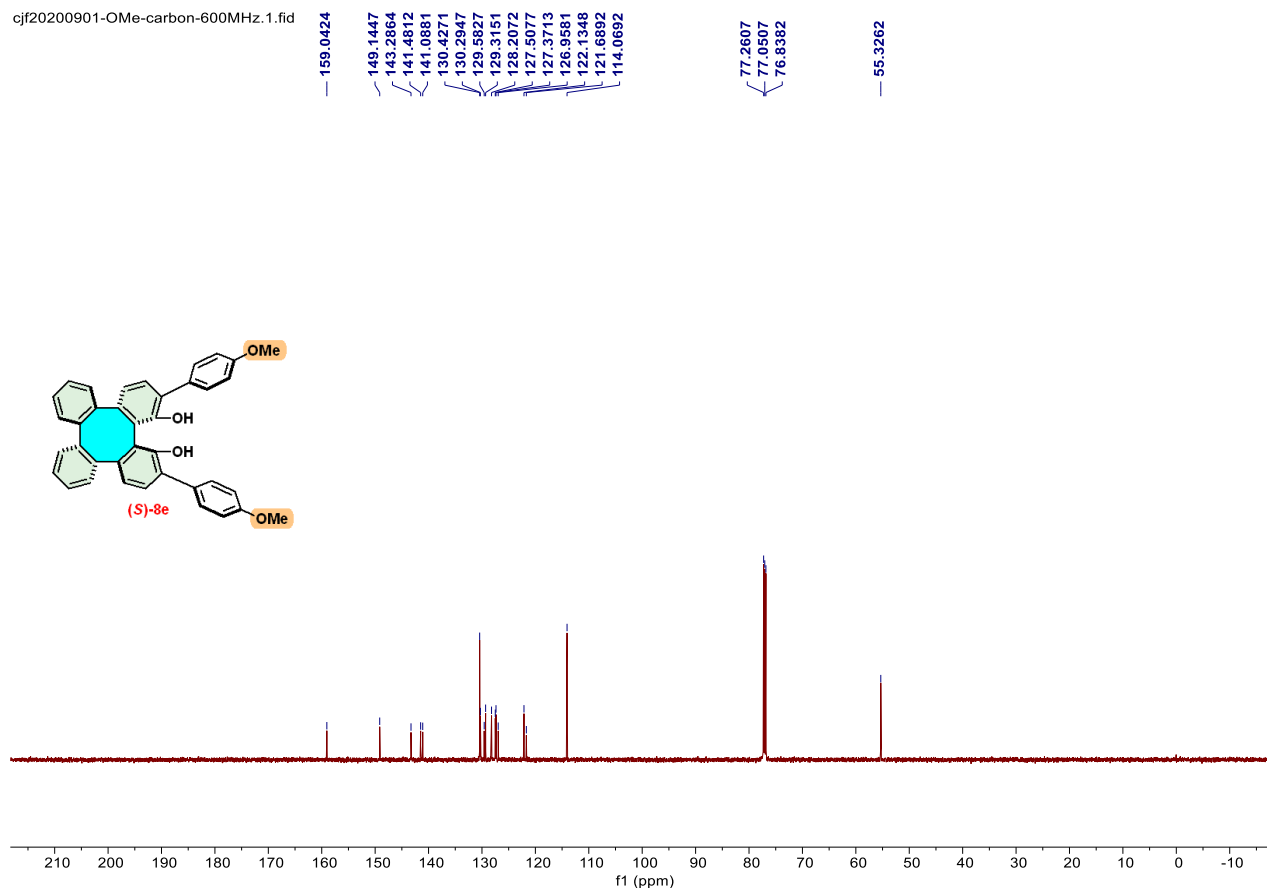

**<sup>13</sup>C NMR (150 MHz, CDCl<sub>3</sub>) spectrum of (S)-8e**

# SUPPORTING INFORMATION

cfj20200901-Cl-400MHz.1.fid

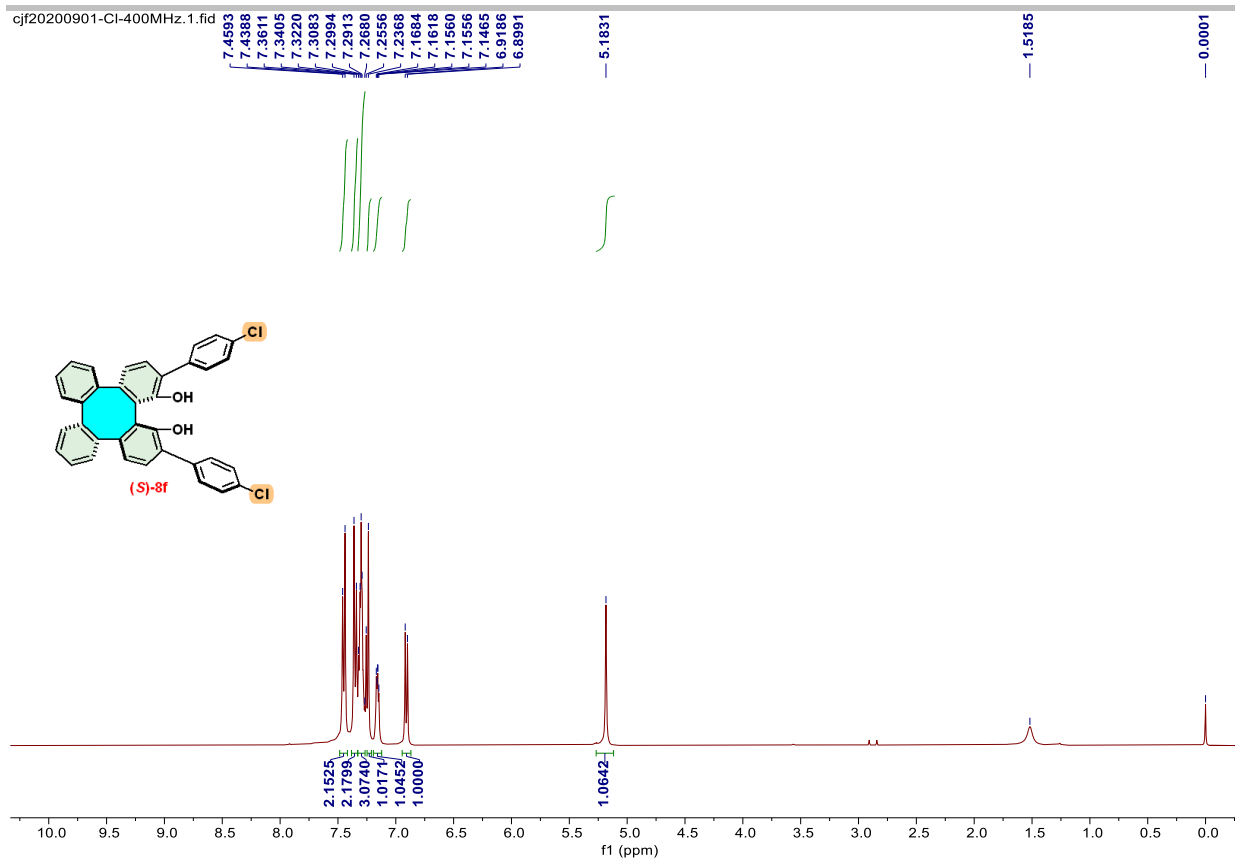

cfj20200901-Cl-carbon-400MHz.1.fid

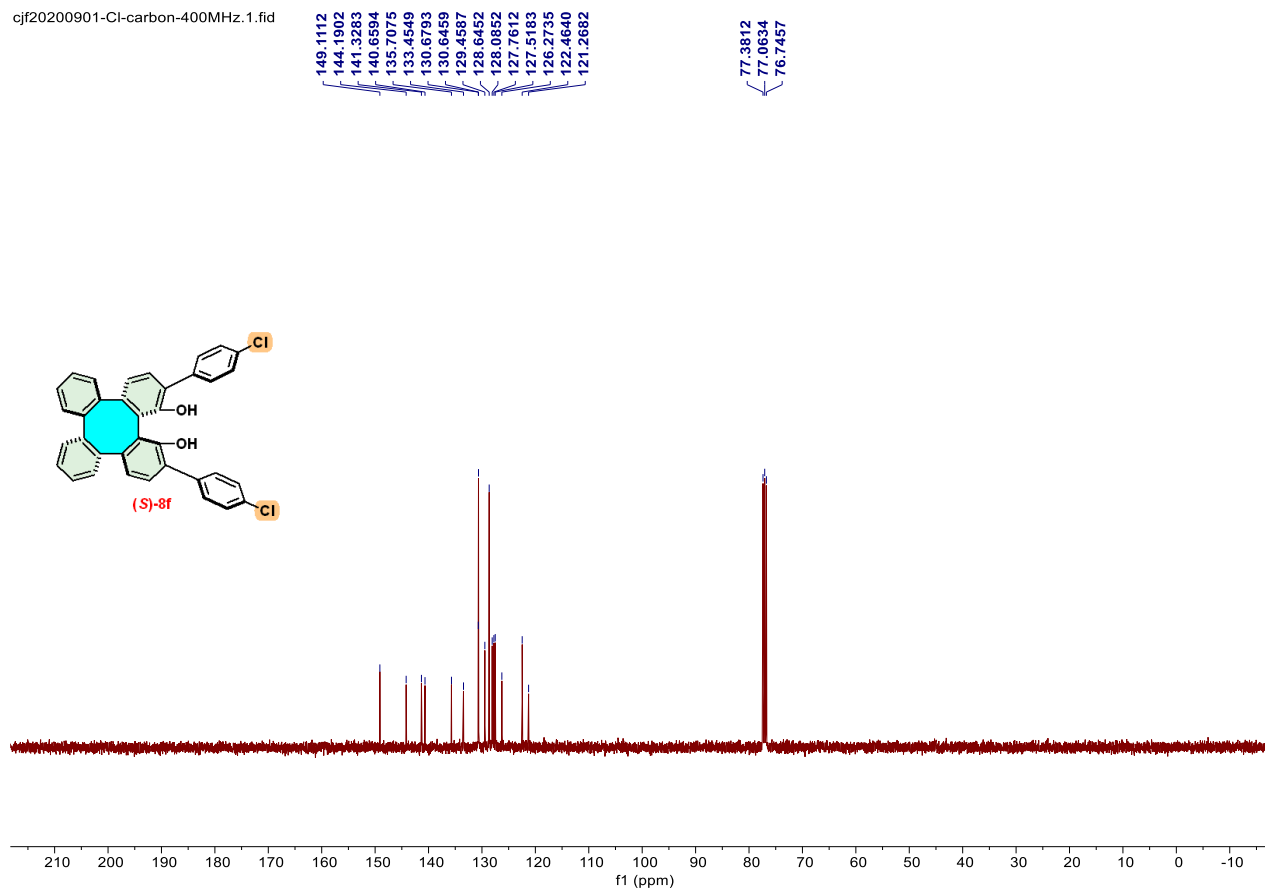

# SUPPORTING INFORMATION

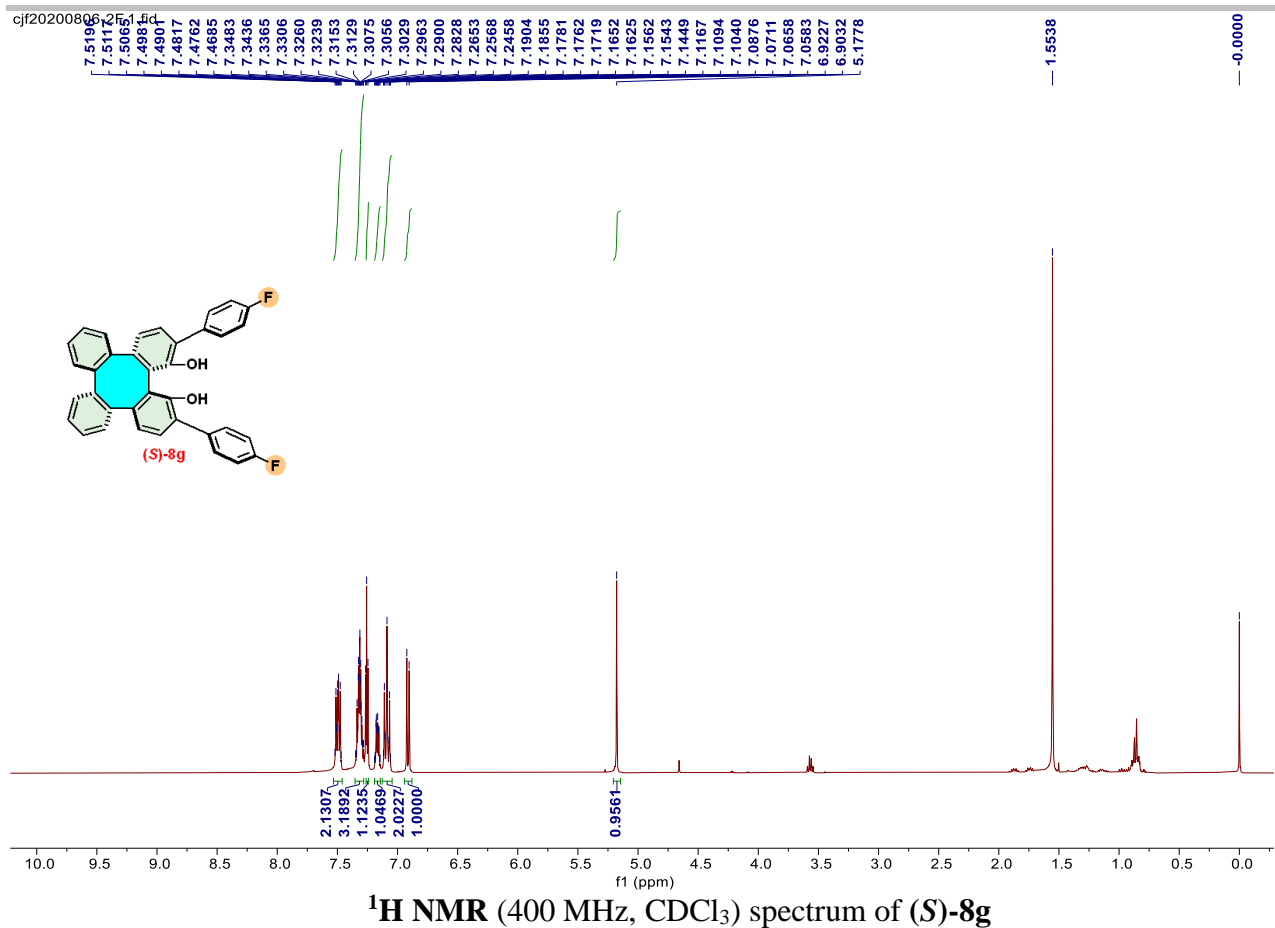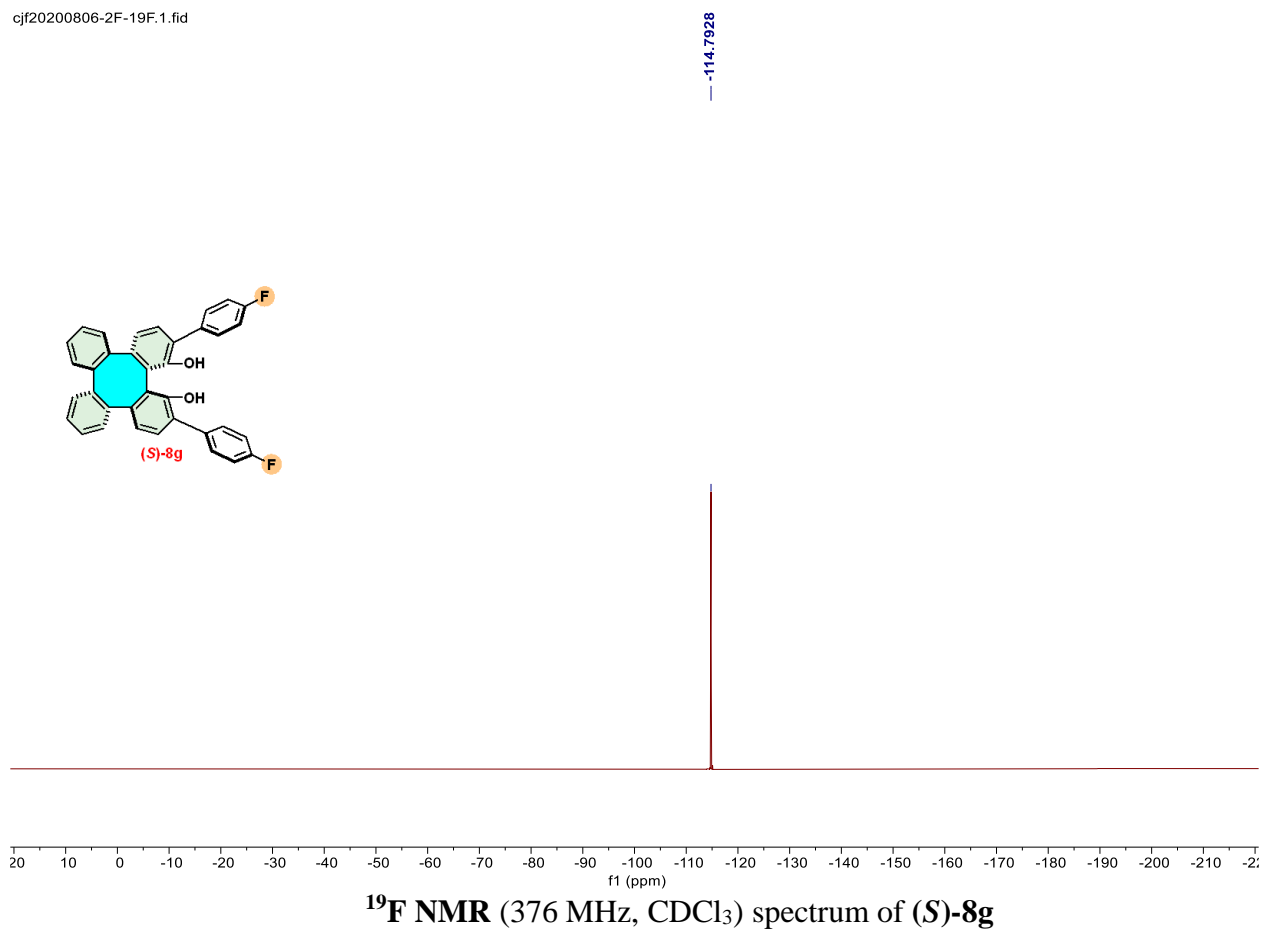

# SUPPORTING INFORMATION

cfj20200904-F-carbon-400MHz.1.fid

163.4771  
161.0242  
149.0864  
143.9164  
141.3675  
140.7525  
133.2135  
133.1808  
131.0293  
130.9494  
130.6680  
129.4186  
128.1038  
127.6675  
127.4667  
126.4318  
122.3475  
121.3409  
115.5176  
115.3063  
77.3565  
77.0391  
76.7215

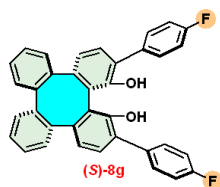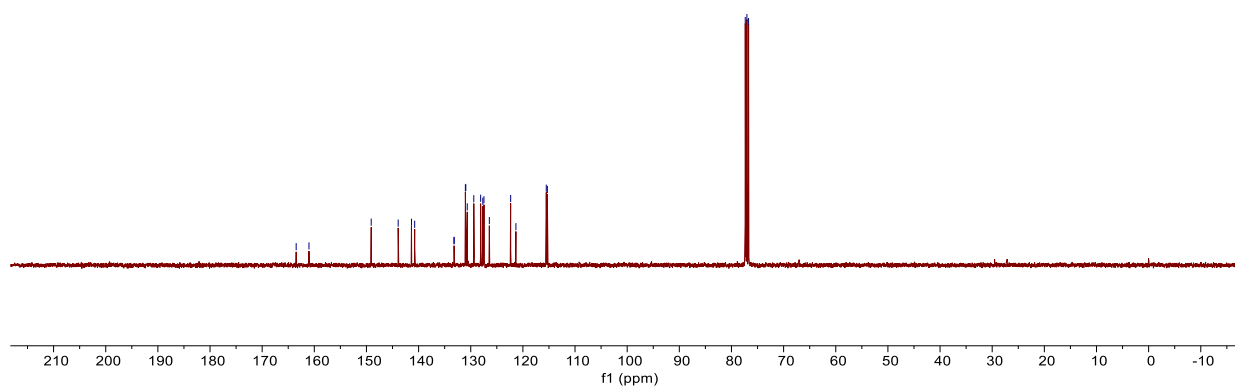

$^{13}\text{C}$  NMR (100 MHz,  $\text{CDCl}_3$ ) spectrum of **(S)-8g**

cfj20200829-CF3.1.fid

7.6496  
7.3509  
7.3436  
7.3368  
7.3347  
7.3286  
7.3190  
7.3104  
7.3054  
7.2997  
7.2952  
7.2461  
7.1901  
7.1845  
7.1804  
7.1760  
7.1696  
7.1627  
6.9700  
6.9570  
5.1811  
1.5133  
1.2581  
0.0001

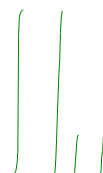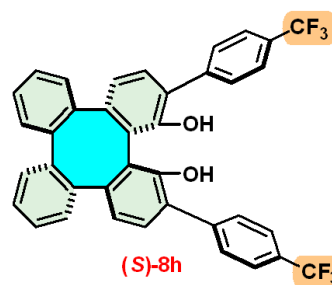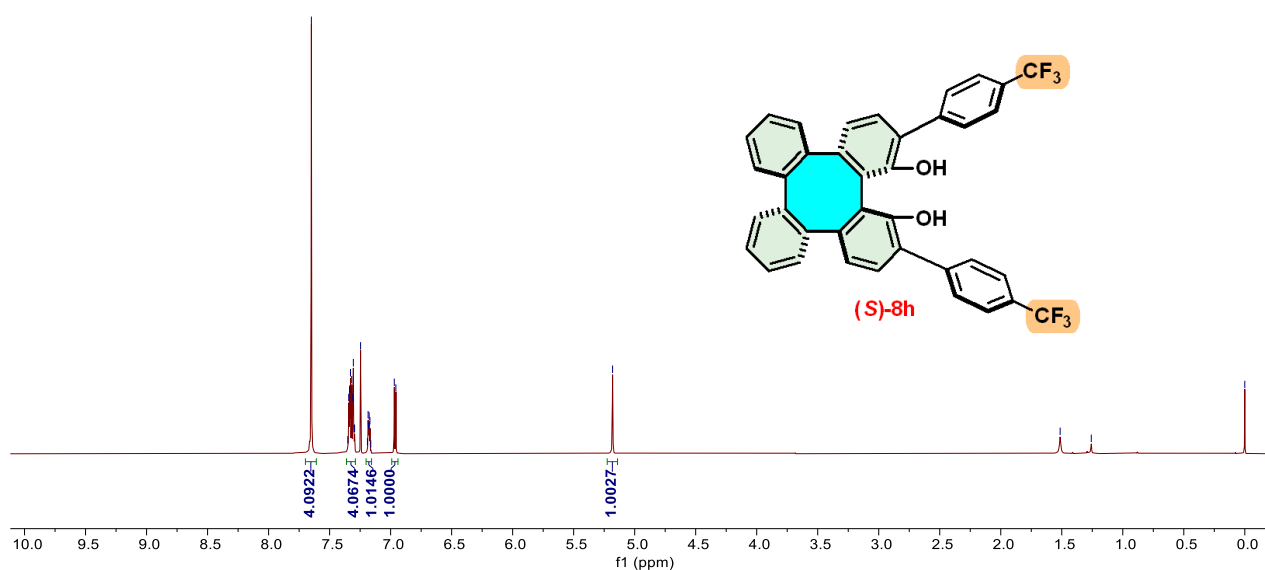

$^1\text{H}$  NMR (600 MHz,  $\text{CDCl}_3$ ) spectrum of **(S)-8h**



# SUPPORTING INFORMATION

cfj20200829-CF3-carbon.1.fid

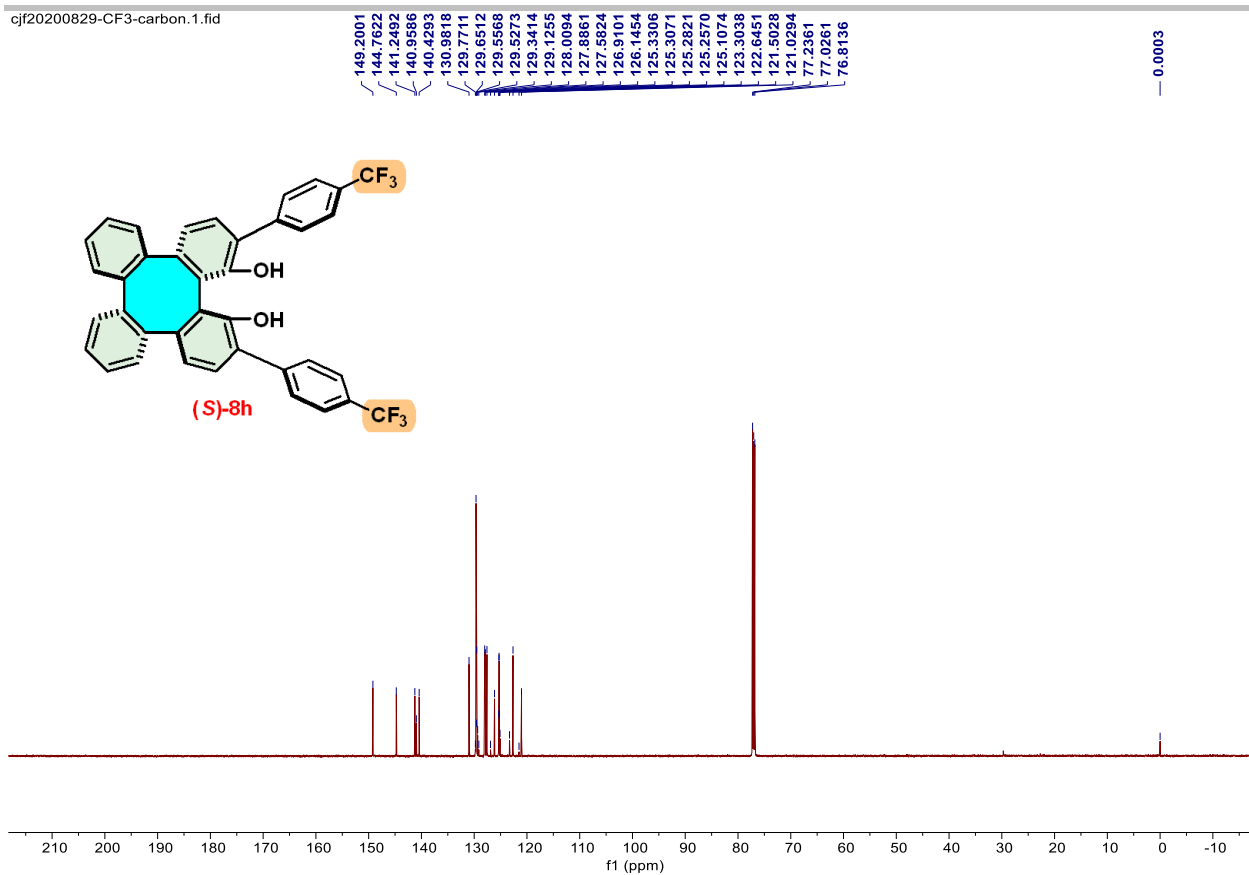

<sup>13</sup>C NMR (150 MHz, CDCl<sub>3</sub>) spectrum of (S)-8h

cfj20200829-CF3-F19.1.fid

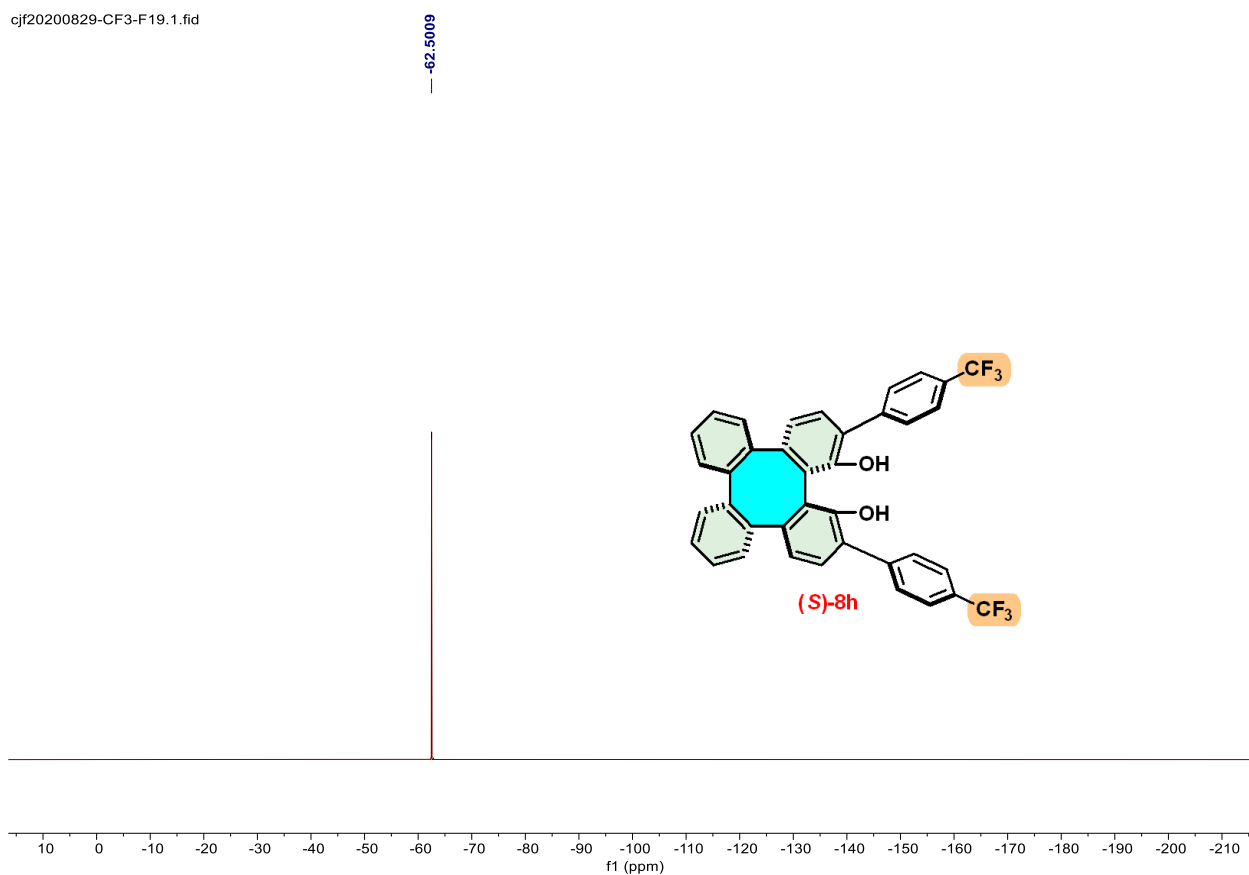

<sup>19</sup>F NMR (565 MHz, CDCl<sub>3</sub>) spectrum of (S)-8h

# SUPPORTING INFORMATION

cfj20200831-NO2.1.fid

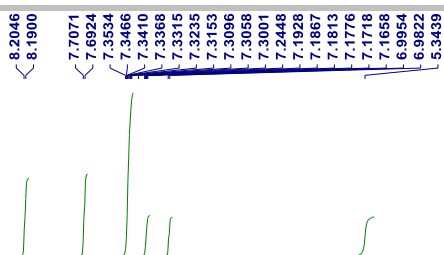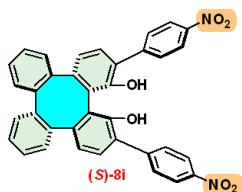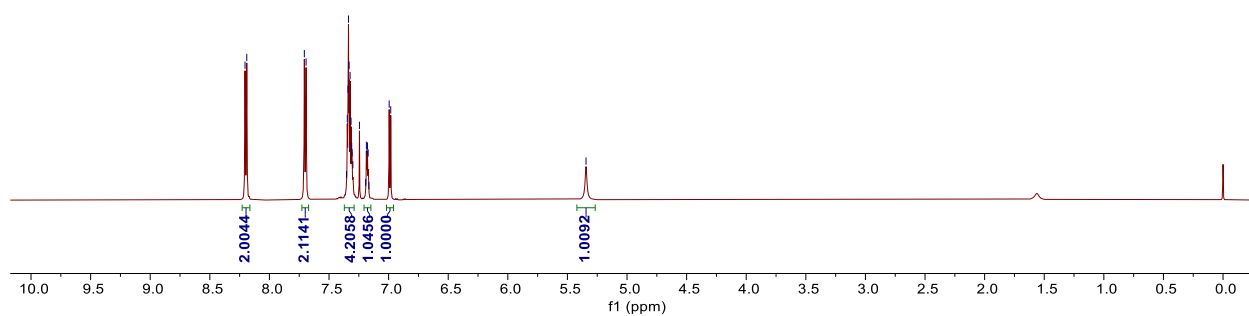

**<sup>1</sup>H NMR (600 MHz, CDCl<sub>3</sub>) spectrum of (S)-8i**

cfj20200831-NO2-carbon.1.fid

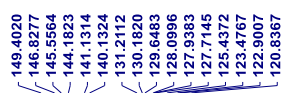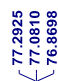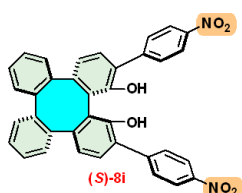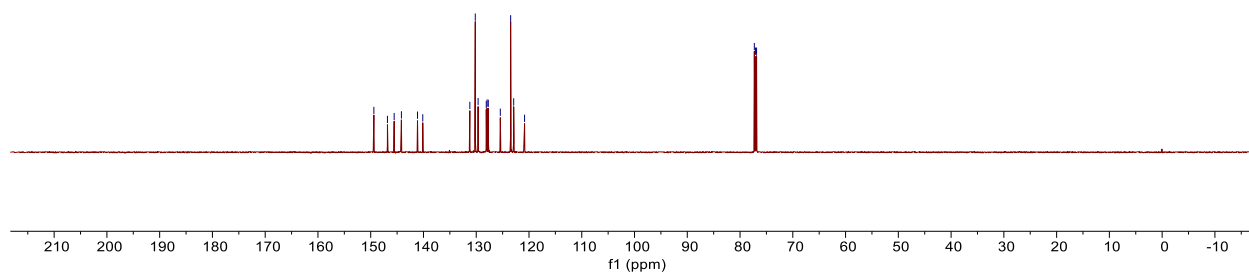

**<sup>13</sup>C NMR (150 MHz, CDCl<sub>3</sub>) spectrum of (S)-8i**

# SUPPORTING INFORMATION

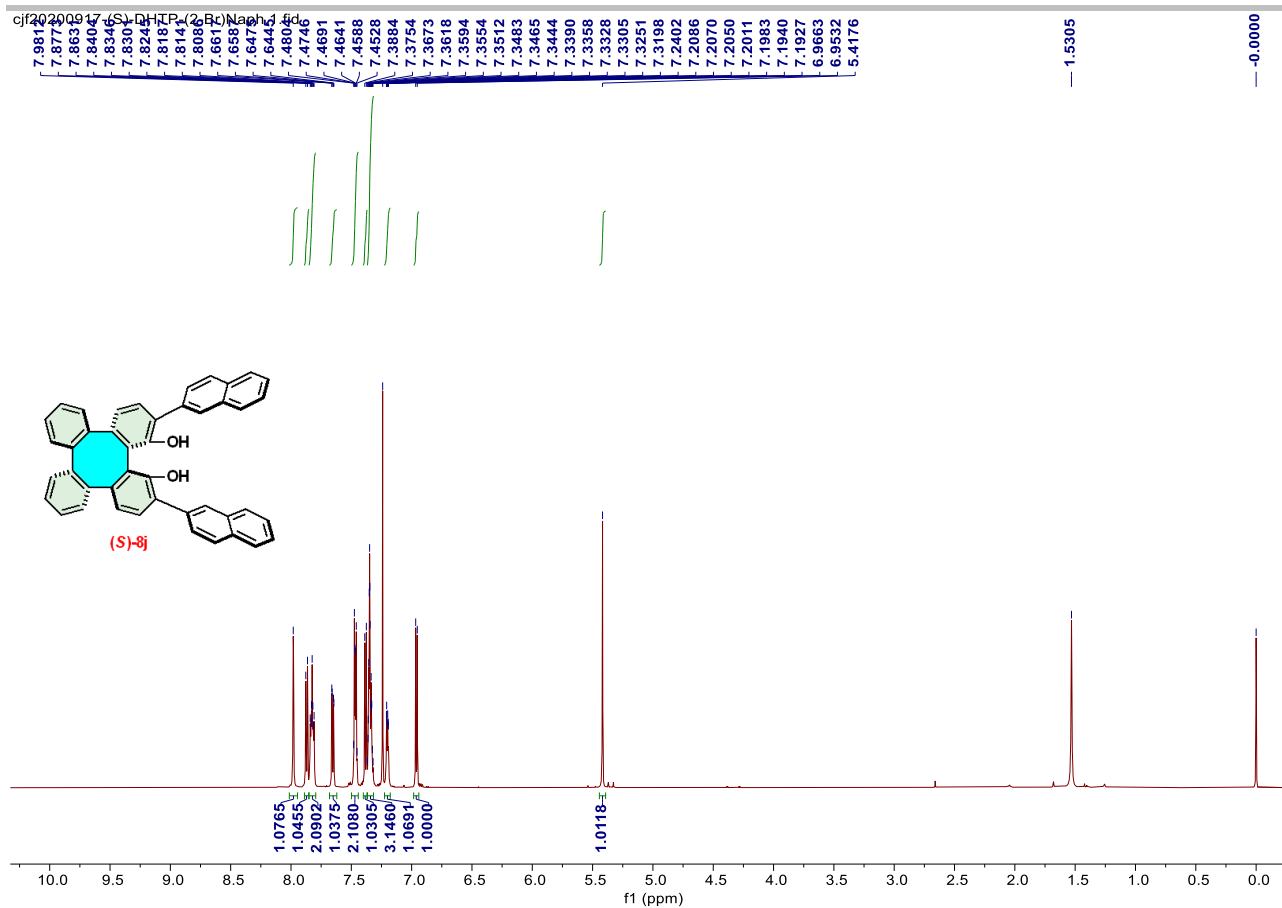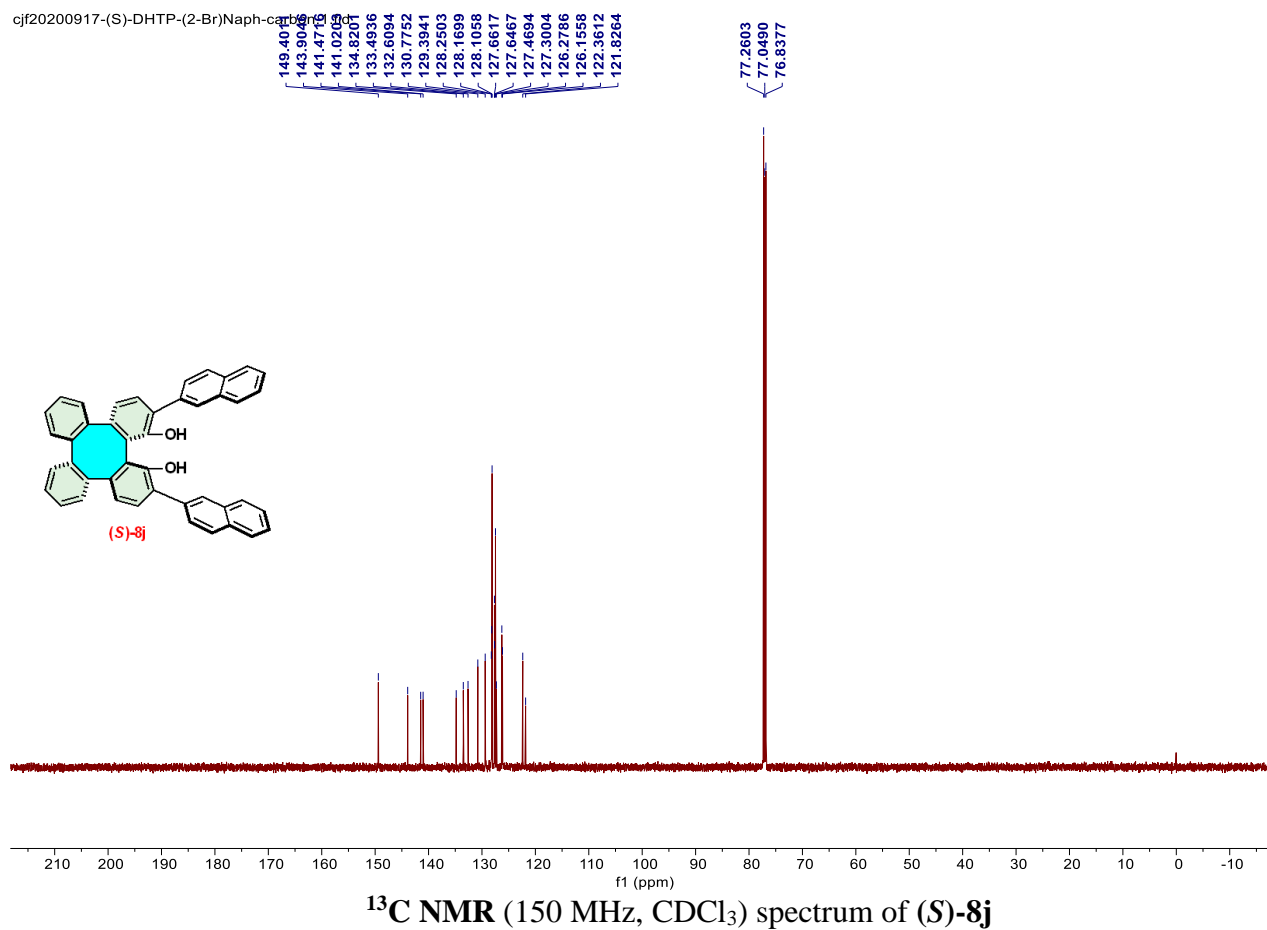

# SUPPORTING INFORMATION

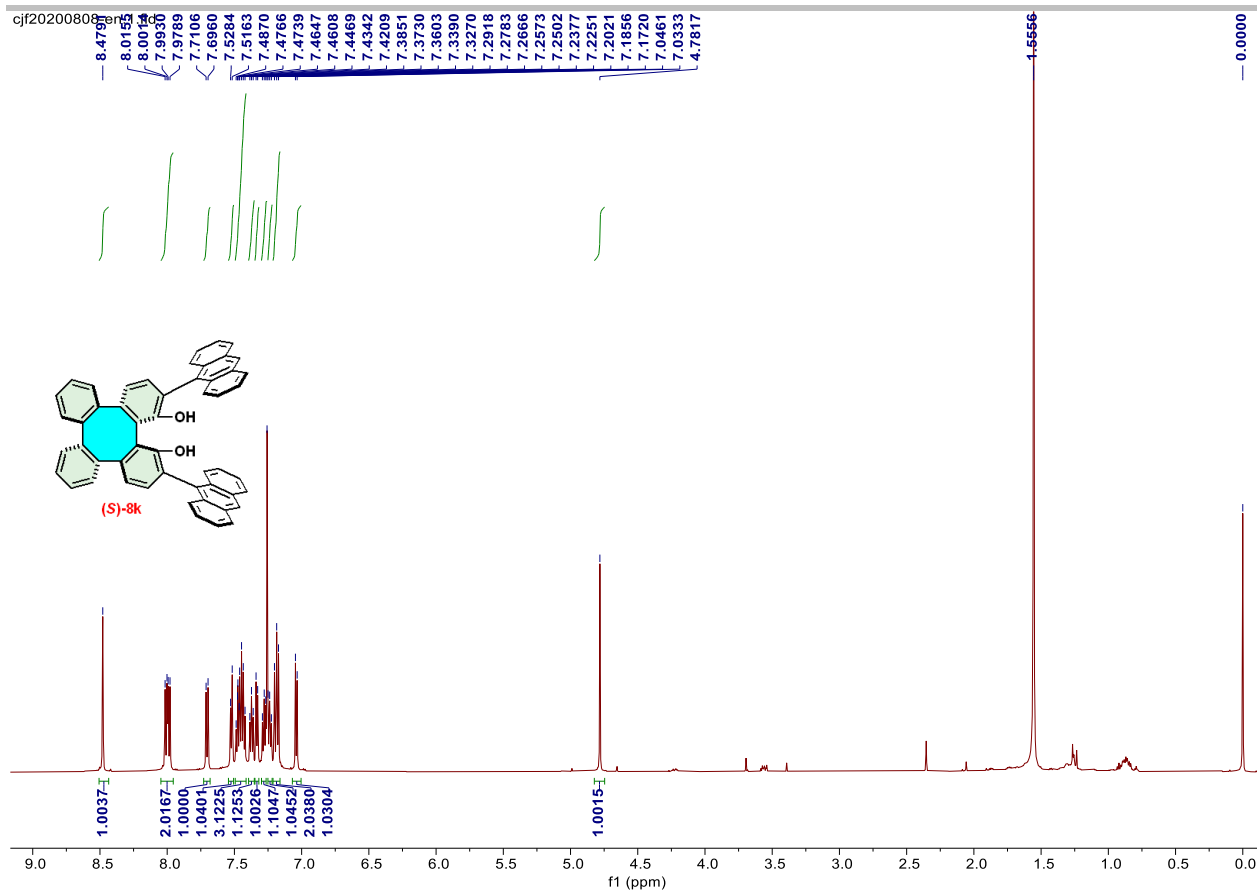

<sup>1</sup>H NMR (600 MHz, CDCl<sub>3</sub>) spectrum of (S)-8k

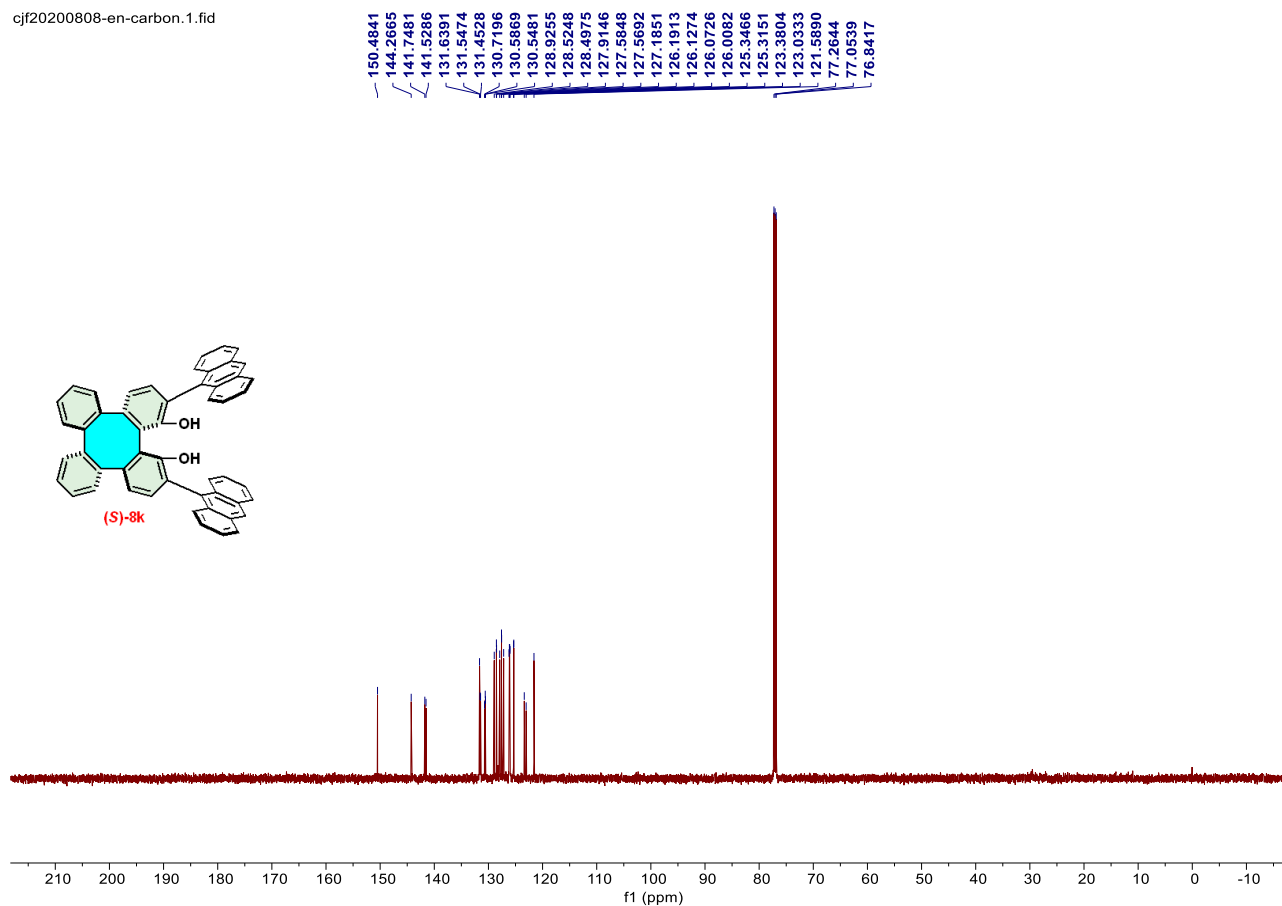

<sup>13</sup>C NMR (150 MHz, CDCl<sub>3</sub>) spectrum of (S)-8k

# SUPPORTING INFORMATION

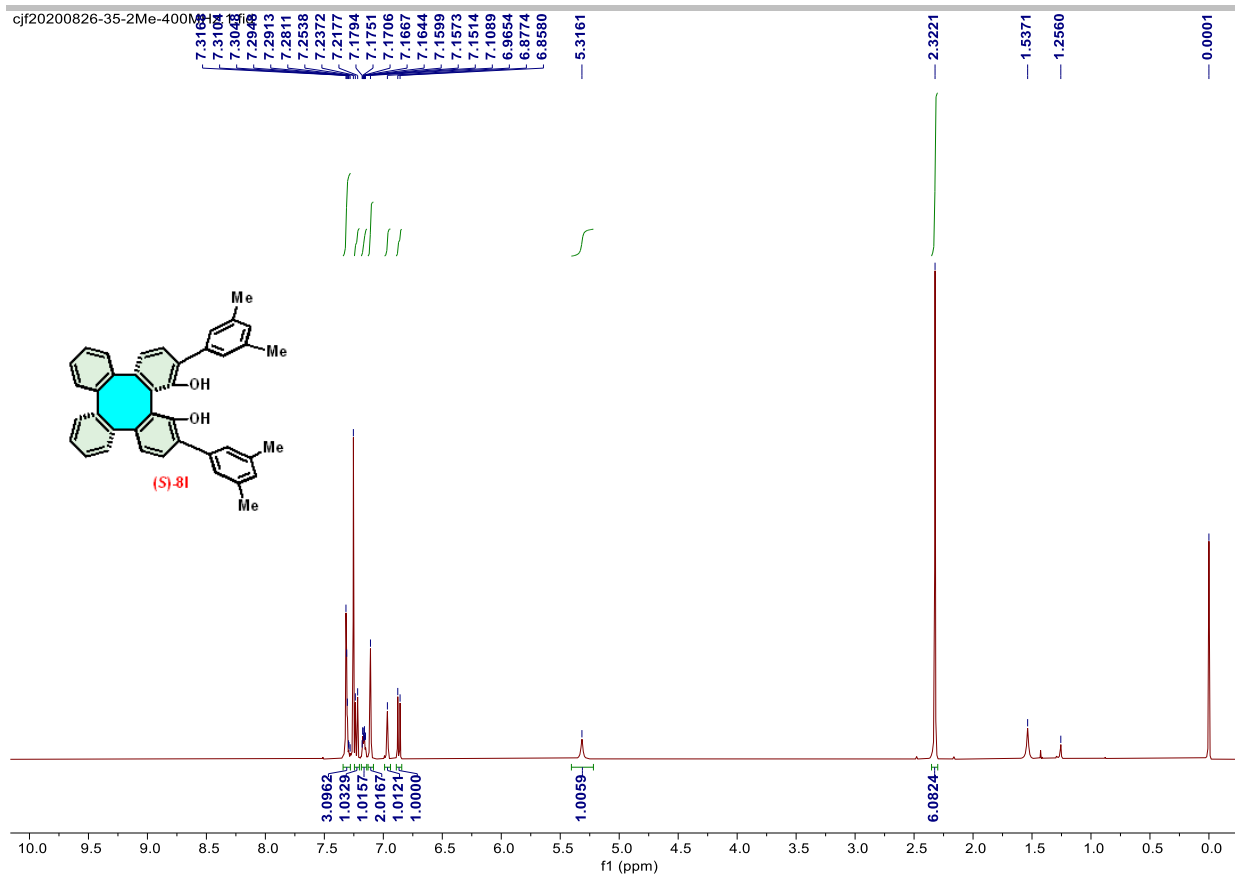

**<sup>1</sup>H NMR (400 MHz, CDCl<sub>3</sub>) spectrum of (S)-8I**

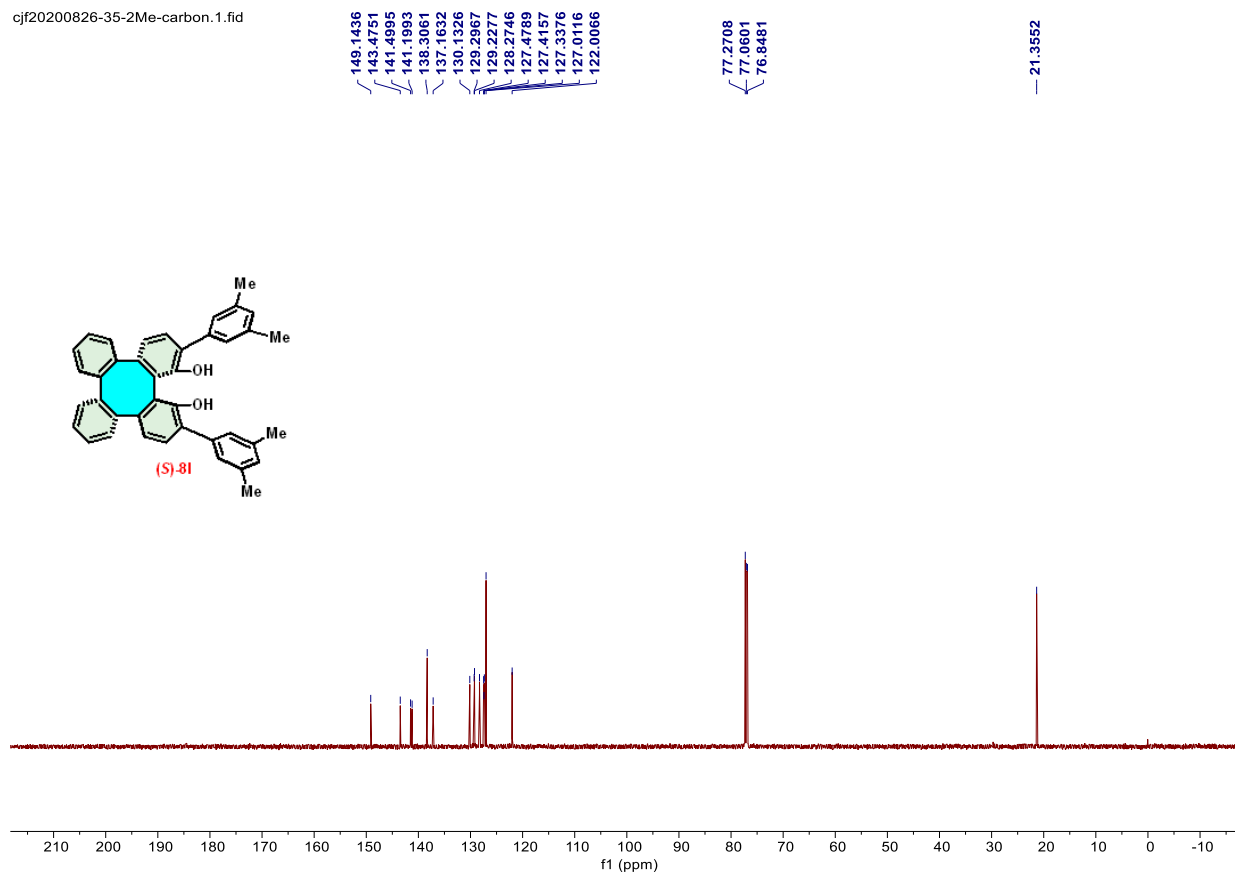

**<sup>13</sup>C NMR (150 MHz, CDCl<sub>3</sub>) spectrum of (S)-8I**

# SUPPORTING INFORMATION

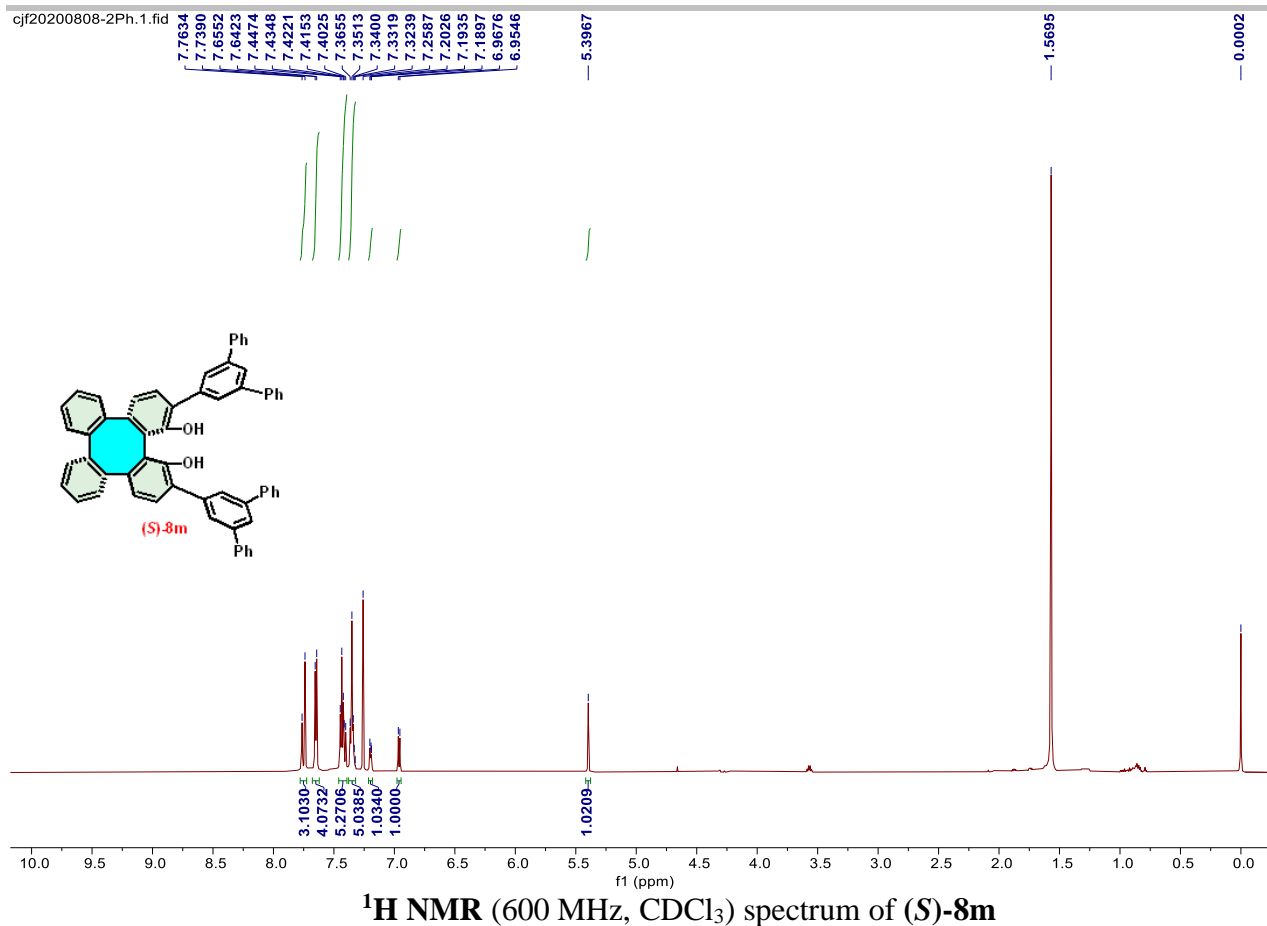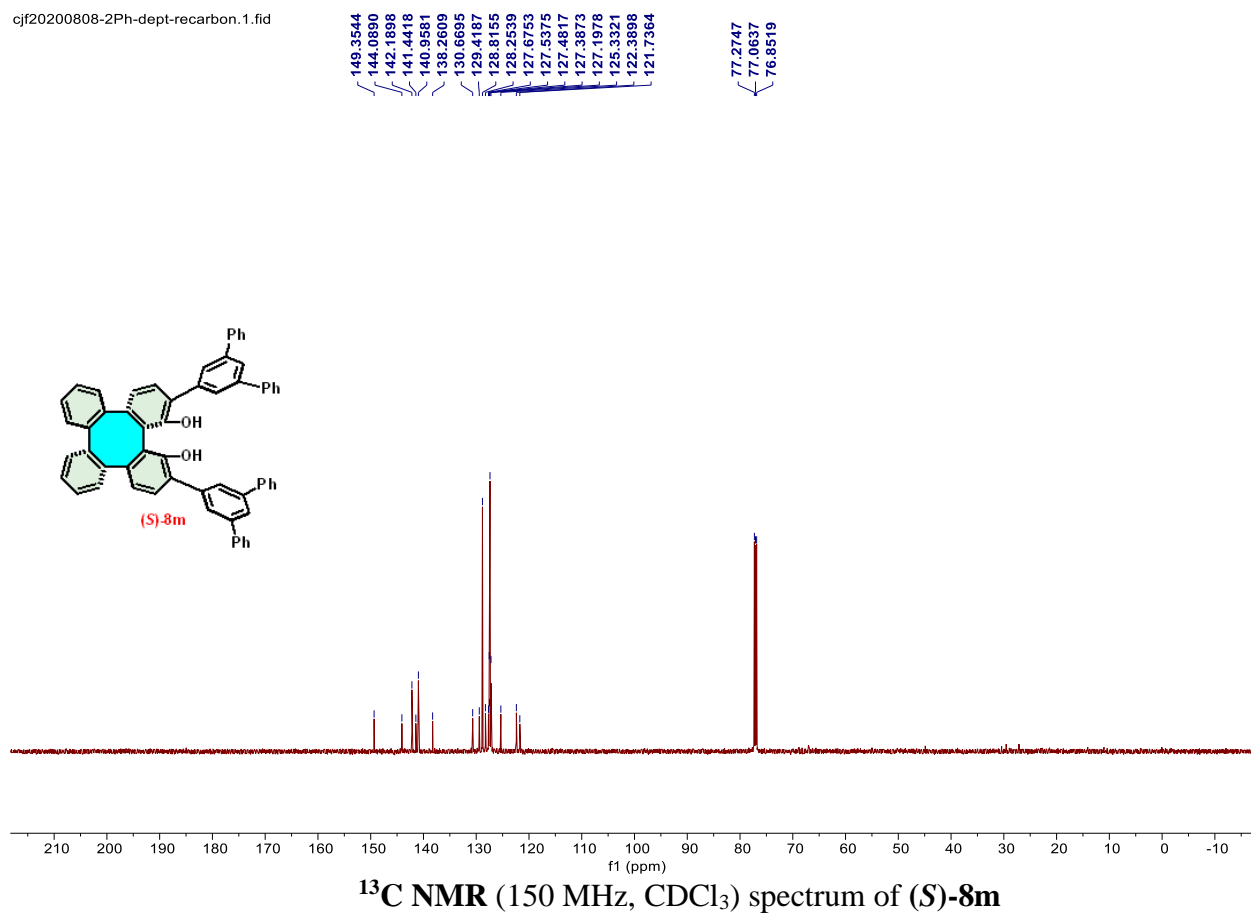

# SUPPORTING INFORMATION

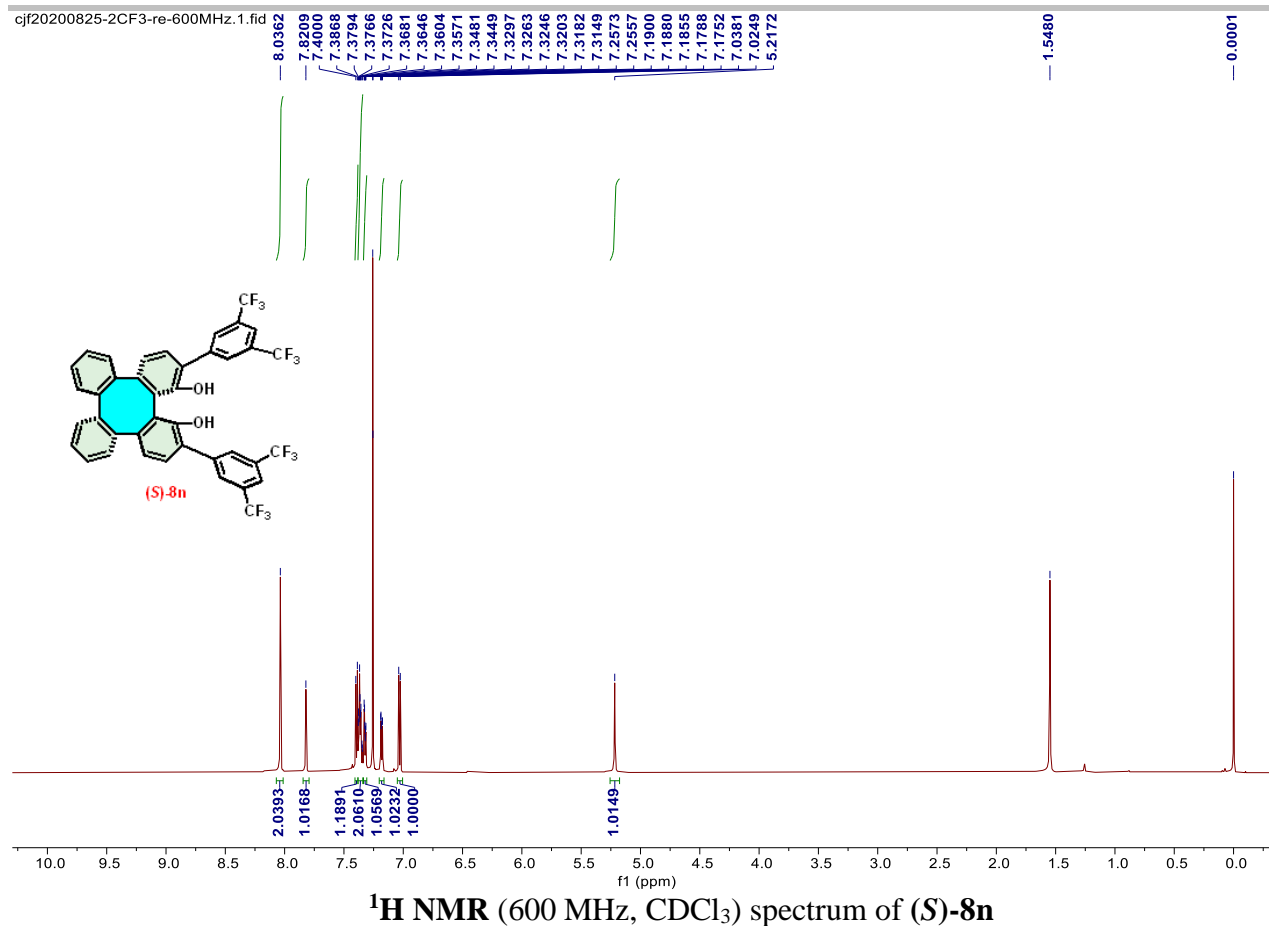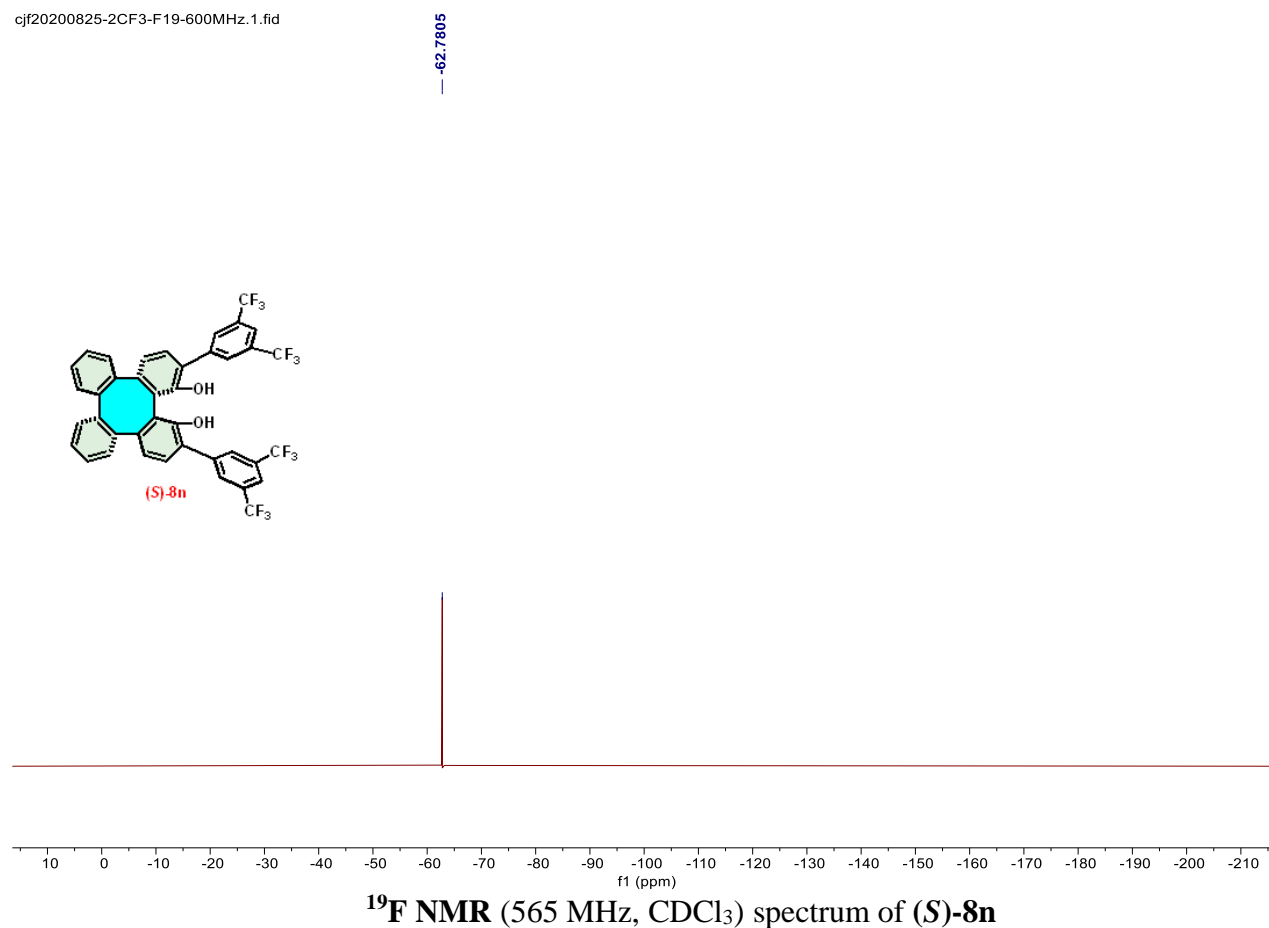

# SUPPORTING INFORMATION

cj20200825-2CF3-carbon.1.fid

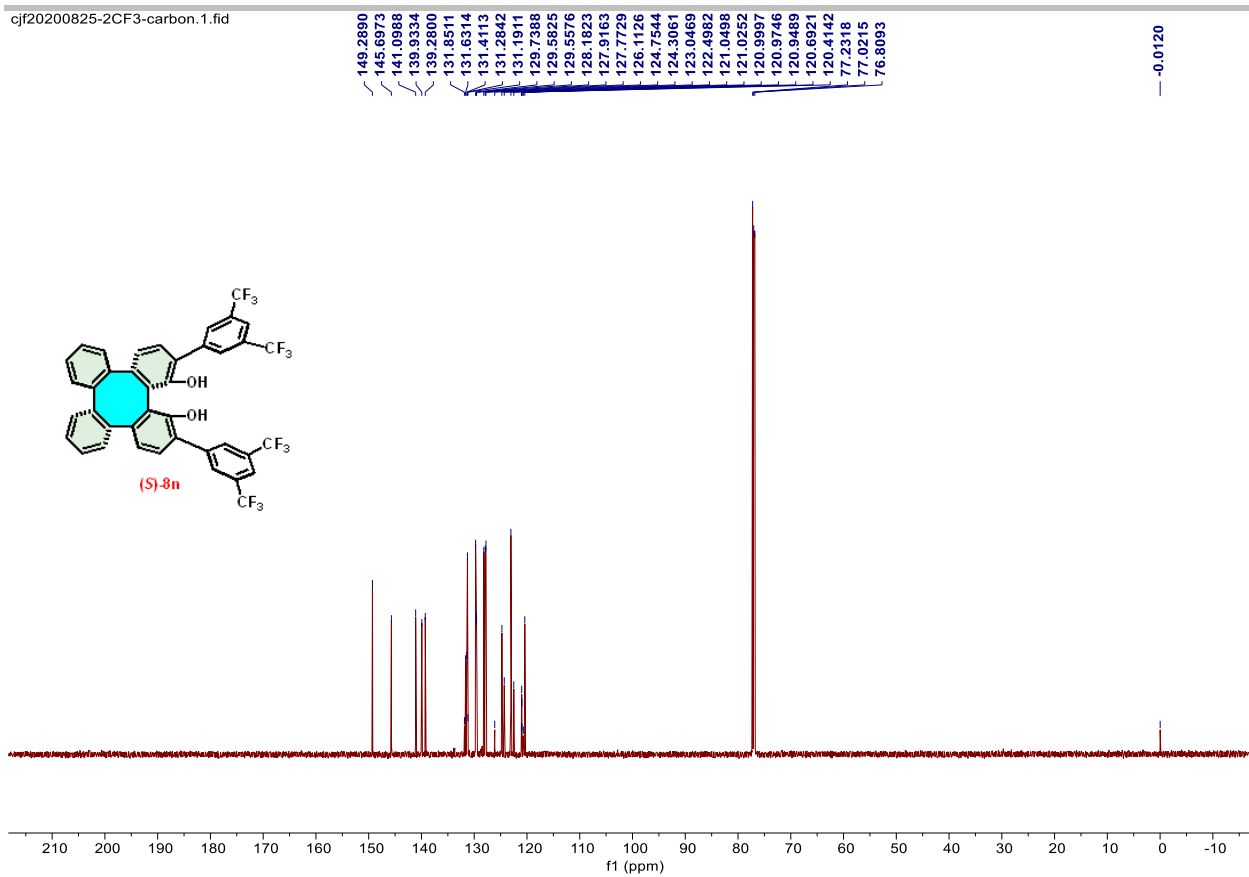

$^{13}\text{C}$  NMR (150 MHz,  $\text{CDCl}_3$ ) spectrum of (S)-8n



# SUPPORTING INFORMATION

cfj20200808-2Me-1OMe.1.fid

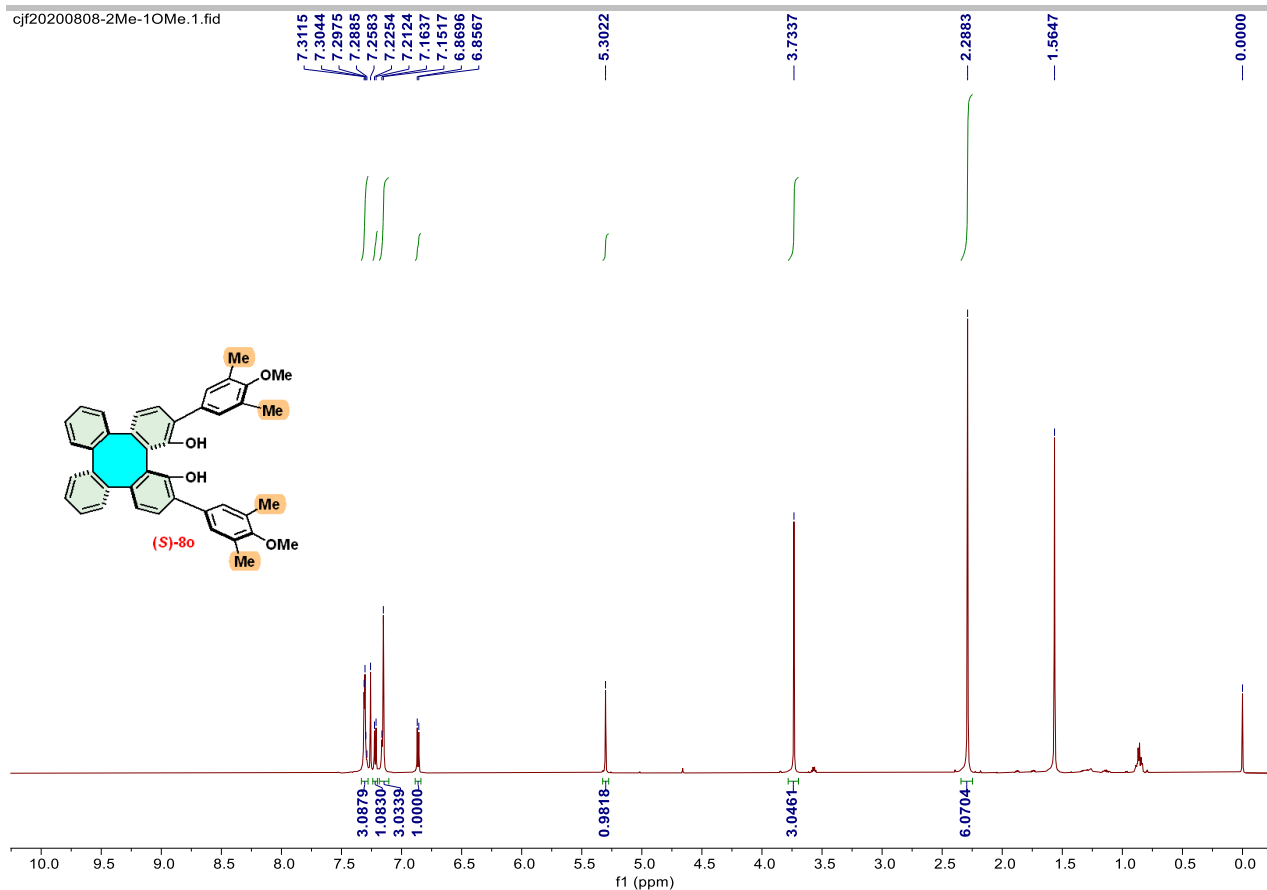

cfj20200808-2Me-1OMe-carbon.1.fid

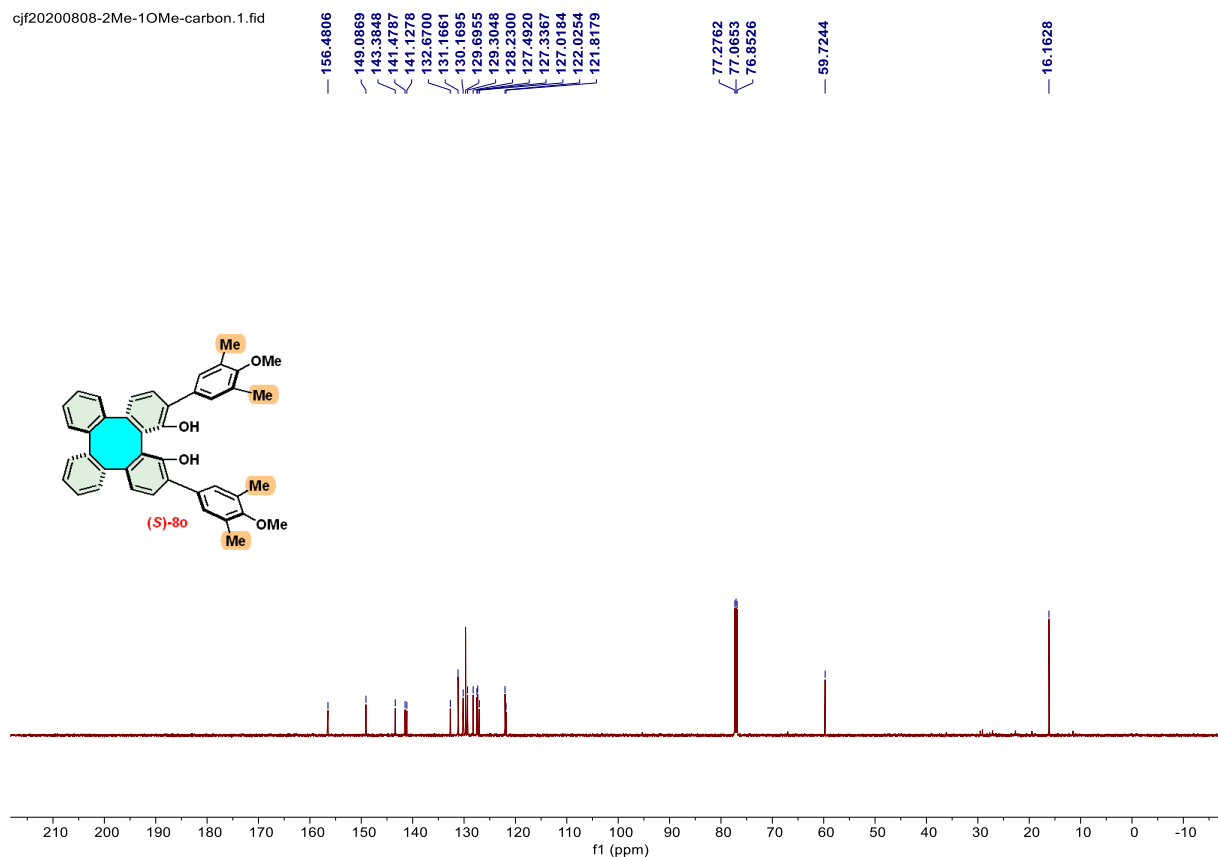

# SUPPORTING INFORMATION

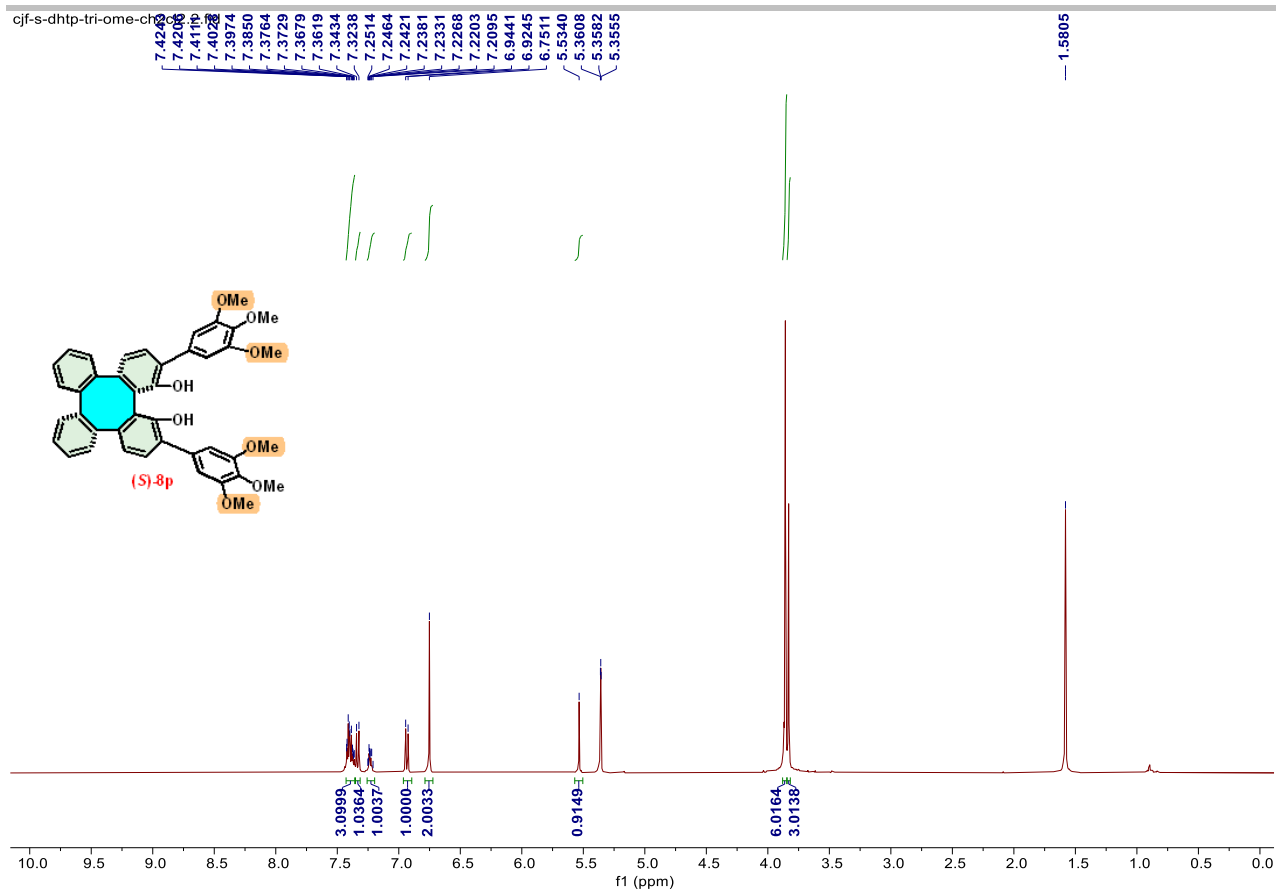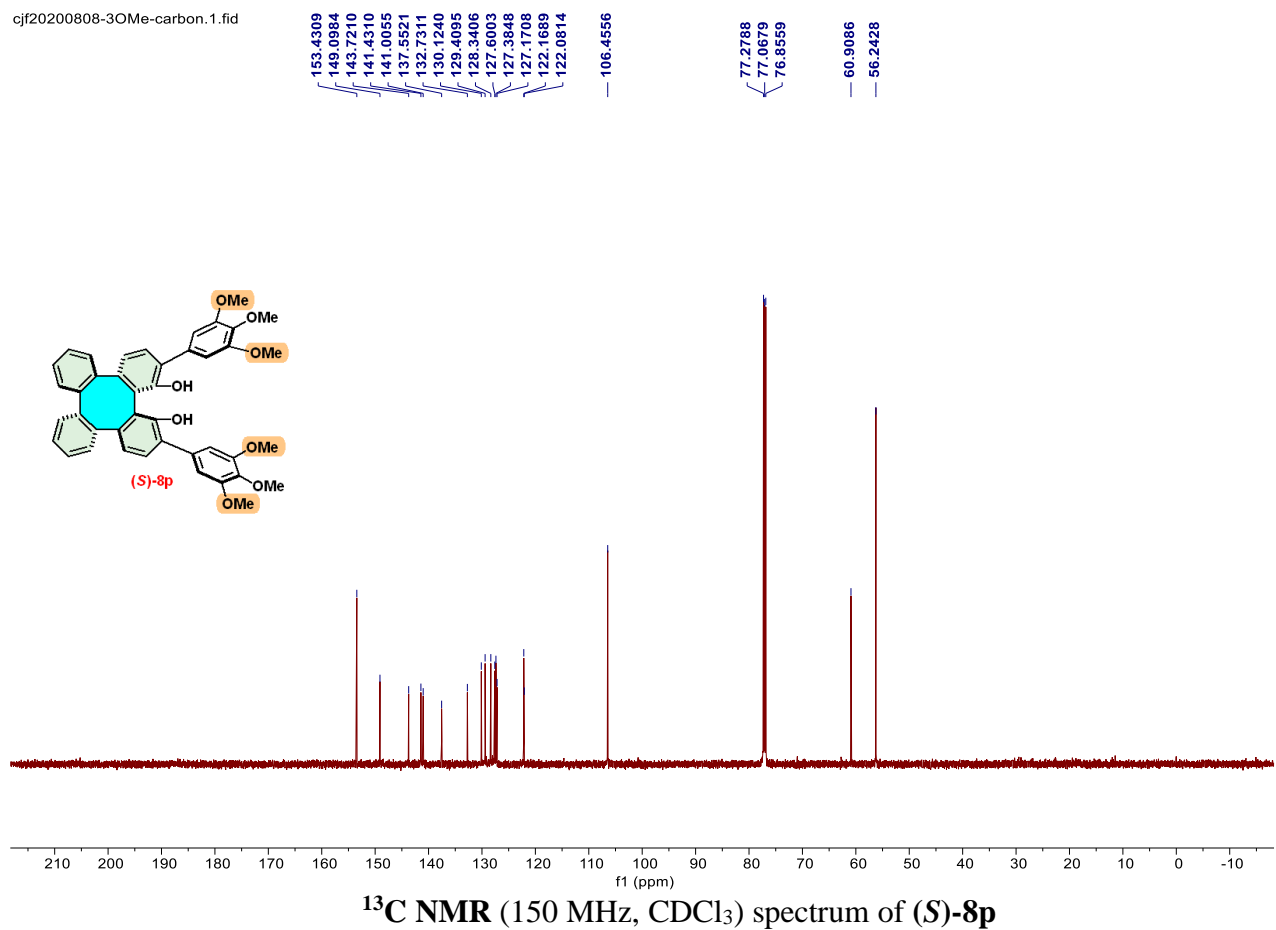

# SUPPORTING INFORMATION

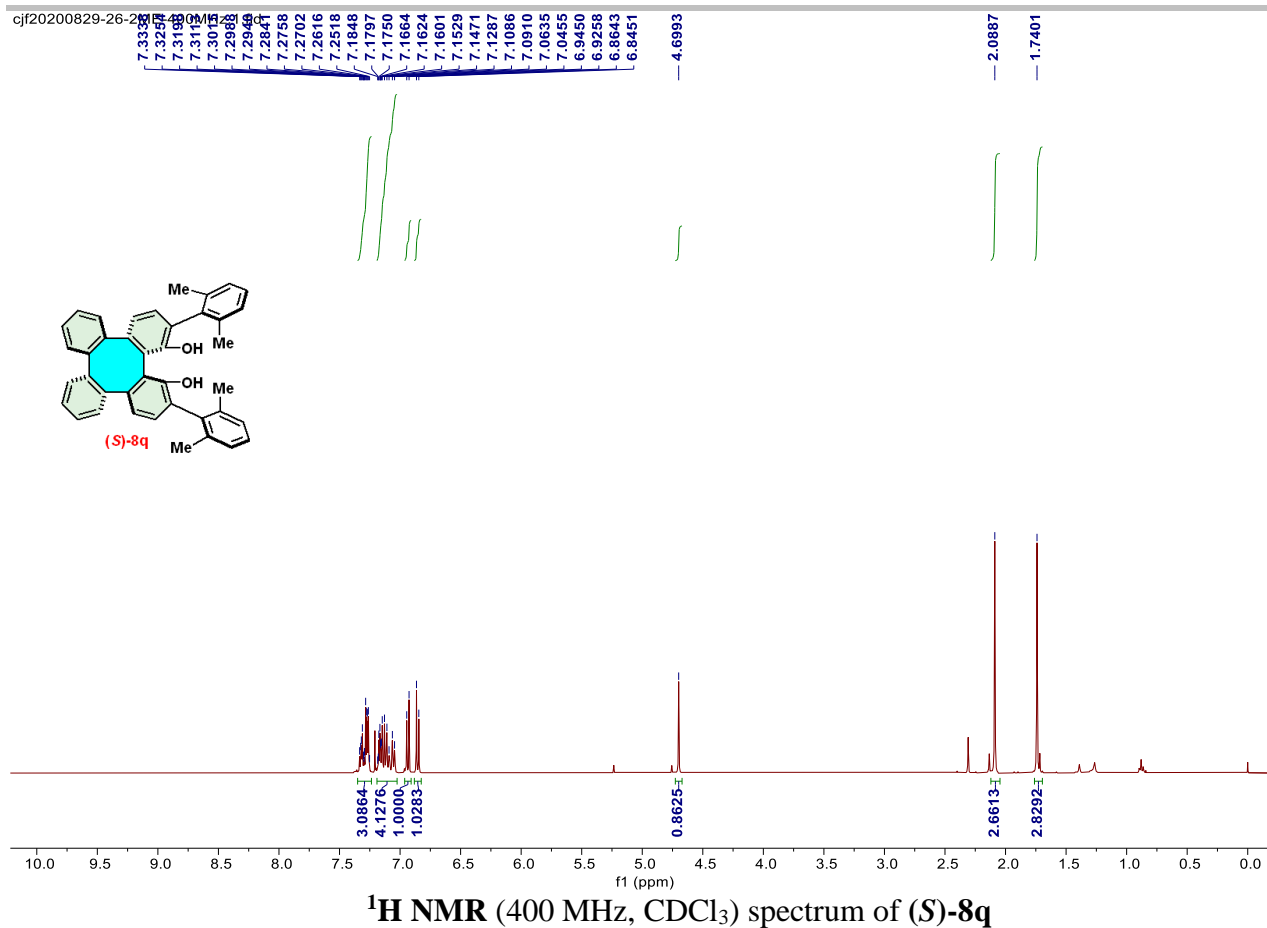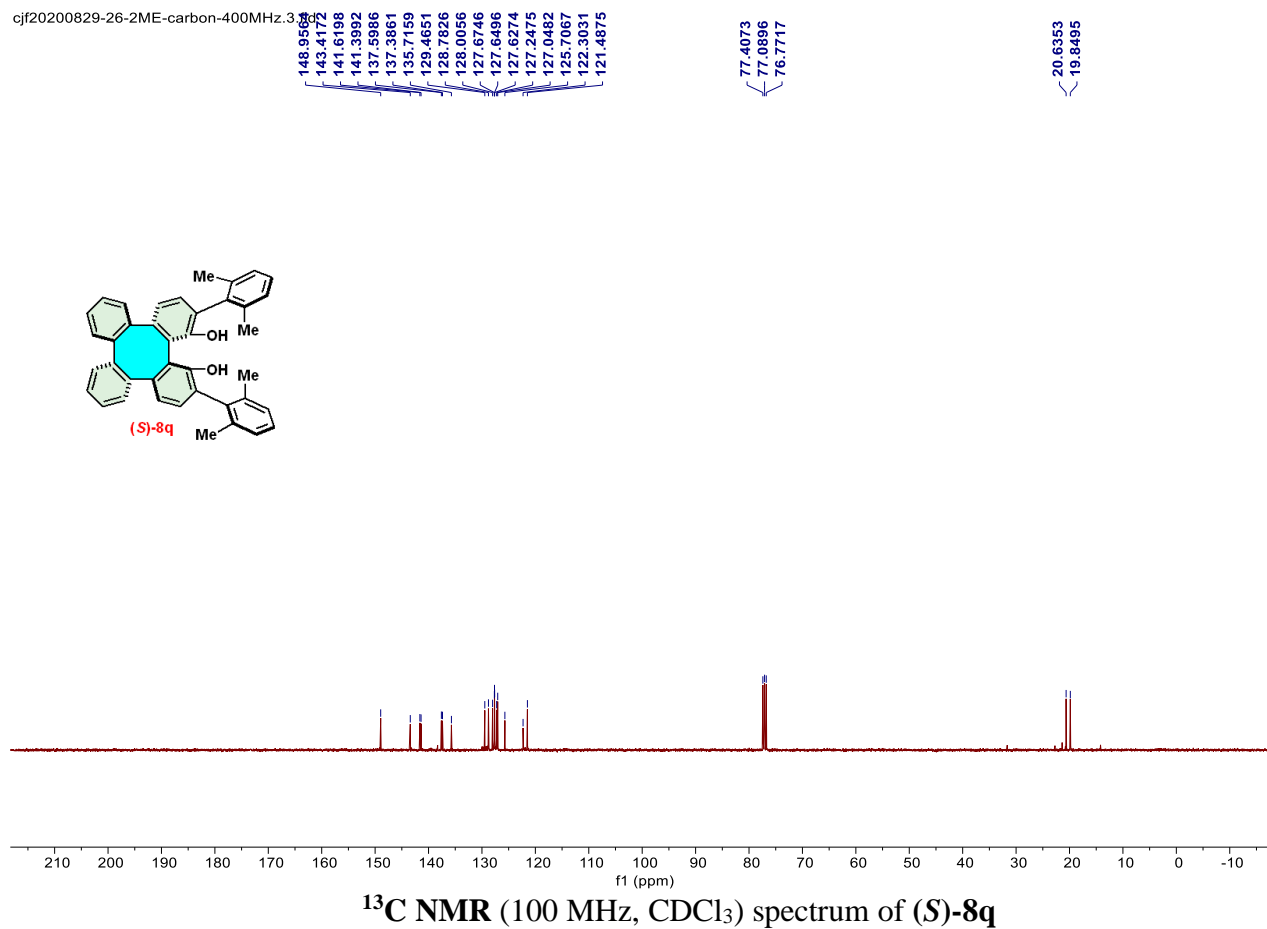

# SUPPORTING INFORMATION

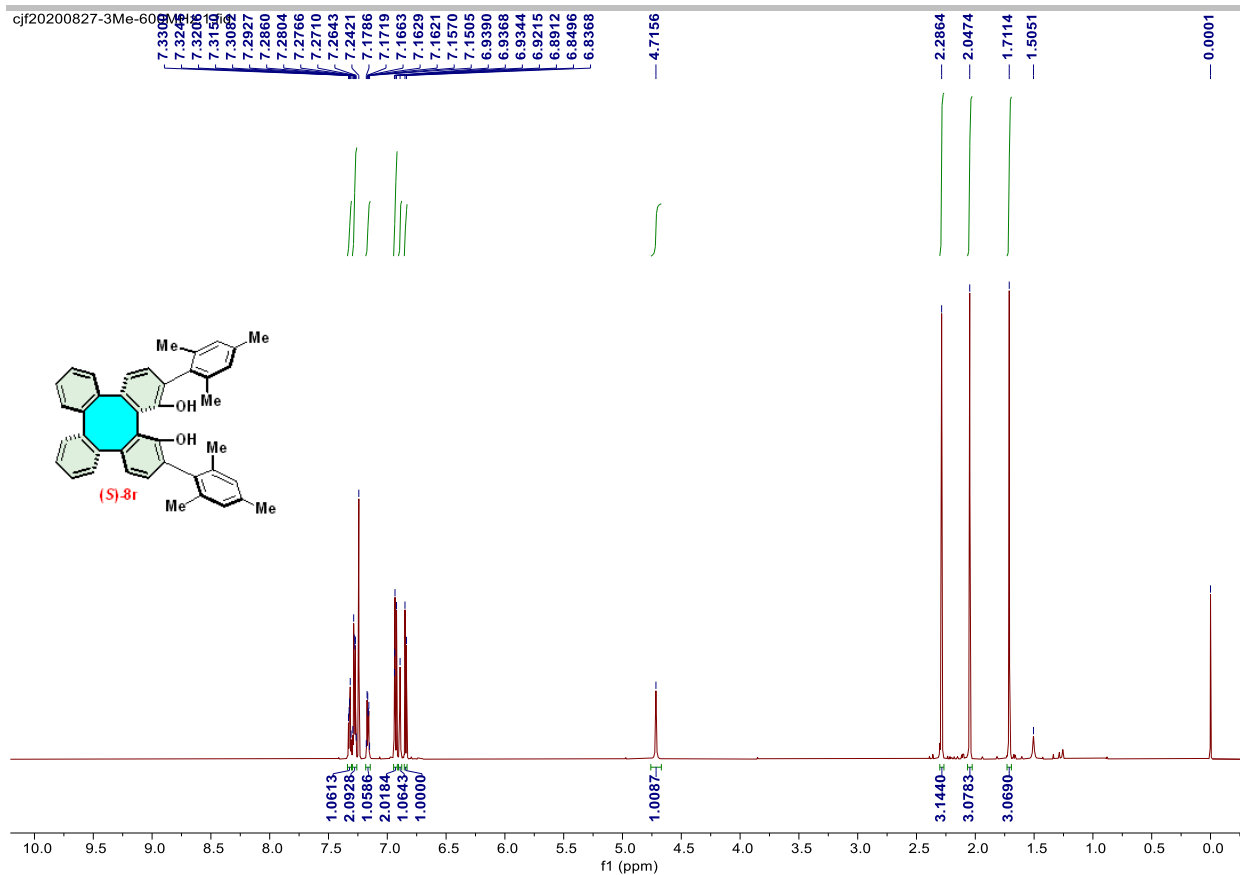

**<sup>1</sup>H NMR (600 MHz, CDCl<sub>3</sub>) spectrum of (S)-8r**

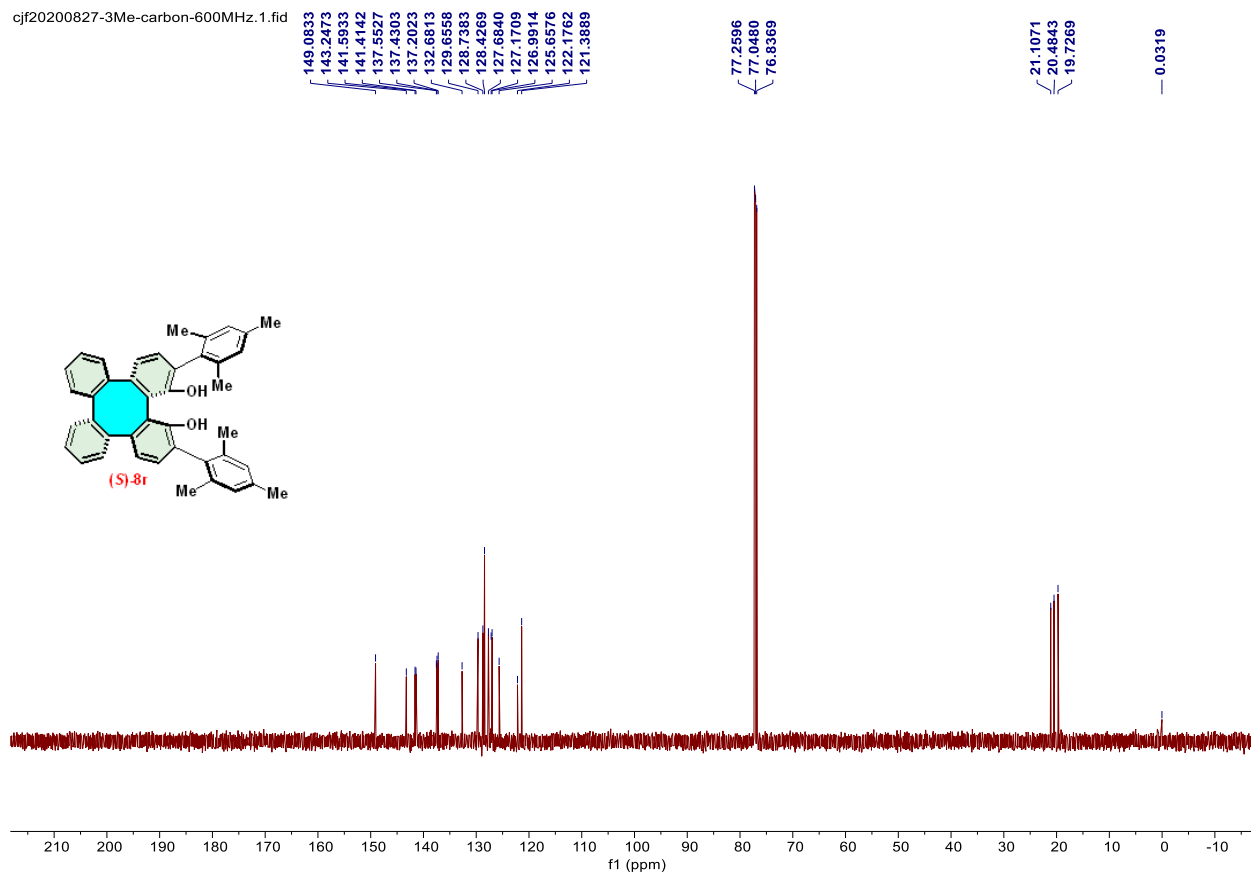

**<sup>13</sup>C NMR (150 MHz, CDCl<sub>3</sub>) spectrum of (S)-8r**

# SUPPORTING INFORMATION

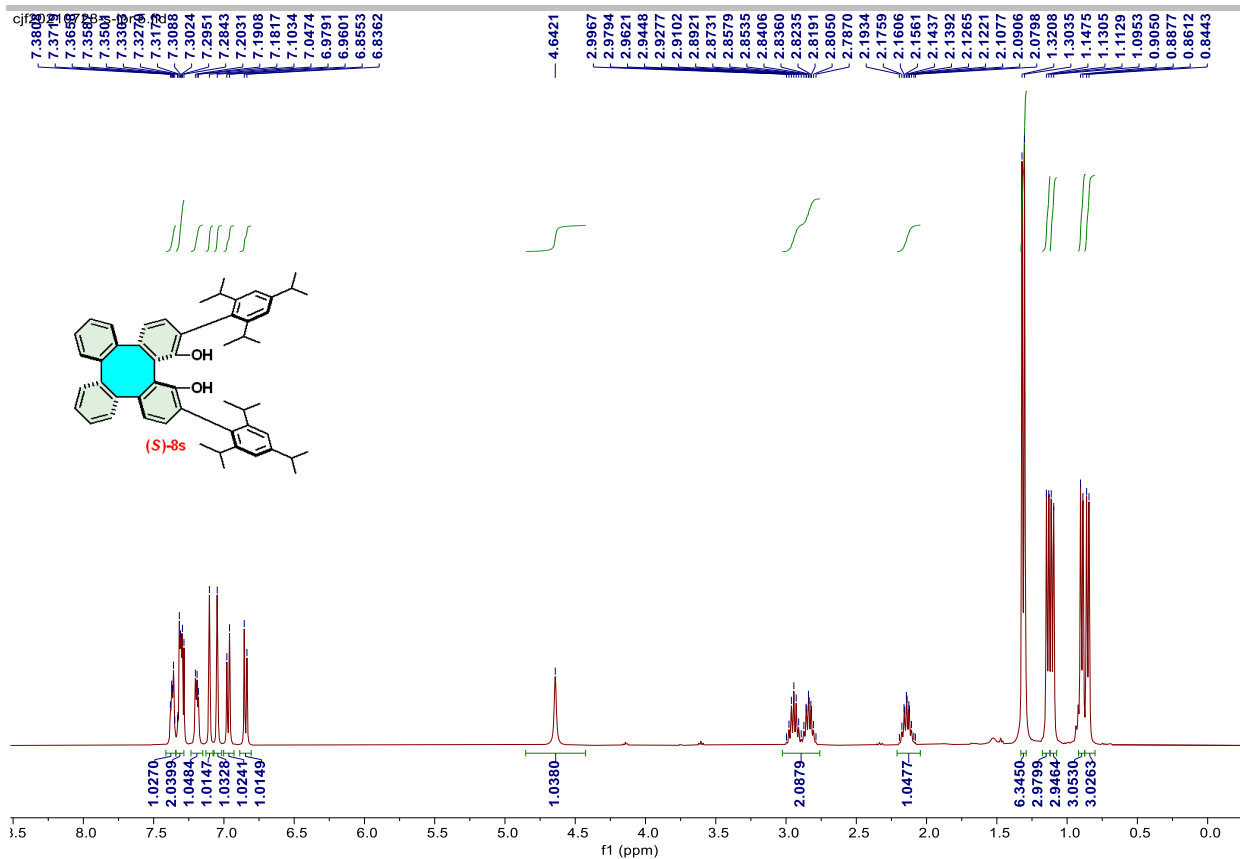

cjf-20210728-s-1pr-cl3-odcl3.11.fid

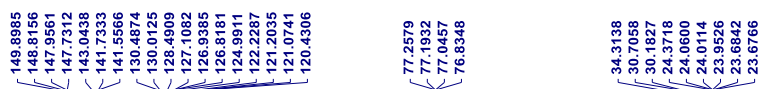

# SUPPORTING INFORMATION

cfj-20210809-s-cy.10.fid

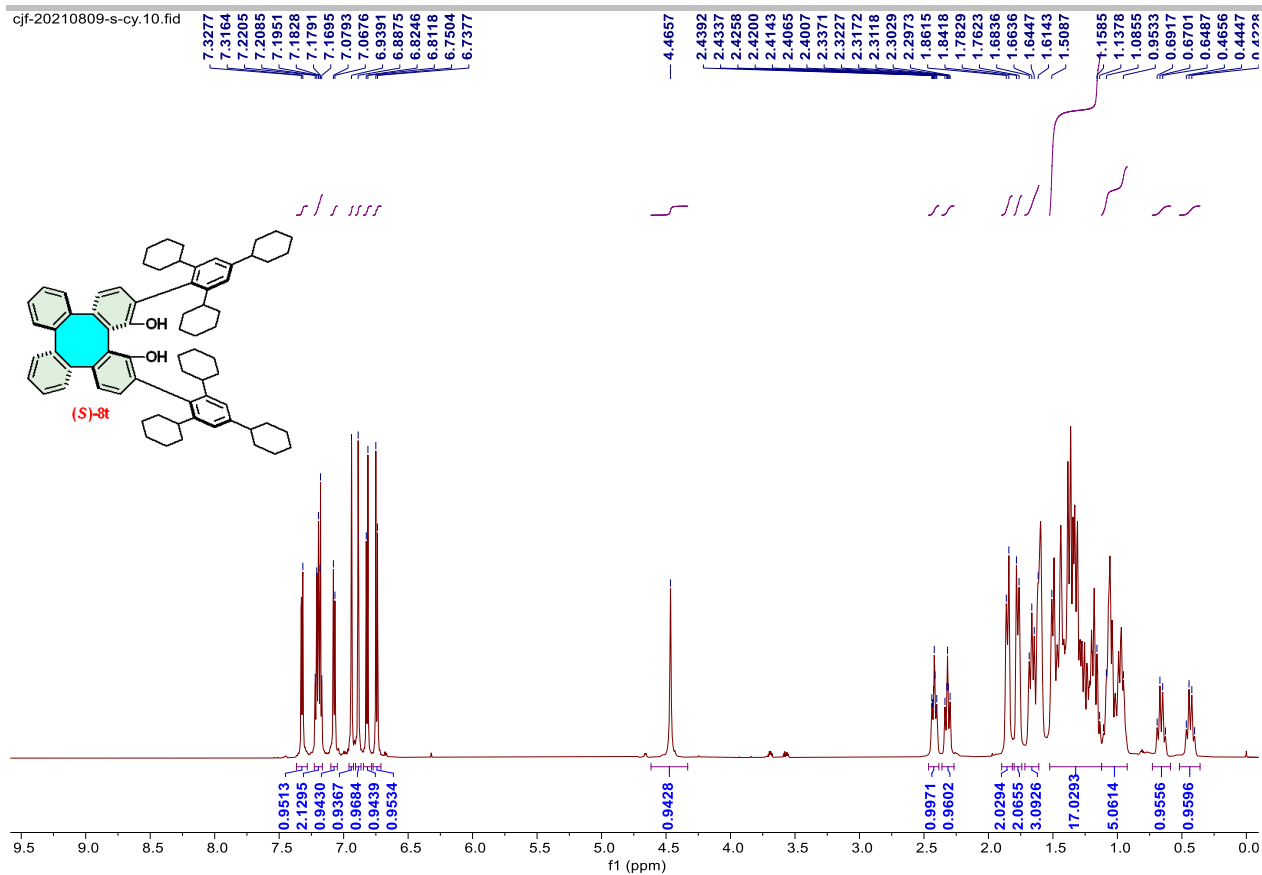

cfj-20210809-s-cy.11.fid

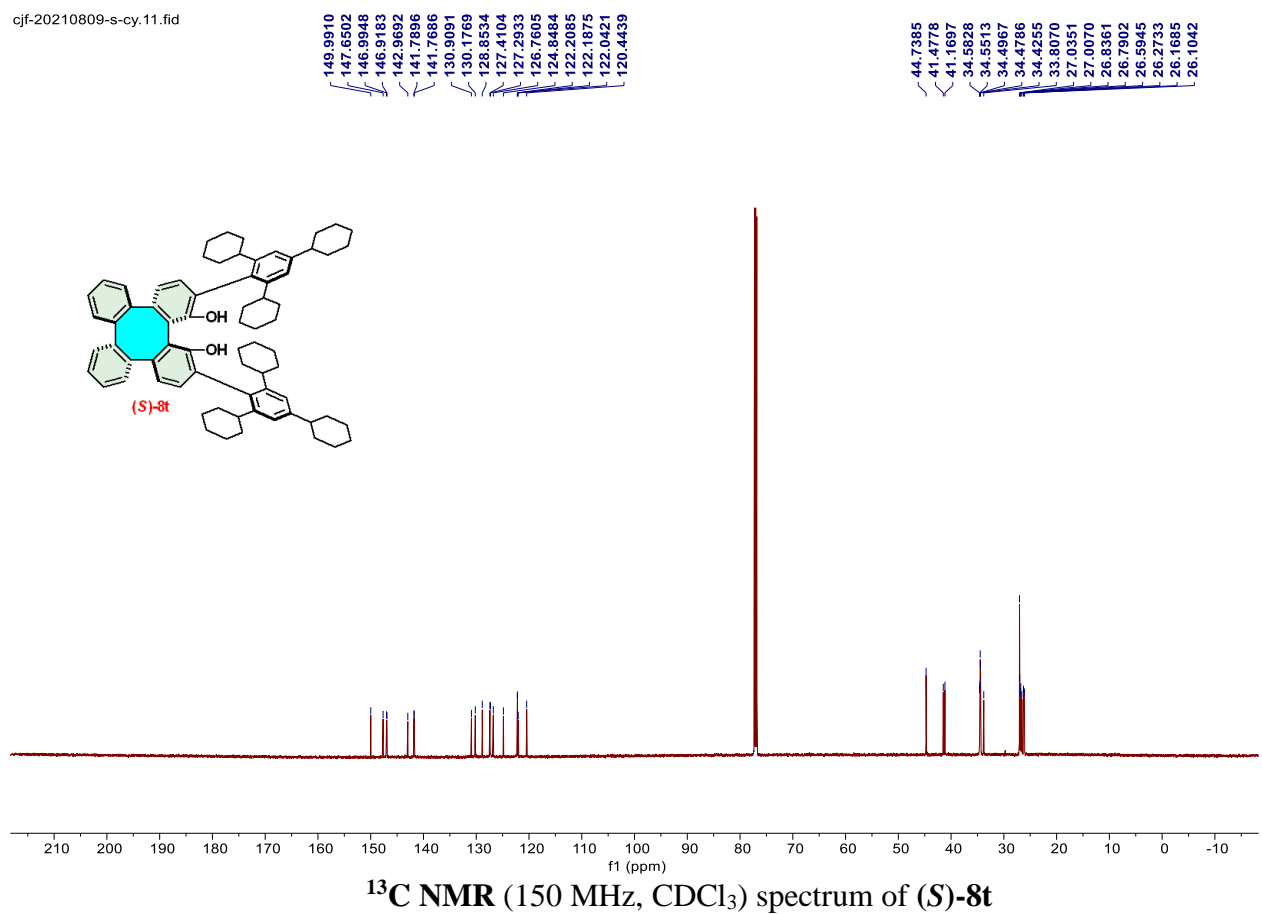

# SUPPORTING INFORMATION

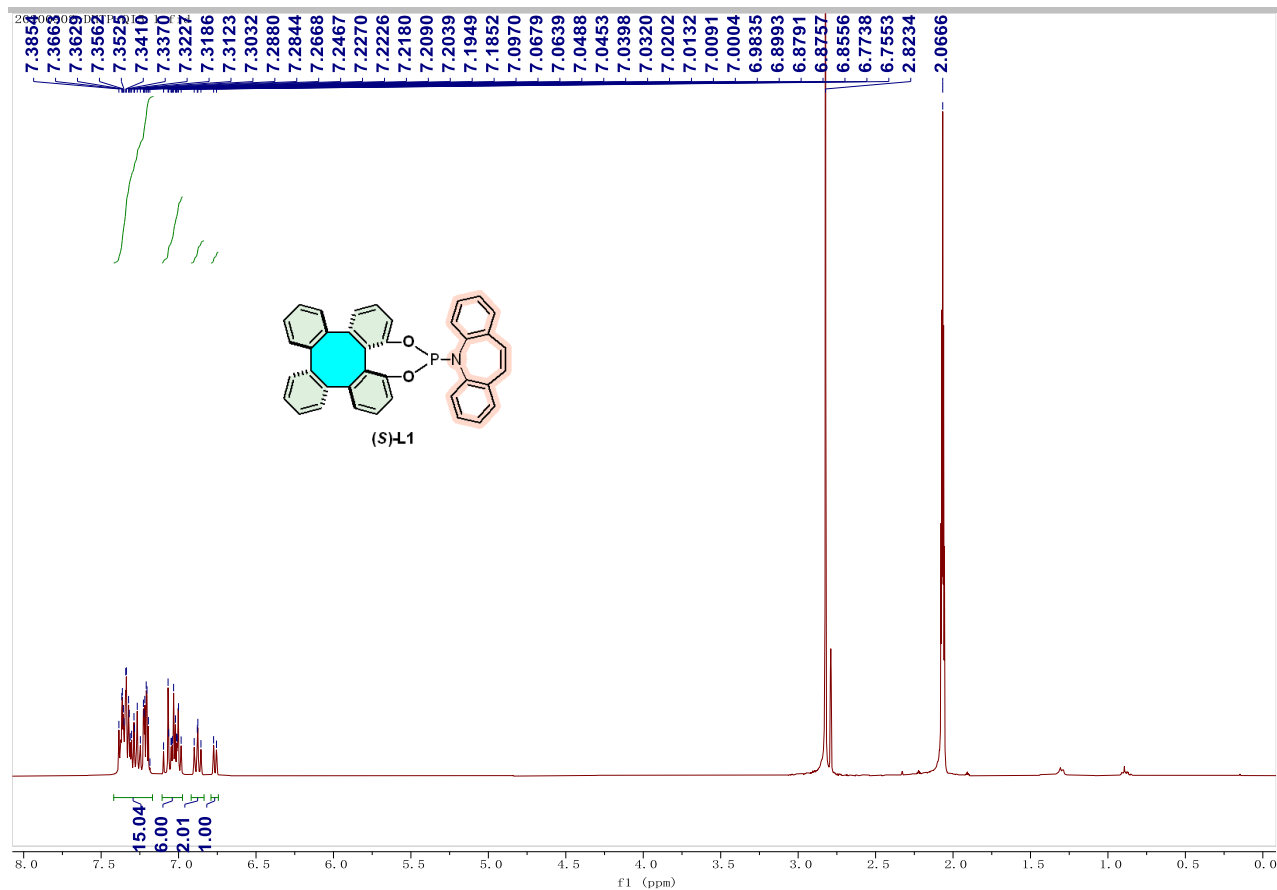

**<sup>1</sup>H NMR (400 MHz, Acetone-*d*<sub>6</sub>) spectrum of (S)-L1**

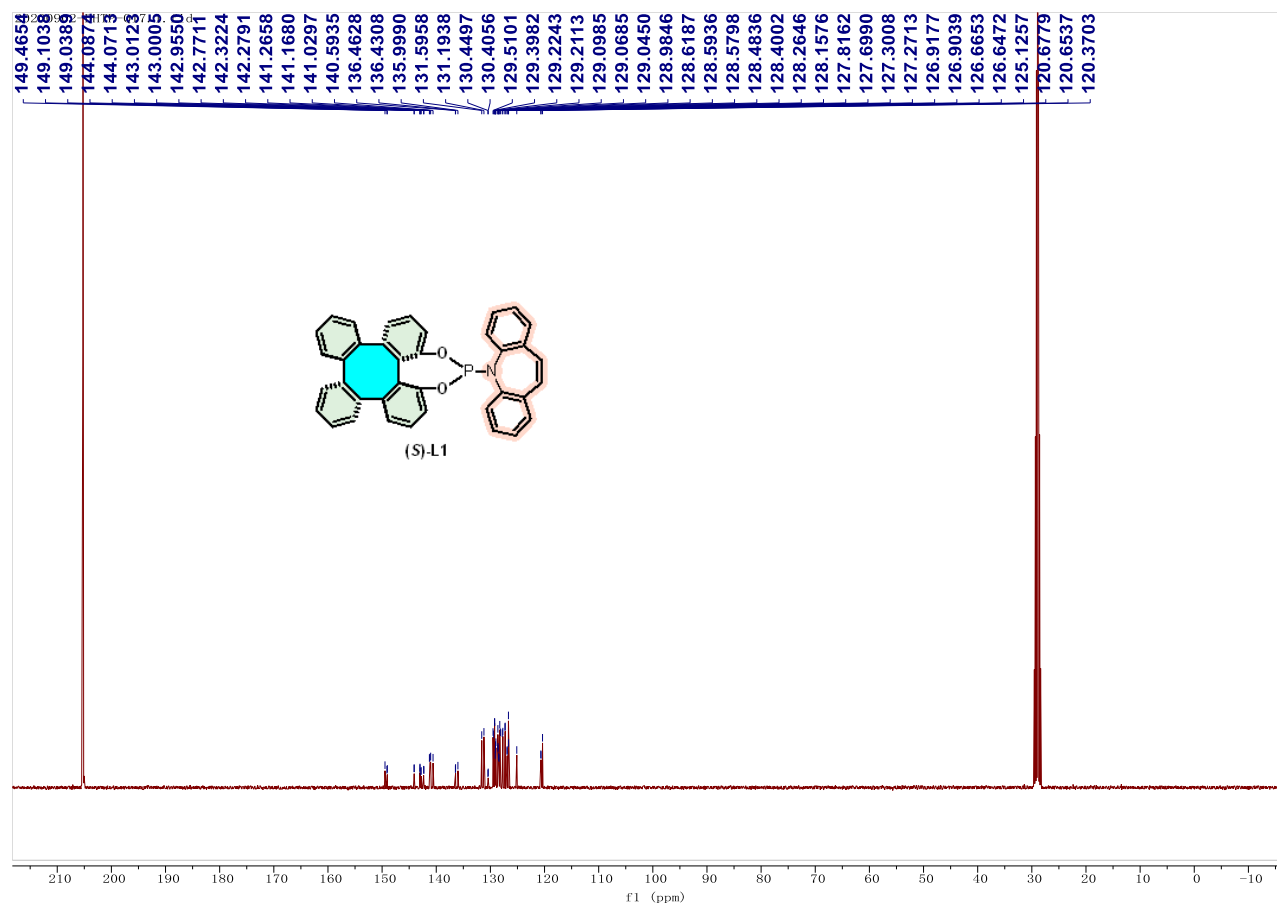

**<sup>13</sup>C NMR (100 MHz, Acetone-*d*<sub>6</sub>) spectrum of (S)-L1**

# SUPPORTING INFORMATION

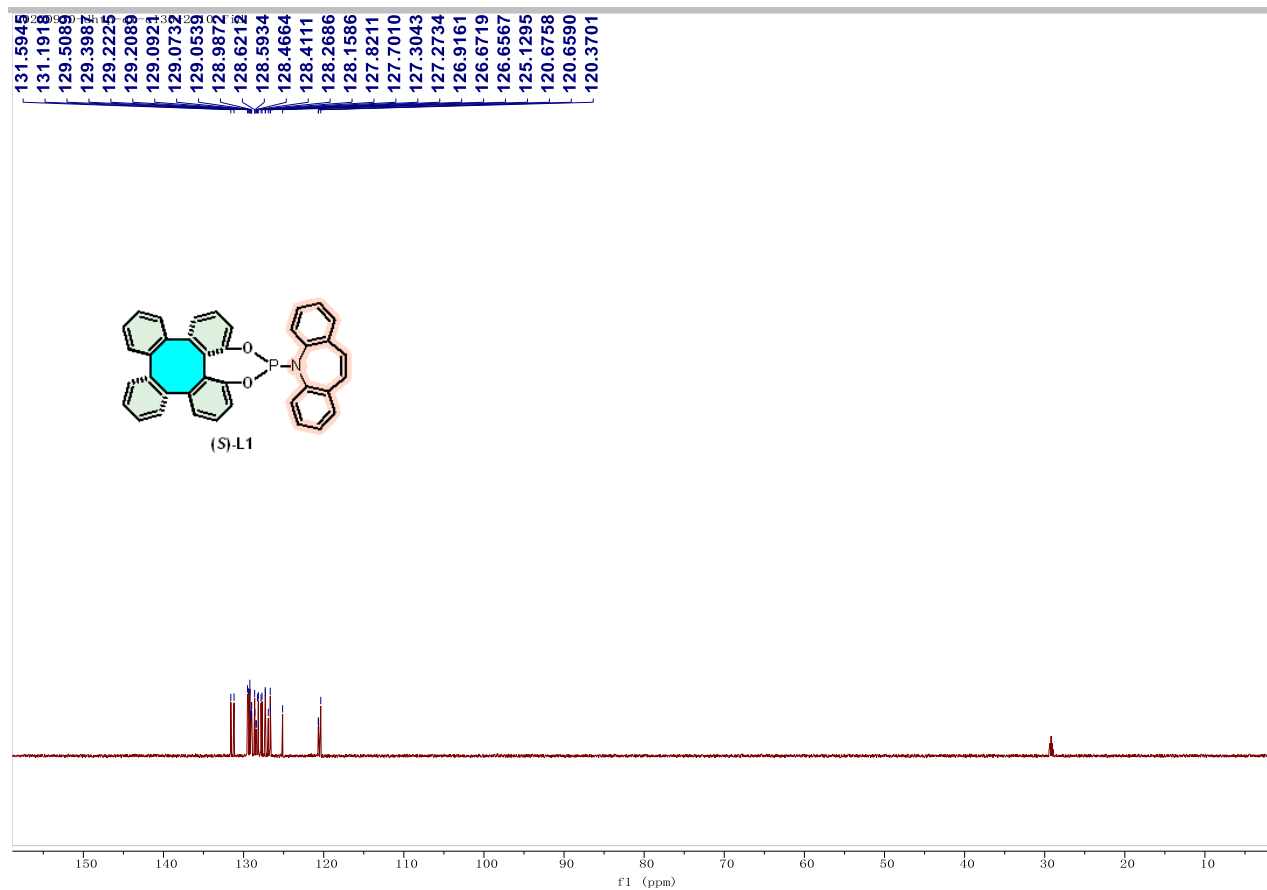

DEPT135  $^{13}\text{C}$  NMR (150 MHz, Acetone- $d_6$ ) spectrum of (S)-L1

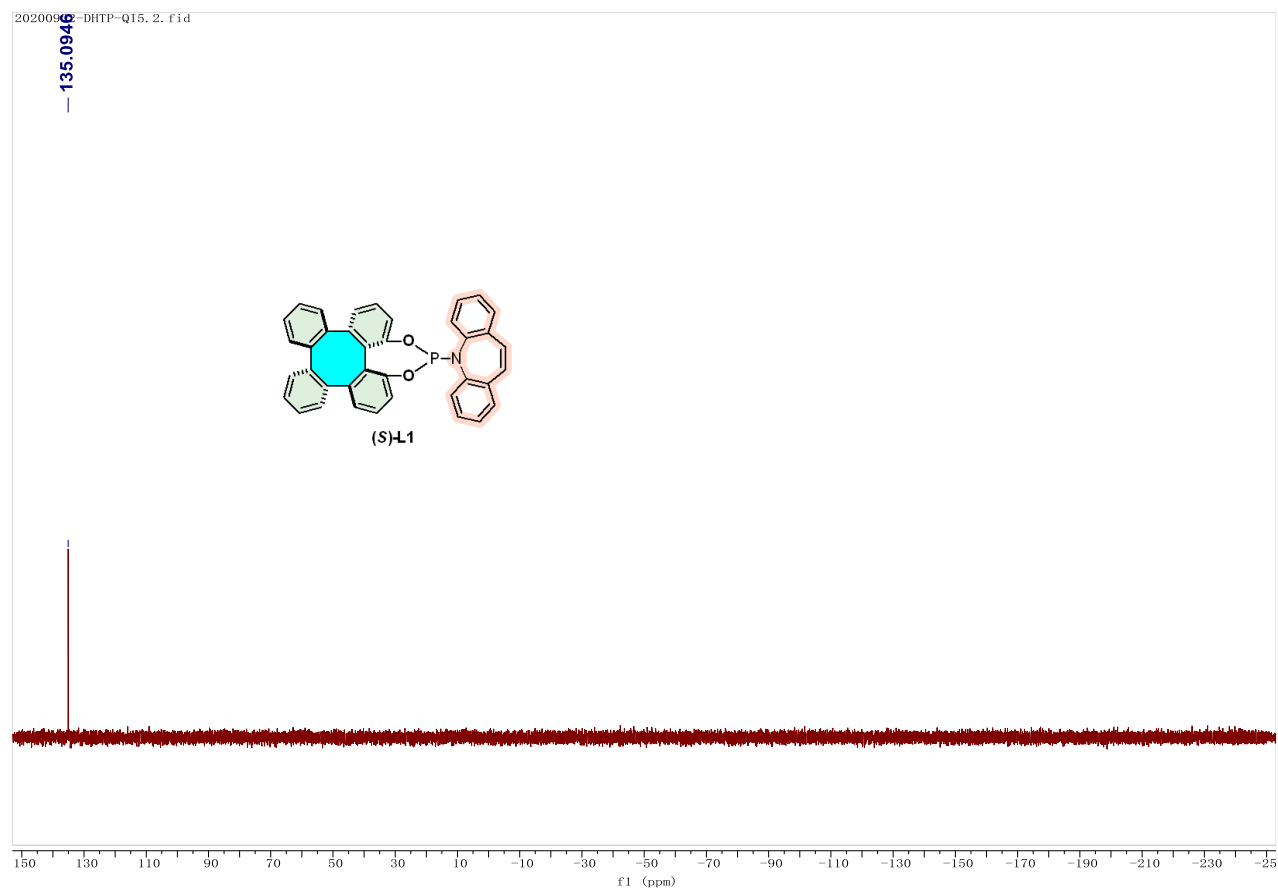

$^{31}\text{P}$  NMR (162 MHz, Acetone- $d_6$ ) spectrum of (S)-L1



# SUPPORTING INFORMATION

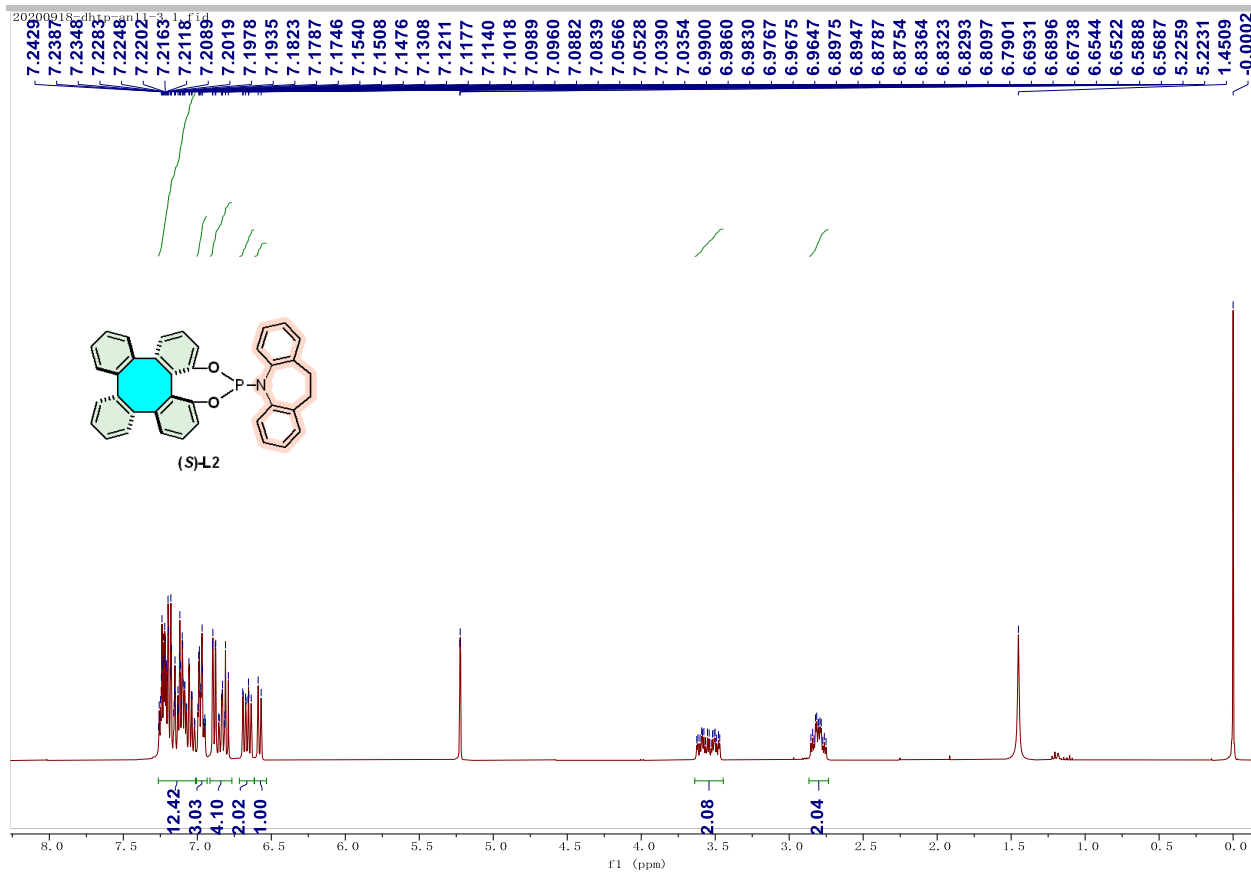

$^1\text{H}$  NMR (400 MHz,  $\text{CD}_2\text{Cl}_2$ ) spectrum of (S)-L2

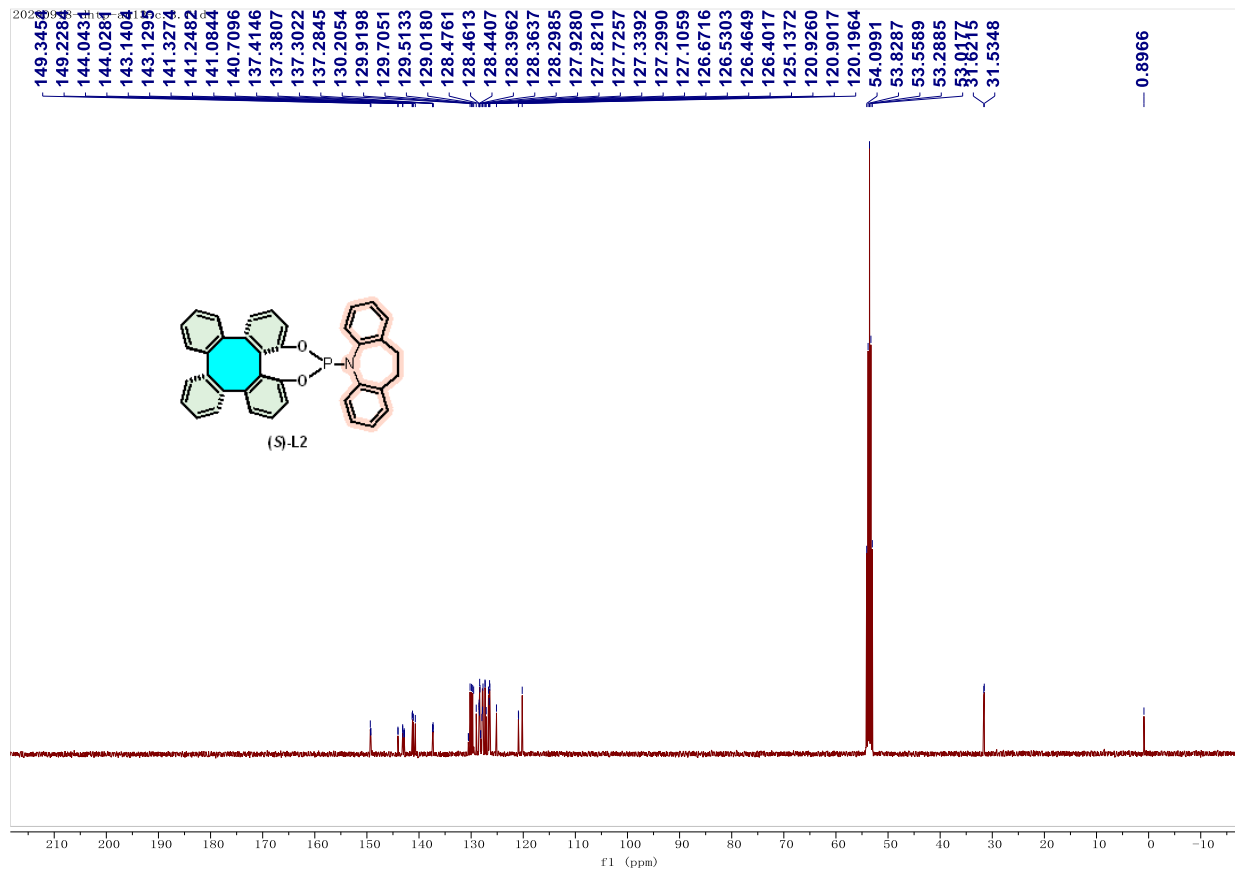

$^{13}\text{C}$  NMR (100 MHz,  $\text{CD}_2\text{Cl}_2$ ) spectrum of (S)-L2

# SUPPORTING INFORMATION

20200918 dhtp-an11-3.2.fid

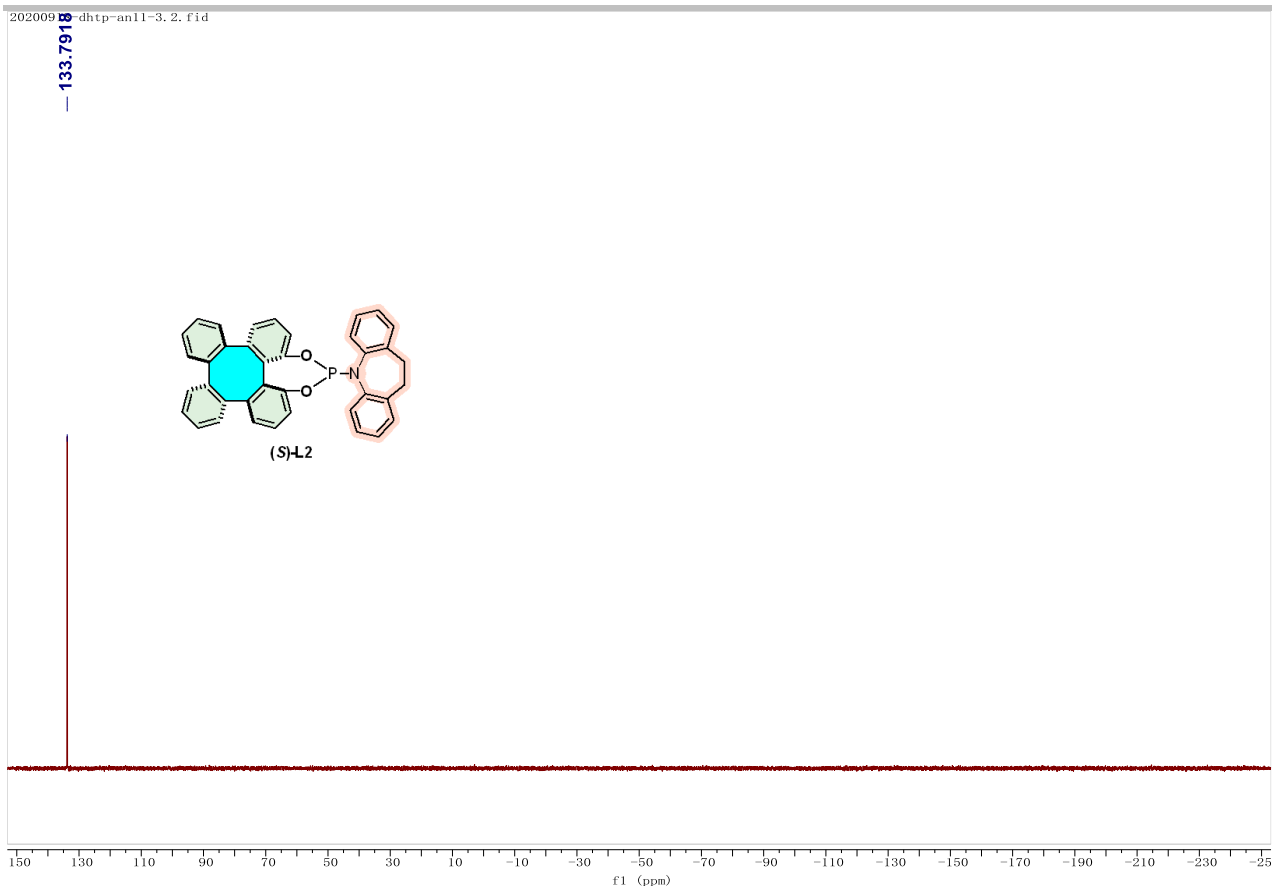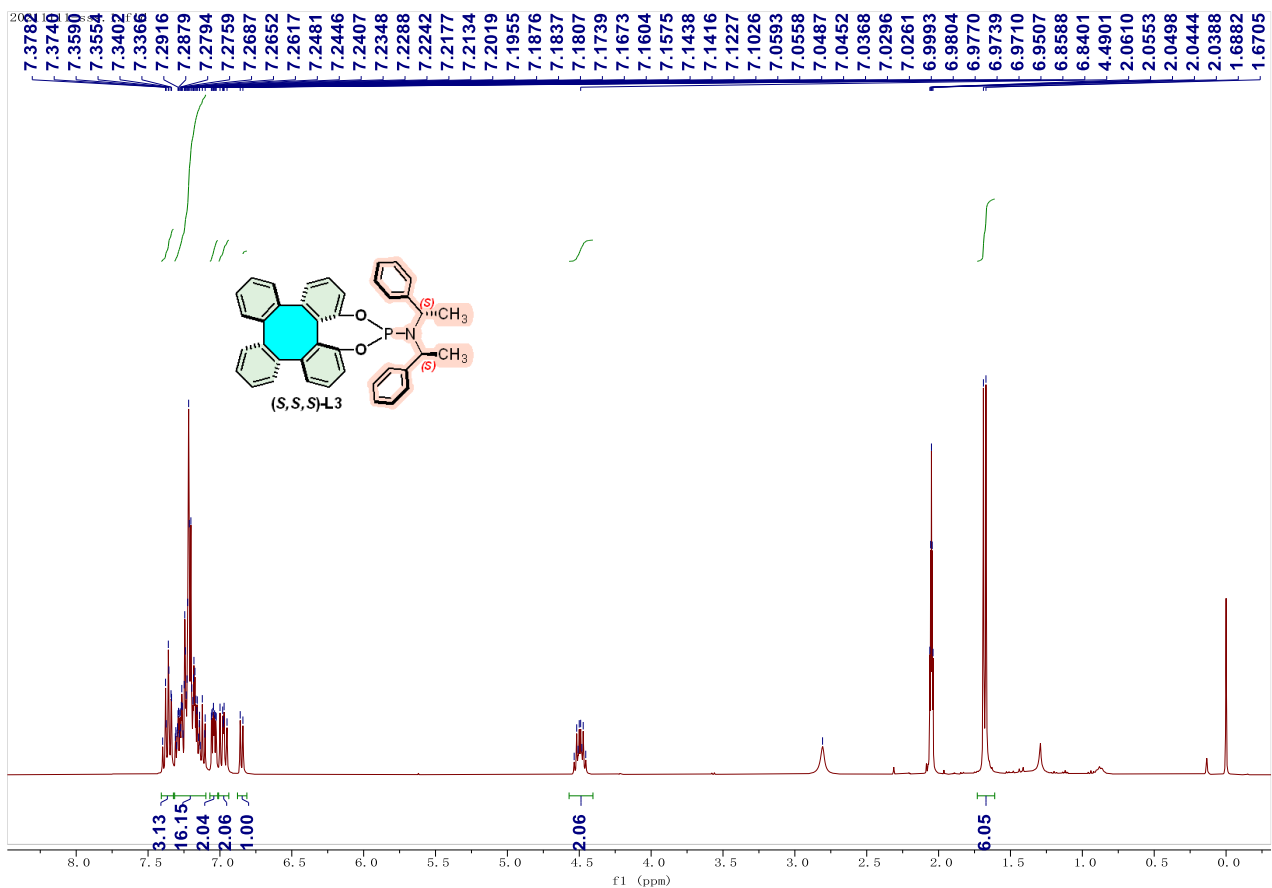

# SUPPORTING INFORMATION

20211205-SSS-4.16.fid

149.3293  
149.0692  
149.0125  
142.8775  
142.8669  
142.4652  
142.2984  
140.3467  
140.2053  
140.1759  
139.8118  
129.5650  
129.5338  
128.7472  
128.5486  
127.7156  
127.3946  
127.3825  
127.2216  
127.1173  
127.0435  
126.9921  
126.9745  
126.7626  
126.5307  
126.4671  
126.0302  
125.9622  
125.6611  
124.0834  
119.9211  
119.9034  
119.6937

53.7195  
53.6470

21.9771  
21.8974

-0.0021

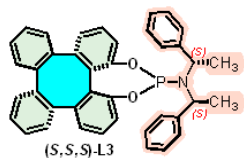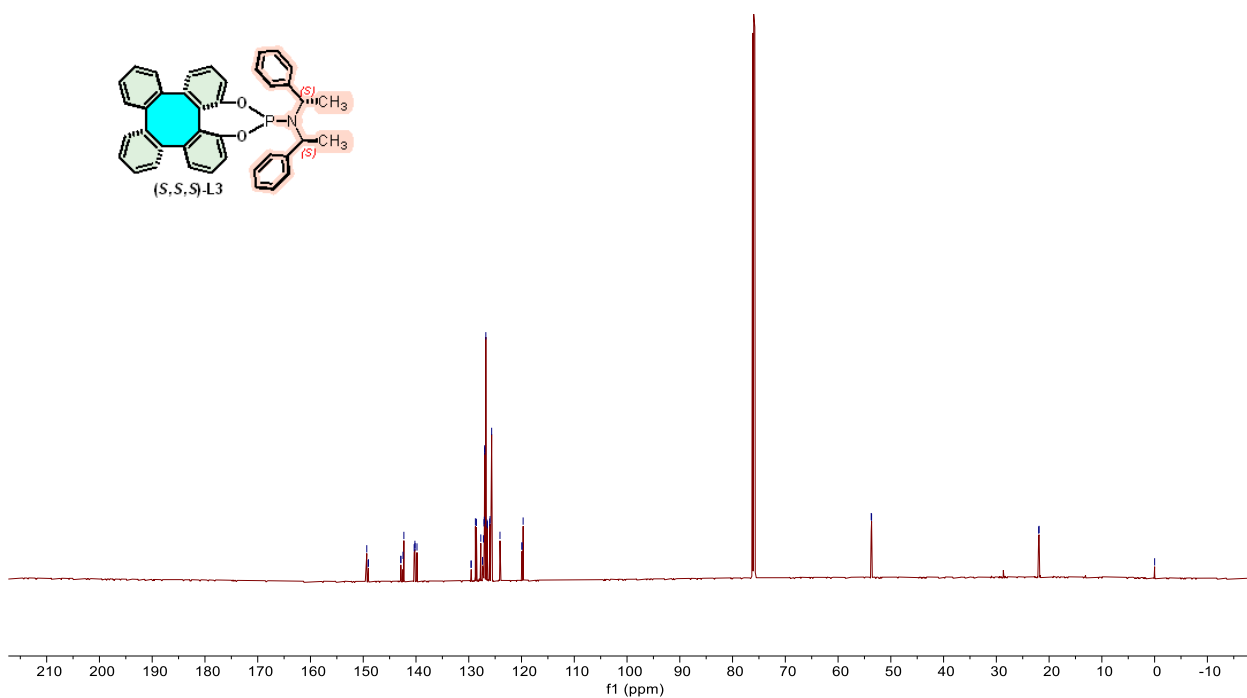

**$^{13}\text{C}$  NMR (150 MHz,  $\text{CDCl}_3$ ) spectrum of (S,S,S)-L3**

20211207-SSS.10.fid

128.7460  
128.5474  
127.7143  
127.2158  
127.1162  
127.0426  
126.9913  
126.9736  
126.7617  
126.5301  
126.4663  
126.0297  
125.9616  
125.6603  
124.0818  
119.9204  
119.9026  
119.6931

53.7194  
53.6471

21.9772  
21.8975

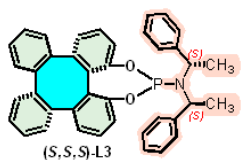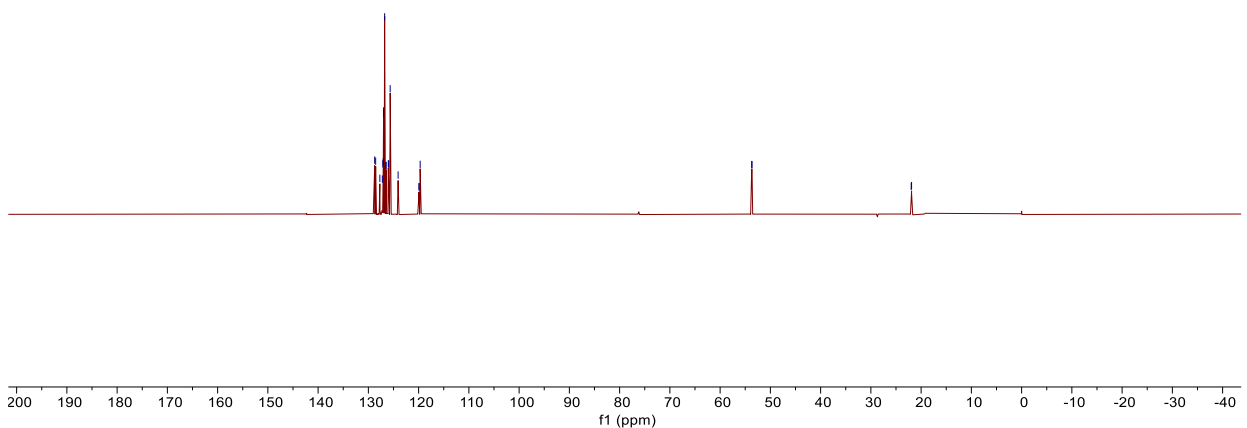

**DEPT135  $^{13}\text{C}$  NMR (150 MHz,  $\text{CDCl}_3$ ) spectrum of (S,S,S)-L3**

# SUPPORTING INFORMATION

20211205-SSS-15.fid

149.306

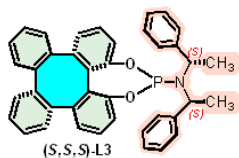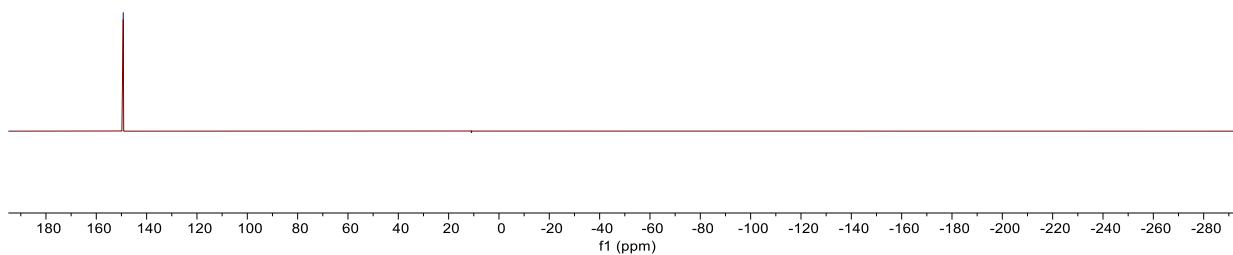

$^{31}\text{P}$  NMR (243 MHz,  $\text{CDCl}_3$ ) spectrum of (S,S,S)-L3

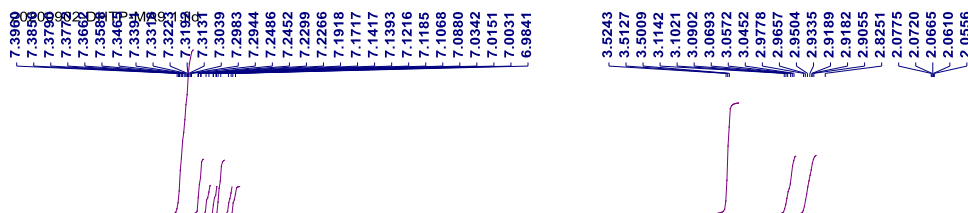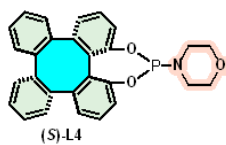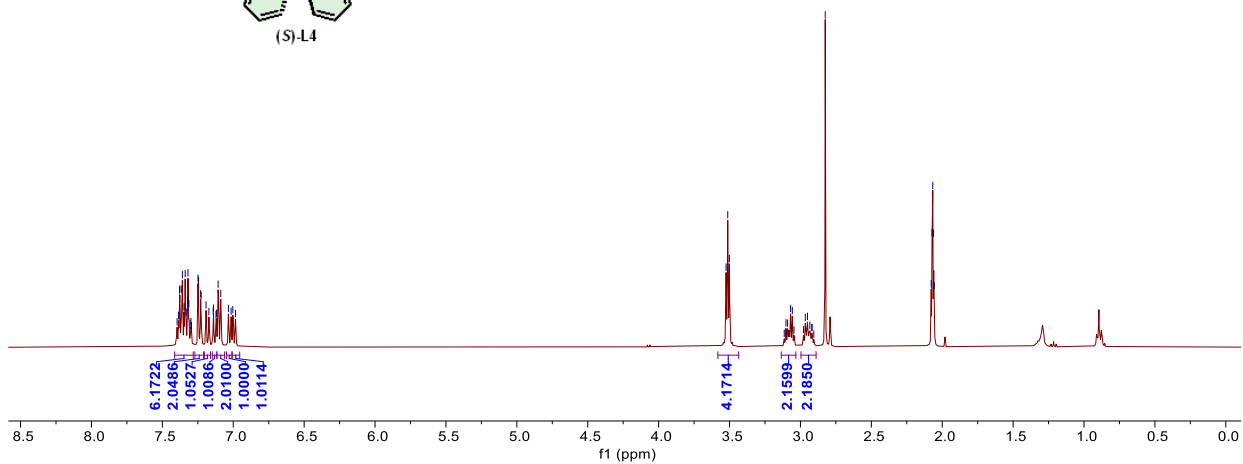

$^1\text{H}$  NMR (400 MHz,  $\text{Acetone-}d_6$ ) spectrum of (S)-L4

# SUPPORTING INFORMATION

20200902-DHTP-MA9.2.fid

141.9863

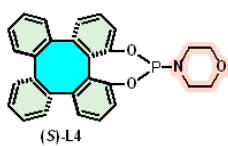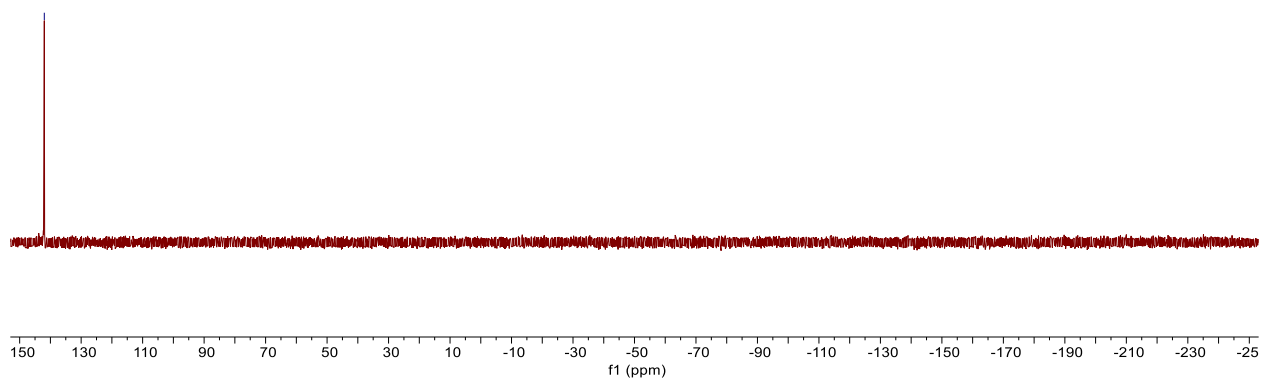

$^{31}\text{P}$  NMR (162 MHz, Acetone- $d_6$ ) spectrum of (S)-L4

20200905-DHTP-mA-c3.1.fid

150.0290  
149.6344  
149.5909  
143.9690  
143.9525  
143.6369  
141.2071  
141.1422  
140.9210  
140.6734  
130.4016  
130.3595  
129.5470  
129.4071  
129.3896  
129.0896  
129.0653  
128.4924  
128.4701  
127.8282  
127.7973  
127.3792  
127.3306  
126.5640  
126.5532  
125.6353  
120.6434  
120.4798  
120.4580  
67.4803  
67.4293  
44.4492  
44.2703

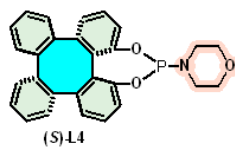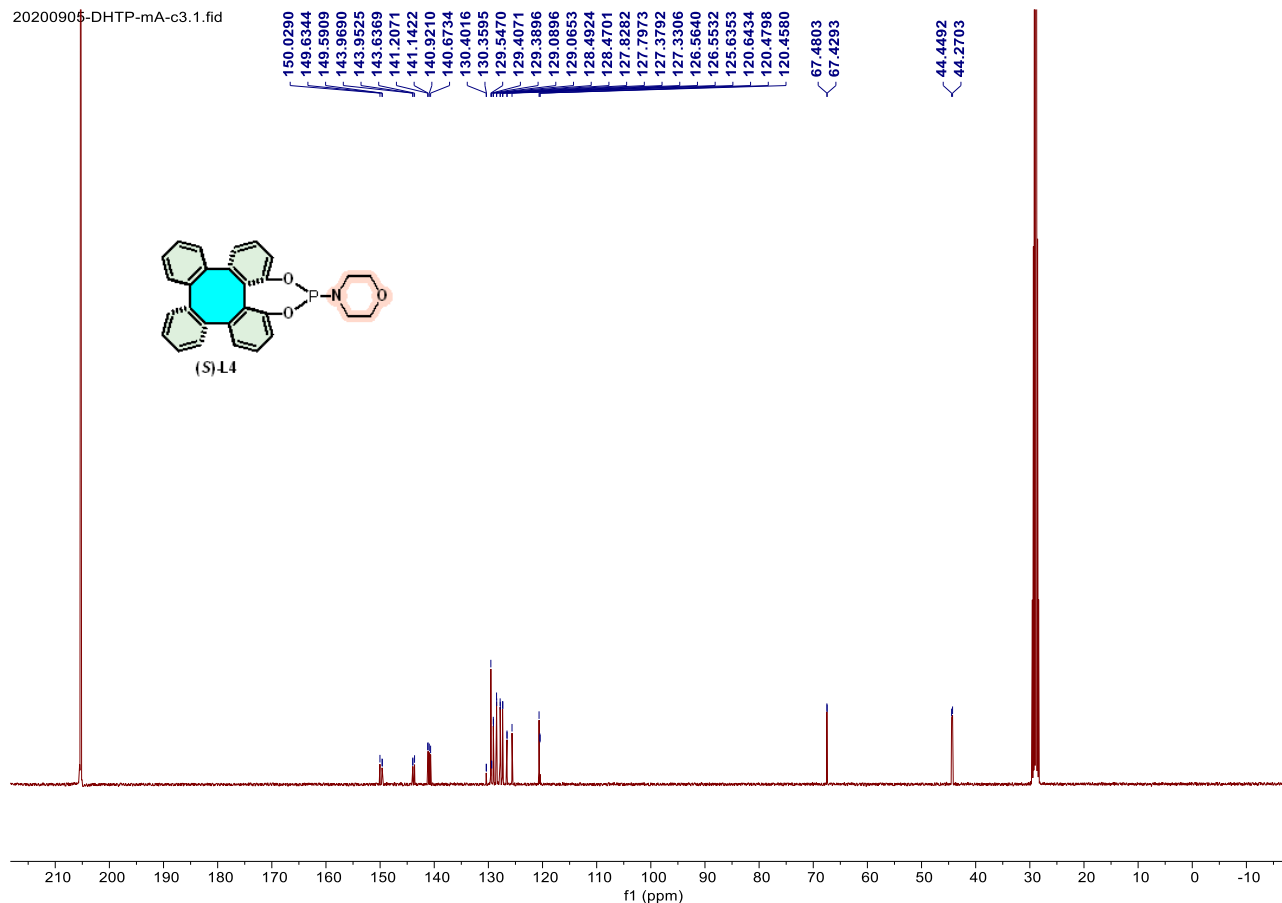

$^{13}\text{C}$  NMR (150 MHz, Acetone- $d_6$ ) spectrum of (S)-L4

# SUPPORTING INFORMATION

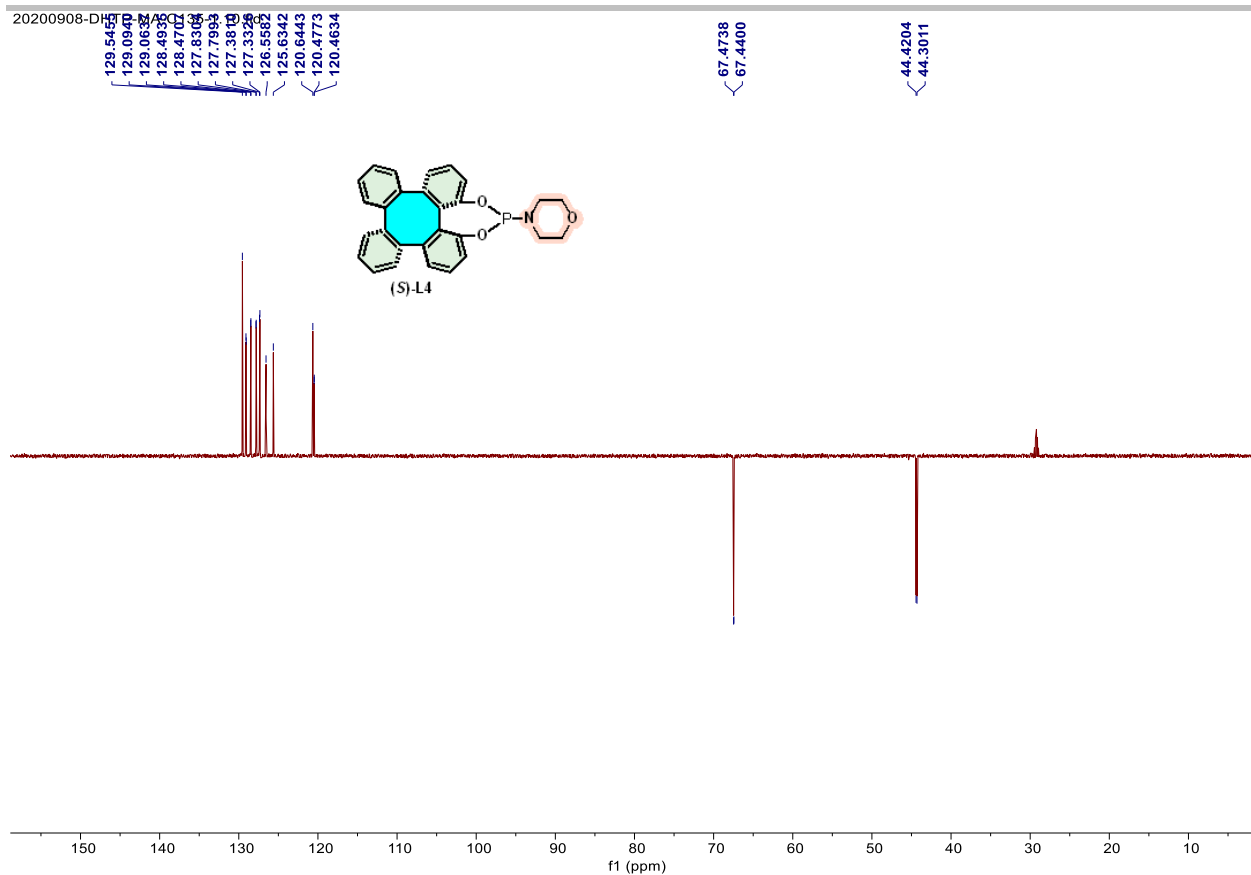

DEPT135  $^{13}\text{C}$  NMR (150 MHz, Acetone- $d_6$ ) spectrum of (S)-L4

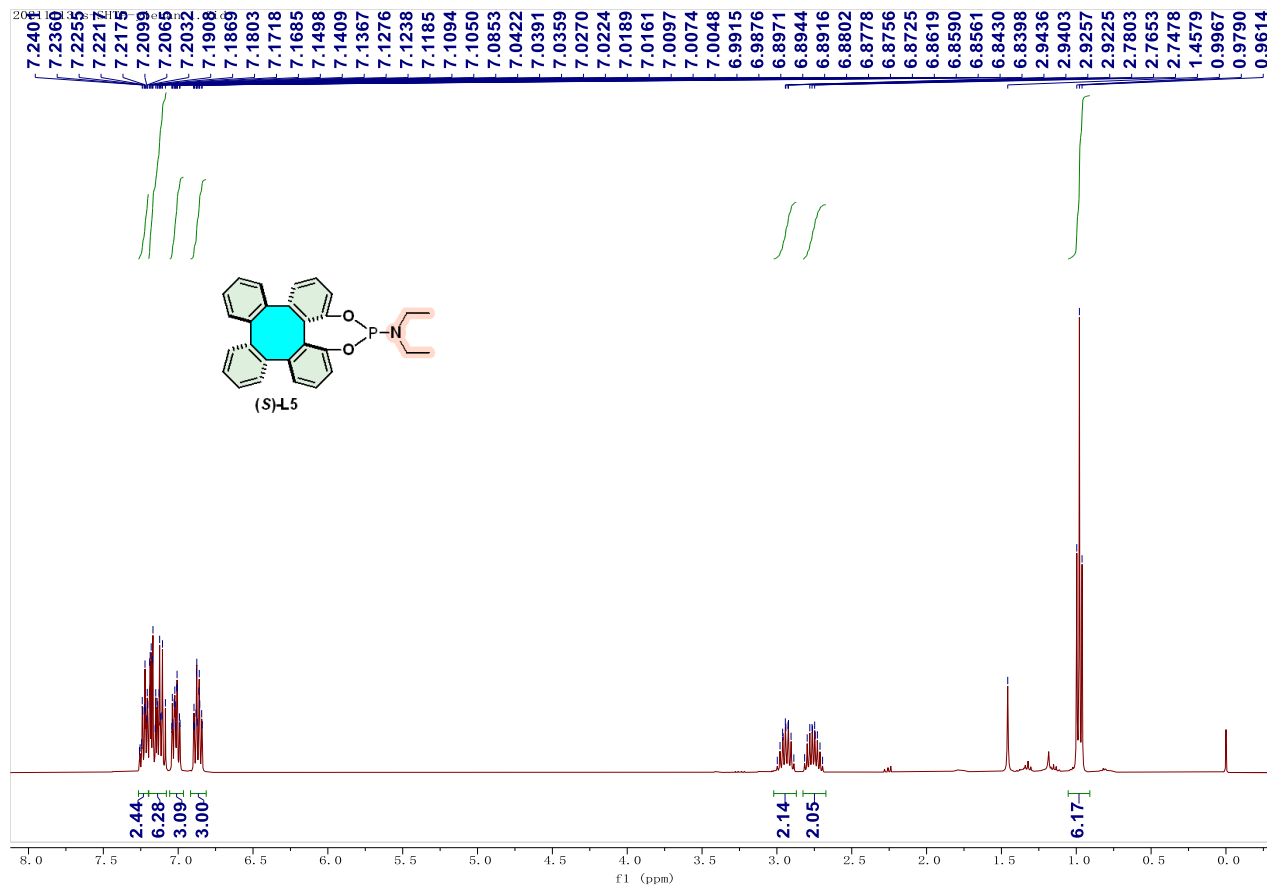

$^1\text{H}$  NMR (400 MHz,  $\text{CDCl}_3$ ) spectrum of (S)-L5

# SUPPORTING INFORMATION

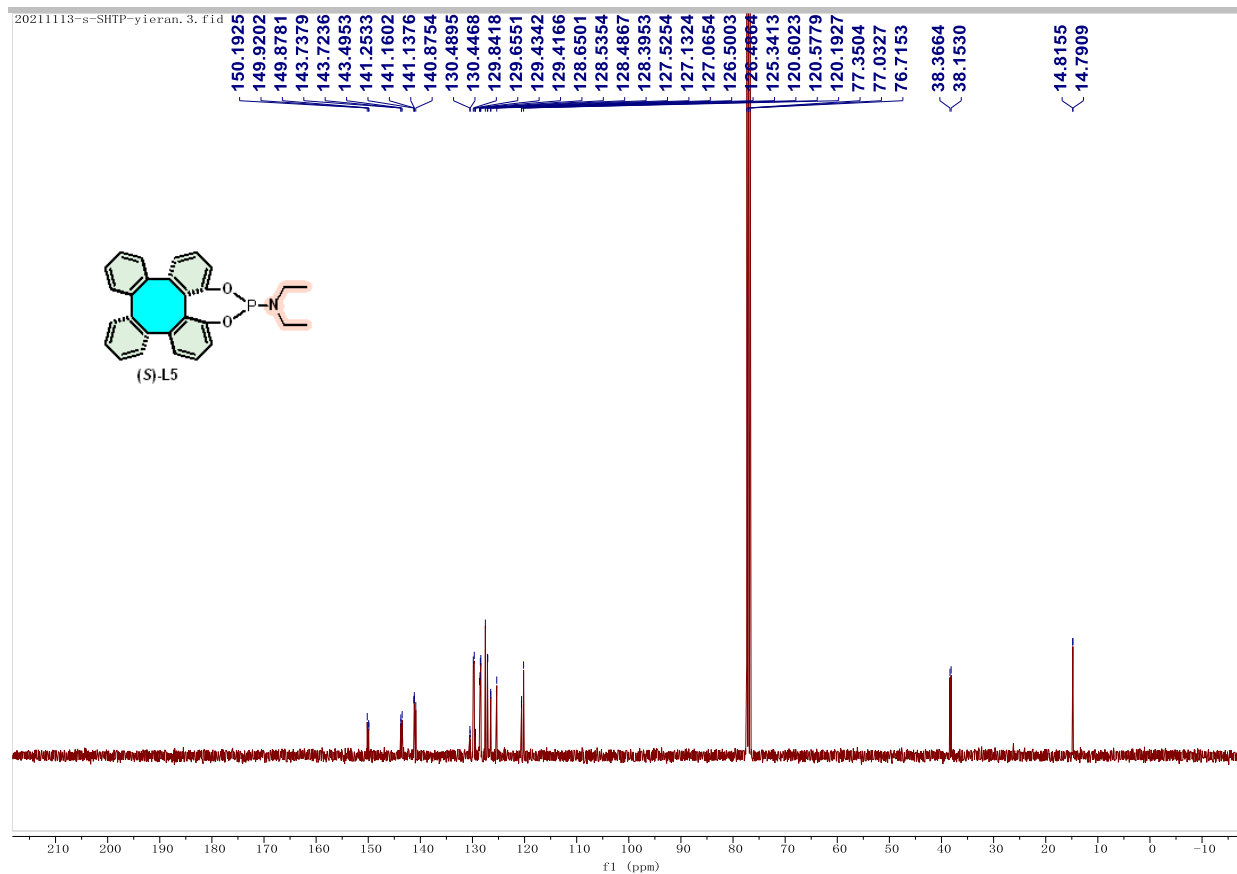

$^{13}\text{C}$  NMR (100 MHz,  $\text{CDCl}_3$ ) spectrum of (S)-L5

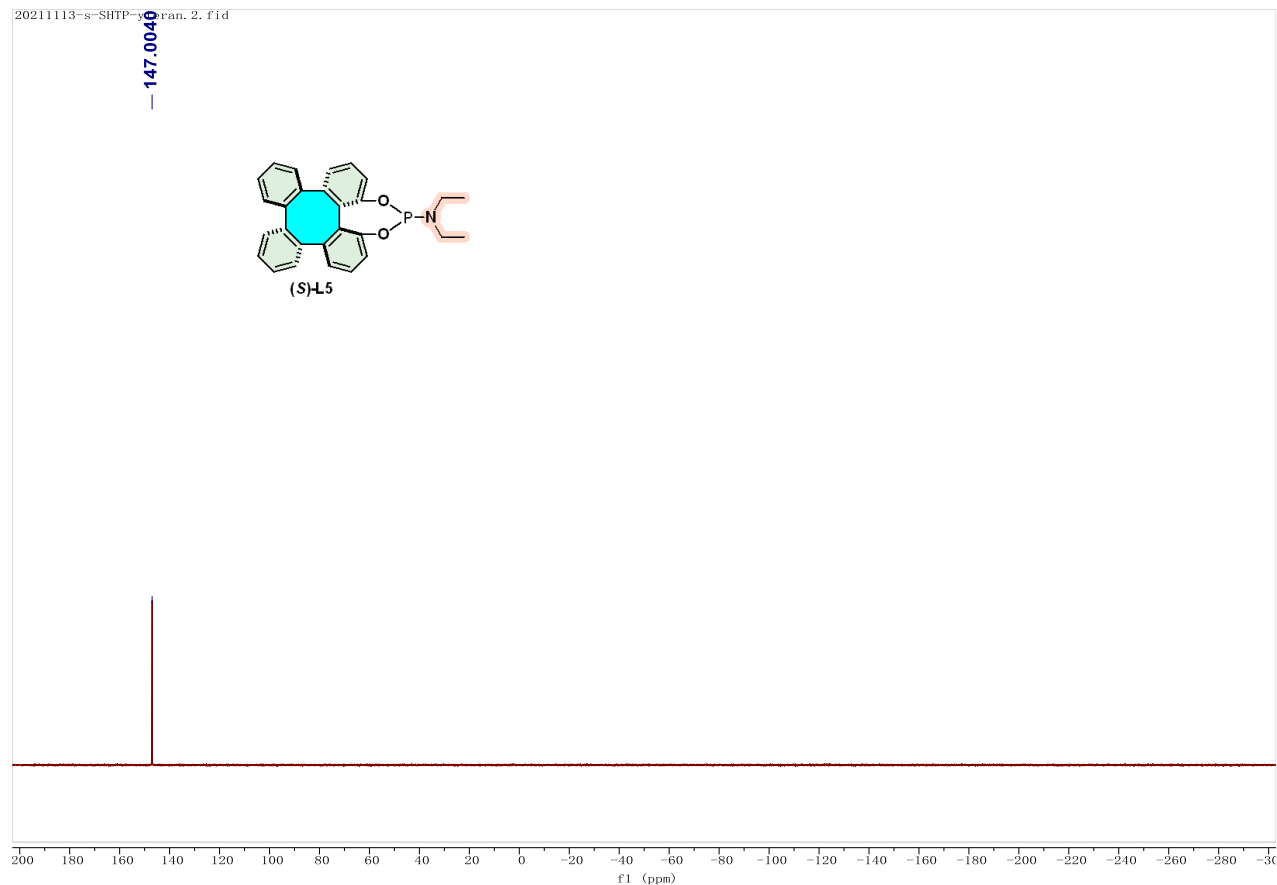

$^{31}\text{P}$  NMR (162 MHz,  $\text{CDCl}_3$ ) spectrum of (S)-L5

# SUPPORTING INFORMATION

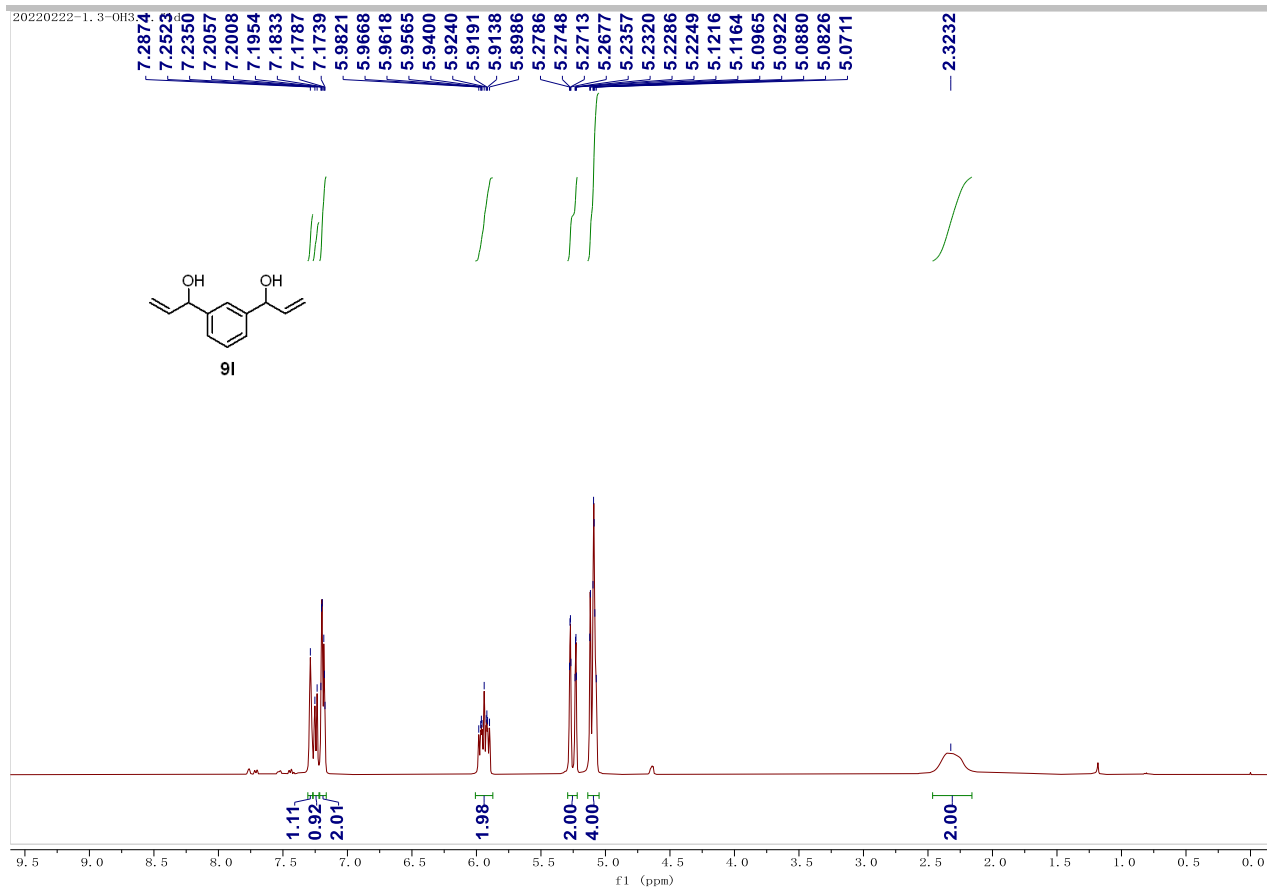

<sup>1</sup>H NMR (400 MHz, CDCl<sub>3</sub>) spectrum of **9I**

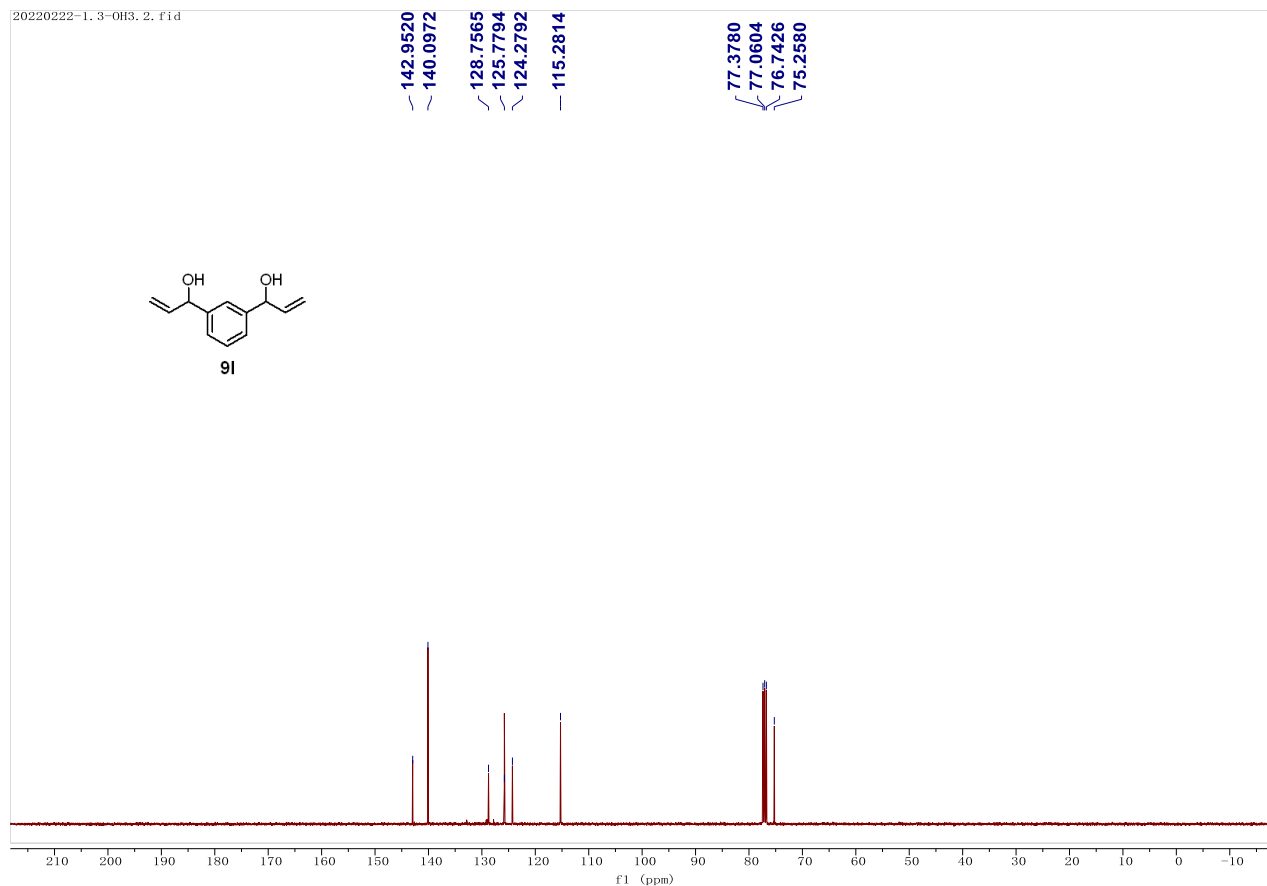

<sup>13</sup>C NMR (100 MHz, CDCl<sub>3</sub>) spectrum of **9I**



# SUPPORTING INFORMATION

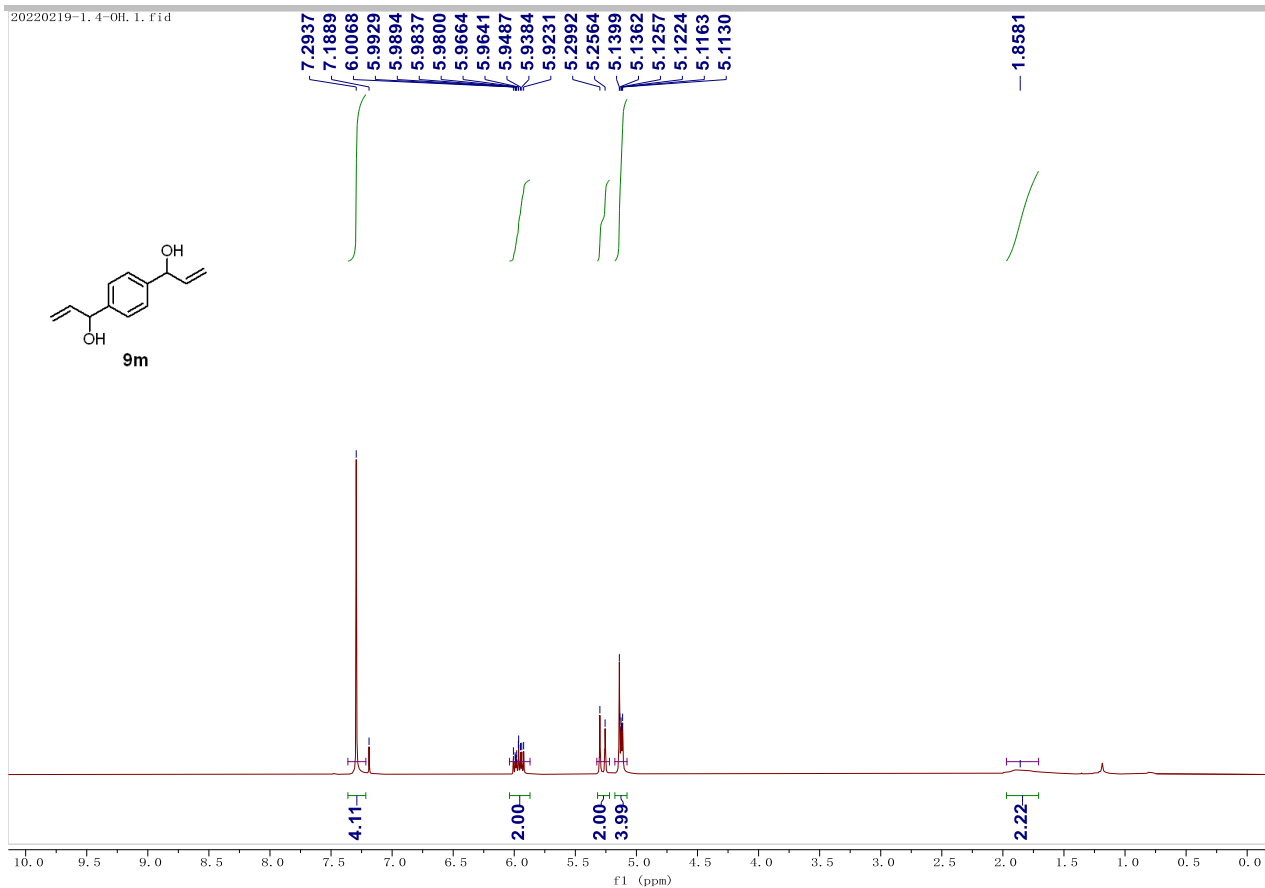

$^1\text{H}$  NMR (400 MHz,  $\text{CDCl}_3$ ) spectrum of **9m**

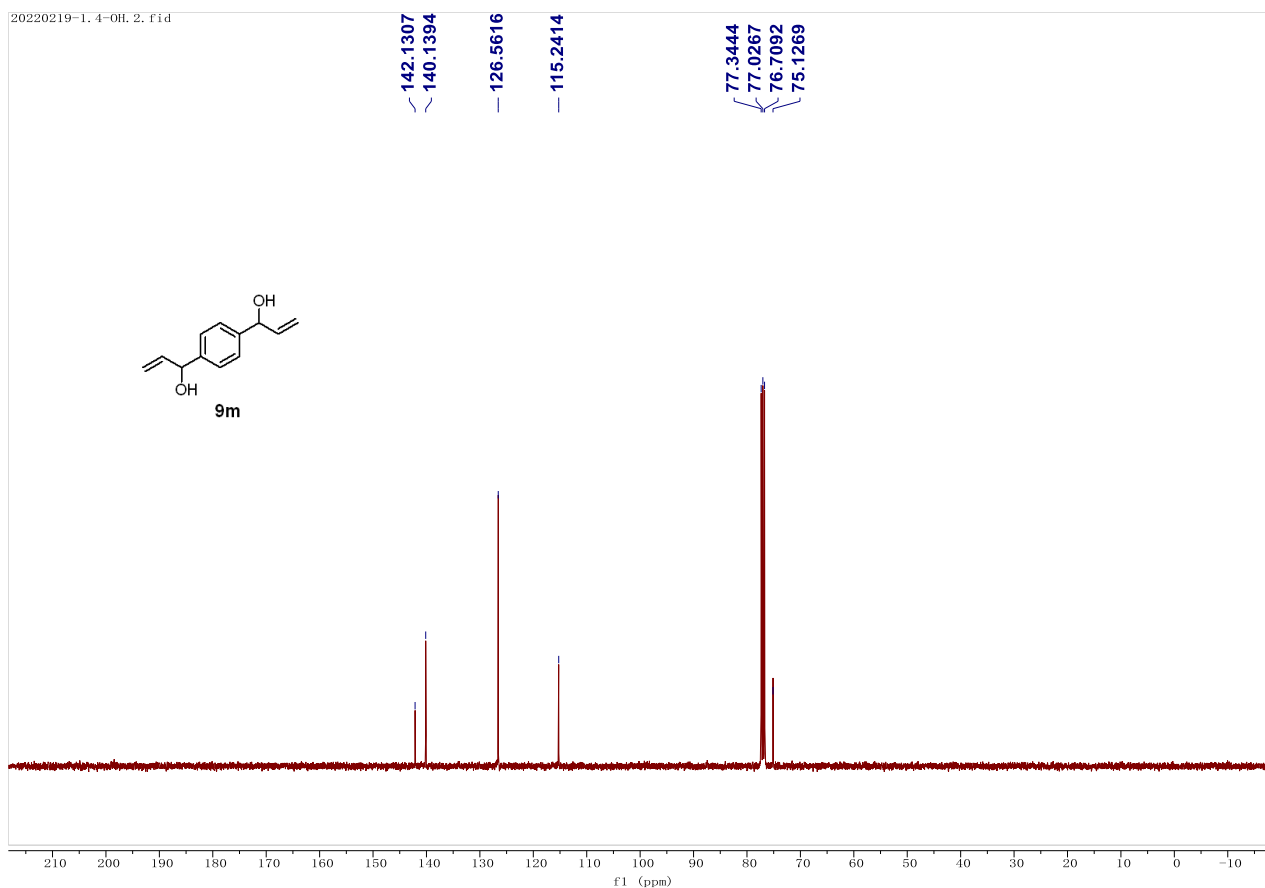

$^{13}\text{C}$  NMR (100 MHz,  $\text{CDCl}_3$ ) spectrum of **9m**

# SUPPORTING INFORMATION

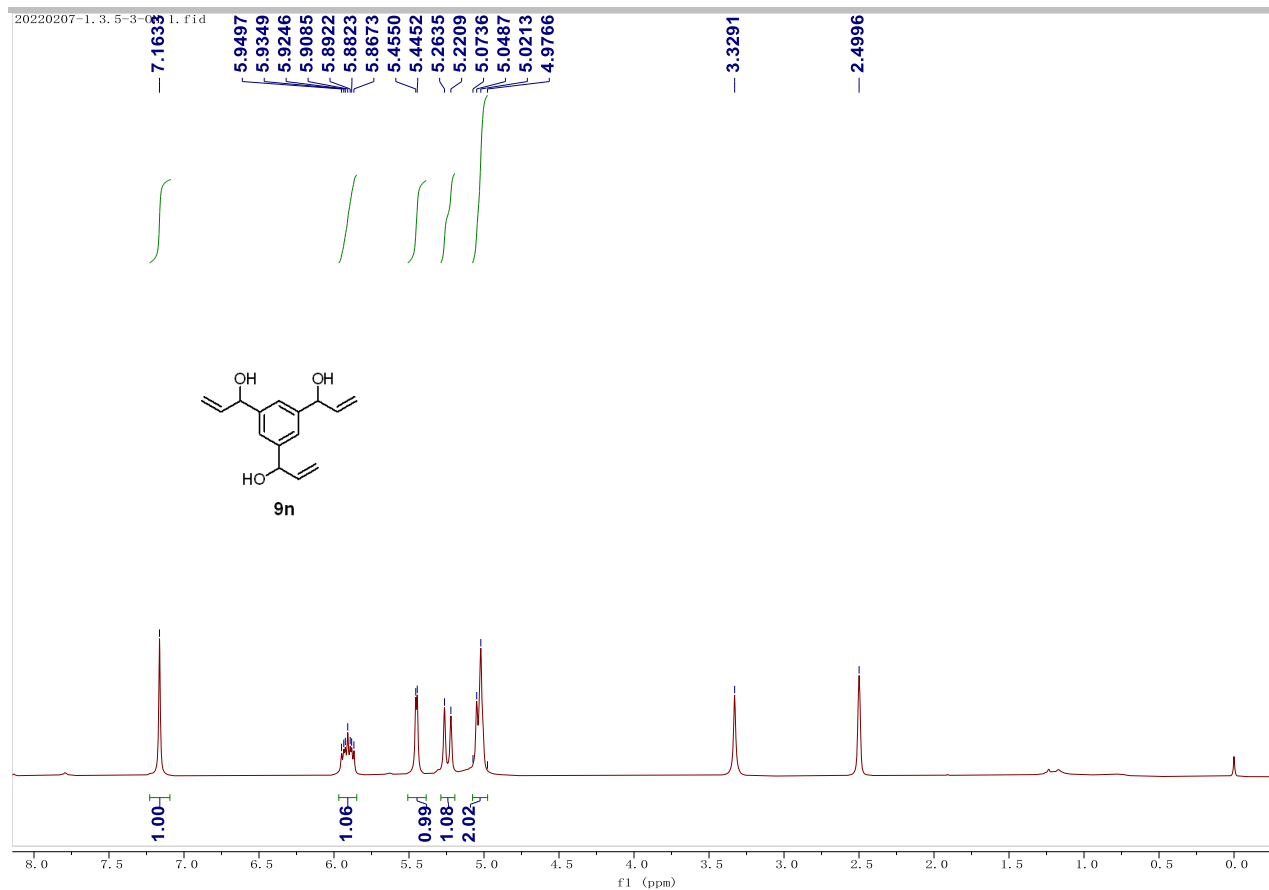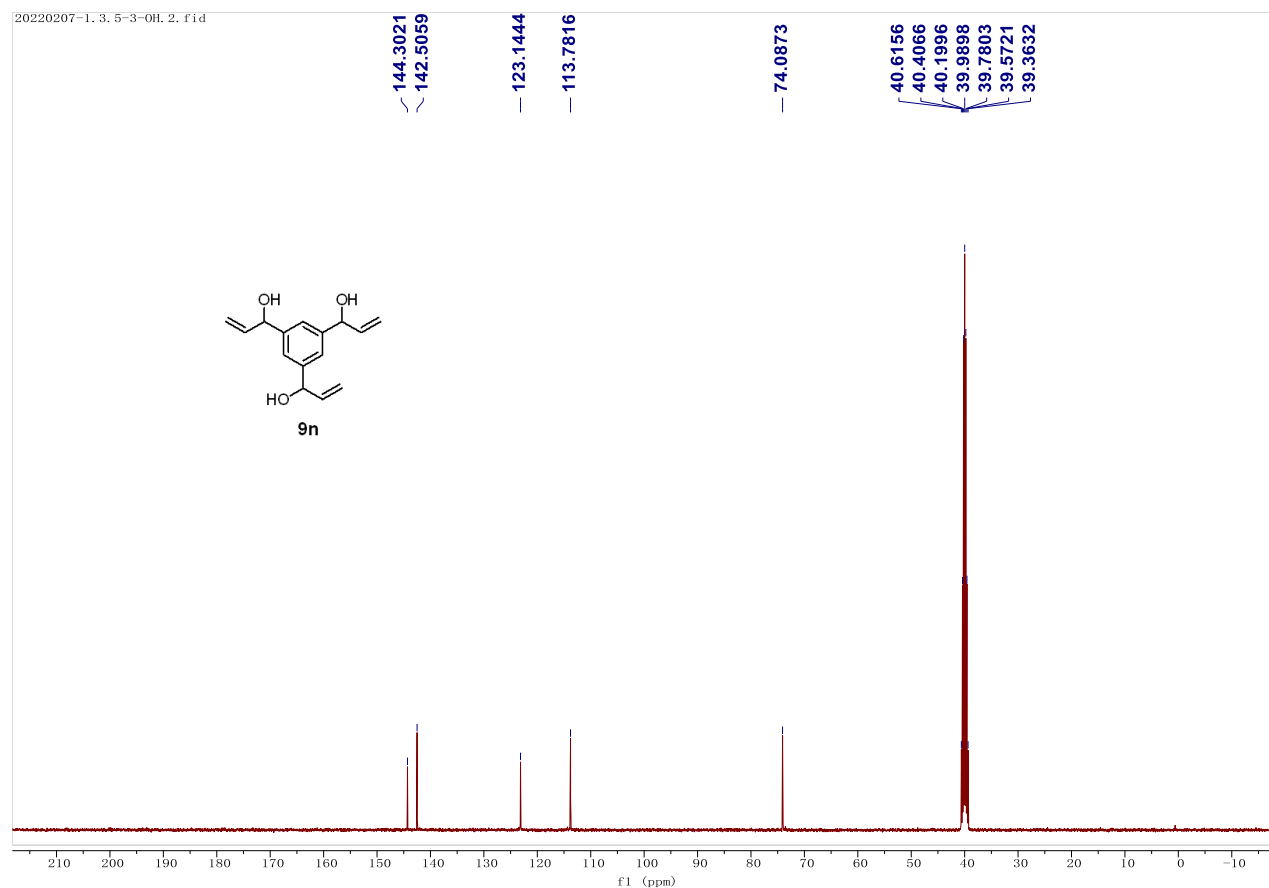

<sup>13</sup>C NMR (100 MHz, DMSO-*d*<sub>6</sub>) spectrum of **9n**

# SUPPORTING INFORMATION

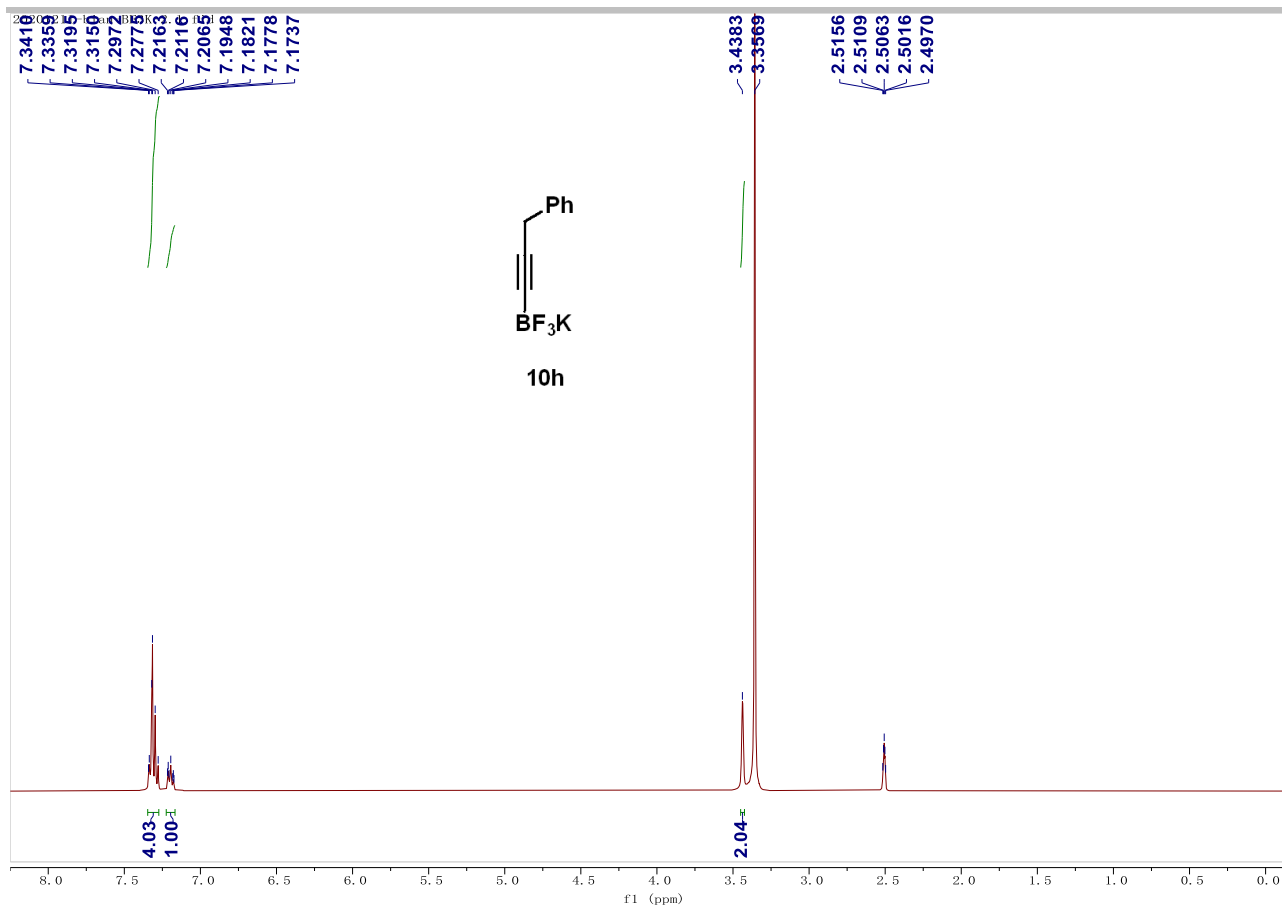

<sup>1</sup>H NMR (400 MHz, DMSO-*d*<sub>6</sub>) spectrum of **10h**

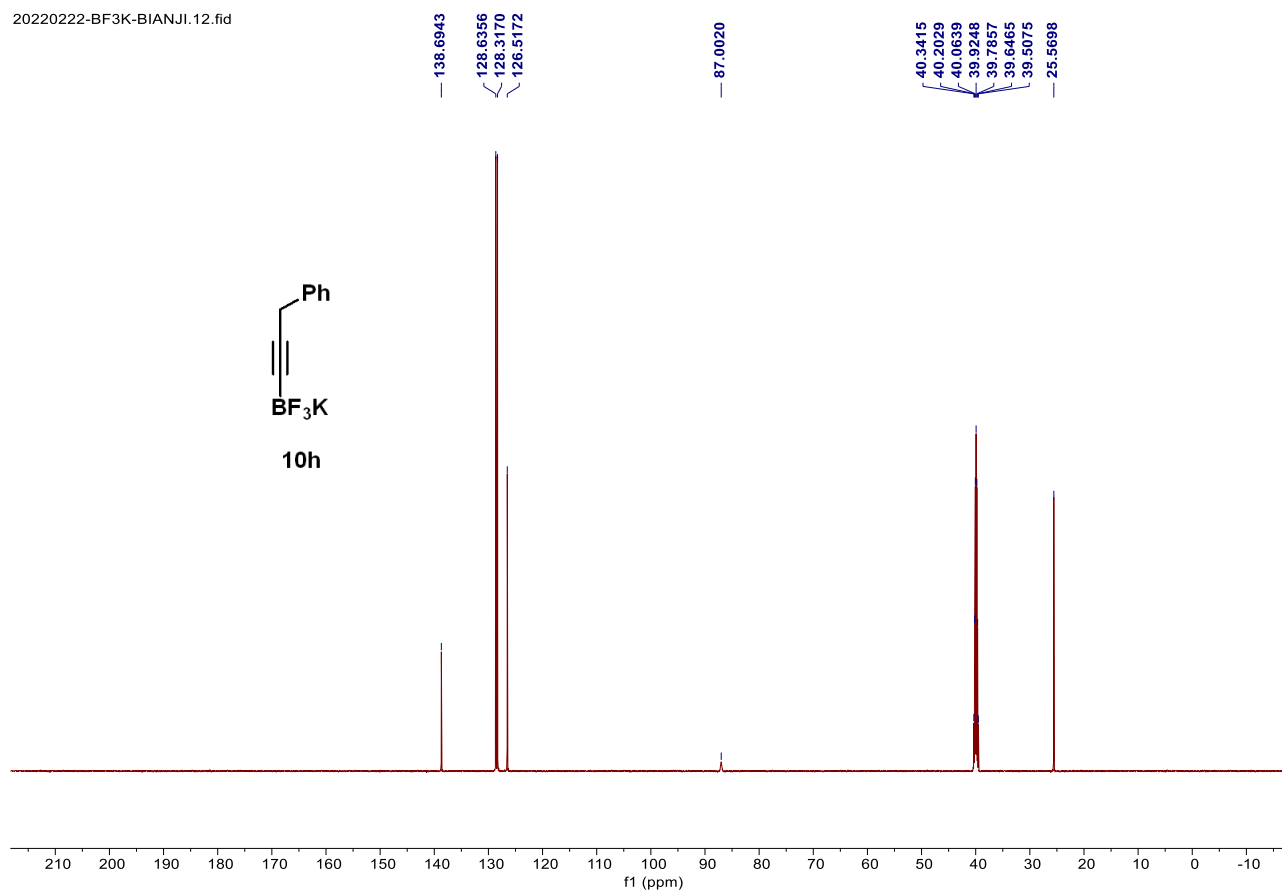

<sup>13</sup>C NMR (150 MHz, DMSO-*d*<sub>6</sub>) spectrum of **10h**

# SUPPORTING INFORMATION

20220222-BF3K-BIANJI.11.fid

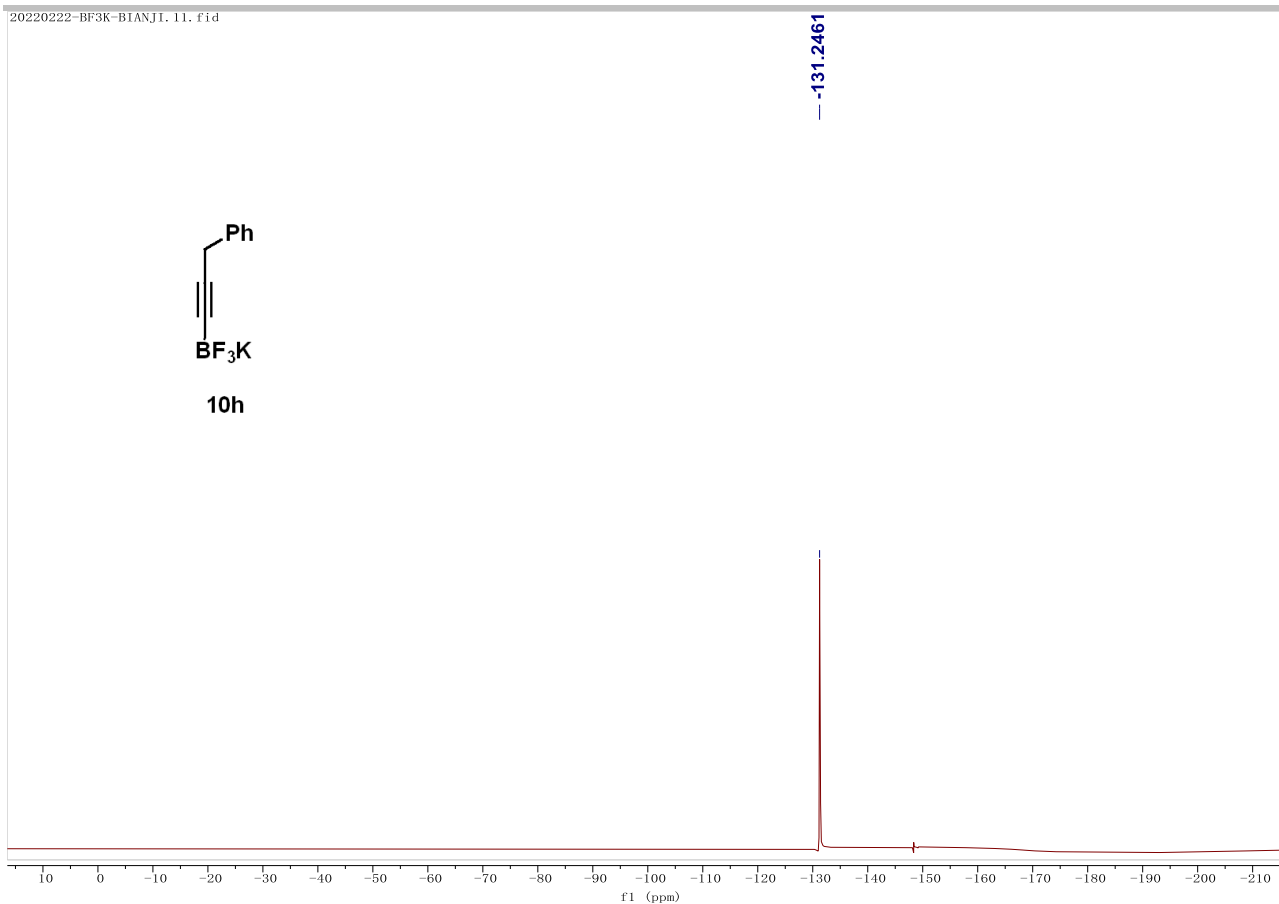

**<sup>19</sup>F NMR (565 MHz, DMSO-*d*<sub>6</sub>) spectrum of 10h**

# SUPPORTING INFORMATION

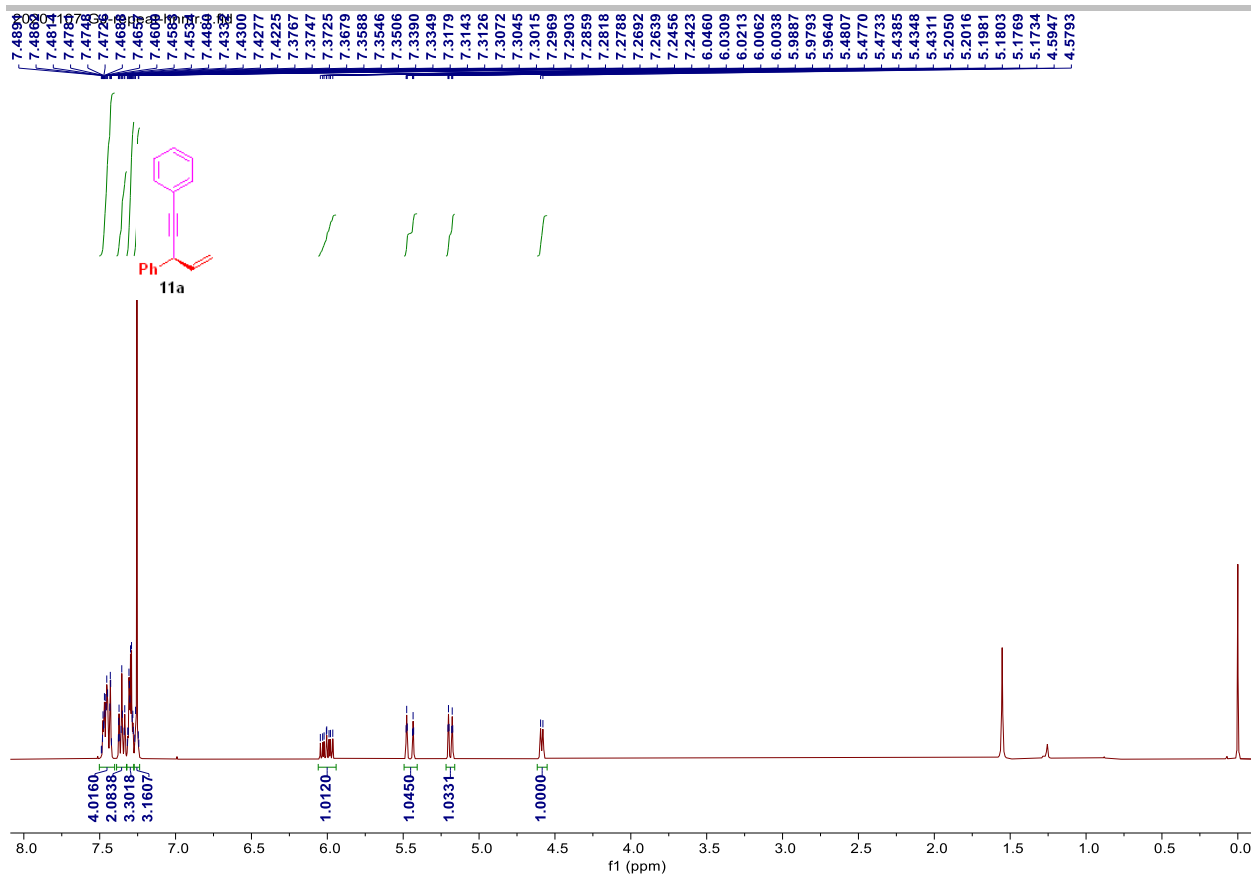

<sup>1</sup>H NMR (400 MHz, CDCl<sub>3</sub>) spectrum of **11a**

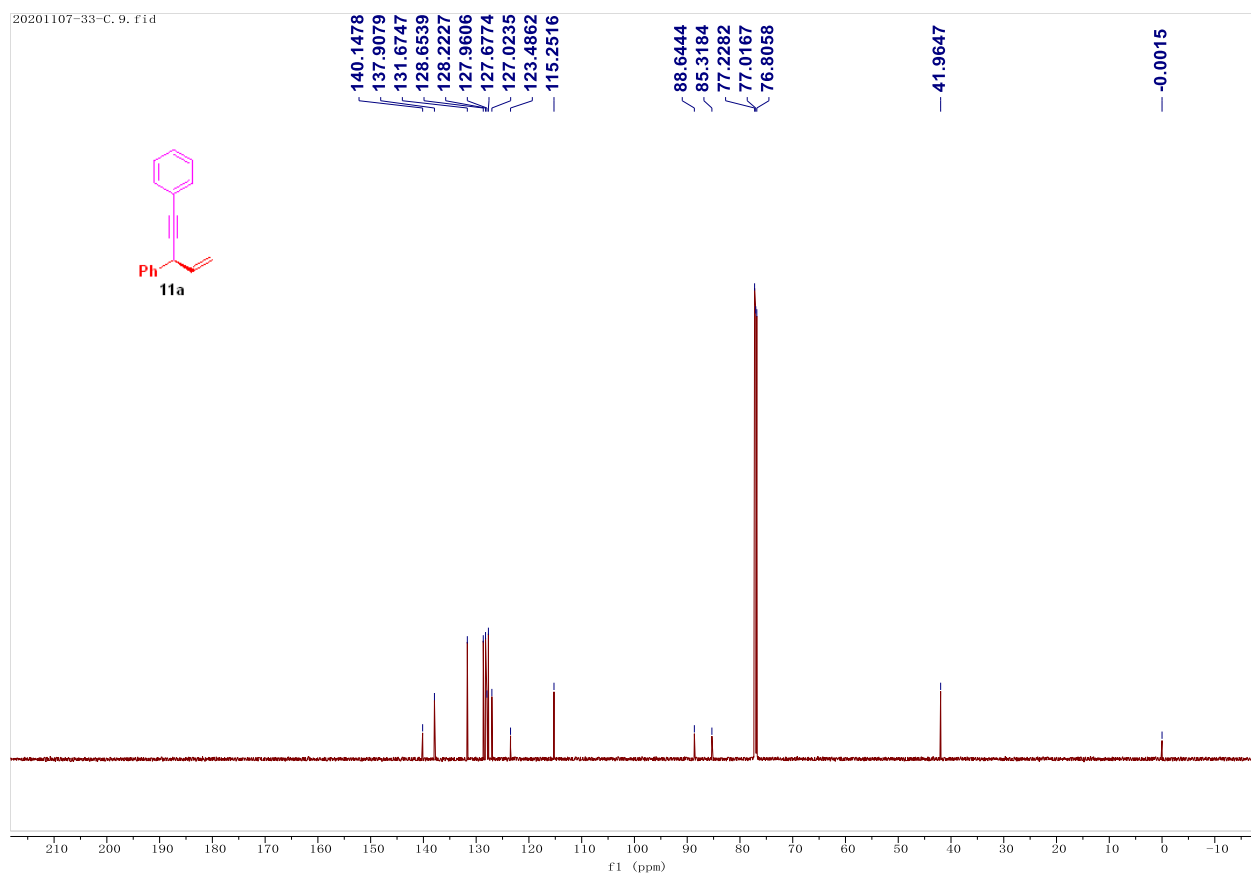

<sup>13</sup>C NMR (150 MHz, CDCl<sub>3</sub>) spectrum of **11a**

# SUPPORTING INFORMATION

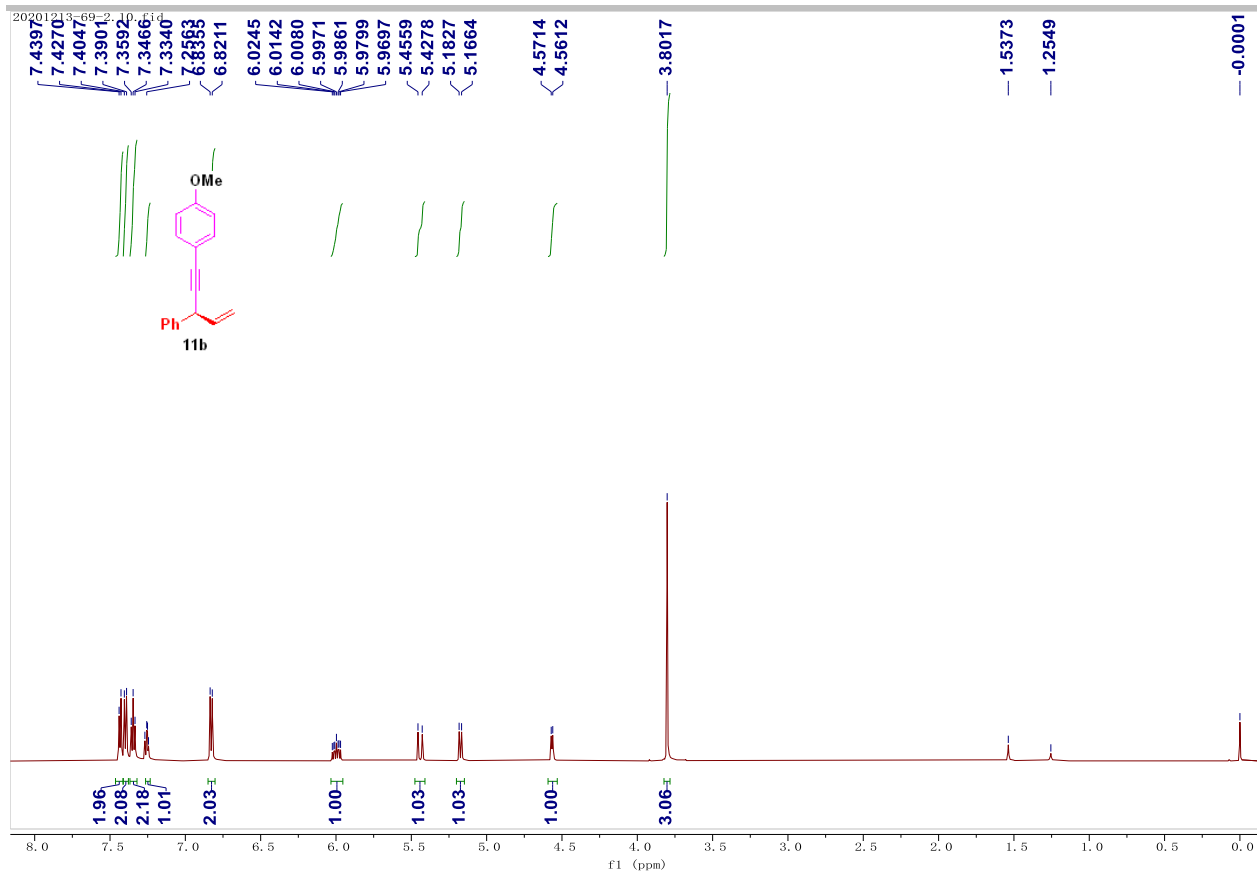

<sup>1</sup>H NMR (600 MHz, CDCl<sub>3</sub>) spectrum of **11b**

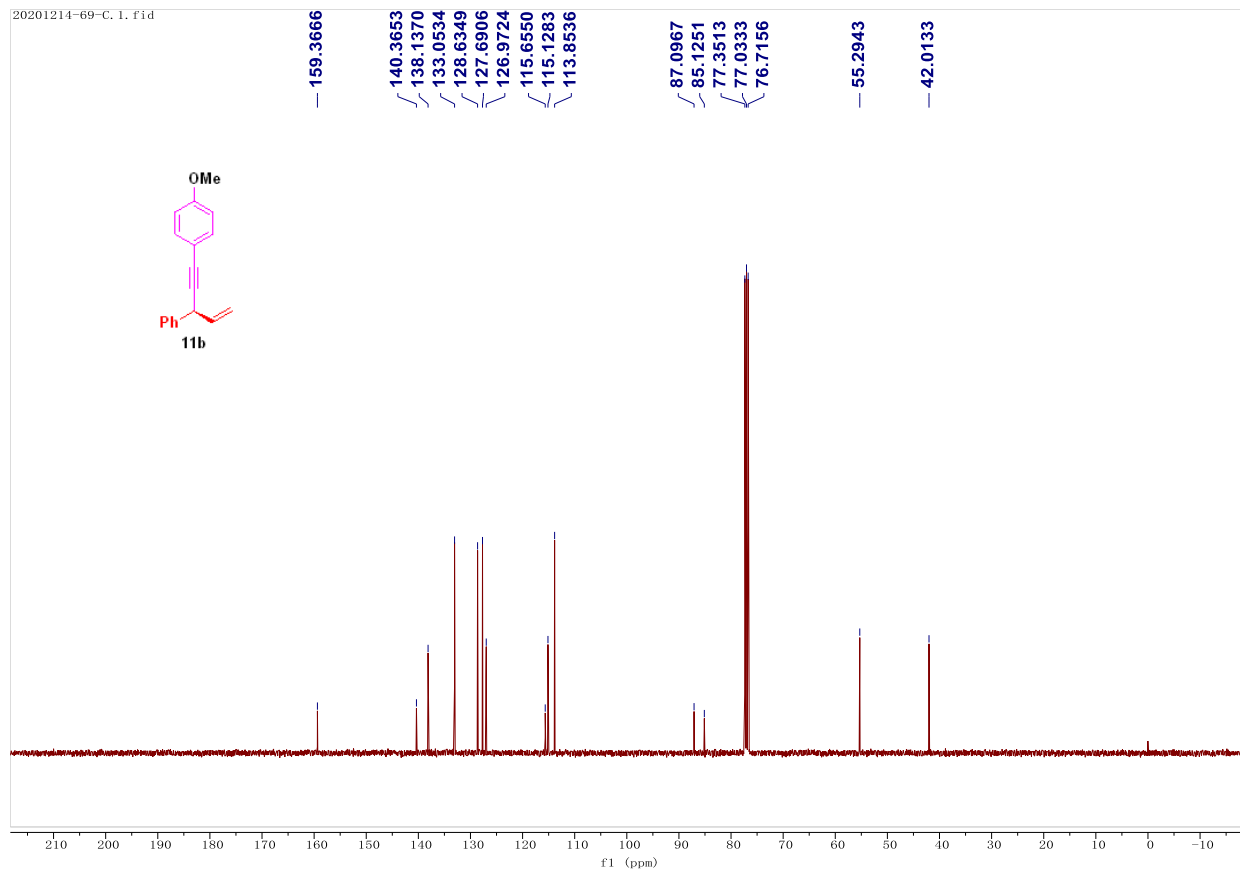

<sup>13</sup>C NMR (100 MHz, CDCl<sub>3</sub>) spectrum of **11b**

# SUPPORTING INFORMATION

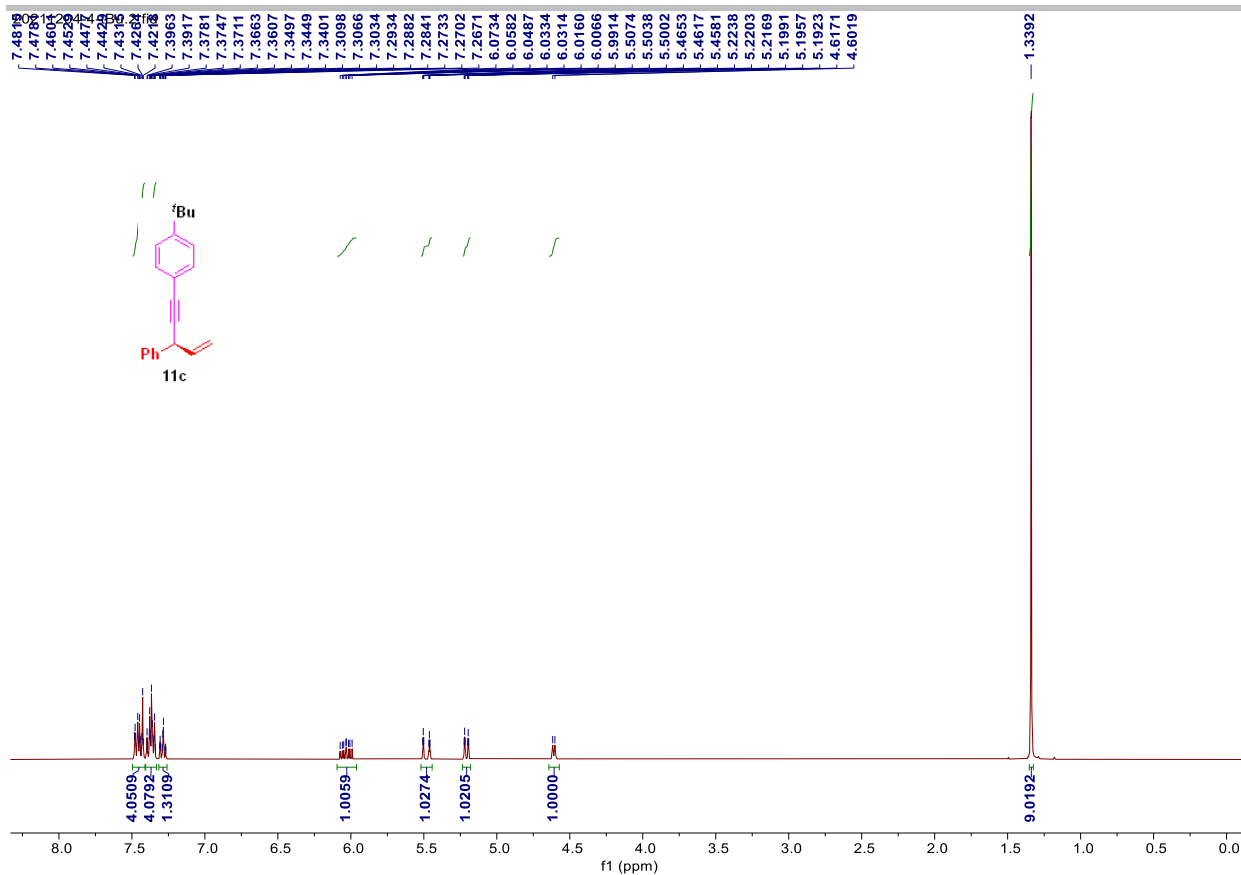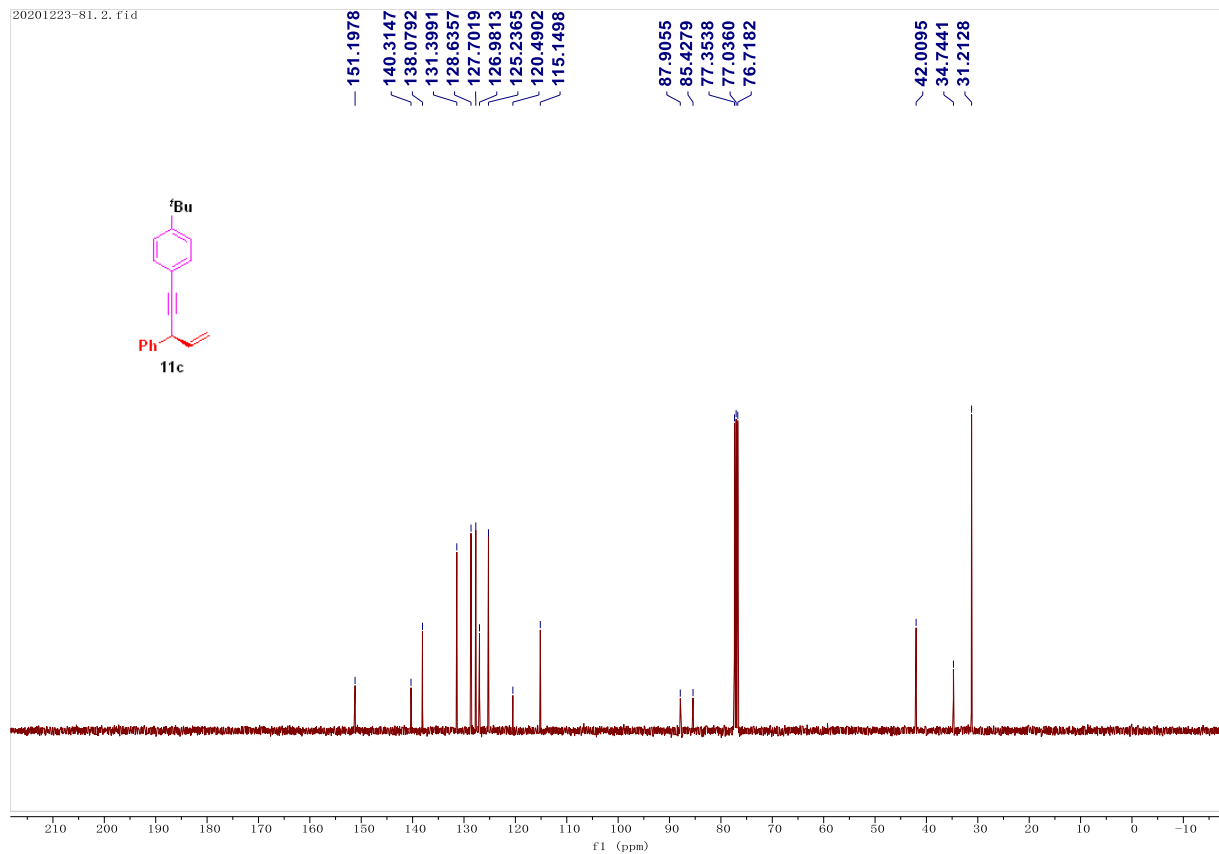

# SUPPORTING INFORMATION

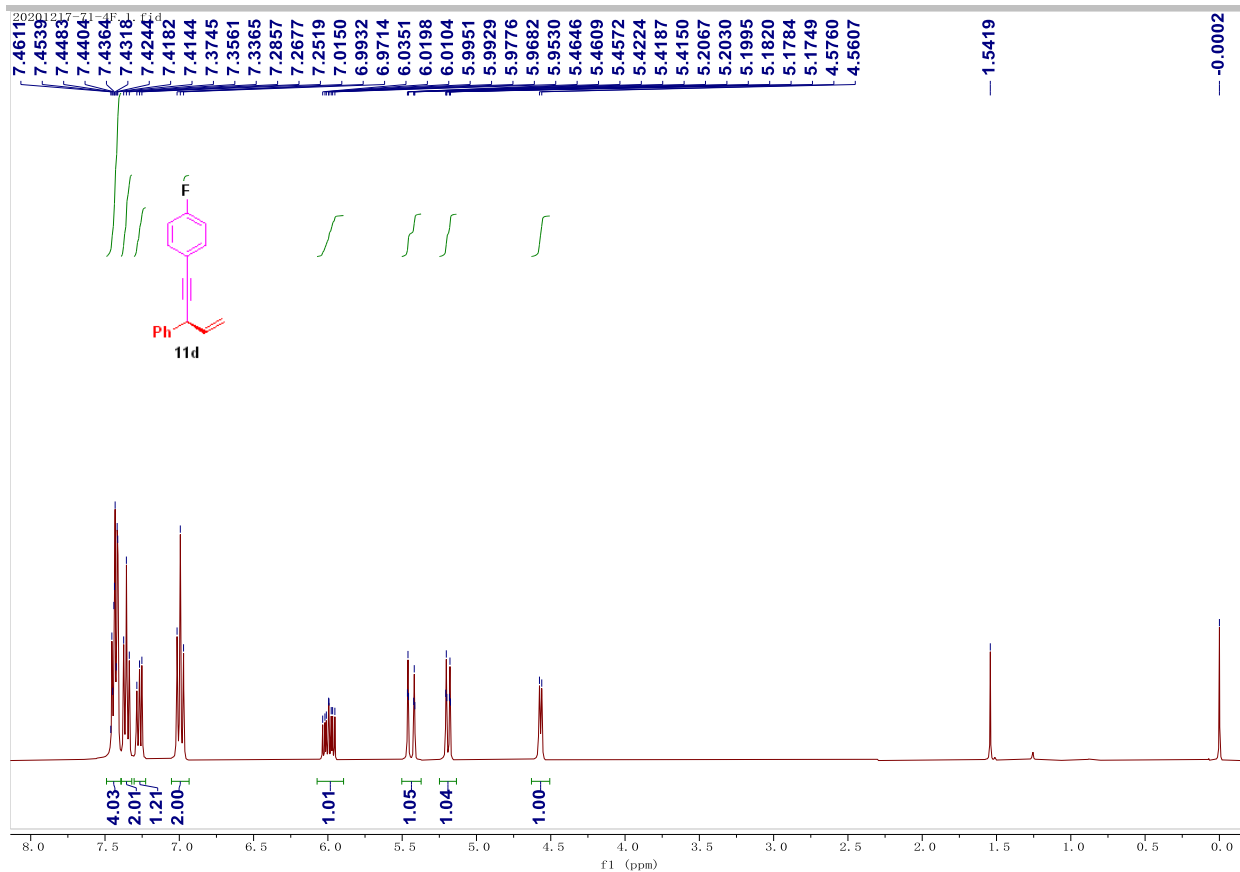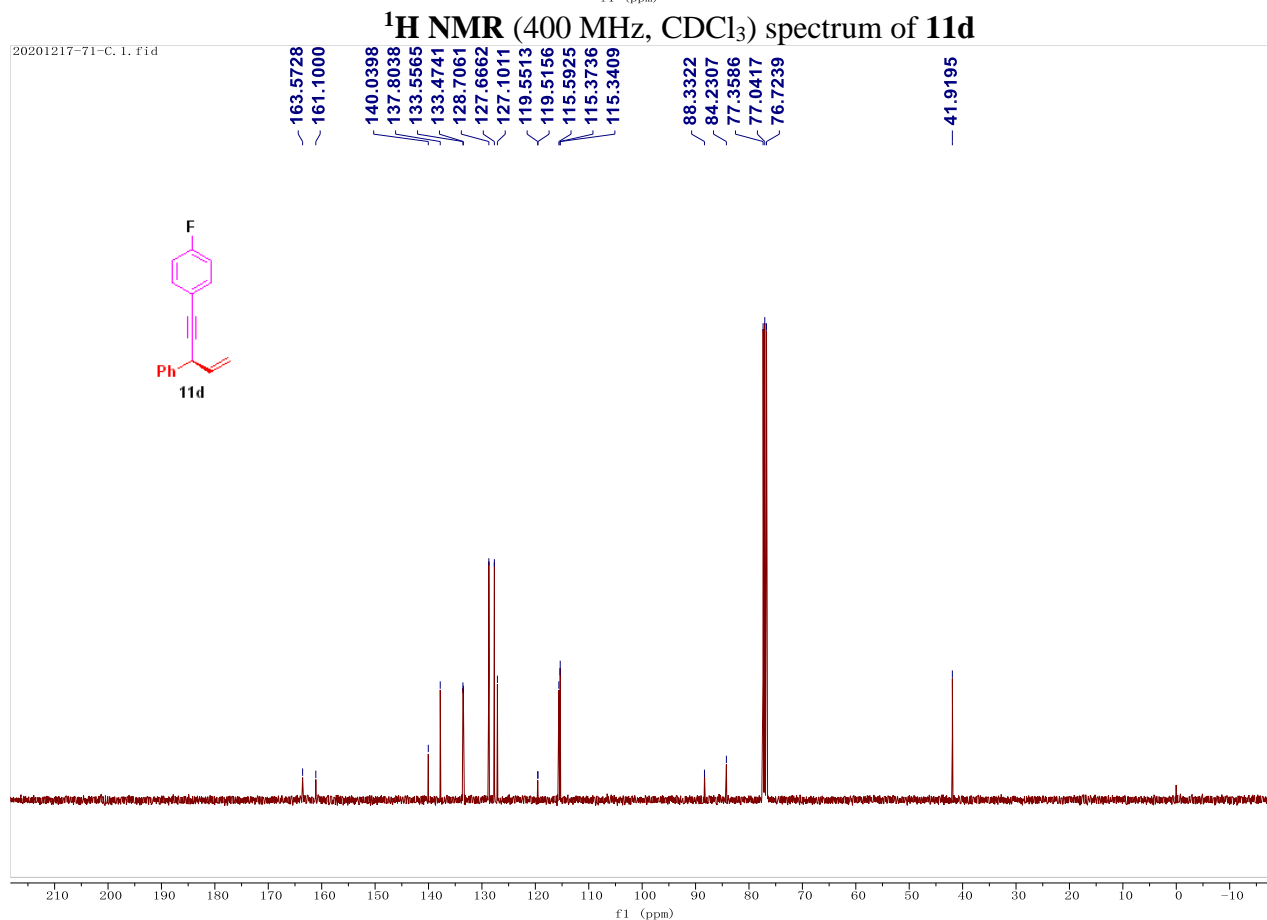



# SUPPORTING INFORMATION

20201217-71-4F.2.fid

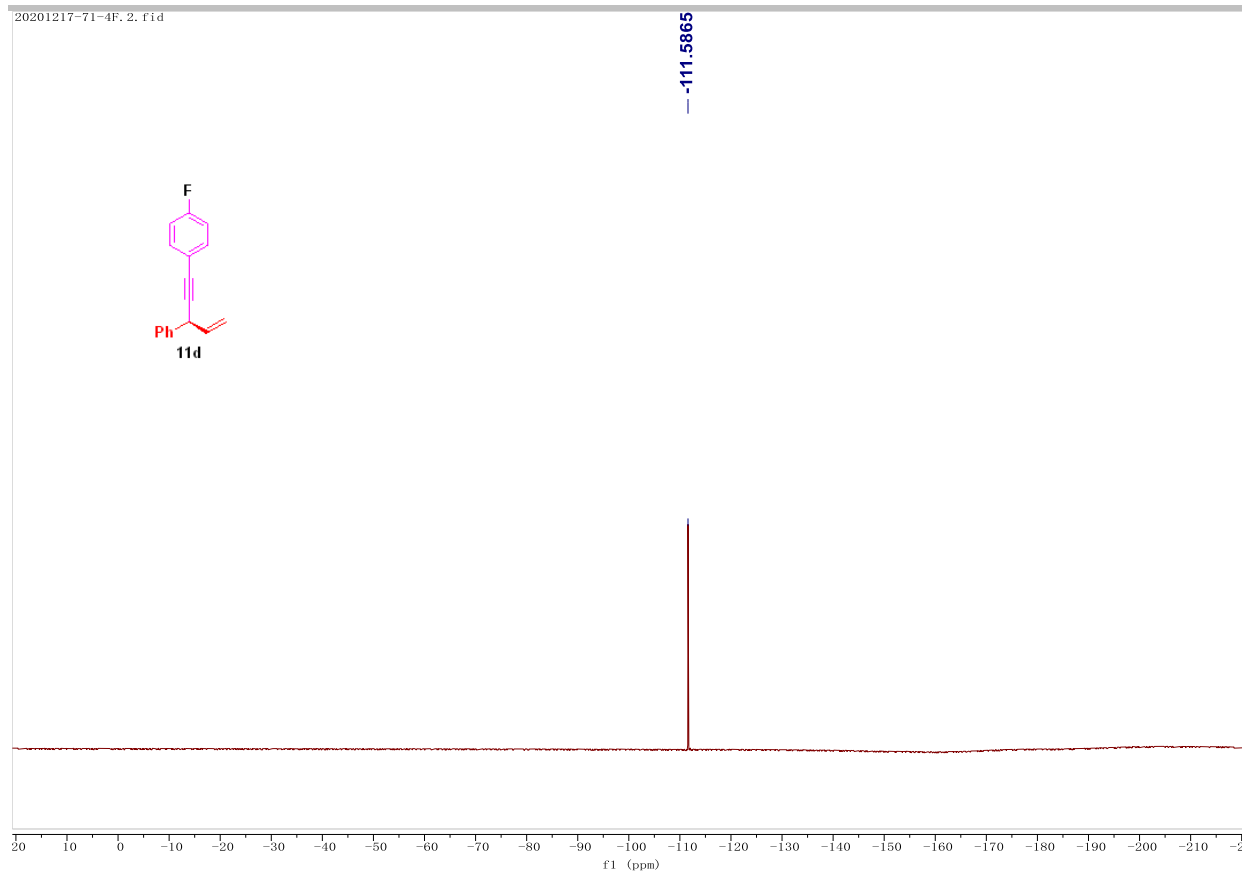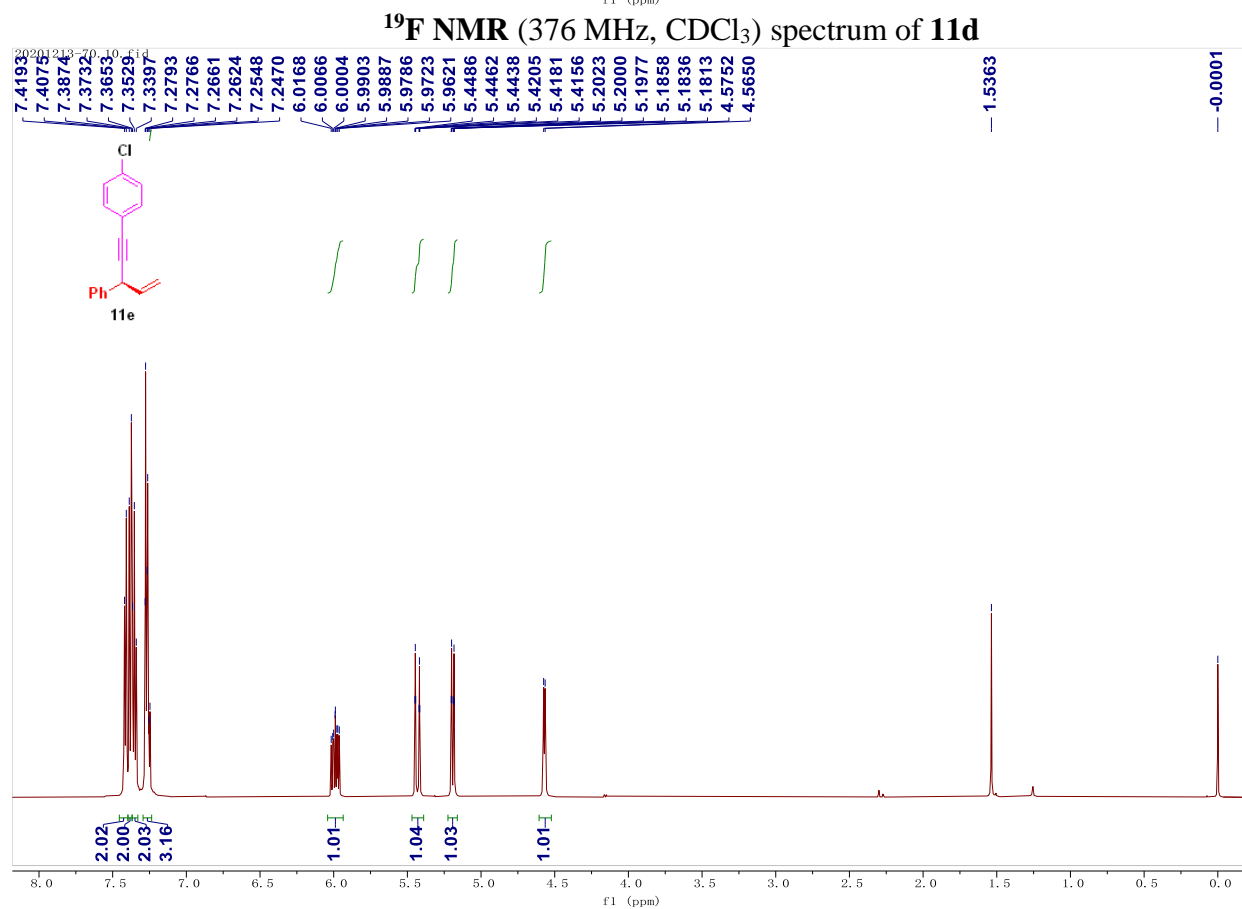

# SUPPORTING INFORMATION

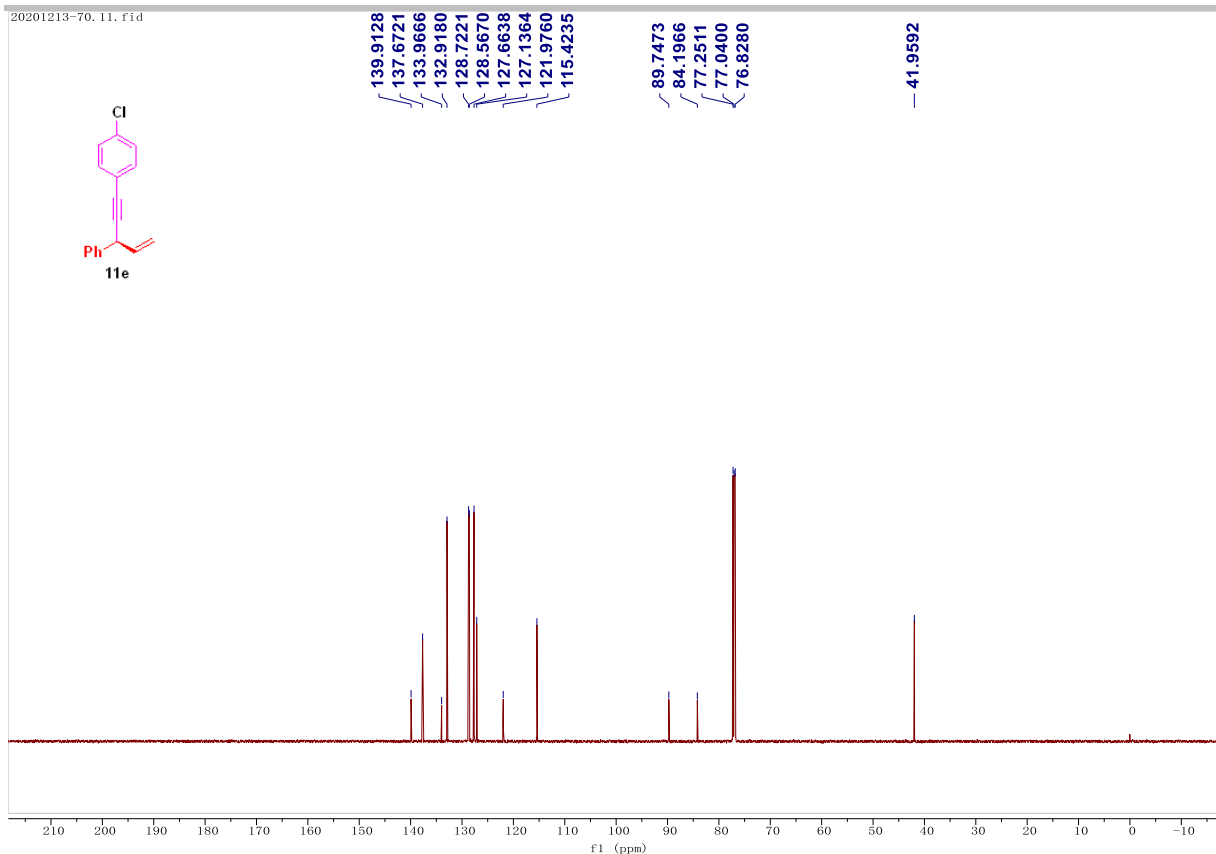

$^{13}\text{C}$  NMR (150 MHz,  $\text{CDCl}_3$ ) spectrum of **11e**

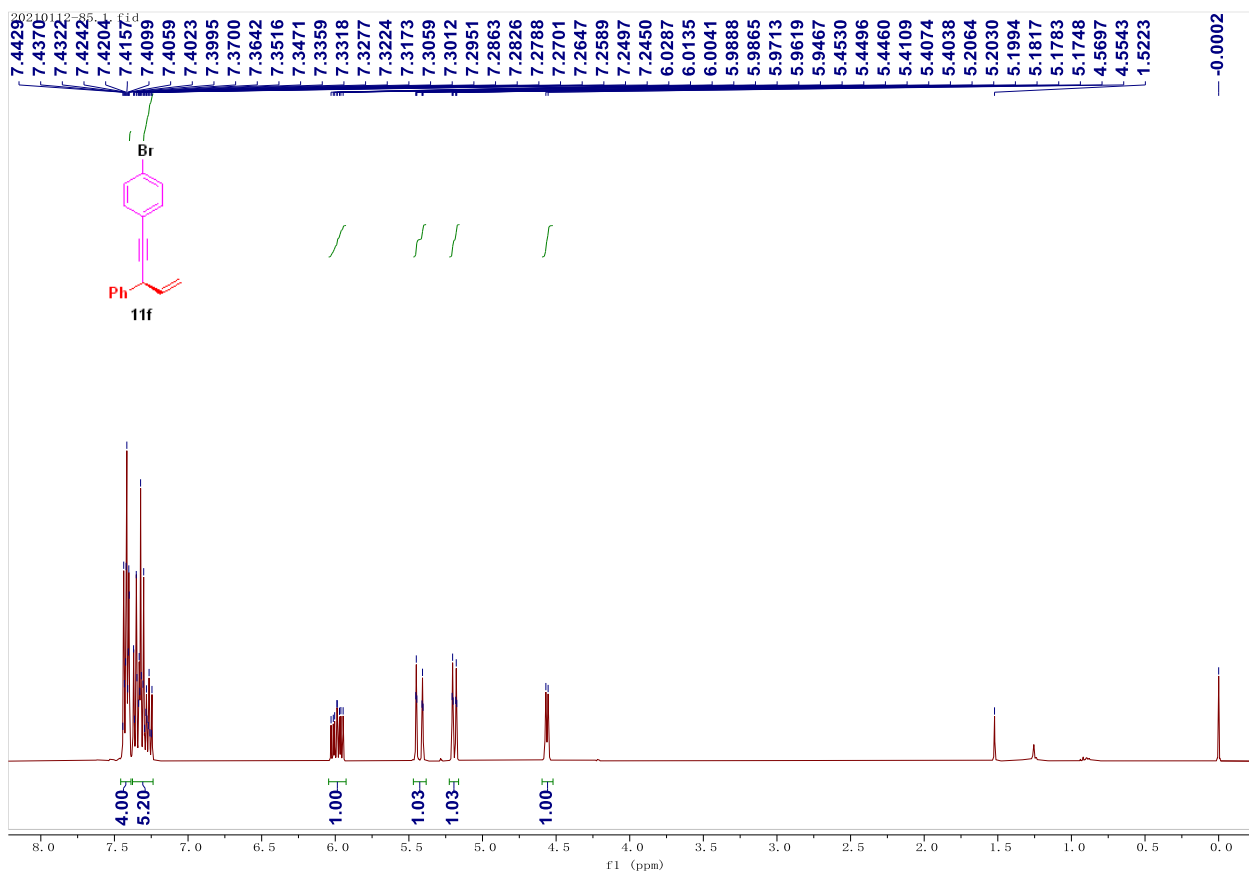

$^1\text{H}$  NMR (400 MHz,  $\text{CDCl}_3$ ) spectrum of **11f**

# SUPPORTING INFORMATION

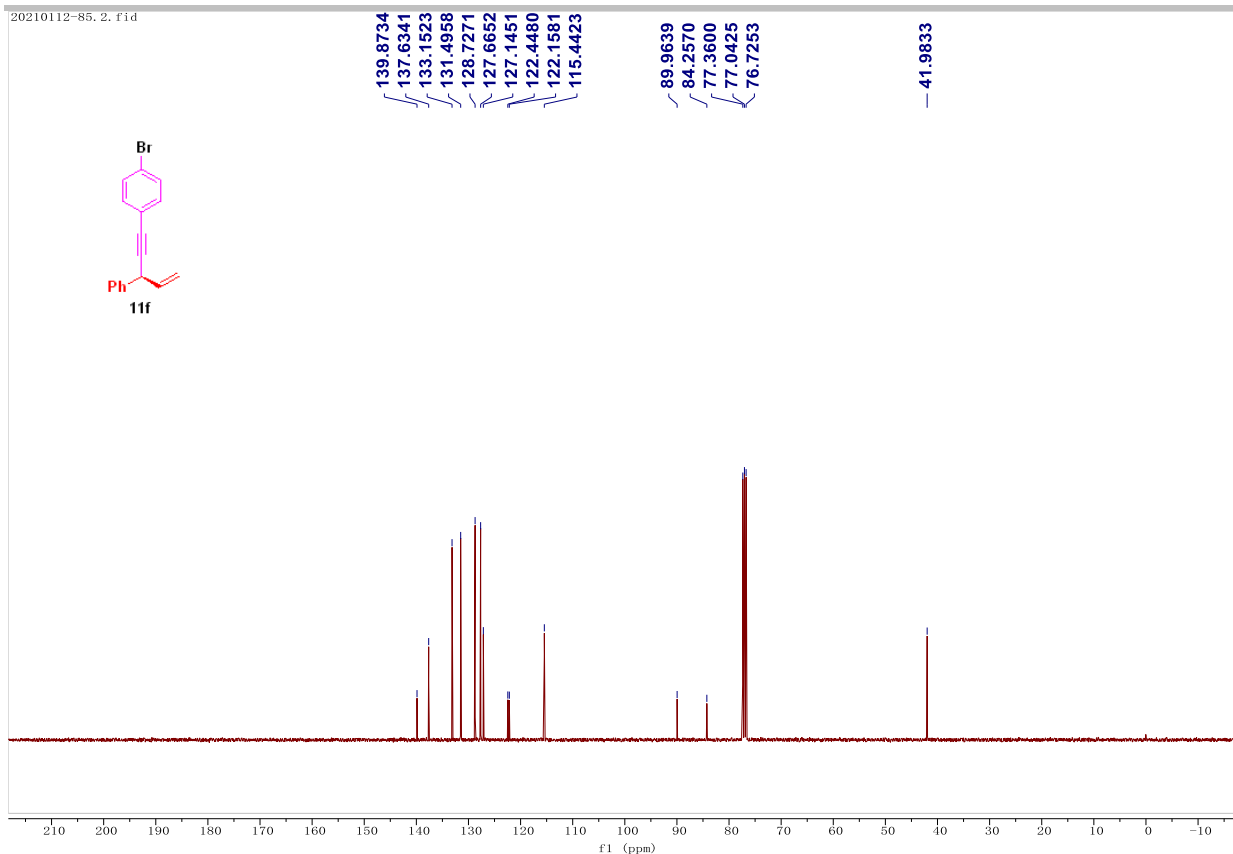

<sup>13</sup>C NMR (100 MHz, CDCl<sub>3</sub>) spectrum of **11f**

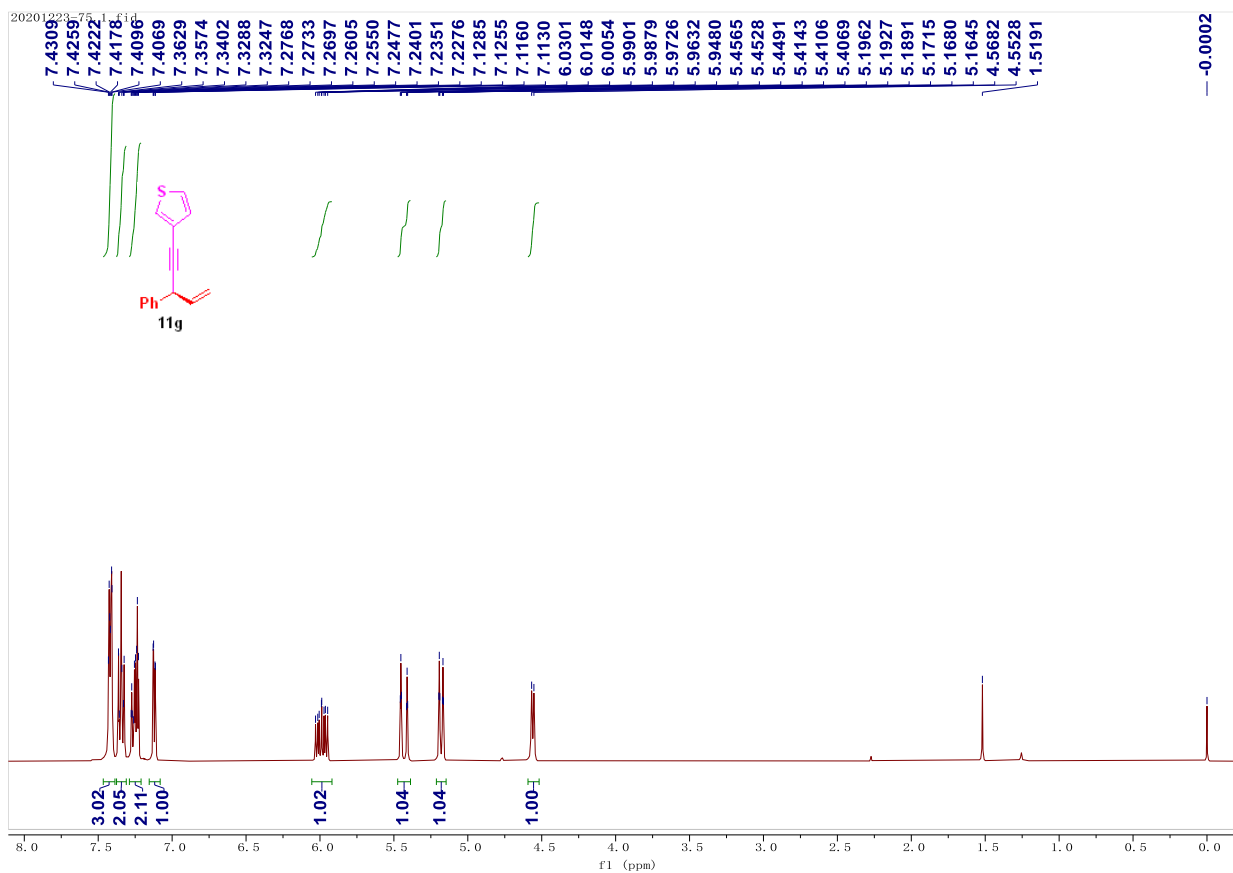

<sup>1</sup>H NMR (400 MHz, CDCl<sub>3</sub>) spectrum of **11g**

# SUPPORTING INFORMATION

20201223-75-c. 1. fid

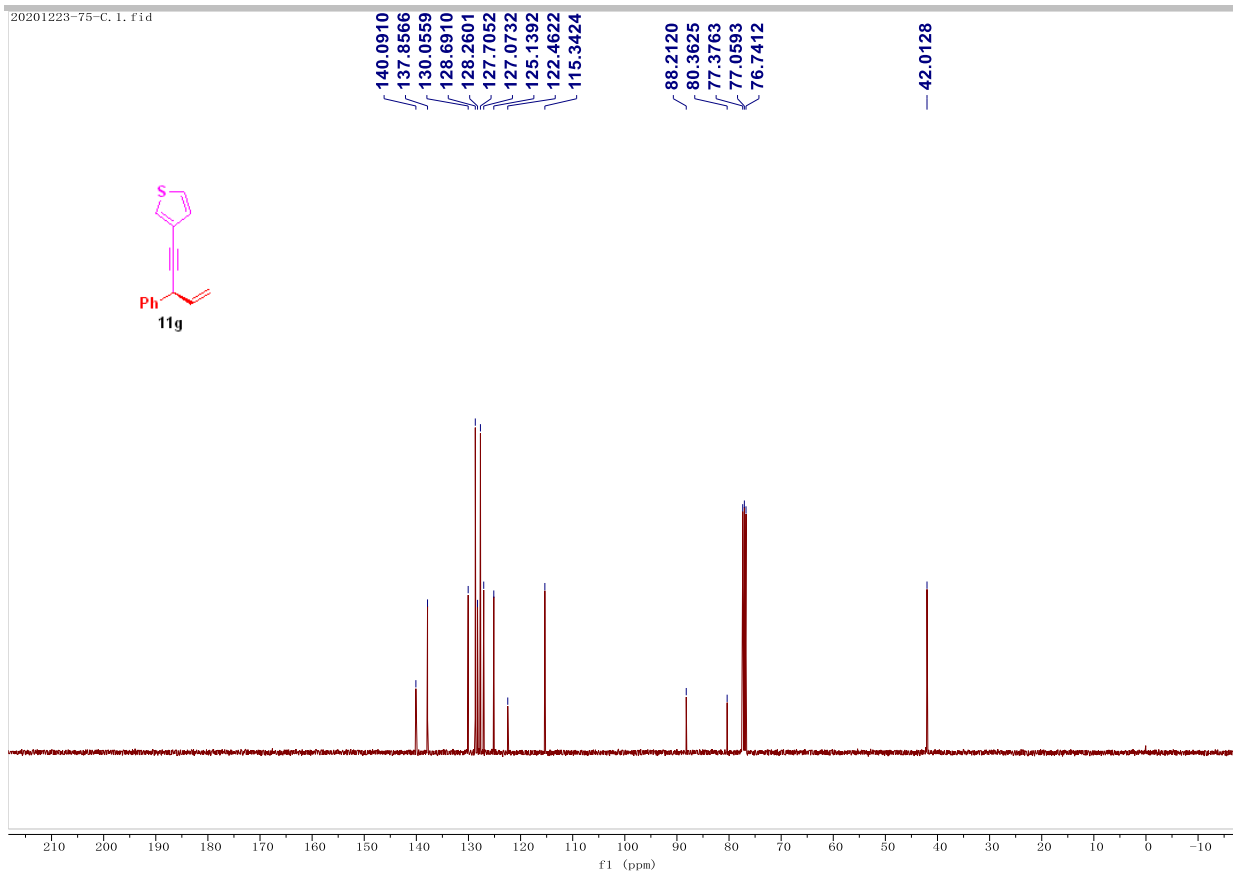

<sup>13</sup>C NMR (100 MHz, CDCl<sub>3</sub>) spectrum of **11g**

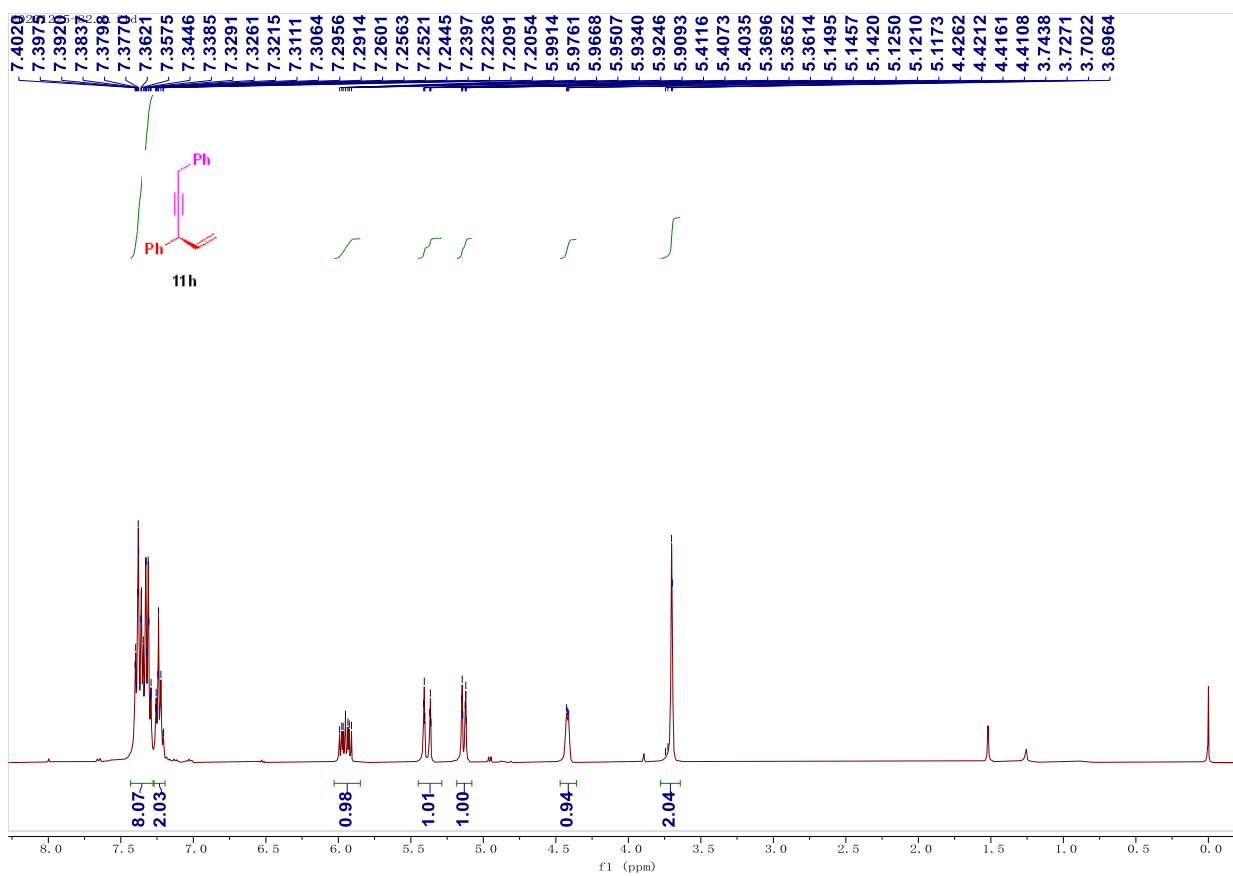

<sup>1</sup>H NMR (400 MHz, CDCl<sub>3</sub>) spectrum of **11h**

# SUPPORTING INFORMATION

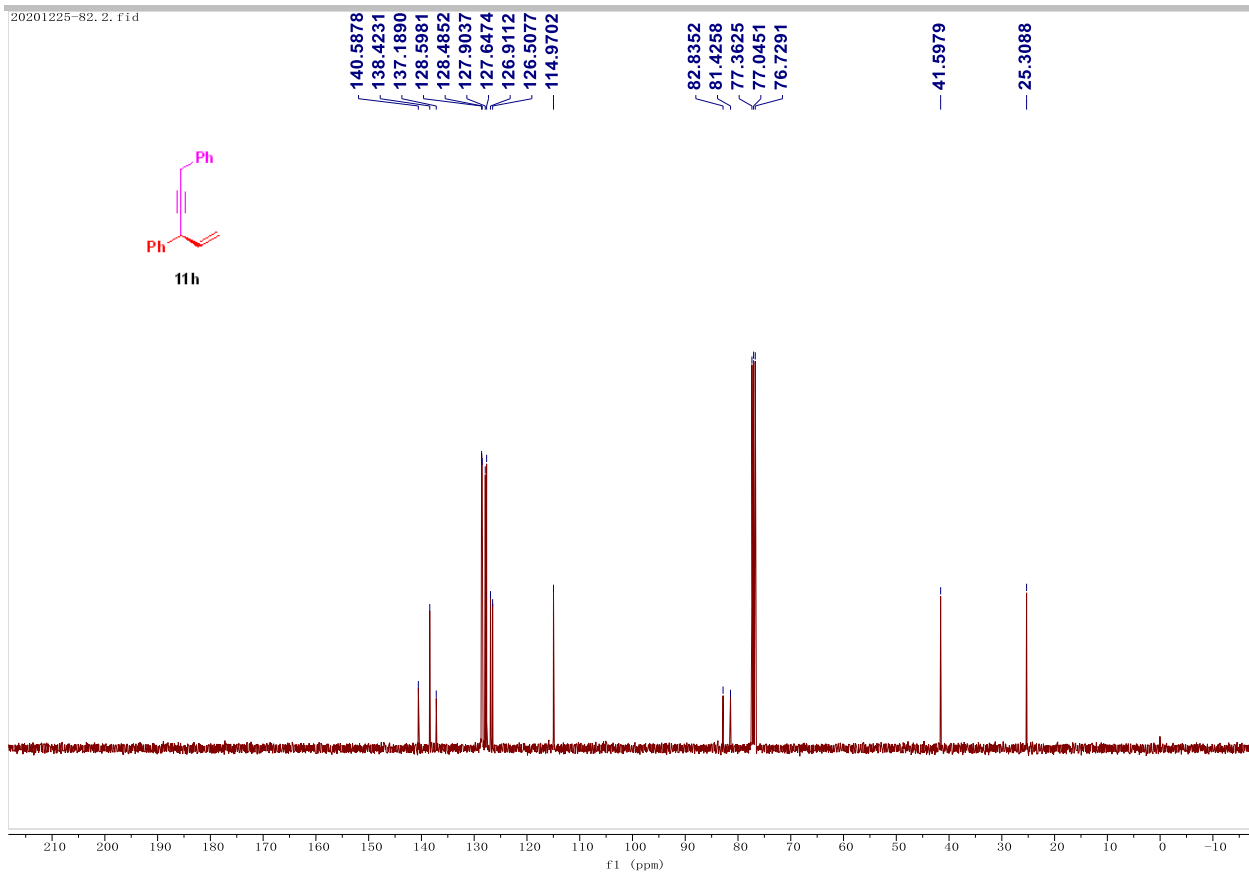

<sup>13</sup>C NMR (100 MHz, CDCl<sub>3</sub>) spectrum of **11h**

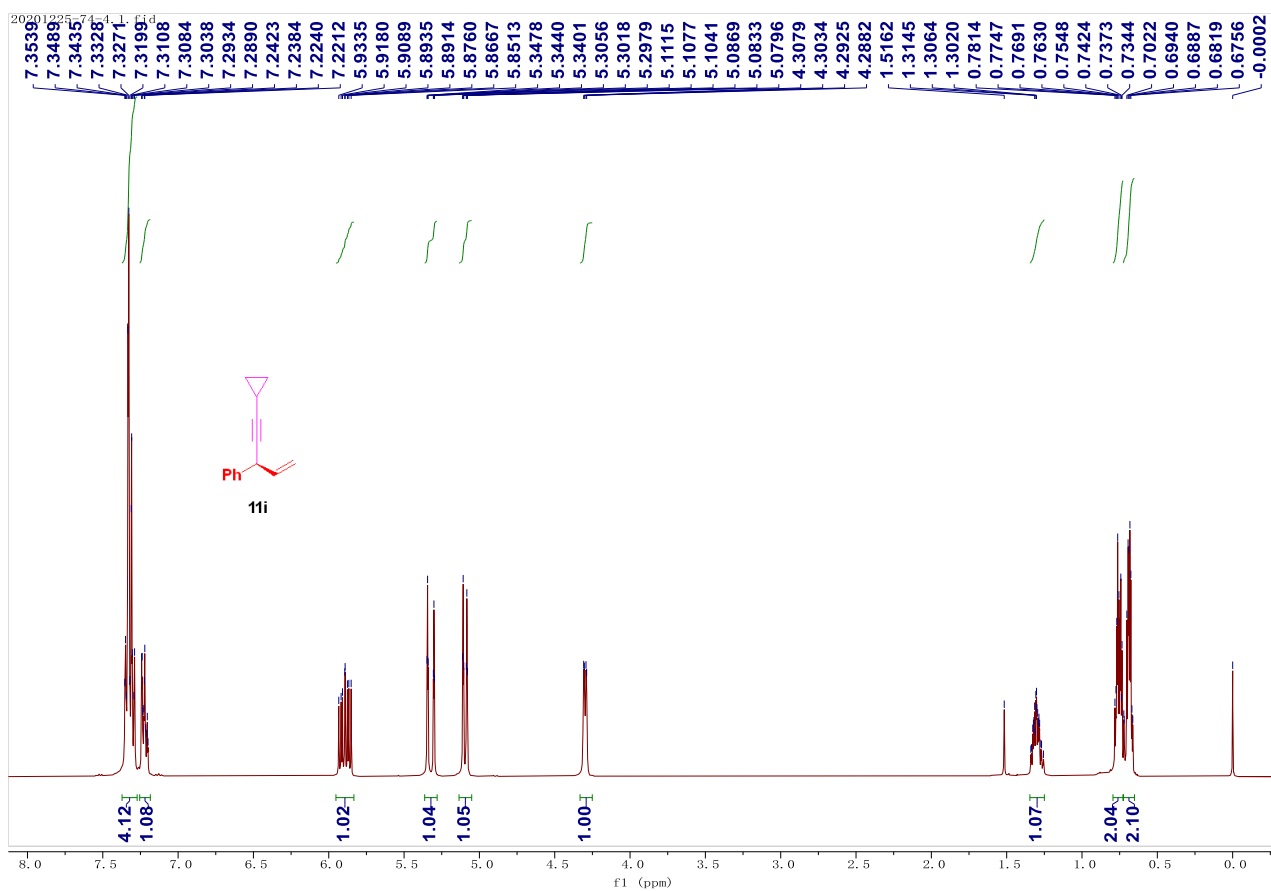

<sup>1</sup>H NMR (400 MHz, CDCl<sub>3</sub>) spectrum of **11i**

# SUPPORTING INFORMATION

20201223-74-3, 2, Fid

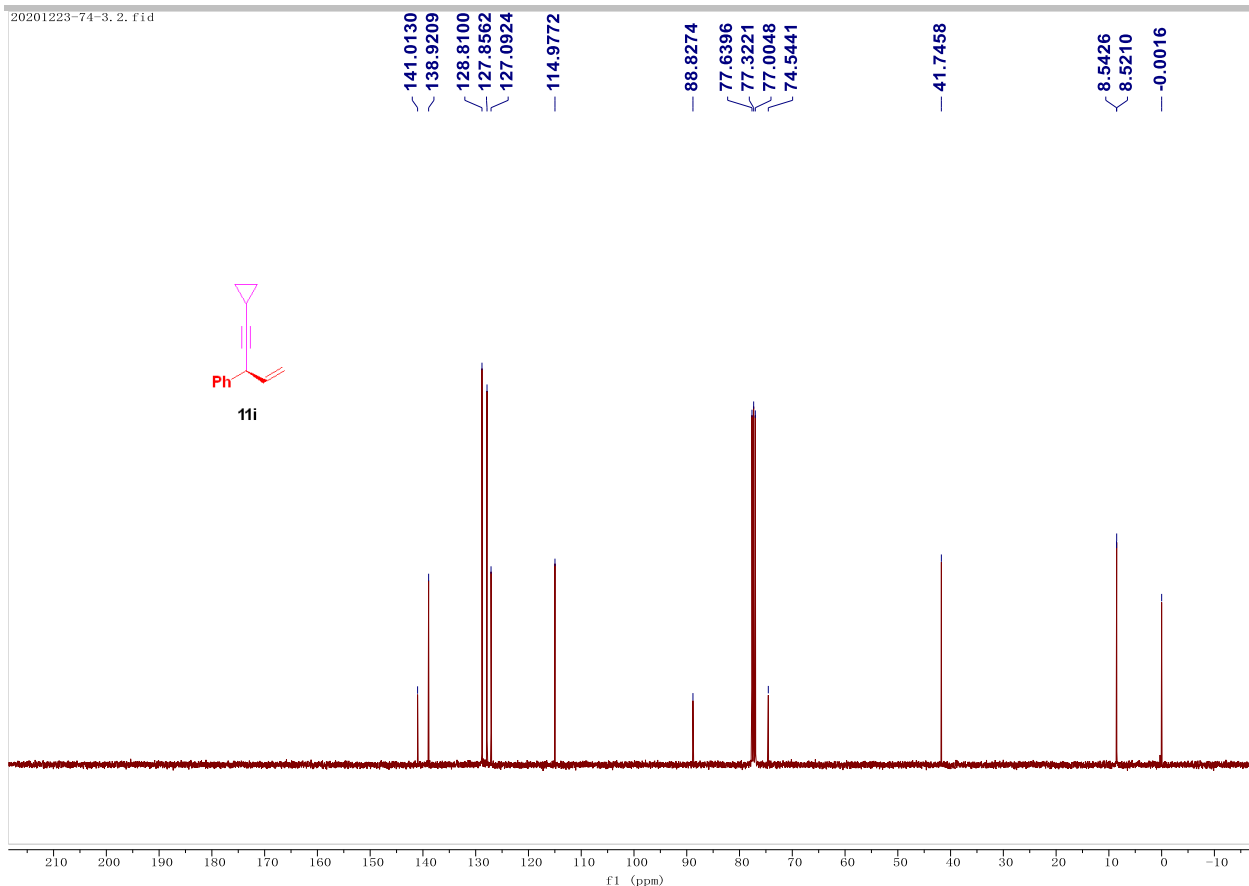

**<sup>13</sup>C NMR (100 MHz, CDCl<sub>3</sub>) spectrum of 11i**

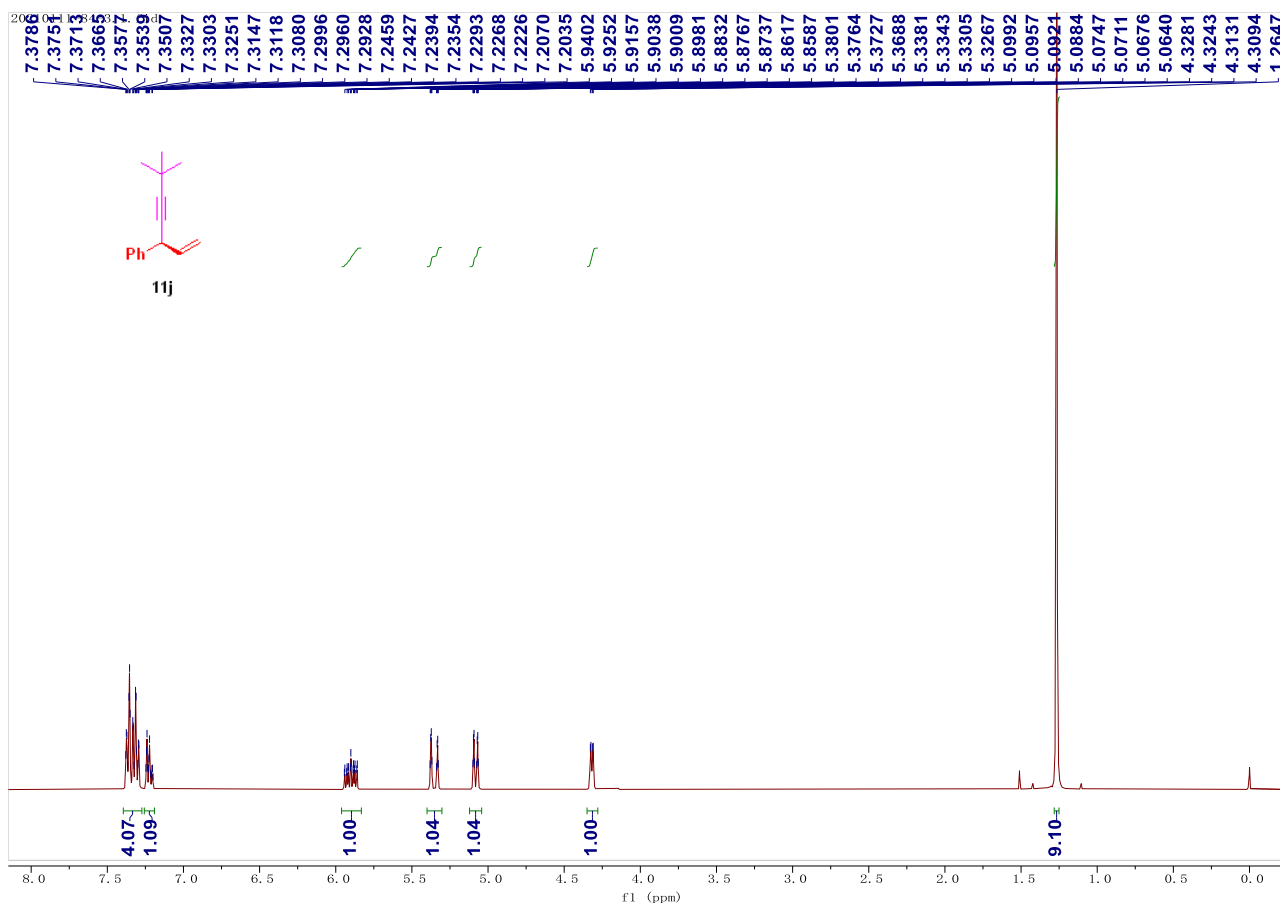

**<sup>1</sup>H NMR (400 MHz, CDCl<sub>3</sub>) spectrum of 11j**

# SUPPORTING INFORMATION

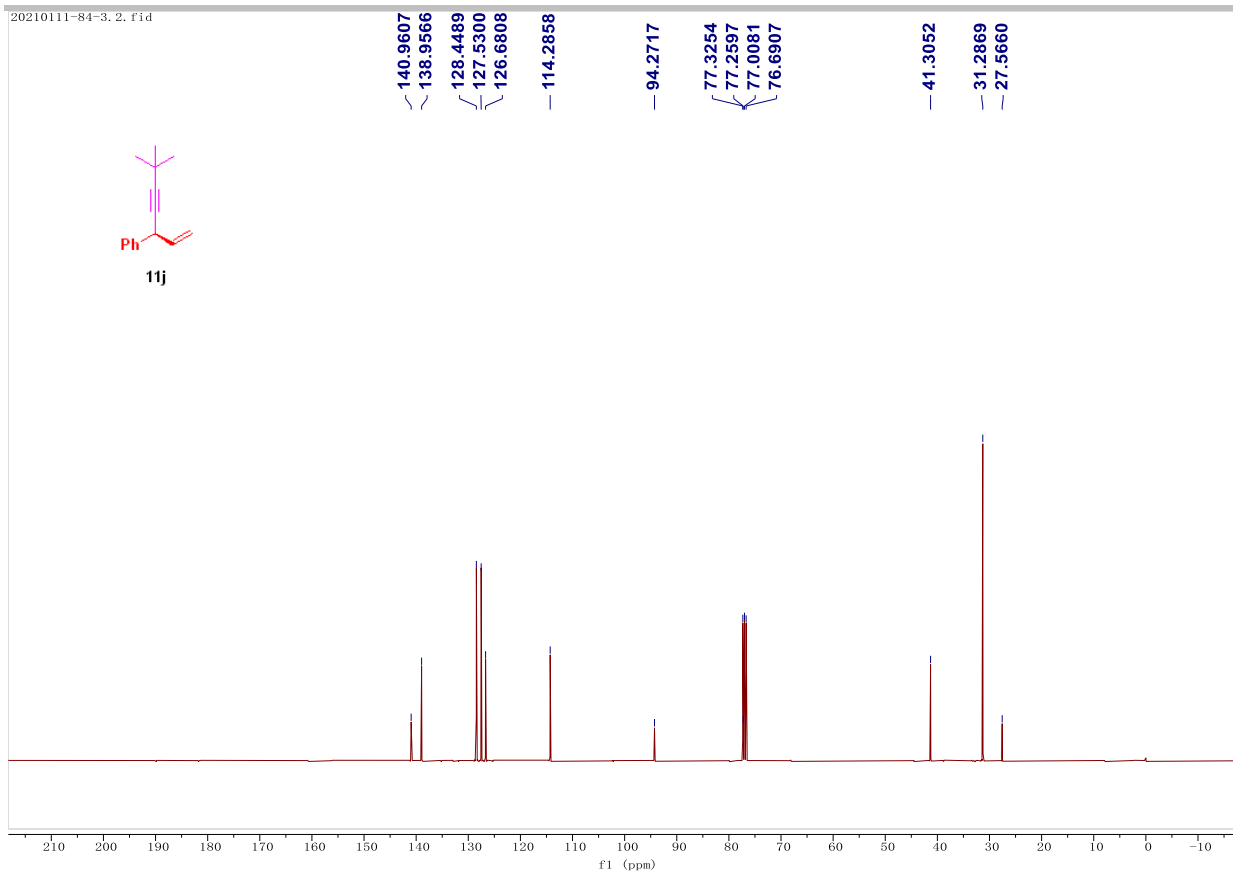

<sup>13</sup>C NMR (100 MHz, CDCl<sub>3</sub>) spectrum of **11j**

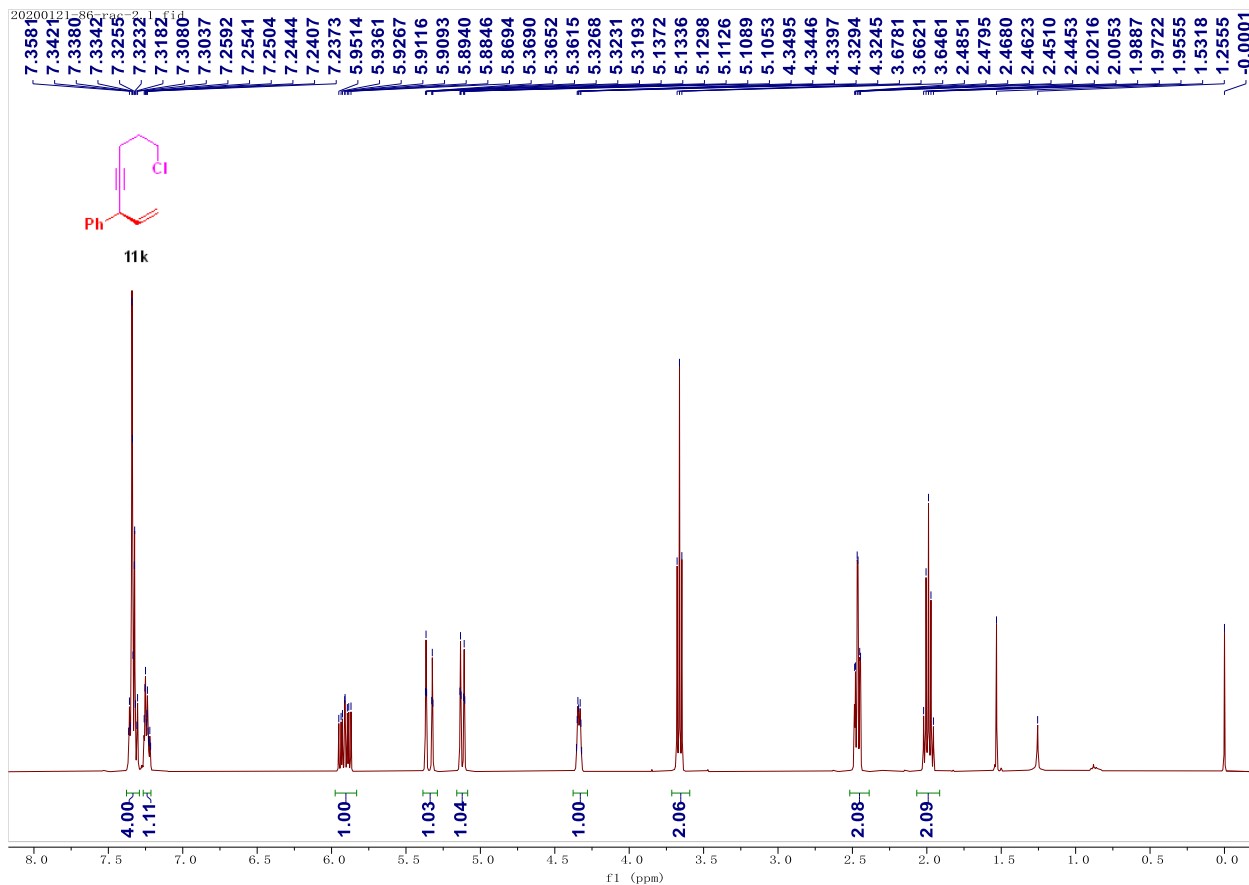

<sup>1</sup>H NMR (400 MHz, CDCl<sub>3</sub>) spectrum of **11k**

# SUPPORTING INFORMATION

20200121-86-rac-2. 2. f1d

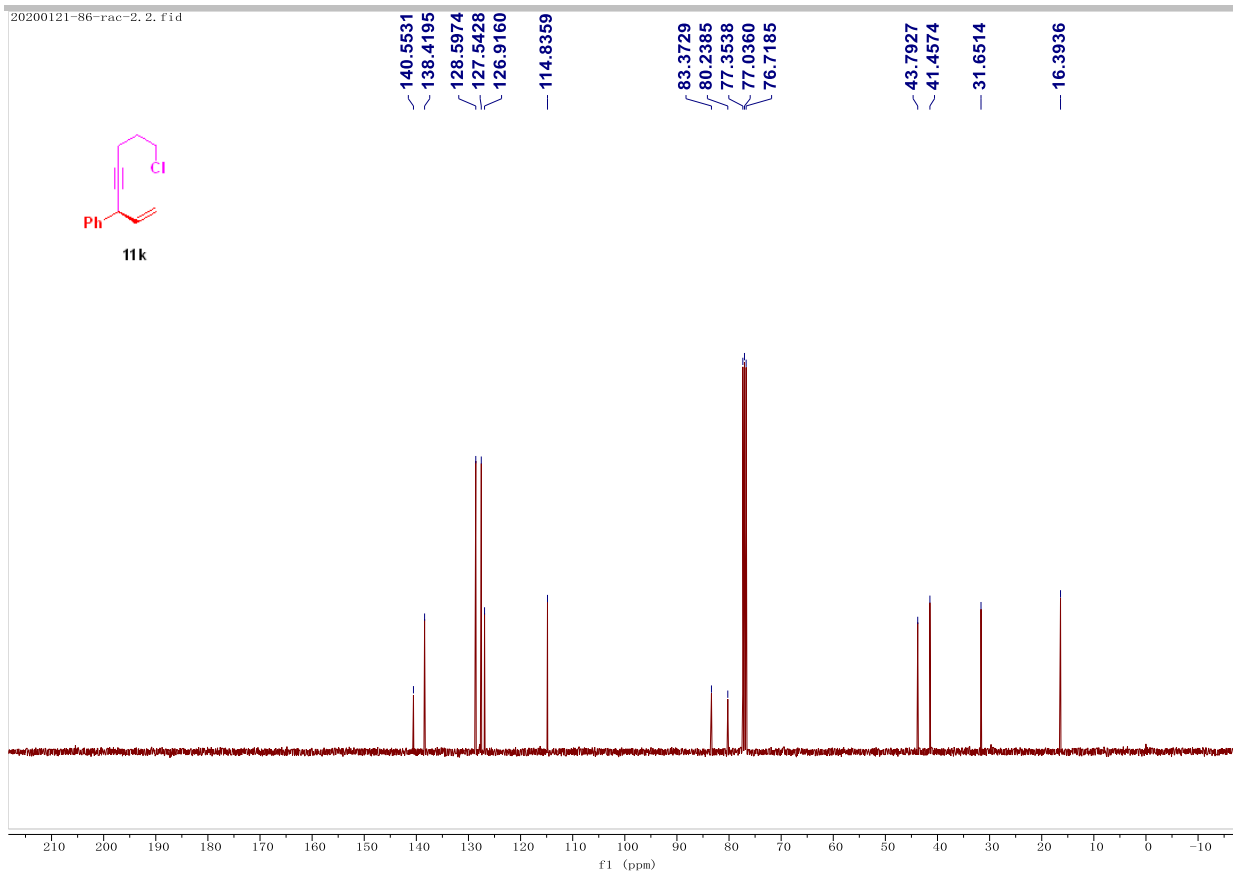

<sup>13</sup>C NMR (100 MHz, CDCl<sub>3</sub>) spectrum of **11k**

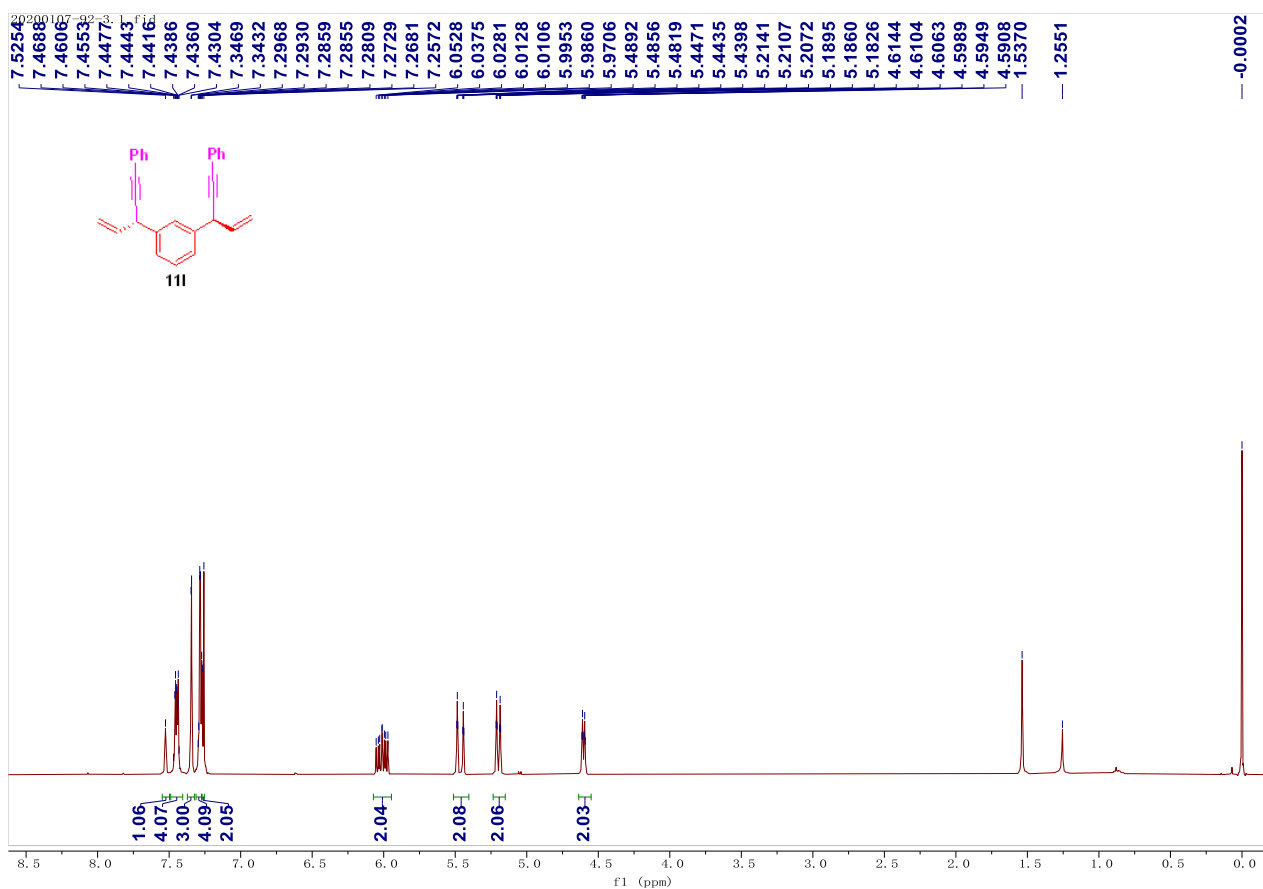

<sup>1</sup>H NMR (400 MHz, CDCl<sub>3</sub>) spectrum of **11l**



# SUPPORTING INFORMATION

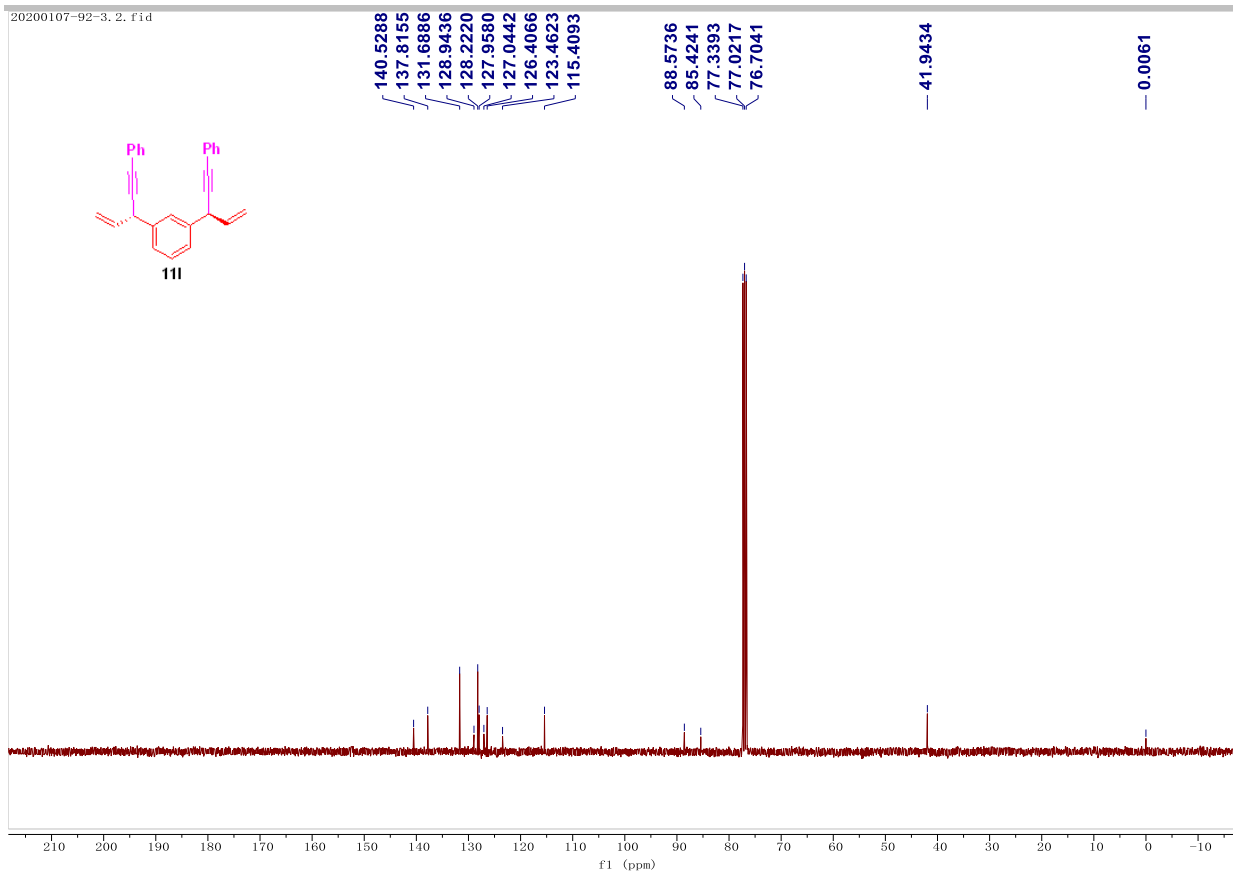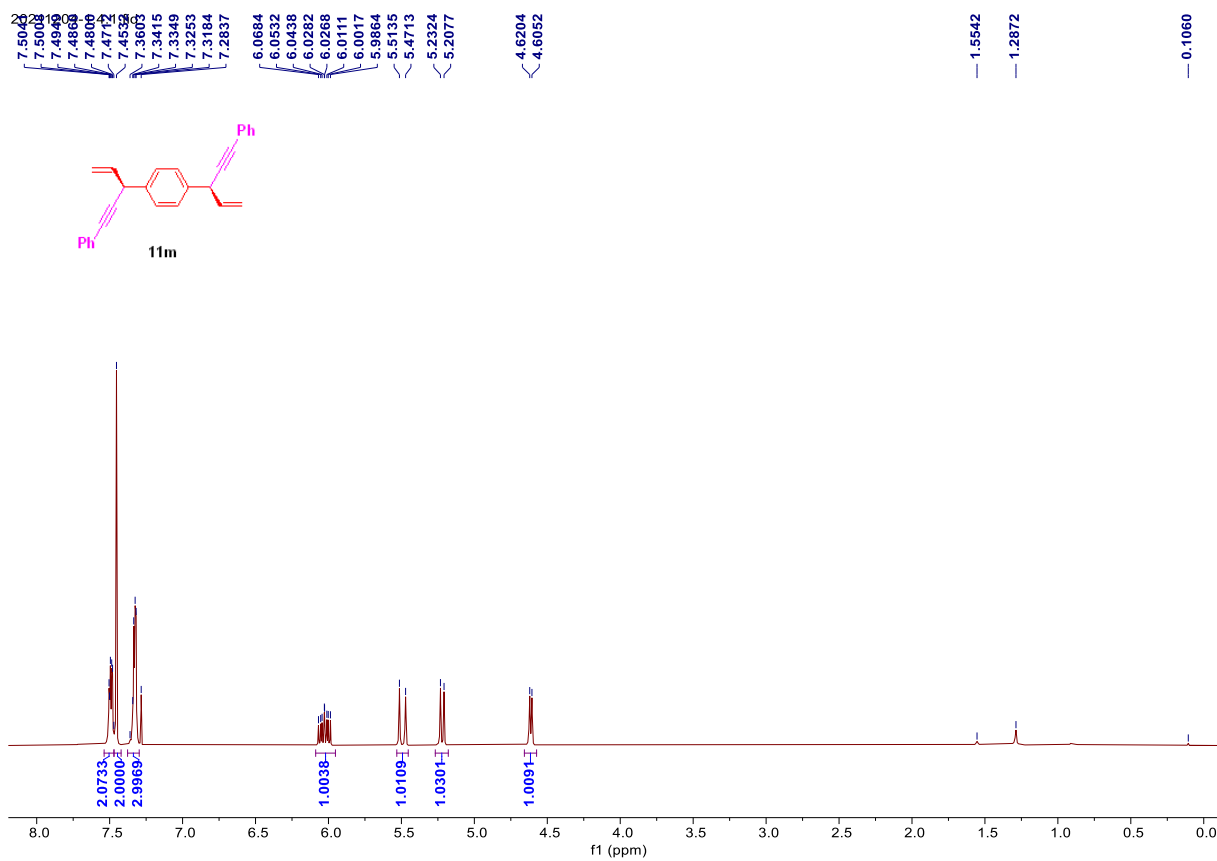

# SUPPORTING INFORMATION

20201228-90-C, 1, F1d

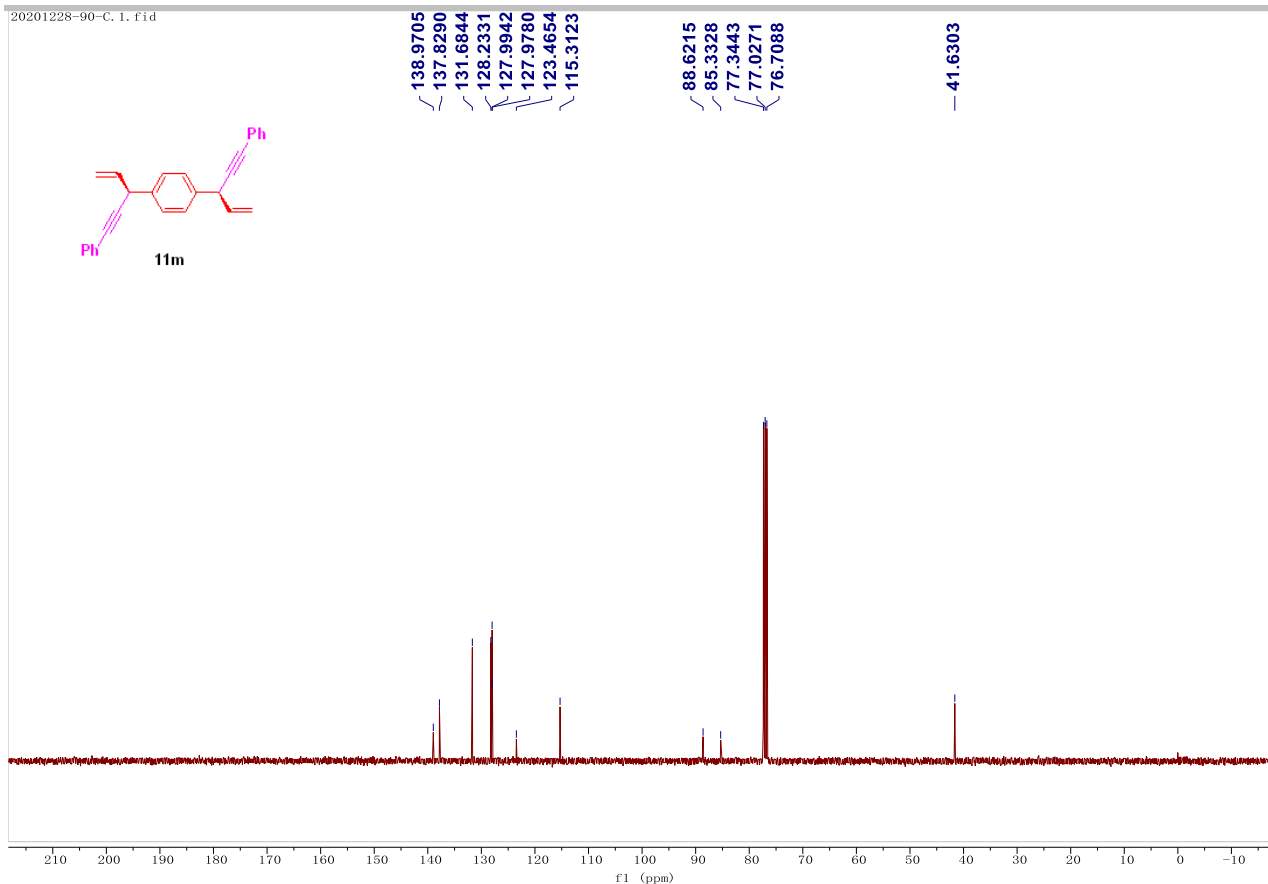

$^{13}\text{C}$  NMR (100 MHz,  $\text{CDCl}_3$ ) spectrum of **11m**

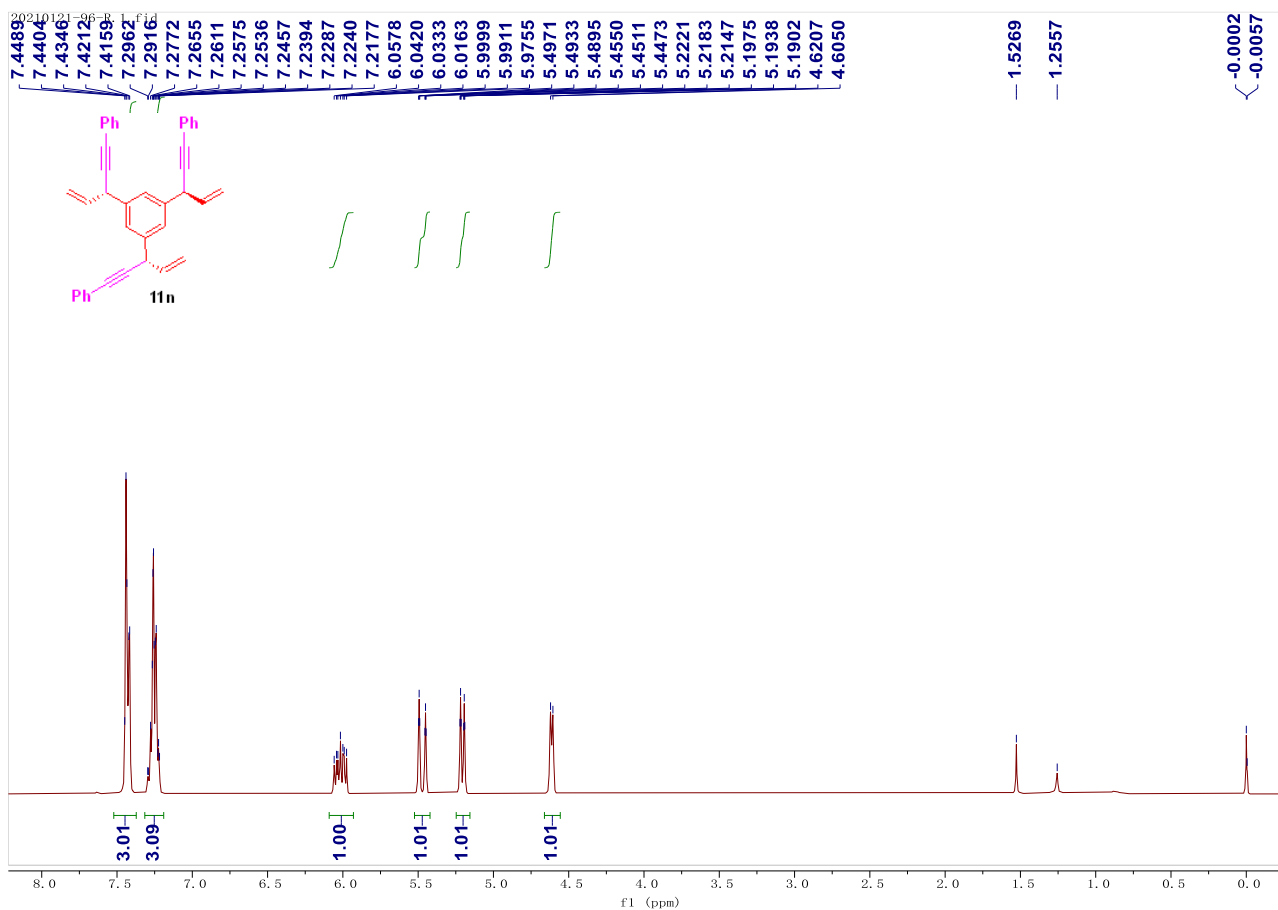

$^1\text{H}$  NMR (400 MHz,  $\text{CDCl}_3$ ) spectrum of **11n**

## SUPPORTING INFORMATION

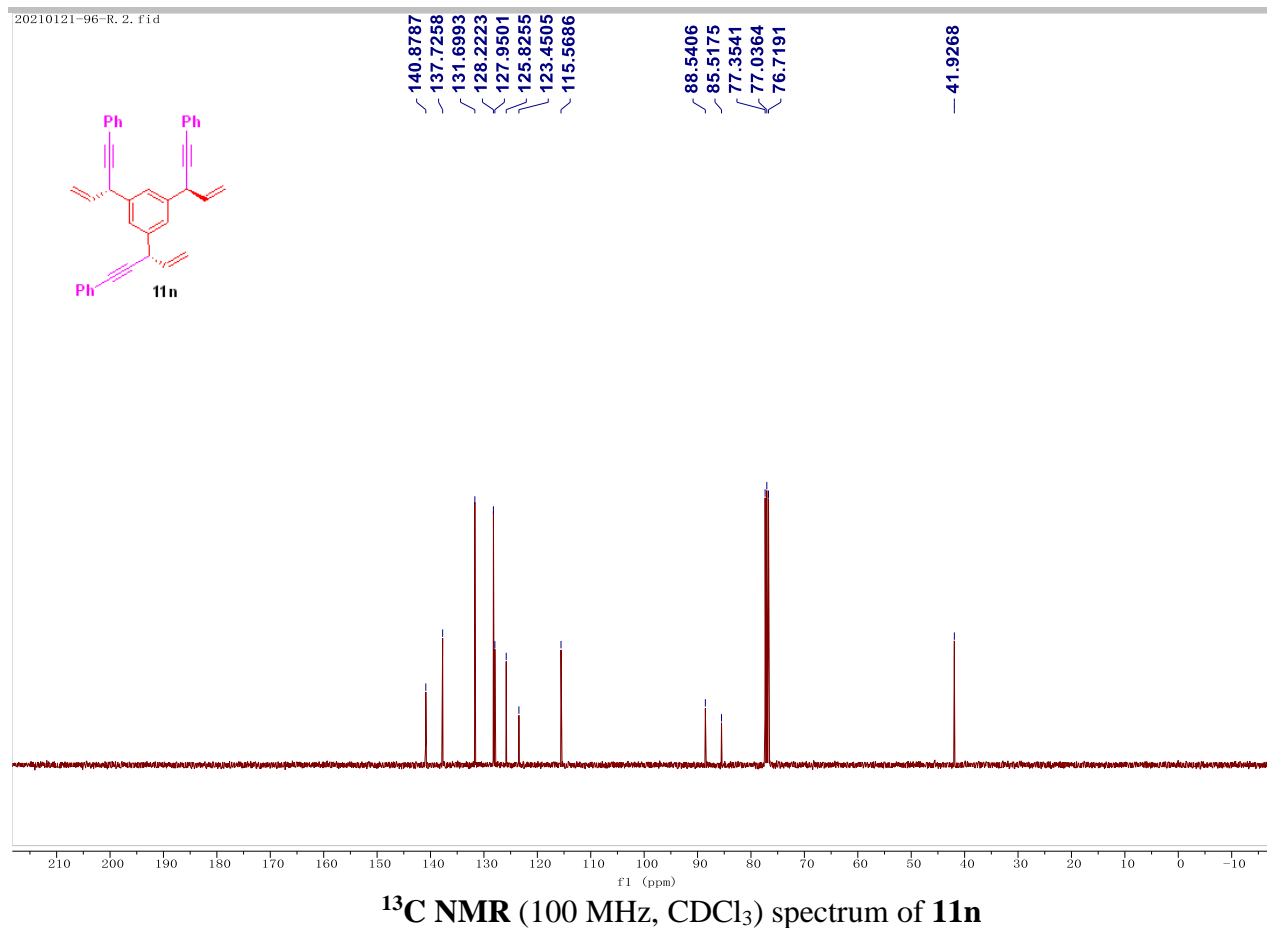

### Reference

- 1) S.-J. Chen, G.-P. Lu and C. Cai, *Synthesis*, **2015**, 47, 976-984.
- 2) N. Ahlsten, A. Bartoszewicz, S. Agrawal and B. Martín-Matute, *Synthesis*, **2011**, 2600-2608.
- 3) a) G. A. Molander and K. M. Traister, *Org. Lett.*, **2013**, 15, 5052-5055; b) J.-F. Wang, X. Meng, C.-H. Zhang, C.-M. Yu and B. Mao, *Org. Lett.*, **2020**, 22, 7427-7432.
- 4) J. Y. Hamilton, D. Sarlah and E. M. Carreira, *Angew. Chem. Int. Ed.*, **2013**, 52, 7532-7535.
